# Supplementary material
Source: PubMed Central journal article supplement (PMC1860543)
Supplement: jclinpath_jcp.2005.035451_1.pdf [file jclinpath_jcp.2005.035451_1.pdf]

## Complimentary information 1: Upregulated in HNSCC vs normal mucosa

| Ranknumber | GEN_ID    | Symbol    | HNSCC (N) | Normal (N) | PSTUDENT     | Name                                                                                                         |
|------------|-----------|-----------|-----------|------------|--------------|--------------------------------------------------------------------------------------------------------------|
| 1          | AK025719  | IGF2      | 19        | 7          | 1.0000000000 | Insulin-like growth factor 2 (somatomedin A)                                                                 |
| 2          | D87450    | KIAA0261  | 19        | 8          | 1.0000000000 | KIAA0261                                                                                                     |
| 3          | D28449    | ID3       | 18        | 8          | 1.0000000000 | Inhibitor of DNA binding 3, dominant negative helix-loop-helix protein                                       |
| 4          | AB033767  | C20orf3   | 19        | 8          | 1.0000000000 | Chromosome 20 open reading frame 3                                                                           |
| 5          | NM_005332 | HBZ       | 19        | 8          | 0.9999999999 | Hemoglobin mu chain                                                                                          |
| 6          | NM_005216 | DDOST     | 19        | 8          | 0.9999999999 | Dolichyl-diphosphooligosaccharide-protein glycosyltransferase                                                |
| 7          | NM_000184 | HBG2      | 17        | 8          | 0.9999999999 | Hemoglobin, gamma G                                                                                          |
| 8          | NM_002444 | MSN       | 19        | 8          | 0.9999999999 | Moesin                                                                                                       |
| 9          | AF119868  |           | 19        | 8          | 0.9999999999 | Data not found                                                                                               |
| 10         | NM_000582 | SPP1      | 19        | 6          | 0.9999999998 | Secreted phosphoprotein 1 (osteopontin, bone sialoprotein I, early T-lymphocyte activation 1)                |
| 11         | NM_002305 | LGALS1    | 18        | 8          | 0.9999999996 | Lectin, galactoside-binding, soluble, 1 (galectin 1)                                                         |
| 12         | NM_004052 |           | 17        | 8          | 0.9999999991 | Data not found                                                                                               |
| 13         | NM_000598 | IGFBP3    | 19        | 8          | 0.9999999989 | Insulin-like growth factor binding protein 3                                                                 |
| 14         | NM_014679 | PIG8      | 17        | 8          | 0.9999999989 | Translokin                                                                                                   |
| 15         | NM_004225 | MFHAS1    | 19        | 8          | 0.9999999986 | Malignant fibrous histiocytoma amplified sequence 1                                                          |
| 16         | NM_005415 | SLC20A1   | 19        | 8          | 0.9999999985 | Solute carrier family 20 (phosphate transporter), member 1                                                   |
| 17         | M11427    | HBG1      | 16        | 8          | 0.9999999983 | Expansin, putative (EXP6)                                                                                    |
| 18         | AL157482  | FNDC3B    | 19        | 7          | 0.9999999974 | Fibronectin type III domain containing 3B                                                                    |
| 19         | NM_018044 | NSUN5     | 19        | 8          | 0.9999999973 | NOL1/NOP2/Sun domain family, member 5                                                                        |
| 20         | NM_005101 | G1P2      | 19        | 8          | 0.9999999970 | Interferon, alpha-inducible protein (clone IFI-15K)                                                          |
| 21         | NM_003523 | HIST1H2BE | 19        | 8          | 0.9999999966 | Histone 1, H2be                                                                                              |
| 22         | Z36811    |           | 19        | 8          | 0.9999999960 | Data not found                                                                                               |
| 23         | NM_005915 | MCM6      | 19        | 8          | 0.9999999960 | MCM6 minichromosome maintenance deficient 6 (MIS5 homolog, S. pombe) (S. cerevisiae)                         |
| 24         | NM_004335 | BST2      | 19        | 8          | 0.9999999956 | Bone marrow stromal cell antigen 2                                                                           |
| 25         | K02847    |           | 19        | 8          | 0.9999999950 | Data not found                                                                                               |
| 26         | NM_004526 | MCM2      | 19        | 8          | 0.9999999944 | MCM2 minichromosome maintenance deficient 2, mitotin (S. cerevisiae)                                         |
| 27         | X69111    | ID3       | 19        | 8          | 0.9999999942 | Inhibitor of DNA binding 3, dominant negative helix-loop-helix protein                                       |
| 28         | M17783    | SERPINE2  | 19        | 8          | 0.9999999930 | Serine (or cysteine) proteinase inhibitor, clade E (nexin, plasminogen activator inhibitor type 1), member 2 |
| 29         | NM_003202 | TCF7      | 14        | 8          | 0.9999999917 | Transcription factor 7 (T-cell specific, HMG-box)                                                            |
| 30         | NM_006429 | CCT7      | 19        | 8          | 0.9999999906 | Chaperonin containing TCPI1, subunit 7 (eta)                                                                 |
| 31         | NM_001257 | CDH13     | 16        | 8          | 0.9999999897 | Cadherin 13, H-cadherin (heart)                                                                              |

|    |           |           |    |   |             |                                                                                                    |
|----|-----------|-----------|----|---|-------------|----------------------------------------------------------------------------------------------------|
| 32 | NM_004699 | FAM50A    | 19 | 8 | 0.999999891 | Family with sequence similarity 50, member A                                                       |
| 33 | NM_003088 | FSCN1     | 19 | 8 | 0.999999865 | Fascin homolog 1, actin-bundling protein (Strongylocentrotus purpuratus)                           |
| 34 | NM_006423 | RABAC1    | 19 | 8 | 0.999999855 | Rab acceptor 1 (prenylated)                                                                        |
| 35 | NM_006169 | NNMT      | 19 | 8 | 0.999999854 | Nicotinamide N-methyltransferase                                                                   |
| 36 | D28363    |           | 19 | 8 | 0.999999849 | Data not found                                                                                     |
| 37 | X04236    |           | 18 | 8 | 0.999999829 | Data not found                                                                                     |
| 38 | AF070600  | TUBB      | 19 | 8 | 0.999999797 | Tubulin, beta polypeptide                                                                          |
| 39 | S79281    |           | 18 | 8 | 0.999999792 | Data not found                                                                                     |
| 40 | NM_002391 | MDK       | 15 | 8 | 0.999999783 | Midkine (neurite growth-promoting factor 2)                                                        |
| 41 | NM_015871 | ZNF593    | 19 | 8 | 0.999999763 | Zinc finger protein 593                                                                            |
| 42 | NM_000612 | IGF2      | 19 | 8 | 0.999999719 | Insulin-like growth factor 2 (somatomedin A)                                                       |
| 43 | D86982    | ANKS1     | 19 | 8 | 0.999999716 | Ankyrin repeat and sterile alpha motif domain containing 1                                         |
| 44 | NM_001084 | PLOD3     | 19 | 7 | 0.999999696 | Procollagen-lysine, 2-oxoglutarate 5-dioxygenase 3                                                 |
| 45 | NM_001762 | CCT6A     | 19 | 8 | 0.999999682 | Chaperonin containing TCP1, subunit 6A (zeta 1)                                                    |
| 46 | AK024716  | RRS1      | 19 | 8 | 0.999999658 | RRS1 ribosome biogenesis regulator homolog (S. cerevisiae)                                         |
| 47 | NM_000295 | SERPINA1  | 12 | 8 | 0.999999643 | Serine (or cysteine) proteinase inhibitor, clade A (alpha-1 antiproteinase, antitrypsin), member 1 |
| 48 | NM_006907 | PYCR1     | 19 | 8 | 0.999999619 | Pyrroline-5-carboxylate reductase 1                                                                |
| 49 | NM_007355 | HSPCB     | 19 | 8 | 0.999999606 | Heat shock 90kDa protein 1, beta                                                                   |
| 50 | NM_012319 | SLC39A6   | 19 | 8 | 0.999999592 | Solute carrier family 39 (zinc transporter), member 6                                              |
| 51 | NM_005030 | PLK1      | 16 | 8 | 0.999999589 | Polo-like kinase 1 (Drosophila)                                                                    |
| 52 | NM_015921 | C6orf82   | 19 | 8 | 0.999999554 | Chromosome 6 open reading frame 82                                                                 |
| 53 | NM_000075 | CDK4      | 19 | 8 | 0.999999549 | Cyclin-dependent kinase 4                                                                          |
| 54 | NM_007107 | SSR3      | 19 | 8 | 0.999999483 | Signal sequence receptor, gamma (translocon-associated protein gamma)                              |
| 55 | NM_003299 | TRA1      | 19 | 8 | 0.999999432 | Tumor rejection antigen (gp96) 1                                                                   |
| 56 | NM_002205 | ITGA5     | 17 | 8 | 0.999999412 | Integrin, alpha 5 (fibronectin receptor, alpha polypeptide)                                        |
| 57 | X15624    | PARP2     | 19 | 8 | 0.999999372 | Ribonuclease P RNA component H1                                                                    |
| 58 | NM_003246 | THBS1     | 19 | 8 | 0.999999359 | Thrombospondin 1                                                                                   |
| 59 | NM_003524 | HIST1H2BH | 19 | 8 | 0.999999334 | Histone 1, H2bh                                                                                    |
| 60 | NM_003107 | SOX4      | 18 | 8 | 0.999999303 | SRY (sex determining region Y)-box 4                                                               |
| 61 | NM_004047 | ATP6V0B   | 19 | 8 | 0.999999298 | ATPase, H+ transporting, lysosomal 21kDa, V0 subunit c"                                            |
| 62 | X15880    | COL6A1    | 19 | 7 | 0.999999228 | Collagen, type VI, alpha 1                                                                         |
| 63 | AK025006  |           | 19 | 8 | 0.999998931 | Data not found                                                                                     |
| 64 | NM_002794 | PSMB2     | 19 | 8 | 0.999998793 | Proteasome (prosome, macropain) subunit, beta type, 2                                              |

|    |           |         |    |   |              |                                                                       |
|----|-----------|---------|----|---|--------------|-----------------------------------------------------------------------|
| 65 | NM_007173 | PRSS23  | 19 | 8 | 0.9999998761 | Protease, serine, 23                                                  |
| 66 | NM_004394 | DAP     | 19 | 8 | 0.9999998753 | Death-associated protein                                              |
| 67 | X02067    |         | 19 | 8 | 0.9999998718 | Data not found                                                        |
| 68 | NM_001467 | SLC37A4 | 16 | 8 | 0.9999998611 | Solute carrier family 37 (glycerol-6-phosphate transporter), member 4 |
| 69 | AL050187  | FKBP9   | 18 | 8 | 0.9999998501 | FK506 binding protein 9, 63 kDa                                       |
| 70 | NM_001154 | ANXA5   | 18 | 8 | 0.9999998477 | Annexin A5                                                            |
| 71 | K02046    |         | 19 | 8 | 0.9999998399 | Data not found                                                        |
| 72 | NM_002796 | PSMB4   | 19 | 8 | 0.9999998314 | Proteasome (prosome, macropain) subunit, beta type, 4                 |
| 73 | M29212    |         | 19 | 8 | 0.9999998091 | Data not found                                                        |
| 74 | NM_002797 | PSMB5   | 19 | 8 | 0.9999998046 | Proteasome (prosome, macropain) subunit, beta type, 5                 |
| 75 | NM_005009 | NME4    | 19 | 8 | 0.9999998044 | Non-metastatic cells 4, protein expressed in                          |
| 76 | NM_002160 | TNC     | 18 | 8 | 0.9999998038 | Tenascin C (hexabrachion)                                             |
| 77 | AJ292757  | TUBB1   | 19 | 8 | 0.9999997831 | Tubulin, beta 1                                                       |
| 78 | NM_002610 | PDK1    | 19 | 8 | 0.9999997797 | Pyruvate dehydrogenase kinase, isoenzyme 1                            |
| 79 | NM_001363 | DKC1    | 19 | 8 | 0.9999997748 | Dyskeratosis congenita 1, dyskerin                                    |
| 80 | NM_014905 | GLS     | 19 | 8 | 0.9999997742 | Glutaminase                                                           |
| 81 | NM_006943 | SOX12   | 19 | 8 | 0.9999997731 | SRY (sex determining region Y)-box 12                                 |
| 82 | X96660    |         | 19 | 7 | 0.9999997503 | Data not found                                                        |
| 83 | D28381    |         | 19 | 8 | 0.9999997459 | Data not found                                                        |
| 84 | NM_003981 | PRC1    | 19 | 8 | 0.9999997412 | Protein regulator of cytokinesis 1                                    |
| 85 | NM_003118 | SPARC   | 12 | 8 | 0.9999997231 | Secreted protein, acidic, cysteine-rich (osteonectin)                 |
| 86 | NM_001134 | AFP     | 15 | 7 | 0.9999996846 | Alpha-fetoprotein                                                     |
| 87 | AJ006835  | CHC1    | 18 | 7 | 0.9999996721 | Regulator of chromosome condensation 1                                |
| 88 | NM_001515 | GTF2H2  | 19 | 6 | 0.9999996621 | General transcription factor IIH, polypeptide 2, 44kDa                |
| 89 | NM_002824 | PTMS    | 18 | 8 | 0.9999996439 | Parathymosin                                                          |
| 90 | NM_016553 | NUP62   | 19 | 8 | 0.9999996253 | Interleukin 4 induced 1                                               |
| 91 | X55525    | COL1A2  | 19 | 8 | 0.9999995744 | Collagen, type I, alpha 2                                             |
| 92 | NM_017548 | H41     | 18 | 8 | 0.9999995017 | Hypothetical protein H41                                              |
| 93 | NM_006868 | RAB31   | 19 | 8 | 0.9999994884 | RAB31, member RAS oncogene family                                     |
| 94 | NM_018943 | TUBA8   | 19 | 8 | 0.9999994483 | Tubulin, alpha 8                                                      |
| 95 | NM_014285 | EXOSC2  | 19 | 8 | 0.9999994170 | Exosome component 2                                                   |
| 96 | AB019565  |         | 19 | 7 | 0.9999994091 | Data not found                                                        |
| 97 | NM_002882 | RANBP1  | 19 | 8 | 0.9999993908 | RAN binding protein 1                                                 |

|     |           |           |    |   |              |                                                                                                    |
|-----|-----------|-----------|----|---|--------------|----------------------------------------------------------------------------------------------------|
| 98  | NM_005507 | CFL1      | 19 | 8 | 0.9999993295 | Cofilin 1 (non-muscle)                                                                             |
| 99  | NM_013282 | UHRF1     | 19 | 8 | 0.9999993066 | Chromosome 19 open reading frame 31                                                                |
| 100 | NM_005794 | DHRS2     | 18 | 8 | 0.9999992853 | Dehydrogenase/reductase (SDR family) member 2                                                      |
| 101 | NM_006280 | SSR4      | 19 | 8 | 0.9999992076 | Signal sequence receptor, delta (translocon-associated protein delta)                              |
| 102 | NM_014145 | C20orf30  | 19 | 8 | 0.9999991333 | Chromosome 20 open reading frame 30                                                                |
| 103 | NM_005641 | TAF6      | 18 | 8 | 0.9999991326 | TAF6 RNA polymerase II, TATA box binding protein (TBP)-associated factor, 80kDa                    |
| 104 | NM_004741 | NOLC1     | 19 | 8 | 0.9999990500 | Nucleolar and coiled-body phosphoprotein 1                                                         |
| 105 | AL096857  | XTP2      | 19 | 7 | 0.9999990297 | BAT2 domain containing 1                                                                           |
| 106 | NM_002156 | HSPD1     | 19 | 8 | 0.9999990292 | Heat shock 60kDa protein 1 (chaperonin)                                                            |
| 107 | NM_012179 | FBXO7     | 18 | 8 | 0.9999990212 | F-box protein 7                                                                                    |
| 108 | NM_014899 | RHOBTB3   | 18 | 8 | 0.9999989539 | Rho-related BTB domain containing 3                                                                |
| 109 | NM_001760 | CCND3     | 19 | 7 | 0.9999989181 | Cyclin D3                                                                                          |
| 110 | NM_014269 | ADAM29    | 16 | 8 | 0.9999989064 | A disintegrin and metalloproteinase domain 29                                                      |
| 111 | NM_003537 | HIST1H3B  | 19 | 8 | 0.9999988996 | Histone 1, H3b                                                                                     |
| 112 | AB024704  | TPX2      | 19 | 8 | 0.9999988705 | TPX2, microtubule-associated, homolog (Xenopus laevis)                                             |
| 113 | AJ223352  | HIST1H2BK | 19 | 8 | 0.9999988434 | Histone 1, H2bk                                                                                    |
| 114 | D85131    | MAZ       | 19 | 8 | 0.9999988269 | MYC-associated zinc finger protein (purine-binding transcription factor)                           |
| 115 | NM_005941 | MMP16     | 19 | 5 | 0.9999987801 | Matrix metalloproteinase 16 (membrane-inserted)                                                    |
| 116 | NM_006406 | PRDX4     | 18 | 8 | 0.9999987031 | Peroxiredoxin 4                                                                                    |
| 117 | NM_006082 | K-ALPHA-1 | 18 | 8 | 0.9999986814 | Dehydrin (ERD10)                                                                                   |
| 118 | D17169    |           | 19 | 5 | 0.9999986789 | Data not found                                                                                     |
| 119 | D16856    | SERPINA1  | 19 | 8 | 0.9999986567 | Serine (or cysteine) proteinase inhibitor, clade A (alpha-1 antiproteinase, antitrypsin), member 1 |
| 120 | NM_001814 | CTSC      | 18 | 8 | 0.9999985929 | Cathepsin C                                                                                        |
| 121 | NM_000384 | APOB      | 16 | 6 | 0.9999985561 | Apolipoprotein B (including Ag(x) antigen)                                                         |
| 122 | D29810    | DCBLD2    | 19 | 8 | 0.9999984792 | Discoidin, CUB and LCCL domain containing 2                                                        |
| 123 | NM_001219 | CALU      | 19 | 8 | 0.9999984289 | Calumenin                                                                                          |
| 124 | AL110262  | NCBP2     | 19 | 8 | 0.9999984058 | Nuclear cap binding protein subunit 2, 20kDa                                                       |
| 125 | NM_016176 | Cab45     | 19 | 8 | 0.9999983847 | Stromal cell derived factor 4                                                                      |
| 126 | NM_005720 | ARPC1B    | 19 | 8 | 0.9999983457 | Actin related protein 2/3 complex, subunit 1B, 41kDa                                               |
| 127 | M17017    | IL8       | 18 | 8 | 0.9999982768 | Interleukin 8                                                                                      |
| 128 | AK001362  | DCBLD2    | 18 | 7 | 0.9999980886 | Discoidin, CUB and LCCL domain containing 2                                                        |
| 129 | NM_002317 | LOX       | 19 | 8 | 0.9999980805 | Lysyl oxidase                                                                                      |
| 130 | D17220    |           | 19 | 8 | 0.9999979399 | Data not found                                                                                     |

|     |           |           |    |   |              |                                                                                                              |
|-----|-----------|-----------|----|---|--------------|--------------------------------------------------------------------------------------------------------------|
| 131 | NM_006341 | MAD2L2    | 19 | 8 | 0.9999978336 | MAD2 mitotic arrest deficient-like 2 (yeast)                                                                 |
| 132 | AK023573  | 7h3       | 16 | 8 | 0.9999978222 | Synapse defective 1, Rho GTPase, homolog 1 (C. elegans)                                                      |
| 133 | NM_000071 | CBS       | 18 | 7 | 0.9999977418 | Cystathionine-beta-synthase                                                                                  |
| 134 | NM_004996 | ABCC1     | 19 | 8 | 0.9999975965 | ATP-binding cassette, sub-family C (CFTR/MRP), member 1                                                      |
| 135 | NM_002038 | G1P3      | 19 | 8 | 0.9999975814 | Interferon, alpha-inducible protein (clone IFI-6-16)                                                         |
| 136 | NM_003405 | YWHAH     | 19 | 8 | 0.9999974732 | Tyrosine 3-monooxygenase/tryptophan 5-monooxygenase activation protein, eta polypeptide                      |
| 137 | NM_005397 | PODXL     | 19 | 8 | 0.9999974490 | Podocalyxin-like                                                                                             |
| 138 | NM_002539 | ODC1      | 19 | 8 | 0.9999973594 | Ornithine decarboxylase 1                                                                                    |
| 139 | M34571    |           | 19 | 8 | 0.9999973007 | Data not found                                                                                               |
| 140 | NM_004960 | FUS       | 19 | 8 | 0.9999972771 | Fusion (involved in t(12;16) in malignant liposarcoma)                                                       |
| 141 | NM_001150 | ANPEP     | 18 | 8 | 0.9999972333 | Alanyl (membrane) aminopeptidase (aminopeptidase N, aminopeptidase M, microsomal aminopeptidase, CD13, p150) |
| 142 | NM_004217 | AURKB     | 19 | 8 | 0.9999972201 | Aurora kinase B                                                                                              |
| 143 | NM_002860 | ALDH18A1  | 19 | 8 | 0.9999970609 | Aldehyde dehydrogenase 18 family, member A1                                                                  |
| 144 | M38449    | TGFB1     | 19 | 8 | 0.9999970581 | Transforming growth factor, beta 1 (Camurati-Engelmann disease)                                              |
| 145 | X15804    | ACTN1     | 19 | 8 | 0.9999970514 | Actinin, alpha 1                                                                                             |
| 146 | NM_006547 | IMP-3     | 19 | 6 | 0.9999968445 | IGF-II mRNA-binding protein 3                                                                                |
| 147 | AF289028  | ICOSLG    | 19 | 8 | 0.9999968328 | Inducible T-cell co-stimulator ligand                                                                        |
| 148 | NM_006703 | NUDT3     | 19 | 8 | 0.9999967280 | Nudix (nucleoside diphosphate linked moiety X)-type motif 3                                                  |
| 149 | NM_003249 | THOP1     | 19 | 8 | 0.9999966752 | Thimet oligopeptidase 1                                                                                      |
| 150 | NM_004587 | RRBP1     | 19 | 8 | 0.9999966122 | Ribosome binding protein 1 homolog 180kDa (dog)                                                              |
| 151 | NM_001786 | CDC2      | 19 | 8 | 0.9999964903 | Cell division cycle 2, G1 to S and G2 to M                                                                   |
| 152 | AK022215  | C14orf120 | 19 | 8 | 0.9999964146 | Chromosome 14 open reading frame 120                                                                         |
| 153 | NM_000064 | C3        | 18 | 8 | 0.9999961256 | Complement component 3                                                                                       |
| 154 | NM_003932 | ST13      | 19 | 8 | 0.9999960077 | Suppression of tumorigenicity 13 (colon carcinoma) (Hsp70 interacting protein)                               |
| 155 | AF026923  | IGLC2     | 19 | 8 | 0.9999956117 | Immunoglobulin lambda joining 3                                                                              |
| 156 | NM_001728 | BSG       | 19 | 8 | 0.9999955796 | Basigin (OK blood group)                                                                                     |
| 157 | NM_001875 | CPS1      | 13 | 7 | 0.9999954241 | Carbamoyl-phosphate synthetase 1, mitochondrial                                                              |
| 158 | AK025982  | GLT25D1   | 19 | 8 | 0.9999953254 | Glycosyltransferase 25 domain containing 1                                                                   |
| 159 | AK024429  | PLEKHG2   | 18 | 7 | 0.9999950281 | Pleckstrin homology domain containing, family G (with RhoGef domain) member 2                                |
| 160 | NM_001096 | ACLY      | 19 | 8 | 0.9999950254 | ATP citrate lyase                                                                                            |
| 161 | M62403    | IGFBP4    | 19 | 8 | 0.9999949888 | Insulin-like growth factor binding protein 4                                                                 |
| 162 | M95929    |           | 19 | 8 | 0.9999949608 | Data not found                                                                                               |
| 163 | NM_002522 | NPTX1     | 13 | 7 | 0.9999948066 | Neuronal pentraxin I                                                                                         |

|     |           |          |           |   |              |                                                                                                                       |
|-----|-----------|----------|-----------|---|--------------|-----------------------------------------------------------------------------------------------------------------------|
| 164 | S76984    |          | 19        | 8 | 0.9999946170 | Data not found                                                                                                        |
| 165 | U44954    |          | 19        | 8 | 0.9999945687 | Data not found                                                                                                        |
| 166 | AK025615  | BCAT1    | 14        | 7 | 0.9999945595 | Branched chain aminotransferase 1, cytosolic                                                                          |
| 167 | M96577    | E2F1     | 19        | 8 | 0.9999945538 | E2F transcription factor 1                                                                                            |
| 168 | AK025697  | FBXO45   | 19        | 8 | 0.9999945043 | F-box protein 45                                                                                                      |
| 169 | AK022950  | C9orf76  | 19        | 8 | 0.9999944690 | Chromosome 9 open reading frame 76                                                                                    |
| 170 | NM_002743 | PRKCSH   | 18        | 8 | 0.9999944632 | Protein kinase C substrate 80K-H                                                                                      |
| 171 | NM_005787 | ALG3     | 18        | 8 | 0.9999944168 | Asparagine-linked glycosylation 3 homolog (yeast, alpha-1,3-mannosyltransferase)                                      |
| 172 | U62822    | CLASP1   | 19        | 8 | 0.9999942976 | Cytoplasmic linker associated protein 1                                                                               |
| 173 | NM_006640 |          | 09-Sep 19 | 8 | 0.9999940568 | Septin 9                                                                                                              |
| 174 | NM_017679 | BCAS3    | 19        | 8 | 0.9999936967 | Breast carcinoma amplified sequence 3                                                                                 |
| 175 | X03324    | APOB     | 19        | 8 | 0.9999936022 | Apolipoprotein B (including Ag(x) antigen)                                                                            |
| 176 | NM_002136 | HNRPA1   | 19        | 8 | 0.9999935873 | Heterogeneous nuclear ribonucleoprotein A1                                                                            |
| 177 | NM_001216 | CA9      | 15        | 8 | 0.9999935660 | Carbonic anhydrase IX                                                                                                 |
| 178 | NM_000041 | APOE     | 18        | 8 | 0.9999935541 | Apolipoprotein E                                                                                                      |
| 179 | AF075110  | C14orf4  | 19        | 8 | 0.9999935075 | Chromosome 14 open reading frame 4                                                                                    |
| 180 | NM_004864 | GDF15    | 16        | 7 | 0.9999932881 | Growth differentiation factor 15                                                                                      |
| 181 | NM_006350 | FST      | 19        | 8 | 0.9999932691 | Follistatin                                                                                                           |
| 182 | NM_000889 | ITGB7    | 19        | 8 | 0.9999932513 | Integrin, beta 7                                                                                                      |
| 183 | NM_004454 | ETV5     | 19        | 8 | 0.9999930379 | Ets variant gene 5 (ets-related molecule)                                                                             |
| 184 | AF200348  | D2S448   | 18        | 8 | 0.9999925687 | Peroxidasin homolog (Drosophila)                                                                                      |
| 185 | NM_013328 | PYCR2    | 19        | 8 | 0.9999925686 | Pyrroline-5-carboxylate reductase family, member 2                                                                    |
| 186 | U73377    |          | 17        | 8 | 0.9999922263 | Data not found                                                                                                        |
| 187 | AF070552  | CDT1     | 19        | 7 | 0.9999921229 | DNA replication factor                                                                                                |
| 188 | NM_003472 | DEK      | 19        | 8 | 0.9999920427 | DEK oncogene (DNA binding)                                                                                            |
| 189 | J03210    | MMP2     | 19        | 8 | 0.9999919459 | Matrix metalloproteinase 2 (gelatinase A, 72kDa gelatinase, 72kDa type IV collagenase)                                |
| 190 | NM_012151 | F8A1     | 19        | 8 | 0.9999915500 | Coagulation factor VIII-associated (intronic transcript) 1                                                            |
| 191 | NM_007353 | GNA12    | 19        | 7 | 0.9999912352 | Guanine nucleotide binding protein (G protein) alpha 12                                                               |
| 192 | NM_002421 | MMP1     | 18        | 8 | 0.9999912135 | Matrix metalloproteinase 1 (interstitial collagenase)                                                                 |
| 193 | U08853    | NFE2L1   | 18        | 7 | 0.9999911299 | Nuclear factor (erythroid-derived 2)-like 1                                                                           |
| 194 | NM_004336 | BUB1     | 19        | 8 | 0.9999908448 | BUB1 budding uninhibited by benzimidazoles 1 homolog (yeast)                                                          |
| 195 | NM_002615 | SERPINF1 | 18        | 7 | 0.9999906008 | Serine (or cysteine) proteinase inhibitor, clade F (alpha-2 antiplasmin, pigment epithelium derived factor), member 1 |
| 196 | NM_018664 | SNFT     | 19        | 8 | 0.9999905516 | Jun dimerization protein p21SNFT                                                                                      |

|     |           |          |    |   |              |                                                                                                    |
|-----|-----------|----------|----|---|--------------|----------------------------------------------------------------------------------------------------|
| 197 | NM_002689 | POLA2    | 19 | 8 | 0.9999901406 | Polymerase (DNA directed), alpha 2 (70kD subunit)                                                  |
| 198 | NM_006409 | ARPC1A   | 19 | 8 | 0.9999900815 | Actin related protein 2/3 complex, subunit 1A, 41kDa                                               |
| 199 | NM_014877 | HELZ     | 19 | 8 | 0.9999899646 | Helicase with zinc finger                                                                          |
| 200 | AL117423  | CBARA1   | 19 | 8 | 0.9999894643 | Calcium binding atopy-related autoantigen 1                                                        |
| 201 | NM_005953 | MT2A     | 19 | 8 | 0.9999894340 | Metallothionein 2A                                                                                 |
| 202 | NM_004595 | SMS      | 19 | 8 | 0.9999894152 | Spermine synthase                                                                                  |
| 203 | NM_002295 | LAMR1    | 19 | 8 | 0.9999893494 | Ribosomal protein SA                                                                               |
| 204 | NM_016397 | TH1L     | 19 | 8 | 0.9999888931 | TH1-like (Drosophila)                                                                              |
| 205 | NM_005080 | XBP1     | 18 | 8 | 0.9999885856 | X-box binding protein 1                                                                            |
| 206 | AK023836  | KIAA1404 | 19 | 8 | 0.9999878643 | KIAA1404 protein                                                                                   |
| 207 | NM_005983 | SKP2     | 19 | 8 | 0.9999874544 | S-phase kinase-associated protein 2 (p45)                                                          |
| 208 | NM_001085 | SERPINA3 | 19 | 6 | 0.9999872279 | Serine (or cysteine) proteinase inhibitor, clade A (alpha-1 antiproteinase, antitrypsin), member 3 |
| 209 | NM_006721 | ADK      | 19 | 8 | 0.9999872272 | Adenosine kinase                                                                                   |
| 210 | NM_002337 | LRPAP1   | 19 | 8 | 0.9999871861 | Low density lipoprotein receptor-related protein associated protein 1                              |
| 211 | NM_006600 | NUDC     | 19 | 8 | 0.9999865861 | Nuclear distribution gene C homolog (A. nidulans)                                                  |
| 212 | NM_005321 | HIST1H1E | 19 | 7 | 0.9999864136 | Histone 1, H1e                                                                                     |
| 213 | X91195    | PPP1R14B | 19 | 8 | 0.9999861412 | Protein phosphatase 1, regulatory (inhibitor) subunit 14B                                          |
| 214 | NM_014383 | TZFP     | 18 | 8 | 0.9999861193 | Testis zinc finger protein                                                                         |
| 215 | NM_012177 | FBXO5    | 19 | 8 | 0.9999859616 | F-box protein 5                                                                                    |
| 216 | M59040    | CD44     | 18 | 8 | 0.9999859594 | CD44 antigen (homing function and Indian blood group system)                                       |
| 217 | NM_005796 | NUTF2    | 19 | 8 | 0.9999856267 | Nuclear transport factor 2                                                                         |
| 218 | M87943    |          | 19 | 8 | 0.9999855282 | Data not found                                                                                     |
| 219 | NM_003247 | THBS2    | 18 | 8 | 0.9999851948 | Thrombospondin 2                                                                                   |
| 220 | NM_005281 | GPR3     | 19 | 6 | 0.9999850449 | G protein-coupled receptor 3                                                                       |
| 221 | NM_004472 | FOXD1    | 19 | 8 | 0.9999845671 | Forkhead box D1                                                                                    |
| 222 | NM_006317 | BASP1    | 19 | 8 | 0.9999845342 | Brain abundant, membrane attached signal protein 1                                                 |
| 223 | NM_013388 | PREB     | 19 | 8 | 0.9999843328 | Prolactin regulatory element binding                                                               |
| 224 | NM_000224 | KRT18    | 19 | 8 | 0.9999842325 | Keratin 18                                                                                         |
| 225 | AK025860  | FSTL1    | 18 | 8 | 0.9999840281 | Follistatin-like 1                                                                                 |
| 226 | NM_014426 | SNX5     | 19 | 8 | 0.9999840028 | Sorting nexin 5                                                                                    |
| 227 | NM_005096 | ZNF261   | 19 | 8 | 0.9999839555 | Zinc finger protein 261                                                                            |
| 228 | NM_018396 | METTL2   | 19 | 8 | 0.9999832325 | Methyltransferase like 2                                                                           |
| 229 | Z36874    |          | 19 | 8 | 0.9999831987 | Data not found                                                                                     |

|     |           |           |    |   |              |                                                                            |
|-----|-----------|-----------|----|---|--------------|----------------------------------------------------------------------------|
| 230 | NM_014783 | ARHGAP11A | 19 | 8 | 0.9999831985 | Rho GTPase activating protein 11A                                          |
| 231 | NM_000778 | CYP4A11   | 19 | 8 | 0.9999830720 | Cytochrome P450, family 4, subfamily A, polypeptide 11                     |
| 232 | NM_001394 | DUSP4     | 18 | 8 | 0.9999826224 | Dual specificity phosphatase 4                                             |
| 233 | NM_003836 | DLK1      | 17 | 6 | 0.9999820615 | Delta-like 1 homolog (Drosophila)                                          |
| 234 | D55716    | MCM7      | 18 | 8 | 0.9999820573 | MCM7 minichromosome maintenance deficient 7 ( <i>S. cerevisiae</i> )       |
| 235 | AF130077  | ALB       | 16 | 6 | 0.9999818612 | Albumin                                                                    |
| 236 | NM_014132 |           | 19 | 8 | 0.9999817571 | Data not found                                                             |
| 237 | NM_002901 | RCN1      | 19 | 8 | 0.9999815741 | Reticulocalbin 1, EF-hand calcium binding domain                           |
| 238 | NM_004501 | HNRPU     | 19 | 8 | 0.9999814765 | Heterogeneous nuclear ribonucleoprotein U (scaffold attachment factor A)   |
| 239 | NM_012117 | CBX5      | 19 | 8 | 0.9999809554 | Chromobox homolog 5 (HP1 alpha homolog, <i>Drosophila</i> )                |
| 240 | AJ002969  |           | 19 | 8 | 0.9999808534 | Data not found                                                             |
| 241 | NM_000592 | C4A       | 18 | 8 | 0.9999804116 | Complement component 4A                                                    |
| 242 | NM_007036 | ESM1      | 18 | 8 | 0.9999792432 | Endothelial cell-specific molecule 1                                       |
| 243 | NM_018579 | MSCP      | 19 | 8 | 0.9999776953 | Solute carrier family 25, member 37                                        |
| 244 | NM_017760 | MTB       | 19 | 8 | 0.9999776636 | Leucine zipper protein 5                                                   |
| 245 | D87119    | TRIB2     | 18 | 8 | 0.9999764550 | Tribbles homolog 2 ( <i>Drosophila</i> )                                   |
| 246 | AK025709  | C14orf173 | 19 | 7 | 0.9999764166 | Chromosome 14 open reading frame 173                                       |
| 247 | NM_003916 | AP1S2     | 19 | 8 | 0.9999761179 | Adaptor-related protein complex 1, sigma 2 subunit                         |
| 248 | NM_001553 | IGFBP7    | 19 | 8 | 0.9999759385 | Insulin-like growth factor binding protein 7                               |
| 249 | NM_005526 | HSF1      | 19 | 8 | 0.9999752855 | Heat shock transcription factor 1                                          |
| 250 | AB040900  | KIAA1467  | 19 | 8 | 0.9999752143 | KIAA1467 protein                                                           |
| 251 | AK026317  | LOC124245 | 19 | 8 | 0.9999751547 | Hypothetical protein BC001584                                              |
| 252 | NM_006086 | TUBB3     | 17 | 8 | 0.9999747282 | Tubulin, beta 3                                                            |
| 253 | NM_005845 | ABCC4     | 19 | 8 | 0.9999746898 | ATP-binding cassette, sub-family C (CFTR/MRP), member 4                    |
| 254 | NM_004148 | NINJ1     | 19 | 8 | 0.9999744093 | Ninjurin 1                                                                 |
| 255 | NM_005825 | RASGRP2   | 17 | 8 | 0.9999744029 | RAS guanyl releasing protein 2 (calcium and DAG-regulated)                 |
| 256 | AB043007  | SDF2L1    | 18 | 8 | 0.9999743279 | Stromal cell-derived factor 2-like 1                                       |
| 257 | NM_005438 | FOSL1     | 19 | 8 | 0.9999740074 | FOS-like antigen 1                                                         |
| 258 | NM_005837 | POP7      | 19 | 8 | 0.9999739532 | Processing of precursor 7, ribonuclease P subunit ( <i>S. cerevisiae</i> ) |
| 259 | NM_000269 | NME1      | 19 | 8 | 0.9999739065 | Non-metastatic cells 1, protein (NM23A) expressed in                       |
| 260 | NM_018092 | NETO2     | 19 | 8 | 0.9999736953 | Neuropilin (NRP) and tolloid (TLL)-like 2                                  |
| 261 | NM_017888 | FLJ20581  | 19 | 8 | 0.9999735901 | Hypothetical protein FLJ20581                                              |
| 262 | L47668    | COL1A2    | 16 | 8 | 0.9999728020 | Collagen, type I, alpha 2                                                  |



|     |           |              |    |   |              |                                                                                                                    |
|-----|-----------|--------------|----|---|--------------|--------------------------------------------------------------------------------------------------------------------|
| 263 | NM_001569 | IRAK1        | 19 | 8 | 0.9999720241 | Interleukin-1 receptor-associated kinase 1                                                                         |
| 264 | D42055    | NEDD4        | 19 | 8 | 0.9999717560 | Neural precursor cell expressed, developmentally down-regulated 4                                                  |
| 265 | X07979    |              | 18 | 8 | 0.9999716400 | Data not found                                                                                                     |
| 266 | NM_007317 | KIF22        | 19 | 8 | 0.9999711068 | Kinesin family member 22                                                                                           |
| 267 | NM_001894 | CSNK1E       | 19 | 8 | 0.9999708850 | Casein kinase 1, epsilon                                                                                           |
| 268 | AK022790  | MBC2         | 18 | 8 | 0.9999706744 | Family with sequence similarity 62 (C2 domain containing), member A                                                |
| 269 | D28446    | KRT8         | 19 | 8 | 0.9999703323 | Keratin 8                                                                                                          |
| 270 | X15881    |              | 19 | 7 | 0.9999702282 | Data not found                                                                                                     |
| 271 | AK021860  |              | 19 | 8 | 0.9999699588 | Data not found                                                                                                     |
| 272 | AK025585  | DKFZp727A071 | 19 | 8 | 0.9999698689 | Prolyl-tRNA synthetase (mitochondrial)(putative)                                                                   |
| 273 | NM_002592 | PCNA         | 19 | 8 | 0.9999698208 | Proliferating cell nuclear antigen                                                                                 |
| 274 | NM_002266 | KPNA2        | 19 | 8 | 0.9999696912 | Karyopherin alpha 2 (RAG cohort 1, importin alpha 1)                                                               |
| 275 | AF130060  |              | 19 | 8 | 0.9999695540 | Data not found                                                                                                     |
| 276 | NM_005087 | FXR1         | 18 | 8 | 0.9999691599 | Fragile X mental retardation, autosomal homolog 1                                                                  |
| 277 | NM_003937 | KYNU         | 19 | 8 | 0.9999691355 | Kynureninase (L-kynurenine hydrolase)                                                                              |
| 278 | NM_000094 | COL7A1       | 19 | 8 | 0.9999690899 | Collagen, type VII, alpha 1 (epidermolysis bullosa, dystrophic, dominant and recessive)                            |
| 279 | NM_006819 | STIP1        | 19 | 8 | 0.9999689120 | Stress-induced-phosphoprotein 1 (Hsp70/Hsp90-organizing protein)                                                   |
| 280 | NM_006892 | DNMT3B       | 19 | 8 | 0.9999687544 | DNA (cytosine-5-)-methyltransferase 3 beta                                                                         |
| 281 | NM_006644 | HSPH1        | 18 | 8 | 0.9999684316 | Heat shock 105kDa/110kDa protein 1                                                                                 |
| 282 | NM_003762 | VAMP4        | 18 | 8 | 0.9999677399 | Vesicle-associated membrane protein 4                                                                              |
| 283 | NM_004375 | COX11        | 19 | 8 | 0.9999665877 | COX11 homolog, cytochrome c oxidase assembly protein (yeast)                                                       |
| 284 | NM_000358 | TGFBI        | 19 | 8 | 0.9999663617 | Transforming growth factor, beta-induced, 68kDa                                                                    |
| 285 | NM_006904 | PRKDC        | 19 | 8 | 0.9999651125 | Protein kinase, DNA-activated, catalytic polypeptide                                                               |
| 286 | NM_006751 | SSFA2        | 19 | 8 | 0.9999646361 | Sperm specific antigen 2                                                                                           |
| 287 | NM_001111 | ADAR         | 18 | 8 | 0.9999639113 | Adenosine deaminase, RNA-specific                                                                                  |
| 288 | NM_001929 | DGUOK        | 19 | 8 | 0.9999637887 | Deoxyguanosine kinase                                                                                              |
| 289 | X82545    | PRNP         | 19 | 8 | 0.9999634396 | Prion protein (p27-30) (Creutzfeld-Jakob disease, Gerstmann-Strausler-Scheinker syndrome, fatal familial insomnia) |
| 290 | NM_014380 | NGFRAP1      | 18 | 8 | 0.9999628899 | Nerve growth factor receptor (TNFRSF16) associated protein 1                                                       |
| 291 | AY007131  | MARCKSL1     | 18 | 8 | 0.9999623638 | MARCKS-like 1                                                                                                      |
| 292 | NM_001067 | TOP2A        | 18 | 8 | 0.9999619710 | Topoisomerase (DNA) II alpha 170kDa                                                                                |
| 293 | NM_002906 | RDX          | 17 | 8 | 0.9999618087 | Radixin                                                                                                            |
| 294 | NM_003881 | WISP2        | 18 | 7 | 0.9999610769 | WNT1 inducible signaling pathway protein 2                                                                         |
| 295 | NM_001975 | ENO2         | 19 | 8 | 0.9999609173 | Enolase 2 (gamma, neuronal)                                                                                        |

|     |           |          |    |   |              |                                                                                                  |
|-----|-----------|----------|----|---|--------------|--------------------------------------------------------------------------------------------------|
| 296 | AB011114  | SFI1     | 18 | 8 | 0.9999608102 | Sfi1 homolog, spindle assembly associated (yeast)                                                |
| 297 | NM_006693 | CPSF4    | 19 | 8 | 0.9999599055 | Cleavage and polyadenylation specific factor 4, 30kDa                                            |
| 298 | NM_003784 | SERPINB7 | 18 | 8 | 0.9999597543 | Serine (or cysteine) proteinase inhibitor, clade B (ovalbumin), member 7                         |
| 299 | NM_005319 | HIST1H1C | 18 | 8 | 0.9999590332 | Histone 1, H1c                                                                                   |
| 300 | NM_001711 | BGN      | 19 | 7 | 0.9999577923 | Biglycan                                                                                         |
| 301 | NM_006332 | IFI30    | 19 | 8 | 0.9999571554 | Interferon, gamma-inducible protein 30                                                           |
| 302 | NM_003902 | FUBP1    | 19 | 8 | 0.9999562865 | Far upstream element (FUSE) binding protein 1                                                    |
| 303 | NM_000302 | PLOD1    | 19 | 8 | 0.9999549185 | Procollagen-lysine 1, 2-oxoglutarate 5-dioxygenase 1                                             |
| 304 | AF040723  | HAP1     | 19 | 8 | 0.9999544866 | Huntingtin-associated protein 1 (neuroan 1)                                                      |
| 305 | NM_017867 | FLJ20534 | 19 | 8 | 0.9999543271 | Hypothetical protein FLJ20534                                                                    |
| 306 | NM_003095 | SNRPF    | 18 | 8 | 0.9999539248 | Small nuclear ribonucleoprotein polypeptide F                                                    |
| 307 | NM_016546 | C1RL     | 19 | 8 | 0.9999520302 | Complement component 1, r subcomponent-like                                                      |
| 308 | NM_013344 |          | 19 | 8 | 0.9999514166 | Data not found                                                                                   |
| 309 | NM_014690 | KIAA0773 | 18 | 8 | 0.9999512280 | KIAA0773 gene product                                                                            |
| 310 | NM_003254 | TIMP1    | 19 | 8 | 0.9999506409 | Tissue inhibitor of metalloproteinase 1 (erythroid potentiating activity, collagenase inhibitor) |
| 311 | NM_013307 |          | 19 | 8 | 0.9999500318 | Data not found                                                                                   |
| 312 | NM_002164 | INDO     | 17 | 6 | 0.9999494656 | Indoleamine-pyrrole 2,3 dioxygenase                                                              |
| 313 | AB018260  | RHOBTB2  | 18 | 8 | 0.9999491727 | Rho-related BTB domain containing 2                                                              |
| 314 | AB011157  | PTDSR    | 17 | 7 | 0.9999452207 | Phosphatidylserine receptor                                                                      |
| 315 | U12210    |          | 15 | 8 | 0.9999451609 | Data not found                                                                                   |
| 316 | AK026068  | ASAM     | 19 | 8 | 0.9999451488 | Adipocyte-specific adhesion molecule                                                             |
| 317 | NM_002628 | PFN2     | 19 | 8 | 0.9999443442 | Profilin 2                                                                                       |
| 318 | NM_004357 | CD151    | 19 | 8 | 0.9999434480 | CD151 antigen                                                                                    |
| 319 | NM_001605 | AARS     | 19 | 8 | 0.9999432839 | Alanyl-tRNA synthetase                                                                           |
| 320 | AK000160  | MYO1B    | 18 | 8 | 0.9999432460 | Myosin IB                                                                                        |
| 321 | NM_007019 | UBE2C    | 15 | 8 | 0.9999428546 | Ubiquitin-conjugating enzyme E2C                                                                 |
| 322 | NM_005576 | LOXL1    | 19 | 8 | 0.9999426355 | Lysyl oxidase-like 1                                                                             |
| 323 | NM_019108 | FLJ12886 | 19 | 6 | 0.9999413246 | Hypothetical protein FLJ12886                                                                    |
| 324 | NM_000093 | COL5A1   | 17 | 7 | 0.9999390461 | Collagen, type V, alpha 1                                                                        |
| 325 | NM_018110 | DOK4     | 17 | 7 | 0.9999361096 | Docking protein 4                                                                                |
| 326 | NM_016539 | SIRT6    | 18 | 8 | 0.9999356906 | Sirtuin (silent mating type information regulation 2 homolog) 6 ( <i>S. cerevisiae</i> )         |
| 327 | NM_006717 | SPIN     | 19 | 7 | 0.9999356635 | Spindlin                                                                                         |
| 328 | NM_002475 | MLC1SA   | 17 | 8 | 0.9999334854 | Myosin light chain 1 slow a                                                                      |

|     |           |           |    |   |              |                                                                                                                   |
|-----|-----------|-----------|----|---|--------------|-------------------------------------------------------------------------------------------------------------------|
| 329 | AF218008  |           | 16 | 8 | 0.9999333240 | Chromosome 19 open reading frame 28                                                                               |
| 330 | AK025583  | SORL1     | 19 | 8 | 0.9999321995 | Chromosome 11 open reading frame 32                                                                               |
| 331 | NM_001120 | TETRA1    | 19 | 8 | 0.9999321037 | Chromosome 4 open reading frame 10                                                                                |
| 332 | NM_004349 | RUNX1T1   | 16 | 5 | 0.9999295996 | Runt-related transcription factor 1; translocated to, 1 (cyclin D-related)                                        |
| 333 | NM_016947 | C6orf48   | 19 | 8 | 0.9999288399 | Chromosome 6 open reading frame 48                                                                                |
| 334 | NM_012147 |           | 19 | 8 | 0.9999274691 | Data not found                                                                                                    |
| 335 | L77591    |           | 19 | 8 | 0.9999265809 | Data not found                                                                                                    |
| 336 | NM_017797 | BTBD2     | 19 | 8 | 0.9999253191 | BTB (POZ) domain containing 2                                                                                     |
| 337 | NM_016069 | Magmas    | 19 | 7 | 0.9999252522 | Mitochondria-associated protein involved in granulocyte-macrophage colony-stimulating factor signal transduction  |
| 338 | NM_001901 | CTGF      | 19 | 6 | 0.9999251470 | Connective tissue growth factor                                                                                   |
| 339 | AL137332  | DRCTNNB1A | 18 | 7 | 0.9999248767 | Down-regulated by Ctnnb1, a                                                                                       |
| 340 | AF035288  | BHLHB9    | 17 | 7 | 0.9999246242 | Basic helix-loop-helix domain containing, class B, 9                                                              |
| 341 | Z36803    |           | 18 | 8 | 0.9999233646 | Data not found                                                                                                    |
| 342 | NM_000310 | PPT1      | 19 | 8 | 0.9999232037 | Palmitoyl-protein thioesterase 1 (ceroid-lipofuscinosis, neuronal 1, infantile)                                   |
| 343 | NM_002799 | PSMB7     | 18 | 8 | 0.9999200409 | Proteasome (prosome, macropain) subunit, beta type, 7                                                             |
| 344 | NM_000819 | GART      | 19 | 8 | 0.9999191588 | Phosphoribosylglycinamide formyltransferase, phosphoribosylglycinamide synthetase, phosphoribosylaminoimidazole s |
| 345 | NM_015989 | CSAD      | 19 | 8 | 0.9999182726 | Cysteine sulfinic acid decarboxylase                                                                              |
| 346 | X04547    |           | 17 | 5 | 0.9999163782 | Data not found                                                                                                    |
| 347 | NM_004772 | C5orf13   | 18 | 8 | 0.9999151439 | Chromosome 5 open reading frame 13                                                                                |
| 348 | NM_004568 | SERPINB6  | 19 | 8 | 0.9999146882 | Serine (or cysteine) proteinase inhibitor, clade B (ovalbumin), member 6                                          |
| 349 | NM_014795 | ZFHX1B    | 17 | 7 | 0.9999137481 | Zinc finger homeobox 1b                                                                                           |
| 350 | NM_002945 | RPA1      | 19 | 8 | 0.9999128231 | Replication protein A1, 70kDa                                                                                     |
| 351 | AK022745  |           | 14 | 7 | 0.9999127784 | RNA, U71A small nucleolar                                                                                         |
| 352 | AK024639  | ATP13A3   | 19 | 8 | 0.9999114062 | ATPase type 13A3                                                                                                  |
| 353 | NM_014875 | KIF14     | 18 | 8 | 0.9999105373 | Kinesin family member 14                                                                                          |
| 354 | U41387    | DDX21     | 19 | 8 | 0.9999091680 | DEAD (Asp-Glu-Ala-Asp) box polypeptide 21                                                                         |
| 355 | AK001814  | CEBPZ     | 17 | 8 | 0.9999079172 | CCAAT/enhancer binding protein zeta                                                                               |
| 356 | NM_007147 | ZNF175    | 19 | 8 | 0.9999056244 | Zinc finger protein 175                                                                                           |
| 357 | NM_006810 | PDIR      | 19 | 8 | 0.9999051536 | Protein disulfide isomerase family A, member 5                                                                    |
| 358 | S68954    |           | 19 | 8 | 0.9999027490 | Data not found                                                                                                    |
| 359 | NM_000397 | CYBB      | 19 | 8 | 0.9999016832 | Cytochrome b-245, beta polypeptide (chronic granulomatous disease)                                                |
| 360 | NM_012267 | HSPBP1    | 17 | 8 | 0.9998984247 | Hsp70-interacting protein                                                                                         |
| 361 | AF185573  | MYOM1     | 19 | 8 | 0.9998970703 | Myomesin 1 (skelemin) 185kDa                                                                                      |

|     |           |               |    |   |              |                                                                                                     |
|-----|-----------|---------------|----|---|--------------|-----------------------------------------------------------------------------------------------------|
| 362 | NM_014907 | FRMPD1        | 18 | 8 | 0.9998968239 | FERM and PDZ domain containing 1                                                                    |
| 363 | AK025985  | FLJ35036      | 19 | 8 | 0.9998940367 | Zinc finger and BTB domain containing 38                                                            |
| 364 | U77700    | GCN1L1        | 19 | 8 | 0.9998931742 | GCN1 general control of amino-acid synthesis 1-like 1 (yeast)                                       |
| 365 | NM_003489 | NRIP1         | 19 | 8 | 0.9998929638 | Nuclear receptor interacting protein 1                                                              |
| 366 | NM_002947 | RPA3          | 18 | 7 | 0.9998917008 | Replication protein A3, 14kDa                                                                       |
| 367 | NM_002654 | PKM2          | 19 | 8 | 0.9998910678 | Pyruvate kinase, muscle                                                                             |
| 368 | NM_002105 | H2AFX         | 19 | 8 | 0.9998906533 | H2A histone family, member X                                                                        |
| 369 | NM_004184 | WARS          | 19 | 8 | 0.9998892683 | Tryptophanyl-tRNA synthetase                                                                        |
| 370 | NM_018202 | FLJ10747      | 19 | 8 | 0.9998889583 | Transmembrane protein 57                                                                            |
| 371 | NM_001673 | ASNS          | 19 | 8 | 0.9998862543 | Asparagine synthetase                                                                               |
| 372 | AK026331  | CHPF          | 19 | 8 | 0.9998855823 | Chondroitin polymerizing factor                                                                     |
| 373 | NM_016518 | PIPOX         | 18 | 8 | 0.9998849085 | Pipecolic acid oxidase                                                                              |
| 374 | NM_004399 | DDX11         | 19 | 8 | 0.9998828354 | DEAD/H (Asp-Glu-Ala-Asp/His) box polypeptide 11 (CHL1-like helicase homolog, <i>S. cerevisiae</i> ) |
| 375 | NM_016639 | TNFRSF12A     | 18 | 7 | 0.9998815848 | Tumor necrosis factor receptor superfamily, member 12A                                              |
| 376 | NM_006404 | PROCR         | 19 | 8 | 0.9998782865 | Protein C receptor, endothelial (EPCR)                                                              |
| 377 | NM_005762 | TRIM28        | 19 | 8 | 0.9998777581 | Tripartite motif-containing 28                                                                      |
| 378 | NM_003798 | CTNNA1        | 19 | 8 | 0.9998759468 | Catenin (cadherin-associated protein), alpha-like 1                                                 |
| 379 | AL080235  | RIS1          | 19 | 8 | 0.9998738835 | Ras-induced senescence 1                                                                            |
| 380 | M20777    |               | 18 | 8 | 0.9998731842 | Data not found                                                                                      |
| 381 | NM_002497 | NEK2          | 19 | 7 | 0.9998731461 | NIMA (never in mitosis gene a)-related kinase 2                                                     |
| 382 | NM_018685 | ANLN          | 19 | 8 | 0.9998719972 | Anillin, actin binding protein (scraps homolog, <i>Drosophila</i> )                                 |
| 383 | NM_018209 | ARFGAP1       | 19 | 8 | 0.9998718279 | ADP-ribosylation factor GTPase activating protein 1                                                 |
| 384 | M34572    |               | 19 | 7 | 0.9998710096 | Data not found                                                                                      |
| 385 | NM_004284 | CHD1L         | 19 | 8 | 0.9998705858 | Chromodomain helicase DNA binding protein 1-like                                                    |
| 386 | AK027013  | C16orf28      | 19 | 8 | 0.9998701385 | Chromosome 16 open reading frame 28                                                                 |
| 387 | NM_005504 | BCAT1         | 19 | 8 | 0.9998688535 | Branched chain aminotransferase 1, cytosolic                                                        |
| 388 | J03250    | TOP1          | 19 | 8 | 0.9998685052 | Topoisomerase (DNA) I                                                                               |
| 389 | NM_003522 | HIST1H2BF     | 15 | 8 | 0.9998668562 | Histone 1, H2bf                                                                                     |
| 390 | NM_001102 | ACTN1         | 19 | 8 | 0.9998658192 | Actinin, alpha 1                                                                                    |
| 391 | NM_000627 | LTBP1         | 19 | 8 | 0.9998654915 | Latent transforming growth factor beta binding protein 1                                            |
| 392 | NM_018410 | DKFZp762E1312 | 18 | 8 | 0.9998651566 | Hypothetical protein DKFZp762E1312                                                                  |
| 393 | AK026897  | RIC8          | 19 | 8 | 0.9998644912 | Likely ortholog of mouse synembryon                                                                 |
| 394 | AF131781  | FLJ12442      | 19 | 8 | 0.9998642907 | Hypothetical protein FLJ12442                                                                       |

|     |           |          |    |   |              |                                                                                         |
|-----|-----------|----------|----|---|--------------|-----------------------------------------------------------------------------------------|
| 395 | NM_003289 | TPM2     | 19 | 8 | 0.9998634667 | Tropomyosin 2 (beta)                                                                    |
| 396 | NM_019025 | SMOX     | 18 | 6 | 0.9998584758 | Spermine oxidase                                                                        |
| 397 | AB033023  | YEATS2   | 19 | 8 | 0.9998580507 | YEATS domain containing 2                                                               |
| 398 | AF085904  | RBBP4    | 19 | 5 | 0.9998576236 | Retinoblastoma binding protein 4                                                        |
| 399 | NM_007215 | POLG2    | 19 | 8 | 0.9998545403 | Polymerase (DNA directed), gamma 2, accessory subunit                                   |
| 400 | AL390181  | C21orf86 | 18 | 8 | 0.9998514296 | Chromosome 21 open reading frame 86                                                     |
| 401 | NM_002775 | PRSS11   | 19 | 8 | 0.9998499594 | Protease, serine, 11 (IGF binding)                                                      |
| 402 | AF241831  | HABP4    | 18 | 7 | 0.9998450707 | Hyaluronan binding protein 4                                                            |
| 403 | NM_002460 | IRF4     | 18 | 8 | 0.9998433266 | Interferon regulatory factor 4                                                          |
| 404 | NM_014501 | UBE2S    | 18 | 8 | 0.9998425707 | Ubiquitin-conjugating enzyme E2S                                                        |
| 405 | NM_012247 | SEPHS1   | 19 | 8 | 0.9998425649 | Selenophosphate synthetase 1                                                            |
| 406 | NM_002375 | MAP4     | 18 | 8 | 0.9998421480 | Microtubule-associated protein 4                                                        |
| 407 | NM_013241 | FHOD1    | 19 | 8 | 0.9998416910 | Formin homology 2 domain containing 1                                                   |
| 408 | NM_012413 | QPCT     | 18 | 8 | 0.9998410993 | Glutaminyl-peptide cyclotransferase (glutaminyl cyclase)                                |
| 409 | NM_007108 | TCEB2    | 19 | 8 | 0.9998390058 | Transcription elongation factor B (SIII), polypeptide 2 (18kDa, elongin B)              |
| 410 | NM_017798 | YTHDF1   | 18 | 8 | 0.9998388740 | YTH domain family, member 1                                                             |
| 411 | NM_007363 | NONO     | 16 | 8 | 0.9998378456 | Non-POU domain containing, octamer-binding                                              |
| 412 | AF216292  | HSPA5    | 18 | 8 | 0.9998343664 | Heat shock 70kDa protein 5 (glucose-regulated protein, 78kDa)                           |
| 413 | NM_002573 | PAFAH1B3 | 19 | 8 | 0.9998342546 | Platelet-activating factor acetylhydrolase, isoform Ib, gamma subunit 29kDa             |
| 414 | NM_003819 | PABPC4   | 19 | 8 | 0.9998322690 | Poly(A) binding protein, cytoplasmic 4 (inducible form)                                 |
| 415 | NM_003155 | STC1     | 19 | 8 | 0.9998311982 | Stanniocalcin 1                                                                         |
| 416 | NM_002795 | PSMB3    | 19 | 8 | 0.9998281149 | Proteasome (prosome, macropain) subunit, beta type, 3                                   |
| 417 | AB037751  | ALPK3    | 18 | 8 | 0.9998232749 | Alpha-kinase 3                                                                          |
| 418 | NM_018930 | PCDHB10  | 14 | 6 | 0.9998221416 | Protocadherin beta 10                                                                   |
| 419 | NM_015973 | GAL      | 17 | 8 | 0.9998215003 | Galanin                                                                                 |
| 420 | NM_001165 | BIRC3    | 19 | 8 | 0.9998203897 | Baculoviral IAP repeat-containing 3                                                     |
| 421 | AK021942  | PKNOX2   | 19 | 8 | 0.9998177468 | PBX/knotted 1 homeobox 2                                                                |
| 422 | NM_013235 | RNASE3L  | 19 | 8 | 0.9998163472 | Ribonuclease III, nuclear                                                               |
| 423 | NM_014262 | LEPREL2  | 19 | 7 | 0.9998153815 | Leprecan-like 2                                                                         |
| 424 | NM_017920 | URG4     | 17 | 7 | 0.9998142867 | Up-regulated gene 4                                                                     |
| 425 | AK021691  |          | 18 | 8 | 0.9998113230 | Data not found                                                                          |
| 426 | NM_002070 | GNAI2    | 17 | 8 | 0.9998107179 | Guanine nucleotide binding protein (G protein), alpha inhibiting activity polypeptide 2 |
| 427 | NM_005998 | CCT3     | 19 | 8 | 0.9998103968 | Chaperonin containing TCPI, subunit 3 (gamma)                                           |

|     |           |          |    |   |              |                                                                                                                      |
|-----|-----------|----------|----|---|--------------|----------------------------------------------------------------------------------------------------------------------|
| 428 | NM_004994 | MMP9     | 19 | 8 | 0.9998064666 | Matrix metalloproteinase 9 (gelatinase B, 92kDa gelatinase, 92kDa type IV collagenase)                               |
| 429 | NM_007129 | ZIC2     | 19 | 8 | 0.9998061290 | Zic family member 2 (odd-paired homolog, Drosophila)                                                                 |
| 430 | NM_018127 | ELAC2    | 19 | 8 | 0.9998059159 | ElaC homolog 2 (E. coli)                                                                                             |
| 431 | NM_003858 | CCNK     | 19 | 8 | 0.9998034456 | Chromosome 14 open reading frame 65                                                                                  |
| 432 | NM_000392 | ABCC2    | 19 | 8 | 0.9998031505 | ATP-binding cassette, sub-family C (CFTR/MRP), member 2                                                              |
| 433 | NM_002224 | ITPR3    | 19 | 8 | 0.9998023437 | Inositol 1,4,5-triphosphate receptor, type 3                                                                         |
| 434 | AF086148  | FLJ12986 | 19 | 8 | 0.9998015123 | Hypothetical protein FLJ12986                                                                                        |
| 435 | NM_007079 | PTP4A3   | 18 | 8 | 0.9998002218 | Protein tyrosine phosphatase type IVA, member 3                                                                      |
| 436 | NM_004044 | ATIC     | 19 | 8 | 0.9997996947 | 5-aminoimidazole-4-carboxamide ribonucleotide formyltransferase/IMP cyclohydrolase                                   |
| 437 | NM_013232 | PDCD6    | 19 | 7 | 0.9997990003 | Aryl-hydrocarbon receptor repressor                                                                                  |
| 438 | NM_000029 | AGT      | 19 | 7 | 0.9997967904 | Angiotensinogen (serine (or cysteine) proteinase inhibitor, clade A (alpha-1 antiproteinase, antitrypsin), member 8) |
| 439 | AF016903  | AGRN     | 18 | 8 | 0.9997920835 | Agtrin                                                                                                               |
| 440 | NM_014096 | SLC43A3  | 19 | 8 | 0.9997900417 | Solute carrier family 43, member 3                                                                                   |
| 441 | NM_001539 | DNAJA1   | 18 | 8 | 0.9997874053 | DnaJ (Hsp40) homolog, subfamily A, member 1                                                                          |
| 442 | NM_018441 | PECR     | 19 | 8 | 0.9997853175 | Peroxisomal trans-2-enoyl-CoA reductase                                                                              |
| 443 | NM_004484 | GPC3     | 18 | 7 | 0.9997842883 | Glypican 3                                                                                                           |
| 444 | D13642    | SF3B3    | 19 | 8 | 0.9997827667 | Splicing factor 3b, subunit 3, 130kDa                                                                                |
| 445 | AK000315  | FLJ20308 | 17 | 8 | 0.9997826181 | Hypothetical protein FLJ20308                                                                                        |
| 446 | NM_018123 |          | 18 | 8 | 0.9997821867 | Data not found                                                                                                       |
| 447 | AK025784  | MET      | 19 | 8 | 0.9997821089 | Met proto-oncogene (hepatocyte growth factor receptor)                                                               |
| 448 | NM_005687 | FARSLB   | 19 | 8 | 0.9997810320 | Phenylalanine-tRNA synthetase-like, beta subunit                                                                     |
| 449 | NM_005455 | ZNF265   | 19 | 8 | 0.9997809856 | Zinc finger protein 265                                                                                              |
| 450 | NM_018187 |          | 18 | 8 | 0.9997793429 | Data not found                                                                                                       |
| 451 | NM_002046 | GAPD     | 19 | 8 | 0.9997790161 | Glyceraldehyde-3-phosphate dehydrogenase                                                                             |
| 452 | NM_016459 | PACAP    | 19 | 8 | 0.9997768148 | Proapoptotic caspase adaptor protein                                                                                 |
| 453 | D16875    | RHOB     | 19 | 8 | 0.9997715060 | Ras homolog gene family, member B                                                                                    |
| 454 | NM_014028 | OSTM1    | 18 | 7 | 0.9997704669 | Osteopetrosis associated transmembrane protein 1                                                                     |
| 455 | NM_005867 | DSCR4    | 18 | 8 | 0.9997689356 | Down syndrome critical region gene 4                                                                                 |
| 456 | NM_007192 | SUPT16H  | 19 | 8 | 0.9997675829 | Suppressor of Ty 16 homolog (S. cerevisiae)                                                                          |
| 457 | AK024407  |          | 19 | 8 | 0.9997675049 | Data not found                                                                                                       |
| 458 | D17184    |          | 19 | 8 | 0.9997635732 | Data not found                                                                                                       |
| 459 | NM_018101 | CDCA8    | 19 | 6 | 0.9997633991 | Cell division cycle associated 8                                                                                     |
| 460 | NM_005628 | SLC1A5   | 19 | 8 | 0.9997596219 | Solute carrier family 1 (neutral amino acid transporter), member 5                                                   |

|     |           |          |    |   |              |                                                                                    |
|-----|-----------|----------|----|---|--------------|------------------------------------------------------------------------------------|
| 461 | NM_014498 | GOLPH4   | 19 | 7 | 0.9997551116 | Golgi phosphoprotein 4                                                             |
| 462 | NM_004567 | PFKFB4   | 18 | 8 | 0.9997535531 | 6-phosphofructo-2-kinase/fructose-2,6-biphosphatase 4                              |
| 463 | NM_005839 | SRRM1    | 19 | 8 | 0.9997455862 | Serine/arginine repetitive matrix 1                                                |
| 464 | NM_001071 | TYMS     | 18 | 8 | 0.9997444692 | Thymidylate synthetase                                                             |
| 465 | NM_003146 | SSRP1    | 19 | 8 | 0.9997418618 | Structure specific recognition protein 1                                           |
| 466 | X98261    | ZWINT    | 12 | 5 | 0.9997383481 | ZW10 interactor antisense                                                          |
| 467 | AF311324  | ANUBL1   | 18 | 8 | 0.9997350402 | AN1, ubiquitin-like, homolog ( <i>Xenopus laevis</i> )                             |
| 468 | NM_004693 | K6HF     | 18 | 7 | 0.9997296035 | Cytokeratin type II                                                                |
| 469 | NM_006983 | MMP23B   | 19 | 8 | 0.9997280806 | Matrix metalloproteinase 23A                                                       |
| 470 | NM_006848 | DIPA     | 19 | 8 | 0.9997273476 | Hepatitis delta antigen-interacting protein A                                      |
| 471 | NM_004207 | SLC16A3  | 19 | 8 | 0.9997267377 | Solute carrier family 16 (monocarboxylic acid transporters), member 3              |
| 472 | NM_003862 | FGF18    | 17 | 6 | 0.9997238831 | Fibroblast growth factor 18                                                        |
| 473 | NM_002300 | LDHB     | 19 | 8 | 0.9997215207 | Lactate dehydrogenase B                                                            |
| 474 | AK024734  | MTAP     | 19 | 8 | 0.9997202136 | Methylthioadenosine phosphorylase                                                  |
| 475 | NM_003749 | IRS2     | 19 | 8 | 0.9997195897 | Insulin receptor substrate 2                                                       |
| 476 | NM_007144 | PCGF2    | 17 | 7 | 0.9997195340 | Polycomb group ring finger 2                                                       |
| 477 | NM_004203 | PKMYT1   | 19 | 6 | 0.9997194363 | Protein kinase, membrane associated tyrosine/threonine 1                           |
| 478 | NM_018413 | CHST11   | 15 | 7 | 0.9997167133 | Carbohydrate (chondroitin 4) sulfotransferase 11                                   |
| 479 | NM_016200 | LSM8     | 19 | 8 | 0.9997161307 | LSM8 homolog, U6 small nuclear RNA associated ( <i>S. cerevisiae</i> )             |
| 480 | NM_002318 | LOXL2    | 19 | 8 | 0.9997158293 | Lysyl oxidase-like 2                                                               |
| 481 | X62468    | IFNG     | 17 | 5 | 0.9997105742 | Interferon, gamma                                                                  |
| 482 | AB014550  | KIAA0650 | 18 | 6 | 0.9997083745 | Structural maintenance of chromosomes flexible hinge domain containing 1           |
| 483 | NM_003258 | TK1      | 18 | 7 | 0.9997082349 | Thymidine kinase 1, soluble                                                        |
| 484 | NM_001643 | APOA2    | 17 | 8 | 0.9997073821 | Apolipoprotein A-II                                                                |
| 485 | NM_018282 | PSPC1    | 19 | 8 | 0.9997058441 | Paraspeckle component 1                                                            |
| 486 | NM_004190 | LIPF     | 19 | 8 | 0.9997041983 | Lipase, gastric                                                                    |
| 487 | NM_016625 | MGC12197 | 19 | 7 | 0.9997024409 | Arginine/serine-rich coiled-coil 1                                                 |
| 488 | AL117477  | PHF19    | 18 | 8 | 0.9997023741 | PHD finger protein 19                                                              |
| 489 | NM_012342 | BAMBI    | 18 | 8 | 0.9997011974 | BMP and activin membrane-bound inhibitor homolog ( <i>Xenopus laevis</i> )         |
| 490 | NM_015942 | CGI-12   | 19 | 8 | 0.9996966451 | MTERF domain containing 1                                                          |
| 491 | NM_005192 | CDKN3    | 19 | 8 | 0.9996952979 | Cyclin-dependent kinase inhibitor 3 (CDK2-associated dual specificity phosphatase) |
| 492 | NM_004153 | ORC1L    | 18 | 7 | 0.9996937366 | Origin recognition complex, subunit 1-like (yeast)                                 |
| 493 | M36693    | SOD2     | 18 | 8 | 0.9996912162 | Superoxide dismutase 2, mitochondrial                                              |

|     |           |          |    |   |              |                                                                         |
|-----|-----------|----------|----|---|--------------|-------------------------------------------------------------------------|
| 494 | M76676    | GPR135   | 18 | 8 | 0.9996884361 | G protein-coupled receptor 135                                          |
| 495 | NM_002951 | RPN2     | 19 | 8 | 0.9996825595 | Ribophorin II                                                           |
| 496 | X04526    |          | 18 | 8 | 0.9996824298 | Data not found                                                          |
| 497 | NM_005548 | KARS     | 19 | 7 | 0.9996786984 | Lysyl-tRNA synthetase                                                   |
| 498 | NM_003276 | TMPO     | 19 | 8 | 0.9996740489 | Thymopoietin                                                            |
| 499 | NM_005506 | SCARB2   | 18 | 8 | 0.9996720382 | Scavenger receptor class B, member 2                                    |
| 500 | NM_012288 | TRAM2    | 19 | 8 | 0.9996706216 | Translocation associated membrane protein 2                             |
| 501 | AL360136  | B7H3     | 19 | 8 | 0.9996666087 | CD276 antigen                                                           |
| 502 | AK001581  | FLJ10719 | 16 | 7 | 0.9996630939 | Hypothetical protein FLJ10719                                           |
| 503 | U80756    |          | 19 | 8 | 0.9996625337 | Data not found                                                          |
| 504 | X92185    | ORC2L    | 11 | 5 | 0.9996550939 | Origin recognition complex, subunit 2-like (yeast)                      |
| 505 | AK024174  |          | 19 | 8 | 0.9996517191 | Hypothetical LOC388969                                                  |
| 506 | L11238    | GP5      | 19 | 8 | 0.9996505062 | Glycoprotein V (platelet)                                               |
| 507 | NM_000947 | PRIM2A   | 19 | 8 | 0.9996495841 | Primase, polypeptide 2A, 58kDa                                          |
| 508 | NM_003875 | GMPS     | 19 | 8 | 0.9996495187 | Guanine monphosphate synthetase                                         |
| 509 | NM_006579 | EBP      | 19 | 8 | 0.9996489923 | Emopamil binding protein (sterol isomerase)                             |
| 510 | U79291    | PTPN11   | 17 | 8 | 0.9996485886 | Protein tyrosine phosphatase, non-receptor type 11 (Noonan syndrome 1)  |
| 511 | NM_005445 | CSPG6    | 19 | 8 | 0.9996484472 | Chondroitin sulfate proteoglycan 6 (bamacan)                            |
| 512 | NM_003296 | CRISP2   | 19 | 6 | 0.9996475364 | Cysteine-rich secretory protein 2                                       |
| 513 | NM_000301 | PLG      | 14 | 6 | 0.9996442074 | Plasminogen                                                             |
| 514 | NM_005138 | SCO2     | 18 | 8 | 0.9996425346 | SCO cytochrome oxidase deficient homolog 2 (yeast)                      |
| 515 | NM_012474 | UCK2     | 17 | 8 | 0.9996419971 | Uridine-cytidine kinase 2                                               |
| 516 | AF086184  |          | 17 | 6 | 0.9996354641 | Full length insert cDNA clone ZC30C07                                   |
| 517 | NM_016937 | POLA     | 19 | 8 | 0.9996336346 | Polymerase (DNA directed), alpha                                        |
| 518 | NM_003646 | DGKZ     | 19 | 8 | 0.9996301959 | Diacylglycerol kinase, zeta 104kDa                                      |
| 519 | NM_002950 | RPN1     | 19 | 8 | 0.9996258482 | Hypothetical protein FLJ40473                                           |
| 520 | NM_016579 | 8D6A     | 19 | 8 | 0.9996249143 | CD320 antigen                                                           |
| 521 | NM_002345 | LUM      | 19 | 8 | 0.9996244926 | Lumican                                                                 |
| 522 | NM_006303 | JTV1     | 19 | 7 | 0.9996192026 | JTV1 gene                                                               |
| 523 | AL050210  | MALAT1   | 19 | 7 | 0.9996116969 | Metastasis associated lung adenocarcinoma transcript 1 (non-coding RNA) |
| 524 | NM_004494 | HDGF     | 19 | 8 | 0.9995985089 | Hepatoma-derived growth factor (high-mobility group protein 1-like)     |
| 525 | AK027111  | RPL17    | 18 | 8 | 0.9995968698 | Ribosomal protein L17                                                   |
| 526 | NM_000393 | COL5A2   | 19 | 8 | 0.9995955135 | Collagen, type V, alpha 2                                               |



|     |           |           |    |   |              |                                                           |
|-----|-----------|-----------|----|---|--------------|-----------------------------------------------------------|
| 527 | AK026982  | C20orf98  | 17 | 7 | 0.9995948296 | Chromosome 20 open reading frame 98                       |
| 528 | NM_018446 | GLT8D1    | 19 | 8 | 0.9995924541 | Glycosyltransferase 8 domain containing 1                 |
| 529 | AK023718  | LOC145474 | 11 | 8 | 0.9995921534 | Hypothetical protein LOC145474                            |
| 530 | NM_012310 | KIF4A     | 17 | 8 | 0.9995896920 | Kinesin family member 4A                                  |
| 531 | NM_004689 | MTA1      | 19 | 8 | 0.9995882377 | Metastasis associated 1                                   |
| 532 | NM_006680 | ME3       | 16 | 8 | 0.9995857887 | Malic enzyme 3, NADP(+)-dependent, mitochondrial          |
| 533 | AK022885  | C9orf16   | 16 | 7 | 0.9995834096 | Chromosome 9 open reading frame 16                        |
| 534 | NM_003056 | SLC19A1   | 15 | 7 | 0.9995816149 | Solute carrier family 19 (folate transporter), member 1   |
| 535 | NM_002050 |           | 19 | 8 | 0.9995811980 | Data not found                                            |
| 536 | AL110257  | MGC26690  | 19 | 8 | 0.9995746672 | Hypothetical protein MGC26690                             |
| 537 | D87454    | KIAA0265  | 19 | 8 | 0.9995745895 | KIAA0265 protein                                          |
| 538 | X52882    | TCP1      | 19 | 8 | 0.9995709331 | T-complex 1                                               |
| 539 | NM_000097 | CPOX      | 19 | 8 | 0.9995700416 | Coproporphyrinogen oxidase                                |
| 540 | NM_018245 | OGDHL     | 19 | 8 | 0.9995637900 | Oxoglutarate dehydrogenase-like                           |
| 541 | NM_001827 | CKS2      | 19 | 8 | 0.9995628136 | CDC28 protein kinase regulatory subunit 2                 |
| 542 | NM_003333 | UBA52     | 19 | 8 | 0.9995585937 | Ubiquitin A-52 residue ribosomal protein fusion product 1 |
| 543 | NM_001295 | CCR1      | 19 | 8 | 0.9995556673 | Chemokine (C-C motif) receptor 1                          |
| 544 | NM_002158 | HTLF      | 17 | 8 | 0.9995483848 | Human T-cell leukemia virus enhancer factor               |
| 545 | NM_016171 |           | 16 | 8 | 0.9995452133 | Data not found                                            |
| 546 | NM_000732 | CD3D      | 19 | 8 | 0.9995425222 | CD3D antigen, delta polypeptide (TtT3 complex)            |
| 547 | NM_001316 | CSE1L     | 19 | 8 | 0.9995422619 | CSE1 chromosome segregation 1-like (yeast)                |
| 548 | NM_014847 | UBAP2L    | 18 | 8 | 0.9995420685 | Ubiquitin associated protein 2-like                       |
| 549 | AK002025  | LOC151963 | 19 | 8 | 0.9995385835 | Similar to BcDNA:GH11415 gene product                     |
| 550 | NM_016095 | Pfs2      | 19 | 8 | 0.9995382013 | DNA replication complex GINS protein PSF2                 |
| 551 | NM_006115 | PRAME     | 19 | 8 | 0.9995371565 | Preferentially expressed antigen in melanoma              |
| 552 | NM_018474 | C20orf19  | 19 | 7 | 0.9995340845 | Chromosome 20 open reading frame 19                       |
| 553 | NM_017569 | FAM48A    | 19 | 7 | 0.9995300366 | Family with sequence similarity 48, member A              |
| 554 | NM_005015 | OXA1L     | 19 | 8 | 0.9995293328 | Oxidase (cytochrome c) assembly 1-like                    |
| 555 | NM_003920 | TIMELESS  | 19 | 8 | 0.9995262816 | Timeless homolog (Drosophila)                             |
| 556 | AK021604  | C12orf2   | 16 | 7 | 0.9995262291 | Chromosome 12 open reading frame 2                        |
| 557 | AF075068  |           | 19 | 8 | 0.9995232350 | Full length insert cDNA YQ04C07                           |
| 558 | NM_014445 | SERP1     | 19 | 8 | 0.9995201089 | Stress-associated endoplasmic reticulum protein 1         |
| 559 | NM_001255 | CDC20     | 19 | 8 | 0.9995177584 | CDC20 cell division cycle 20 homolog (S. cerevisiae)      |

|     |           |           |    |   |              |                                                                                               |
|-----|-----------|-----------|----|---|--------------|-----------------------------------------------------------------------------------------------|
| 560 | AB011116  | MGRN1     | 18 | 8 | 0.9995148638 | Mahogunin, ring finger 1                                                                      |
| 561 | AL157442  | GRINA     | 19 | 8 | 0.9995103138 | Glutamate receptor, ionotropic, N-methyl D-aspartate-associated protein 1 (glutamate binding) |
| 562 | AK024054  |           | 18 | 8 | 0.9995098403 | Data not found                                                                                |
| 563 | NM_006601 | TEBP      | 19 | 8 | 0.9995015246 | Prostaglandin E synthase 3 (cytosolic)                                                        |
| 564 | NM_001282 | AP2B1     | 19 | 8 | 0.9994900524 | Adaptor-related protein complex 2, beta 1 subunit                                             |
| 565 | NM_004282 | BAG2      | 18 | 8 | 0.9994874922 | BCL2-associated athanogene 2                                                                  |
| 566 | NM_016146 | TRAPPC4   | 19 | 8 | 0.9994647107 | Trafficking protein particle complex 4                                                        |
| 567 | NM_015654 | EBSP      | 19 | 8 | 0.9994605172 | N-acetyltransferase 9                                                                         |
| 568 | X94440    | TEAD2     | 17 | 8 | 0.9994582461 | TEA domain family member 2                                                                    |
| 569 | AB007957  |           | 13 | 6 | 0.9994559567 | Data not found                                                                                |
| 570 | AL160131  | C22orf18  | 19 | 7 | 0.9994522140 | Chromosome 22 open reading frame 18                                                           |
| 571 | NM_006875 | PIM2      | 19 | 8 | 0.9994482004 | Pim-2 oncogene                                                                                |
| 572 | AB020713  | NUP210    | 19 | 7 | 0.9994468950 | Nucleoporin 210kDa                                                                            |
| 573 | NM_014381 | MLH3      | 18 | 8 | 0.9994441701 | MutL homolog 3 (E. coli)                                                                      |
| 574 | NM_015936 | CGI-04    | 19 | 8 | 0.9994427019 | Tyrosyl-tRNA synthetase 2 (mitochondrial)                                                     |
| 575 | AK022784  | IMP-1     | 17 | 7 | 0.9994402803 | IGF-II mRNA-binding protein 1                                                                 |
| 576 | NM_014731 | ProSAPiP1 | 19 | 8 | 0.9994340022 | ProSAPiP1 protein                                                                             |
| 577 | NM_003234 | TFRC      | 19 | 8 | 0.9994290767 | Transferrin receptor (p90, CD71)                                                              |
| 578 | NM_013322 | SNX10     | 19 | 8 | 0.9994277148 | Sorting nexin 10                                                                              |
| 579 | NM_001759 | CCND2     | 19 | 8 | 0.9994134678 | Cyclin D2                                                                                     |
| 580 | NM_001949 | E2F3      | 19 | 8 | 0.9994051023 | E2F transcription factor 3                                                                    |
| 581 | AB018324  | SNF1LK2   | 19 | 8 | 0.9994036988 | SNF1-like kinase 2                                                                            |
| 582 | NM_017885 | HCFC1R1   | 19 | 8 | 0.9994008145 | Host cell factor C1 regulator 1 (XPO1 dependant)                                              |
| 583 | AF086109  | FLJ38508  | 19 | 8 | 0.9993986055 | Aldehyde dehydrogenase 1 family, member L2                                                    |
| 584 | AK000660  | CDK6      | 19 | 8 | 0.9993934459 | Cyclin-dependent kinase 6                                                                     |
| 585 | AF075085  | OIT3      | 19 | 8 | 0.9993930670 | Oncoprotein induced transcript 3                                                              |
| 586 | AF052159  | PTPLB     | 19 | 8 | 0.9993922520 | Protein tyrosine phosphatase-like (proline instead of catalytic arginine), member b           |
| 587 | NM_002449 | MSX2      | 19 | 8 | 0.9993889115 | Msh homeo box homolog 2 (Drosophila)                                                          |
| 588 | NM_015923 |           | 19 | 8 | 0.9993886926 | Data not found                                                                                |
| 589 | AK022241  | FLJ10774  | 19 | 7 | 0.9993874720 | N-acetyltransferase-like protein                                                              |
| 590 | S70385    |           | 19 | 8 | 0.9993836115 | Data not found                                                                                |
| 591 | AK022889  | ZNF408    | 19 | 8 | 0.9993694630 | Zinc finger protein 408                                                                       |
| 592 | NM_007057 | ZWINT     | 19 | 8 | 0.9993506048 | ZW10 interactor antisense                                                                     |

|     |           |           |    |   |              |                                                                                                |
|-----|-----------|-----------|----|---|--------------|------------------------------------------------------------------------------------------------|
| 593 | D29954    | KIAA0056  | 19 | 7 | 0.9993489625 | KIAA0056 protein                                                                               |
| 594 | AK026687  | SSR1      | 16 | 7 | 0.9993453469 | Signal sequence receptor, alpha (translocon-associated protein alpha)                          |
| 595 | AF108138  | C15orf20  | 19 | 7 | 0.9993445028 | Chromosome 15 open reading frame 20                                                            |
| 596 | NM_006528 | TFPI2     | 19 | 7 | 0.9993402018 | Tissue factor pathway inhibitor 2                                                              |
| 597 | AK023015  | FLJ12953  | 19 | 7 | 0.9993384839 | WD repeat domain 54                                                                            |
| 598 | NM_018093 | FLJ10439  | 18 | 7 | 0.9993368096 | WD repeat domain 74                                                                            |
| 599 | NM_014745 | LOC348180 | 18 | 8 | 0.9993293199 | Family with sequence similarity 38, member A                                                   |
| 600 | NM_014017 | MAPBPIP   | 19 | 7 | 0.9993256002 | Mitogen-activated protein-binding protein-interacting protein                                  |
| 601 | NM_018155 | FLJ10618  | 19 | 8 | 0.9993228641 | Solute carrier family 25, member 36                                                            |
| 602 | AB002306  | CHD9      | 19 | 8 | 0.9993158710 | Chromodomain helicase DNA binding protein 9                                                    |
| 603 | NM_003225 | TFF1      | 19 | 8 | 0.9993130839 | Trefoil factor 1 (breast cancer, estrogen-inducible sequence expressed in)                     |
| 604 | NM_000973 | RPL8      | 19 | 8 | 0.9993045427 | Ribosomal protein L8                                                                           |
| 605 | NM_001973 | ELK4      | 19 | 8 | 0.9993014915 | ELK4, ETS-domain protein (SRF accessory protein 1)                                             |
| 606 | NM_005563 | STMN1     | 19 | 8 | 0.9992956147 | Stathmin 1/oncoprotein 18                                                                      |
| 607 | NM_005066 | SFPQ      | 17 | 8 | 0.9992954719 | Splicing factor proline/glutamine-rich (polypyrimidine tract binding protein associated)       |
| 608 | X58968    | MMP2      | 19 | 8 | 0.9992909614 | Matrix metalloproteinase 2 (gelatinase A, 72kDa gelatinase, 72kDa type IV collagenase)         |
| 609 | NM_016587 | CBX3      | 19 | 8 | 0.9992853131 | Chromobox homolog 3 (HP1 gamma homolog, Drosophila)                                            |
| 610 | NM_000883 | IMPDH1    | 19 | 8 | 0.9992763406 | IMP (inosine monophosphate) dehydrogenase 1                                                    |
| 611 | NM_012103 | AUP1      | 19 | 8 | 0.9992759096 | Ancient ubiquitous protein 1                                                                   |
| 612 | L40519    | MGC22265  | 19 | 8 | 0.9992722462 | Hypothetical protein MGC22265                                                                  |
| 613 | AB002304  | CIC       | 18 | 8 | 0.9992689041 | Capicua homolog (Drosophila)                                                                   |
| 614 | AF148646  | IMMT      | 19 | 8 | 0.9992642852 | Inner membrane protein, mitochondrial (mitofilin)                                              |
| 615 | NM_000039 | APOA1     | 18 | 7 | 0.9992584011 | Apolipoprotein A-I                                                                             |
| 616 | NM_000935 | PLOD2     | 16 | 8 | 0.9992583169 | Procollagen-lysine, 2-oxoglutarate 5-dioxygenase 2                                             |
| 617 | NM_000291 | PGK1      | 19 | 8 | 0.9992552105 | Phosphoglycerate kinase 1                                                                      |
| 618 | NM_003682 | MADD      | 18 | 8 | 0.9992525208 | MAP-kinase activating death domain                                                             |
| 619 | AK021607  | EME1      | 17 | 5 | 0.9992477021 | Essential meiotic endonuclease 1 homolog 1 (S. pombe)                                          |
| 620 | AF174496  | EEF1A1    | 19 | 8 | 0.9992469282 | Eukaryotic translation elongation factor 1 alpha 1                                             |
| 621 | AB035863  | SUCLA2    | 19 | 8 | 0.9992455252 | Succinate-CoA ligase, ADP-forming, beta subunit                                                |
| 622 | NM_002687 | PNN       | 19 | 8 | 0.9992307249 | Pinin, desmosome associated protein                                                            |
| 623 | AL137403  | CALML4    | 17 | 5 | 0.9992295387 | Calmodulin-like 4                                                                              |
| 624 | NM_000917 | P4HA1     | 18 | 8 | 0.9992293410 | Procollagen-proline, 2-oxoglutarate 4-dioxygenase (proline 4-hydroxylase), alpha polypeptide I |
| 625 | NM_000559 | HBG1      | 18 | 8 | 0.9992206846 | Expansin, putative (EXP6)                                                                      |

|     |           |           |    |   |              |                                                                          |
|-----|-----------|-----------|----|---|--------------|--------------------------------------------------------------------------|
| 626 | AB039920  | KCNQ1DN   | 16 | 5 | 0.9992171637 | KCNQ1 downstream neighbor                                                |
| 627 | AB007930  | POGZ      | 19 | 8 | 0.9992144346 | Pogo transposable element with ZNF domain                                |
| 628 | NM_002707 | PPM1G     | 19 | 8 | 0.9991937183 | Protein phosphatase 1G (formerly 2C), magnesium-dependent, gamma isoform |
| 629 | U92820    |           | 18 | 8 | 0.9991908405 | Data not found                                                           |
| 630 | NM_003016 | SFRS2     | 17 | 8 | 0.9991887082 | Hypothetical protein ET                                                  |
| 631 | AF090895  | CDKAL1    | 17 | 6 | 0.9991721038 | CDK5 regulatory subunit associated protein 1-like 1                      |
| 632 | NM_000207 | INS       | 19 | 6 | 0.9991661709 | Insulin                                                                  |
| 633 | NM_006817 | C12orf8   | 18 | 8 | 0.9991646609 | Chromosome 12 open reading frame 8                                       |
| 634 | AB040903  | TD-60     | 18 | 8 | 0.9991590725 | Regulator of chromosome condensation 2                                   |
| 635 | NM_016049 | C14orf122 | 19 | 8 | 0.9991554638 | Chromosome 14 open reading frame 122                                     |
| 636 | NM_015032 | APRIN     | 19 | 7 | 0.9991477682 | Androgen-induced proliferation inhibitor                                 |
| 637 | AB033046  | GRID1     | 19 | 8 | 0.9991335266 | Glutamate receptor, ionotropic, delta 1                                  |
| 638 | AF124366  | C8orf13   | 18 | 8 | 0.9991321001 | Chromosome 8 open reading frame 13                                       |
| 639 | NM_000999 | RPL38     | 19 | 8 | 0.9991210509 | Ribosomal protein L38                                                    |
| 640 | AK024788  | ADM2      | 18 | 8 | 0.9991184874 | Adrenomedullin 2                                                         |
| 641 | NM_001823 | CKB       | 19 | 8 | 0.9991169566 | Creatine kinase, brain                                                   |
| 642 | U70981    | IL13RA2   | 19 | 8 | 0.9991087107 | Interleukin 13 receptor, alpha 2                                         |
| 643 | NM_002149 | HPCAL1    | 19 | 8 | 0.9991001078 | Hippocalcin-like 1                                                       |
| 644 | NM_005512 | GARP      | 18 | 6 | 0.9990951676 | Leucine rich repeat containing 32                                        |
| 645 | D17082    | NOMO3     | 17 | 8 | 0.9990906952 | NODAL modulator 3                                                        |
| 646 | NM_003755 | EIF3S4    | 18 | 8 | 0.9990683616 | Eukaryotic translation initiation factor 3, subunit 4 delta, 44kDa       |
| 647 | AL080113  | DDX17     | 19 | 8 | 0.9990663530 | DEAD (Asp-Glu-Ala-Asp) box polypeptide 17                                |
| 648 | NM_006932 | SMTN      | 19 | 6 | 0.9990634745 | Smoothelin                                                               |
| 649 | NM_004649 | C21orf33  | 19 | 8 | 0.9990574507 | Chromosome 21 open reading frame 33                                      |
| 650 | NM_014549 |           | 19 | 7 | 0.9990432408 | Data not found                                                           |
| 651 | AF077188  | CUL4A     | 19 | 8 | 0.9990234223 | Cullin 4A                                                                |
| 652 | AK026569  | PPIA      | 19 | 8 | 0.9990196078 | Peptidylprolyl isomerase A (cyclophilin A)                               |
| 653 | NM_015379 | BRI3      | 18 | 8 | 0.9990175342 | Brain protein I3                                                         |
| 654 | NM_001350 | DAXX      | 19 | 8 | 0.9990161586 | Death-associated protein 6                                               |
| 655 | AB035124  | CENPH     | 14 | 8 | 0.9990155414 | Centromere protein H                                                     |
| 656 | NM_007006 | CPSF5     | 19 | 8 | 0.9990067567 | Nudix (nucleoside diphosphate linked moiety X)-type motif 21             |
| 657 | NM_002271 | RANBP5    | 19 | 8 | 0.9990034548 | RAN binding protein 5                                                    |
| 658 | NM_006767 | LZTR1     | 19 | 8 | 0.9990029189 | Leucine-zipper-like transcription regulator 1                            |

|     |           |               |    |   |              |                                                                                                              |
|-----|-----------|---------------|----|---|--------------|--------------------------------------------------------------------------------------------------------------|
| 659 | NM_003064 | SLPI          | 19 | 7 | 0.9989748938 | Secretory leukocyte protease inhibitor (antileukoproteinase)                                                 |
| 660 | NM_003194 | TBP           | 19 | 8 | 0.9989747538 | TATA box binding protein                                                                                     |
| 661 | AK024444  | SR-A1         | 19 | 7 | 0.9989730030 | Serine arginine-rich pre-mRNA splicing factor SR-A1                                                          |
| 662 | NM_005254 | GABPB2        | 19 | 8 | 0.9989720064 | GA binding protein transcription factor, beta subunit 2                                                      |
| 663 | NM_005542 | INSIG1        | 19 | 8 | 0.9989665557 | Insulin induced gene 1                                                                                       |
| 664 | AF090093  | TIA1          | 18 | 8 | 0.9989648838 | TIA1 cytotoxic granule-associated RNA binding protein                                                        |
| 665 | AK022628  | KIAA0415      | 17 | 8 | 0.9989619894 | Forkhead box K1                                                                                              |
| 666 | AB037861  | DKFZP586J0619 | 19 | 8 | 0.9989616266 | DKFZP586J0619 protein                                                                                        |
| 667 | NM_002085 | GPX4          | 19 | 8 | 0.9989440761 | Glutathione peroxidase 4 (phospholipid hydroperoxidase)                                                      |
| 668 | NM_001080 | ALDH5A1       | 19 | 8 | 0.9989266572 | Aldehyde dehydrogenase 5 family, member A1 (succinate-semialdehyde dehydrogenase)                            |
| 669 | NM_017629 | EIF2C4        | 18 | 8 | 0.9989231072 | Eukaryotic translation initiation factor 2C, 4                                                               |
| 670 | AK023033  |               | 14 | 8 | 0.9989042301 | CDNA FLJ12971 fis, clone NT2RP2005882                                                                        |
| 671 | M16006    | SERPINE1      | 19 | 8 | 0.9989020108 | Serine (or cysteine) proteinase inhibitor, clade E (nexin, plasminogen activator inhibitor type 1), member 1 |
| 672 | NM_017523 | HSXIAPAF1     | 19 | 8 | 0.9988946786 | XIAP associated factor-1                                                                                     |
| 673 | NM_019067 | GNL3L         | 19 | 7 | 0.9988946302 | Guanine nucleotide binding protein-like 3 (nucleolar)-like                                                   |
| 674 | AL080170  |               | 19 | 8 | 0.9988908663 | Data not found                                                                                               |
| 675 | NM_016565 | E2IG2         | 18 | 8 | 0.9988877539 | E2IG2 protein                                                                                                |
| 676 | NM_002045 | GAP43         | 16 | 7 | 0.9988868989 | Growth associated protein 43                                                                                 |
| 677 | NM_014794 |               | 19 | 8 | 0.9988792098 | Data not found                                                                                               |
| 678 | NM_001761 | CCNF          | 19 | 7 | 0.9988549134 | Cyclin F                                                                                                     |
| 679 | NM_016139 | CHCHD2        | 19 | 8 | 0.9988529815 | Coiled-coil-helix-coiled-coil-helix domain containing 2                                                      |
| 680 | AF302079  | GRB2          | 18 | 8 | 0.9988422610 | Growth factor receptor-bound protein 2                                                                       |
| 681 | S83390    | NCOR2         | 19 | 8 | 0.9988397033 | Nuclear receptor co-repressor 2                                                                              |
| 682 | U74612    | FOXM1         | 19 | 8 | 0.9988336478 | Forkhead box M1                                                                                              |
| 683 | NM_005896 | IDH1          | 19 | 8 | 0.9988311505 | Isocitrate dehydrogenase 1 (NADP+), soluble                                                                  |
| 684 | NM_000506 | F2            | 19 | 8 | 0.9988283039 | Coagulation factor II (thrombin)                                                                             |
| 685 | NM_002818 | PSME2         | 19 | 8 | 0.9988253835 | Proteasome (prosome, macropain) activator subunit 2 (PA28 beta)                                              |
| 686 | AF007157  | PRNP          | 19 | 8 | 0.9988101188 | Prion protein interacting protein                                                                            |
| 687 | NM_003275 | TMOD1         | 17 | 6 | 0.9988067486 | Tropomodulin 1                                                                                               |
| 688 | D38553    | BRRN1         | 18 | 7 | 0.9987914512 | Barren homolog (Drosophila)                                                                                  |
| 689 | NM_001031 | RPS28         | 19 | 8 | 0.9987909402 | Ribosomal protein S28                                                                                        |
| 690 | AF085941  | ZNF258        | 19 | 8 | 0.9987780349 | Zinc finger protein 258                                                                                      |
| 691 | NM_002454 | MTRR          | 18 | 6 | 0.9987691510 | 5-methyltetrahydrofolate-homocysteine methyltransferase reductase                                            |

|     |           |          |    |   |              |                                                                                             |
|-----|-----------|----------|----|---|--------------|---------------------------------------------------------------------------------------------|
| 692 | NM_005904 | SMAD7    | 18 | 8 | 0.9987667200 | SMAD, mothers against DPP homolog 7 (Drosophila)                                            |
| 693 | NM_001024 | RPS21    | 18 | 8 | 0.9987477512 | Ribosomal protein S21                                                                       |
| 694 | NM_001151 | SLC25A4  | 19 | 8 | 0.9987432632 | Solute carrier family 25 (mitochondrial carrier; adenine nucleotide translocator), member 6 |
| 695 | NM_002186 | IL9R     | 13 | 5 | 0.9987404793 | Interleukin 9 receptor                                                                      |
| 696 | NM_001379 | DNMT1    | 19 | 8 | 0.9987166395 | DNA (cytosine-5-)-methyltransferase 1                                                       |
| 697 | NM_013943 | CLIC4    | 17 | 8 | 0.9986955845 | Chloride intracellular channel 4                                                            |
| 698 | AK024216  | FLJ14154 | 19 | 8 | 0.9986805339 | Hypothetical protein FLJ14154                                                               |
| 699 | AK022342  | LRRC15   | 18 | 7 | 0.9986684314 | Leucine rich repeat containing 15                                                           |
| 700 | NM_006455 | SC65     | 18 | 6 | 0.9986655952 | Synaptonemal complex protein SC65                                                           |
| 701 | NM_018104 |          | 17 | 7 | 0.9986557217 | Data not found                                                                              |
| 702 | NM_006738 | AKAP13   | 16 | 8 | 0.9986478243 | A kinase (PRKA) anchor protein 13                                                           |
| 703 | NM_018518 | MCM10    | 18 | 7 | 0.9986449800 | MCM10 minichromosome maintenance deficient 10 ( <i>S. cerevisiae</i> )                      |
| 704 | NM_005803 | FLOT1    | 19 | 8 | 0.9986399433 | Flotillin 1                                                                                 |
| 705 | NM_006014 | DXS9879E | 17 | 5 | 0.9986276588 | DNA segment on chromosome X (unique) 9879 expressed sequence                                |
| 706 | AK023521  | FER1L4   | 19 | 8 | 0.9986228996 | Fer-1-like 4 ( <i>C. elegans</i> )                                                          |
| 707 | NM_001641 | APEX1    | 19 | 8 | 0.9986211393 | APEX nuclease (multifunctional DNA repair enzyme) 1                                         |
| 708 | NM_005479 | FRAT1    | 19 | 8 | 0.9986052991 | Frequently rearranged in advanced T-cell lymphomas                                          |
| 709 | D17231    |          | 18 | 8 | 0.9985996810 | Data not found                                                                              |
| 710 | NM_014053 | FLVCR    | 19 | 7 | 0.9985984922 | Feline leukemia virus subgroup C cellular receptor                                          |
| 711 | NM_002969 | MAPK12   | 19 | 7 | 0.9985926790 | Mitogen-activated protein kinase 12                                                         |
| 712 | NM_005151 | USP14    | 17 | 7 | 0.9985924236 | Ubiquitin specific protease 14 (tRNA-guanine transglycosylase)                              |
| 713 | NM_001105 | ACVR1    | 18 | 8 | 0.9985841124 | Activin A receptor, type I                                                                  |
| 714 | Y10483    |          | 19 | 8 | 0.9985713564 | Protein kinase, X-linked, pseudogene 1                                                      |
| 715 | NM_000174 | GP9      | 19 | 8 | 0.9985623756 | Glycoprotein IX (platelet)                                                                  |
| 716 | AK021668  | DR1      | 19 | 8 | 0.9985615424 | Down-regulator of transcription 1, TBP-binding (negative cofactor 2)                        |
| 717 | NM_005505 | SCARB1   | 18 | 8 | 0.9985610209 | Scavenger receptor class B, member 1                                                        |
| 718 | AB046844  | GPR107   | 17 | 7 | 0.9985571168 | G protein-coupled receptor 107                                                              |
| 719 | AF320908  | MAGED4   | 17 | 7 | 0.9985534805 | Melanoma antigen family D, 4                                                                |
| 720 | NM_020182 | TMEPAI   | 18 | 8 | 0.9985500687 | Transmembrane, prostate androgen induced RNA                                                |
| 721 | NM_006265 | RAD21    | 19 | 8 | 0.9985474905 | RAD21 homolog ( <i>S. pombe</i> )                                                           |
| 722 | NM_016440 | VRK3     | 18 | 8 | 0.9985450222 | Vaccinia related kinase 3                                                                   |
| 723 | NM_006706 | TCERG1   | 19 | 8 | 0.9985420320 | Transcription elongation regulator 1                                                        |
| 724 | NM_004369 | COL6A3   | 18 | 8 | 0.9985414759 | Collagen, type VI, alpha 3                                                                  |

|     |           |           |    |   |              |                                                                                                               |
|-----|-----------|-----------|----|---|--------------|---------------------------------------------------------------------------------------------------------------|
| 725 | AL109677  | LRRN6A    | 19 | 8 | 0.9985282059 | Leucine rich repeat neuronal 6A                                                                               |
| 726 | NM_002626 | PFKL      | 18 | 8 | 0.9985281216 | Phosphofructokinase, liver                                                                                    |
| 727 | NM_016205 | PDGFC     | 19 | 7 | 0.9985250343 | Platelet derived growth factor C                                                                              |
| 728 | NM_005703 |           | 18 | 8 | 0.9985175344 | Data not found                                                                                                |
| 729 | AK024090  | SIAT7B    | 19 | 8 | 0.9985137451 | ST6 (alpha-N-acetyl-neuraminyl-2,3-beta-galactosyl-1,3)-N-acetylgalactosaminide alpha-2,6-sialyltransferase 2 |
| 730 | AL110141  | GAS5      | 19 | 8 | 0.9985132171 | Growth arrest-specific 5                                                                                      |
| 731 | NM_006739 | MCM5      | 18 | 8 | 0.9985058299 | MCM5 minichromosome maintenance deficient 5, cell division cycle 46 ( <i>S. cerevisiae</i> )                  |
| 732 | NM_013402 | FADS1     | 19 | 8 | 0.9984995389 | Fatty acid desaturase 1                                                                                       |
| 733 | NM_005439 | MLF2      | 19 | 8 | 0.9984906686 | Myeloid leukemia factor 2                                                                                     |
| 734 | NM_004356 | CD81      | 18 | 8 | 0.9984874207 | CD81 antigen (target of antiproliferative antibody 1)                                                         |
| 735 | NM_003355 | UCP2      | 17 | 6 | 0.9984811918 | Uncoupling protein 2 (mitochondrial, proton carrier)                                                          |
| 736 | NM_016180 | MATP      | 19 | 8 | 0.9984724837 | Membrane associated transporter                                                                               |
| 737 | AK025740  | ABC1      | 17 | 8 | 0.9984712934 | Amplified in breast cancer 1                                                                                  |
| 738 | NM_018130 | FLJ10539  | 18 | 8 | 0.9984670763 | SHQ1 homolog ( <i>S. cerevisiae</i> )                                                                         |
| 739 | AK000872  |           | 19 | 8 | 0.9984562798 | LOC440312                                                                                                     |
| 740 | NM_000521 | HEXB      | 18 | 8 | 0.9984524479 | Hexosaminidase B (beta polypeptide)                                                                           |
| 741 | AF147359  | RAI1      | 14 | 6 | 0.9984440667 | Smith-Magenis syndrome chromosome region, candidate 3                                                         |
| 742 | AK021443  |           | 16 | 8 | 0.9984369240 | CDNA FLJ11381 fis, clone HEMBA1000501                                                                         |
| 743 | AB002360  | MCF2L     | 19 | 5 | 0.9984095936 | MCF.2 cell line derived transforming sequence-like                                                            |
| 744 | AK000933  | OPN3      | 19 | 8 | 0.9983957283 | Opsin 3 (encephalopsin, panopsin)                                                                             |
| 745 | NM_017921 | NPL4      | 19 | 7 | 0.9983836537 | Nuclear protein localization 4                                                                                |
| 746 | AF124433  | USP29     | 17 | 6 | 0.9983716251 | Ubiquitin specific protease 29                                                                                |
| 747 | NM_004838 | HOMER3    | 18 | 7 | 0.9983659484 | Homer homolog 3 ( <i>Drosophila</i> )                                                                         |
| 748 | K03175    | APOB      | 16 | 7 | 0.9983530995 | Apolipoprotein B (including Ag(x) antigen)                                                                    |
| 749 | AF075050  | SGTB      | 19 | 7 | 0.9983512194 | Small glutamine-rich tetratricopeptide repeat (TPR)-containing, beta                                          |
| 750 | NM_002946 | RPA2      | 19 | 8 | 0.9983430541 | Replication protein A2, 32kDa                                                                                 |
| 751 | AK024615  | LOC338645 | 16 | 5 | 0.9983425818 | Leucine zipper protein 2                                                                                      |
| 752 | NM_015913 | TLP19     | 19 | 8 | 0.9983359821 | Thioredoxin domain containing 12 (endoplasmic reticulum)                                                      |
| 753 | AK001395  | SNX27     | 18 | 8 | 0.9983326214 | Sorting nexin family member 27                                                                                |
| 754 | AK024392  |           | 19 | 8 | 0.9983137179 | Data not found                                                                                                |
| 755 | NM_003091 | SNRPB     | 19 | 8 | 0.9983115361 | Small nuclear ribonucleoprotein polypeptides B and B1                                                         |
| 756 | NM_000942 | PPIB      | 19 | 8 | 0.9983063666 | Peptidylprolyl isomerase B (cyclophilin B)                                                                    |
| 757 | NM_007086 | WDHD1     | 19 | 8 | 0.9983054201 | WD repeat and HMG-box DNA binding protein 1                                                                   |

|     |           |          |    |   |              |                                                                                                                    |
|-----|-----------|----------|----|---|--------------|--------------------------------------------------------------------------------------------------------------------|
| 758 | NM_016434 | TNFRSF6B | 19 | 8 | 0.9982836836 | Tumor necrosis factor receptor superfamily, member 6b, decoy                                                       |
| 759 | NM_005885 | MARCH-VI | 19 | 8 | 0.9982744718 | Membrane-associated ring finger (C3HC4) 6                                                                          |
| 760 | AF275798  | CCT5     | 17 | 8 | 0.9982720365 | Chaperonin containing TCP1, subunit 5 (epsilon)                                                                    |
| 761 | NM_000138 | FBN1     | 19 | 8 | 0.9982691799 | Fibrillin 1 (Marfan syndrome)                                                                                      |
| 762 | NM_014187 | HSPC171  | 19 | 8 | 0.9982651350 | HSPC171 protein                                                                                                    |
| 763 | NM_014750 | DLG7     | 19 | 8 | 0.9982639909 | Discs, large homolog 7 (Drosophila)                                                                                |
| 764 | NM_006026 | H1FX     | 19 | 8 | 0.9982573827 | H1 histone family, member X                                                                                        |
| 765 | AK001380  | ASPM     | 19 | 7 | 0.9982533546 | Asp (abnormal spindle)-like, microcephaly associated (Drosophila)                                                  |
| 766 | NM_004577 | PSPH     | 19 | 8 | 0.9982529459 | Phosphoserine phosphatase                                                                                          |
| 767 | NM_004862 | LITAF    | 19 | 7 | 0.9982425604 | Lipopolysaccharide-induced TNF factor                                                                              |
| 768 | AK024439  | KLHL6    | 19 | 8 | 0.9982308429 | Kelch-like 6 (Drosophila)                                                                                          |
| 769 | NM_000596 | IGFBP1   | 16 | 6 | 0.9982267088 | Insulin-like growth factor binding protein 1                                                                       |
| 770 | NM_002496 | NDUFS8   | 19 | 8 | 0.9982225888 | NADH dehydrogenase (ubiquinone) Fe-S protein 8, 23kDa (NADH-coenzyme Q reductase)                                  |
| 771 | NM_018321 | BRIX     | 19 | 8 | 0.9982191118 | Brix domain containing 2                                                                                           |
| 772 | AK023149  | DRF1     | 19 | 8 | 0.9982092020 | Dbf4-related factor 1                                                                                              |
| 773 | NM_006854 | KDELR2   | 19 | 8 | 0.9982036548 | KDEL (Lys-Asp-Glu-Leu) endoplasmic reticulum protein retention receptor 2                                          |
| 774 | NM_003731 | SSNA1    | 18 | 8 | 0.9981930961 | Sjogren's syndrome nuclear autoantigen 1                                                                           |
| 775 | NM_014390 | SND1     | 19 | 8 | 0.9981747893 | Staphylococcal nuclease domain containing 1                                                                        |
| 776 | NM_001621 | AHR      | 19 | 8 | 0.9981703895 | Aryl hydrocarbon receptor                                                                                          |
| 777 | AF086234  | C6orf125 | 19 | 8 | 0.9981597906 | Chromosome 6 open reading frame 125                                                                                |
| 778 | NM_002296 | LBR      | 19 | 8 | 0.9981590853 | Lamin B receptor                                                                                                   |
| 779 | NM_018266 | TMEM39A  | 19 | 8 | 0.9981534463 | Transmembrane protein 39A                                                                                          |
| 780 | NM_004385 | CSPG2    | 19 | 7 | 0.9981529003 | Chondroitin sulfate proteoglycan 2 (versican)                                                                      |
| 781 | NM_016214 |          | 15 | 8 | 0.9981439394 | Data not found                                                                                                     |
| 782 | AF264014  | M160     | 18 | 8 | 0.9981310712 | Scavenger receptor cysteine-rich type 1 protein M160                                                               |
| 783 | NM_012111 | AHSA1    | 19 | 8 | 0.9981230285 | AHA1, activator of heat shock 90kDa protein ATPase homolog 1 (yeast)                                               |
| 784 | NM_014849 | SV2A     | 19 | 8 | 0.9981143945 | Synaptic vesicle glycoprotein 2A                                                                                   |
| 785 | NM_001224 | CASP2    | 19 | 8 | 0.9981085246 | Caspase 2, apoptosis-related cysteine protease (neural precursor cell expressed, developmentally down-regulated 2) |
| 786 | NM_016491 | MRPL37   | 19 | 8 | 0.9980949193 | Mitochondrial ribosomal protein L37                                                                                |
| 787 | L24123    |          | 19 | 8 | 0.9980744137 | Data not found                                                                                                     |
| 788 | NM_002817 | PSMD13   | 19 | 7 | 0.9980659944 | Proteasome (prosome, macropain) 26S subunit, non-ATPase, 13                                                        |
| 789 | AK026940  | C7orf2   | 19 | 8 | 0.9980655612 | Limb region 1 homolog (mouse)                                                                                      |
| 790 | AK024545  |          | 19 | 8 | 0.9980506794 | CDNA: FLJ20892 fis, clone ADKA03430                                                                                |



|     |           |          |    |   |              |                                                                                                                          |
|-----|-----------|----------|----|---|--------------|--------------------------------------------------------------------------------------------------------------------------|
| 791 | AL079296  | CXorf23  | 16 | 6 | 0.9980467029 | Chromosome X open reading frame 23                                                                                       |
| 792 | AF040964  | C4orf15  | 19 | 8 | 0.9980433821 | Chromosome 4 open reading frame 15                                                                                       |
| 793 | L09247    | RPL10A   | 19 | 8 | 0.9980427817 | Ribosomal protein L10a                                                                                                   |
| 794 | D38438    |          | 18 | 8 | 0.9980354135 | Postmeiotic segregation increased 2-like 4                                                                               |
| 795 | NM_006597 | HSPA8    | 18 | 8 | 0.9980328945 | Heat shock 70kDa protein 8                                                                                               |
| 796 | AL137311  | DNER     | 17 | 7 | 0.9980168954 | Delta-notch-like EGF repeat-containing transmembrane                                                                     |
| 797 | AK023255  | RNUXA    | 19 | 8 | 0.9980157998 | RNA U, small nuclear RNA export adaptor (phosphorylation regulated)                                                      |
| 798 | AF146798  | PME-1    | 13 | 5 | 0.9980058909 | Protein phosphatase methylesterase-1                                                                                     |
| 799 | AB032997  | KIAA1171 | 19 | 8 | 0.9980000278 | KIAA1171 protein                                                                                                         |
| 800 | NM_004342 | CALD1    | 19 | 8 | 0.9979892742 | Caldesmon 1                                                                                                              |
| 801 | NM_016059 | PPIL1    | 19 | 8 | 0.9979839794 | Peptidylprolyl isomerase (cyclophilin)-like 1                                                                            |
| 802 | NM_014833 |          | 15 | 8 | 0.9979648412 | Data not found                                                                                                           |
| 803 | AK023266  | MOBKL2B  | 19 | 8 | 0.9979604397 | MOB1, Mps One Binder kinase activator-like 2B (yeast)                                                                    |
| 804 | NM_017528 | WBSCR22  | 19 | 8 | 0.9979516294 | Williams Beuren syndrome chromosome region 22                                                                            |
| 805 | NM_005513 | GTF2E1   | 19 | 8 | 0.9979274891 | General transcription factor IIE, polypeptide 1, alpha 56kDa                                                             |
| 806 | AF201941  | C1orf48  | 13 | 7 | 0.9979164743 | Chromosome 1 open reading frame 48                                                                                       |
| 807 | NM_002500 | NEUROD1  | 18 | 7 | 0.9979053841 | Neurogenic differentiation 1                                                                                             |
| 808 | AF009258  | SEMA5A   | 19 | 8 | 0.9978998745 | Sema domain, seven thrombospondin repeats (type 1 and type 1-like), transmembrane domain (TM) and short cytoplasmic tail |
| 809 | NM_001864 | COX7A1   | 18 | 8 | 0.9978948034 | Cytochrome c oxidase subunit VIIa polypeptide 1 (muscle)                                                                 |
| 810 | U96131    | TRIP13   | 19 | 8 | 0.9978769961 | Thyroid hormone receptor interactor 13                                                                                   |
| 811 | AF090885  |          | 19 | 8 | 0.9978762455 | Data not found                                                                                                           |
| 812 | NM_006598 | SLC12A7  | 18 | 7 | 0.9978737328 | Solute carrier family 12 (potassium/chloride transporters), member 7                                                     |
| 813 | AF283645  | MFTC     | 19 | 6 | 0.9978717294 | Mitochondrial folate transporter/carrier                                                                                 |
| 814 | AF086257  | SIAT4B   | 14 | 8 | 0.9978627165 | ST3 beta-galactoside alpha-2,3-sialyltransferase 2                                                                       |
| 815 | NM_007065 | CDC37    | 19 | 8 | 0.9978597097 | CDC37 cell division cycle 37 homolog (S. cerevisiae)                                                                     |
| 816 | NM_003143 | SSBP1    | 19 | 8 | 0.9978570070 | Single-stranded DNA binding protein 1                                                                                    |
| 817 | NM_006396 | SSSCA1   | 19 | 8 | 0.9978517319 | Sjogren's syndrome/scleroderma autoantigen 1                                                                             |
| 818 | NM_005016 | PCBP2    | 19 | 8 | 0.9978454895 | Poly(rC) binding protein 2                                                                                               |
| 819 | NM_003531 | HIST1H3C | 18 | 8 | 0.9978368386 | Histone 1, H3c                                                                                                           |
| 820 | NM_004502 | HOXB7    | 18 | 7 | 0.9978334025 | Homeo box B7                                                                                                             |
| 821 | NM_001468 | GAGE2    | 18 | 7 | 0.9978204768 | G antigen 1                                                                                                              |
| 822 | NM_005909 | MAP1B    | 17 | 8 | 0.9978182499 | Microtubule-associated protein 1B                                                                                        |
| 823 | NM_013400 | REPIN1   | 19 | 8 | 0.9978051600 | Replication initiator 1                                                                                                  |

|     |           |           |    |   |              |                                                                                                                         |
|-----|-----------|-----------|----|---|--------------|-------------------------------------------------------------------------------------------------------------------------|
| 824 | NM_002790 | PSMA5     | 19 | 8 | 0.9978024961 | Proteasome (prosome, macropain) subunit, alpha type, 5                                                                  |
| 825 | NM_004959 | NR5A1     | 19 | 8 | 0.9977896300 | Nuclear receptor subfamily 5, group A, member 1                                                                         |
| 826 | NM_015908 | ARS2      | 19 | 8 | 0.9977765370 | Arsenate resistance protein ARS2                                                                                        |
| 827 | NM_016520 | C9orf78   | 19 | 8 | 0.9977635083 | Chromosome 9 open reading frame 78                                                                                      |
| 828 | AL050370  | FLJ33790  | 19 | 8 | 0.9977426464 | Hypothetical protein FLJ33790                                                                                           |
| 829 | NM_003692 | TMEFF1    | 15 | 8 | 0.9977406617 | Transmembrane protein with EGF-like and two follistatin-like domains 1                                                  |
| 830 | NM_002875 | RAD51     | 17 | 8 | 0.9977399262 | RAD51 homolog (RecA homolog, E. coli) (S. cerevisiae)                                                                   |
| 831 | J00129    | FGB       | 18 | 8 | 0.9977389616 | Fibrinogen beta chain                                                                                                   |
| 832 | NM_014341 | MTCH1     | 19 | 8 | 0.9977359656 | Mitochondrial carrier homolog 1 (C. elegans)                                                                            |
| 833 | AK025798  | LOC203547 | 18 | 8 | 0.9977343564 | Hypothetical protein LOC203547                                                                                          |
| 834 | D13540    | PTPN11    | 18 | 8 | 0.9977078831 | Protein tyrosine phosphatase, non-receptor type 11 (Noonan syndrome 1)                                                  |
| 835 | NM_004516 | ILF3      | 19 | 8 | 0.9977041683 | Interleukin enhancer binding factor 3, 90kDa                                                                            |
| 836 | AL109790  |           | 19 | 7 | 0.9977034470 | Data not found                                                                                                          |
| 837 | NM_004698 | PRPF3     | 19 | 8 | 0.9977020089 | PRP3 pre-mRNA processing factor 3 homolog (yeast)                                                                       |
| 838 | AK024278  | CD99L2    | 19 | 8 | 0.9977001347 | CD99 antigen-like 2                                                                                                     |
| 839 | U26662    | NPTX2     | 16 | 7 | 0.9976854396 | Neuronal pentraxin II                                                                                                   |
| 840 | NM_004894 | C14orf2   | 19 | 8 | 0.9976811360 | Chromosome 14 open reading frame 2                                                                                      |
| 841 | NM_006667 | PGRMC1    | 19 | 8 | 0.9976809546 | Progesterone receptor membrane component 1                                                                              |
| 842 | D28390    | TUBA6     | 19 | 8 | 0.9976636505 | Tubulin alpha 6                                                                                                         |
| 843 | NM_014720 | SLK       | 19 | 8 | 0.9976635475 | STE20-like kinase (yeast)                                                                                               |
| 844 | NM_000633 | BCL2      | 19 | 8 | 0.9976603806 | B-cell CLL/lymphoma 2                                                                                                   |
| 845 | NM_002809 | PSMD3     | 19 | 8 | 0.9976517836 | Proteasome (prosome, macropain) 26S subunit, non-ATPase, 3                                                              |
| 846 | NM_000208 | INSR      | 16 | 7 | 0.9976458324 | Insulin receptor                                                                                                        |
| 847 | NM_007279 | U2AF2     | 19 | 8 | 0.9976453798 | U2 (RNU2) small nuclear RNA auxiliary factor 2                                                                          |
| 848 | AB007915  |           | 17 | 8 | 0.9976421379 | Data not found                                                                                                          |
| 849 | NM_006183 | NTS       | 18 | 8 | 0.9976372119 | Neurotensin                                                                                                             |
| 850 | NM_020315 | PDXP      | 12 | 6 | 0.9976203518 | Pyridoxal (pyridoxine, vitamin B6) phosphatase                                                                          |
| 851 | NM_014949 | KIAA0907  | 19 | 7 | 0.9975936328 | KIAA0907                                                                                                                |
| 852 | AJ272196  | HSA272196 | 18 | 8 | 0.9975868224 | Hypothetical protein, clone 2746033                                                                                     |
| 853 | NM_006170 | NOL1      | 18 | 8 | 0.9975782974 | Nucleolar protein 1, 120kDa                                                                                             |
| 854 | AF235023  | HCAP-G    | 19 | 8 | 0.9975769576 | Chromosome condensation protein G                                                                                       |
| 855 | NM_003510 | HIST1H2AK | 16 | 6 | 0.9975385009 | Histone 1, H2ak                                                                                                         |
| 856 | M62399    | RELA      | 19 | 8 | 0.9975325137 | V-rel reticuloendotheliosis viral oncogene homolog A, nuclear factor of kappa light polypeptide gene enhancer in B-cell |

|     |           |           |    |   |              |                                                              |
|-----|-----------|-----------|----|---|--------------|--------------------------------------------------------------|
| 857 | NM_002874 | RAD23B    | 18 | 8 | 0.9975194309 | RAD23 homolog B ( <i>S. cerevisiae</i> )                     |
| 858 | AF087983  |           | 15 | 5 | 0.9975027419 | Full length insert cDNA clone YW28G08                        |
| 859 | X15183    | HSPCA     | 19 | 8 | 0.9974969700 | Heat shock 90kDa protein 1, alpha                            |
| 860 | AL109679  | C15orf5   | 16 | 5 | 0.9974840984 | Chromosome 15 open reading frame 5                           |
| 861 | NM_000344 | SMN2      | 18 | 8 | 0.9974816504 | Survival of motor neuron 1, telomeric                        |
| 862 | NM_012072 | C1QR1     | 16 | 7 | 0.9974734598 | Complement component 1, q subcomponent, receptor 1           |
| 863 | NM_002890 | RASA1     | 19 | 8 | 0.9974722216 | RAS p21 protein activator (GTPase activating protein) 1      |
| 864 | NM_020388 | DST       | 18 | 8 | 0.9974669817 | Dystonin                                                     |
| 865 | NM_020240 | CDC42SE2  | 14 | 8 | 0.9974668770 | CDC42 small effector 2                                       |
| 866 | AK023520  | CBX5      | 14 | 8 | 0.9974606141 | Chromobox homolog 5 (HP1 alpha homolog, <i>Drosophila</i> )  |
| 867 | AF166125  | SEPN1     | 19 | 7 | 0.9974526431 | Selenoprotein N, 1                                           |
| 868 | NM_005212 | CSN3      | 16 | 7 | 0.9974475863 | Casein kappa                                                 |
| 869 | NM_020040 | TUBB4Q    | 18 | 6 | 0.9974326582 | Tubulin, beta polypeptide 4, member Q                        |
| 870 | NM_019886 | CHST7     | 18 | 6 | 0.9974325114 | Carbohydrate (N-acetylglucosamine 6-O) sulfotransferase 7    |
| 871 | AK025726  | EIF2C1    | 15 | 8 | 0.9974238386 | Eukaryotic translation initiation factor 2C, 1               |
| 872 | NM_018835 | MNAB      | 19 | 8 | 0.9974053058 | Membrane associated DNA binding protein                      |
| 873 | AK022276  | MAP2K1    | 14 | 5 | 0.9973973293 | Mitogen-activated protein kinase kinase 1                    |
| 874 | NM_001845 | COL4A1    | 18 | 8 | 0.9973937268 | Collagen, type IV, alpha 1                                   |
| 875 | U50383    | SMYD5     | 19 | 8 | 0.9973878259 | SMYD family member 5                                         |
| 876 | AB031046  | TCF7L1    | 19 | 8 | 0.9973615961 | Transcription factor 7-like 1 (T-cell specific, HMG-box)     |
| 877 | AF110265  | EPS15L1   | 19 | 8 | 0.9973615912 | Epidermal growth factor receptor pathway substrate 15-like 1 |
| 878 | NM_001458 | FLNC      | 18 | 8 | 0.9973549007 | Filamin C, gamma (actin binding protein 280)                 |
| 879 | L19183    | MAC30     | 19 | 8 | 0.9973082813 | Hypothetical protein MAC30                                   |
| 880 | M26880    |           | 19 | 8 | 0.9972998160 | Data not found                                               |
| 881 | NM_014668 | GREB1     | 16 | 6 | 0.9972872272 | GREB1 protein                                                |
| 882 | NM_013310 | C2orf27   | 18 | 7 | 0.9972822279 | Chromosome 2 open reading frame 27                           |
| 883 | AK024896  | MRPS6     | 19 | 8 | 0.9972676570 | Mitochondrial ribosomal protein S6                           |
| 884 | NM_016333 | SRRM2     | 18 | 8 | 0.9972432822 | Serine/arginine repetitive matrix 2                          |
| 885 | NM_001792 | CDH2      | 19 | 8 | 0.9972398646 | Cadherin 2, type 1, N-cadherin (neuronal)                    |
| 886 | NM_005717 | ARPC5     | 18 | 8 | 0.9972359259 | Actin related protein 2/3 complex, subunit 5, 16kDa          |
| 887 | NM_003504 | CDC45L    | 19 | 8 | 0.9972267002 | CDC45 cell division cycle 45-like ( <i>S. cerevisiae</i> )   |
| 888 | NM_003525 | HIST1H2BI | 19 | 8 | 0.9972156148 | Histone 1, H2bi                                              |
| 889 | AL137669  | LIP8      | 19 | 8 | 0.9972128208 | LYST-interacting protein LIP8                                |

|     |           |           |    |   |              |                                                                                                                       |
|-----|-----------|-----------|----|---|--------------|-----------------------------------------------------------------------------------------------------------------------|
| 890 | NM_017774 | CDKAL1    | 14 | 8 | 0.9972055395 | CDK5 regulatory subunit associated protein 1-like 1                                                                   |
| 891 | AK025442  | TXNDC5    | 19 | 7 | 0.9971903493 | Thioredoxin domain containing 5                                                                                       |
| 892 | AL080213  | PDE4DIP   | 14 | 5 | 0.9971894441 | Phosphodiesterase 4D interacting protein (myomegalin)                                                                 |
| 893 | D80004    | KIAA0182  | 19 | 8 | 0.9971823079 | KIAA0182 protein                                                                                                      |
| 894 | NM_018944 | C21orf45  | 17 | 7 | 0.9971703218 | Chromosome 21 open reading frame 45                                                                                   |
| 895 | NM_016357 | EPLIN     | 19 | 8 | 0.9971664108 | Epithelial protein lost in neoplasm beta                                                                              |
| 896 | NM_012255 | XRN2      | 19 | 8 | 0.9971639136 | 5'-3' exoribonuclease 2                                                                                               |
| 897 | D00174    | SERPINF2  | 18 | 8 | 0.9971592305 | Serine (or cysteine) proteinase inhibitor, clade F (alpha-2 antiplasmin, pigment epithelium derived factor), member 2 |
| 898 | AL359943  |           | 19 | 8 | 0.9971578308 | Hypothetical protein LOC115110                                                                                        |
| 899 | AK002197  | KIAA1340  | 19 | 7 | 0.9971542783 | Kelch domain containing 5                                                                                             |
| 900 | AB002365  | KIAA0367  | 16 | 6 | 0.9971450189 | KIAA0367                                                                                                              |
| 901 | AL137724  | MGC20460  | 19 | 8 | 0.9971400002 | Proline rich 8                                                                                                        |
| 902 | AF087991  | NTNG1     | 19 | 8 | 0.9971327141 | Netrin G1                                                                                                             |
| 903 | NM_014206 | C11orf10  | 19 | 7 | 0.9971242475 | Chromosome 11 open reading frame 10                                                                                   |
| 904 | NM_005862 | STAG1     | 18 | 8 | 0.9971130680 | Stromal antigen 1                                                                                                     |
| 905 | NM_007295 | BRCA1     | 19 | 7 | 0.9970741654 | Breast cancer 1, early onset                                                                                          |
| 906 | NM_003829 | MPDZ      | 18 | 7 | 0.9970709449 | Multiple PDZ domain protein                                                                                           |
| 907 | NM_004640 | BAT1      | 19 | 8 | 0.9970533486 | HLA-B associated transcript 1                                                                                         |
| 908 | NM_016002 | CGI-49    | 18 | 7 | 0.9970460309 | Saccharopine dehydrogenase (putative)                                                                                 |
| 909 | AK001889  | PRLR      | 16 | 5 | 0.9970305101 | Prolactin receptor                                                                                                    |
| 910 | Z36875    |           | 19 | 8 | 0.9970258216 | Similar to Retinol dehydrogenase 12                                                                                   |
| 911 | AF029777  | GCN5L2    | 18 | 8 | 0.9969974904 | GCN5 general control of amino-acid synthesis 5-like 2 (yeast)                                                         |
| 912 | NM_000179 | MSH6      | 19 | 8 | 0.9969822339 | MutS homolog 6 (E. coli)                                                                                              |
| 913 | Y17179    |           | 19 | 8 | 0.9969792290 | Data not found                                                                                                        |
| 914 | NM_005808 | CTDSPL    | 19 | 8 | 0.9969749708 | CTD (carboxy-terminal domain, RNA polymerase II, polypeptide A) small phosphatase-like                                |
| 915 | AF301222  | NY-REN-41 | 19 | 7 | 0.9969666694 | NY-REN-41 antigen                                                                                                     |
| 916 | Y08267    | MLL2      | 18 | 8 | 0.9969647159 | Myeloid/lymphoid or mixed-lineage leukemia 2                                                                          |
| 917 | NM_001274 | CHEK1     | 18 | 8 | 0.9969636944 | CHK1 checkpoint homolog (S. pombe)                                                                                    |
| 918 | AF161362  | KIAA0460  | 17 | 8 | 0.9969207556 | KIAA0460                                                                                                              |
| 919 | AF189251  | FLJ90013  | 9  | 7 | 0.9969023937 | Hypothetical protein FLJ90013                                                                                         |
| 920 | NM_001809 | CENPA     | 19 | 8 | 0.9968868118 | Centromere protein A, 17kDa                                                                                           |
| 921 | NM_014397 | NEK6      | 18 | 7 | 0.9968857368 | NIMA (never in mitosis gene a)-related kinase 6                                                                       |
| 922 | D16892    | TRA1      | 19 | 8 | 0.9968276223 | Tumor rejection antigen (gp96) 1                                                                                      |

|     |           |          |    |   |              |                                                                                          |
|-----|-----------|----------|----|---|--------------|------------------------------------------------------------------------------------------|
| 923 | NM_003165 | STXBP1   | 18 | 8 | 0.9968113482 | Syntaxin binding protein 1                                                               |
| 924 | NM_002919 | RFX3     | 19 | 8 | 0.9967843797 | Regulatory factor X, 3 (influences HLA class II expression)                              |
| 925 | NM_007362 | NCBP2    | 19 | 8 | 0.9967781021 | Nuclear cap binding protein subunit 2, 20kDa                                             |
| 926 | NM_014275 | MGAT4B   | 19 | 7 | 0.9967575349 | Mannosyl (alpha-1,3-)-glycoprotein beta-1,4-N-acetylglucosaminyltransferase, isoenzyme B |
| 927 | AK026022  |          | 18 | 8 | 0.9967419035 | Data not found                                                                           |
| 928 | NM_002632 | PGF      | 16 | 6 | 0.9967267460 | Placental growth factor, vascular endothelial growth factor-related protein              |
| 929 | AL390147  | FAM20C   | 14 | 8 | 0.9967245745 | Family with sequence similarity 20, member C                                             |
| 930 | NM_006948 | STCH     | 19 | 8 | 0.9967227444 | Stress 70 protein chaperone, microsome-associated, 60kDa                                 |
| 931 | AF131738  |          | 19 | 8 | 0.9967082525 | Hypothetical LOC440675                                                                   |
| 932 | U27655    | RGS3     | 19 | 8 | 0.9967018879 | Regulator of G-protein signalling 3                                                      |
| 933 | NM_005194 | CEBPB    | 19 | 8 | 0.9967013270 | CCAAT/enhancer binding protein (C/EBP), beta                                             |
| 934 | NM_000702 | ATP1A2   | 19 | 8 | 0.9966894036 | ATPase, Na+/K+ transporting, alpha 2 (+) polypeptide                                     |
| 935 | NM_018270 | C20orf20 | 19 | 7 | 0.9966827450 | Chromosome 20 open reading frame 20                                                      |
| 936 | NM_015889 | PCQAP    | 19 | 8 | 0.9966661044 | PC2 (positive cofactor 2, multiprotein complex) glutamine/Q-rich-associated protein      |
| 937 | AB000520  | APS      | 18 | 7 | 0.9966611810 | Adaptor protein with pleckstrin homology and src homology 2 domains                      |
| 938 | NM_014520 | MYBBP1A  | 19 | 8 | 0.9966497994 | MYB binding protein (P160) 1a                                                            |
| 939 | NM_002572 | PAFAH1B2 | 18 | 8 | 0.9966472587 | Platelet-activating factor acetylhydrolase, isoform Ib, beta subunit 30kDa               |
| 940 | AK026368  |          | 17 | 7 | 0.9966403478 | Similar to ankyrin repeat domain 20A                                                     |
| 941 | NM_014137 |          | 12 | 5 | 0.9966202415 | Data not found                                                                           |
| 942 | AB011173  | AOF2     | 19 | 8 | 0.9966190762 | Amine oxidase (flavin containing) domain 2                                               |
| 943 | NM_015850 | FGFR1    | 18 | 8 | 0.9966063622 | Fibroblast growth factor receptor 1 (fms-related tyrosine kinase 2, Pfeiffer syndrome)   |
| 944 | D30612    | ZNF282   | 19 | 8 | 0.9965751175 | Zinc finger protein 282                                                                  |
| 945 | NM_006567 | FARS2    | 19 | 8 | 0.9965747749 | Phenylalanine-tRNA synthetase 2 (mitochondrial)                                          |
| 946 | NM_000195 | HPS1     | 19 | 8 | 0.9965683191 | Hermansky-Pudlak syndrome 1                                                              |
| 947 | AF254082  | ZNF278   | 19 | 8 | 0.9965620191 | Zinc finger protein 278                                                                  |
| 948 | AF019225  | APOL1    | 19 | 8 | 0.9965567917 | Apolipoprotein L, 1                                                                      |
| 949 | AB037823  | CSGlcA-T | 19 | 8 | 0.9965422969 | Chondroitin sulfate glucuronyltransferase                                                |
| 950 | NM_001923 | DDB1     | 19 | 8 | 0.9965295713 | Damage-specific DNA binding protein 1, 127kDa                                            |
| 951 | NM_016640 | MRPS30   | 19 | 8 | 0.9965068257 | Mitochondrial ribosomal protein S30                                                      |
| 952 | NM_006546 | IMP-1    | 19 | 8 | 0.9964814310 | IGF-II mRNA-binding protein 1                                                            |
| 953 | AB029001  | KIAA1078 | 18 | 7 | 0.9964771386 | Calmodulin regulated spectrin-associated protein 1-like 1                                |
| 954 | L05093    | RPL18A   | 19 | 8 | 0.9964717979 | Ribosomal protein L18a                                                                   |
| 955 | D86978    | NUP205   | 19 | 8 | 0.9964677267 | Nucleoporin 205kDa                                                                       |

|     |           |           |    |   |              |                                                                                                      |
|-----|-----------|-----------|----|---|--------------|------------------------------------------------------------------------------------------------------|
| 956 | AL049377  |           | 11 | 5 | 0.9964650932 | MRNA; cDNA DKFZp586H0718 (from clone DKFZp586H0718)                                                  |
| 957 | L08440    | FLJ25778  | 12 | 5 | 0.9964200426 | Hypothetical protein FLJ25778                                                                        |
| 958 | NM_002991 | CCL24     | 15 | 6 | 0.9964116561 | Chemokine (C-C motif) ligand 24                                                                      |
| 959 | AK021918  | GPR172A   | 17 | 8 | 0.9964035048 | G protein-coupled receptor 172A                                                                      |
| 960 | AK023527  | MMRN2     | 19 | 8 | 0.9963411705 | Multimerin 2                                                                                         |
| 961 | NM_016489 | NT5C3     | 18 | 8 | 0.9963382768 | 5'-nucleotidase, cytosolic III                                                                       |
| 962 | NM_020164 | ASPH      | 19 | 8 | 0.9963381362 | Aspartate beta-hydroxylase                                                                           |
| 963 | NM_003255 | TIMP2     | 19 | 8 | 0.9963085272 | Tissue inhibitor of metalloproteinase 2                                                              |
| 964 | NM_006452 | PAICS     | 19 | 8 | 0.9963021860 | Phosphoribosylaminoimidazole carboxylase, phosphoribosylaminoimidazole succinocarboxamide synthetase |
| 965 | NM_000797 | DRD4      | 18 | 5 | 0.9962975845 | Dopamine receptor D4                                                                                 |
| 966 | NM_017698 |           | 19 | 8 | 0.9962806366 | Data not found                                                                                       |
| 967 | NM_019095 | C20orf155 | 19 | 8 | 0.9962716692 | Chromosome 20 open reading frame 155                                                                 |
| 968 | NM_018135 | MRPS18A   | 19 | 8 | 0.9962439293 | Mitochondrial ribosomal protein S18A                                                                 |
| 969 | NM_013271 | PCSK1N    | 18 | 8 | 0.9962369974 | Proprotein convertase subtilisin/kexin type 1 inhibitor                                              |
| 970 | NM_016490 | LOC51252  | 19 | 8 | 0.9962336655 | Hypothetical protein LOC51252                                                                        |
| 971 | NM_006443 | C6orf108  | 19 | 8 | 0.9962155724 | Chromosome 6 open reading frame 108                                                                  |
| 972 | NM_005520 | HNRPH1    | 19 | 8 | 0.9962145437 | Heterogeneous nuclear ribonucleoprotein H1 (H)                                                       |
| 973 | NM_006392 | NOL5A     | 19 | 8 | 0.9962105764 | Nucleolar protein 5A (56kDa with KKE/D repeat)                                                       |
| 974 | NM_004848 | C1orf38   | 19 | 8 | 0.9961880882 | Chromosome 1 open reading frame 38                                                                   |
| 975 | NM_005005 | NDUFB9    | 19 | 8 | 0.9961785700 | NADH dehydrogenase (ubiquinone) 1 beta subcomplex, 9, 22kDa                                          |
| 976 | NM_018159 | NUDT11    | 19 | 8 | 0.9961719862 | Nudix (nucleoside diphosphate linked moiety X)-type motif 11                                         |
| 977 | NM_004591 | CCL20     | 18 | 7 | 0.9961650541 | Chemokine (C-C motif) ligand 20                                                                      |
| 978 | NM_003928 | CXX1      | 19 | 8 | 0.9961632205 | CAAX box 1                                                                                           |
| 979 | NM_016437 | TUBG2     | 19 | 7 | 0.9961553608 | Tubulin, gamma 2                                                                                     |
| 980 | AK022212  | GSDMDC1   | 19 | 8 | 0.9961503580 | Gasdermin domain containing 1                                                                        |
| 981 | NM_007361 | NID2      | 18 | 8 | 0.9961486445 | Nidogen 2 (osteonidogen)                                                                             |
| 982 | NM_001758 |           | 19 | 8 | 0.9961163902 | Data not found                                                                                       |
| 983 | AB018264  | TSPYL4    | 19 | 8 | 0.9961151360 | TSPY-like 4                                                                                          |
| 984 | NM_000493 | COL10A1   | 17 | 8 | 0.9961131010 | Collagen, type X, alpha 1(Schmid metaphyseal chondrodysplasia)                                       |
| 985 | Y13871    | LOC202181 | 19 | 8 | 0.9961053632 | Similar to FLJ44216 protein; similar to cell surface antigen                                         |
| 986 | NM_014944 | CLSTN1    | 19 | 8 | 0.9961014952 | Calsyntenin 1                                                                                        |
| 987 | NM_007254 | PNKP      | 19 | 8 | 0.9960625915 | Polynucleotide kinase 3'-phosphatase                                                                 |
| 988 | AB032986  |           | 19 | 8 | 0.9960605641 | Data not found                                                                                       |

|      |           |          |    |   |              |                                                                          |
|------|-----------|----------|----|---|--------------|--------------------------------------------------------------------------|
| 989  | NM_005022 | PFN1     | 14 | 8 | 0.9960577128 | Profilin 1                                                               |
| 990  | X52354    | ZNF551   | 19 | 8 | 0.9960346548 | Zinc finger protein 551                                                  |
| 991  | NM_017825 | ADPRHL2  | 19 | 8 | 0.9960309843 | ADP-ribosylhydrolase like 2                                              |
| 992  | NM_006397 | RNASEH2A | 18 | 8 | 0.9960301766 | Ribonuclease H2, large subunit                                           |
| 993  | NM_006184 | NUCB1    | 19 | 8 | 0.9960217036 | Nucleobindin 1                                                           |
| 994  | AK026383  |          | 19 | 8 | 0.9959945004 | Data not found                                                           |
| 995  | L15557    | RNU15B   | 14 | 8 | 0.9959825801 | RNA, U15b small nucleolar                                                |
| 996  | AK023251  | C6orf155 | 14 | 7 | 0.9959781767 | Chromosome 6 open reading frame 155                                      |
| 997  | NM_018492 | PBK      | 14 | 8 | 0.9959571033 | PDZ binding kinase                                                       |
| 998  | NM_018513 |          | 19 | 8 | 0.9959317652 | Data not found                                                           |
| 999  | NM_014363 | SACS     | 19 | 8 | 0.9959297413 | Spastic ataxia of Charlevoix-Saguenay (sacsin)                           |
| 1000 | NM_014630 | ZNF592   | 19 | 8 | 0.9959270195 | Zinc finger protein 592                                                  |
| 1001 | NM_004068 | AP2M1    | 19 | 8 | 0.9959033847 | Adaptor-related protein complex 2, mu 1 subunit                          |
| 1002 | NM_014500 | HTATSF1  | 19 | 8 | 0.9959027130 | HIV TAT specific factor 1                                                |
| 1003 | NM_005340 | HINT1    | 14 | 8 | 0.9958941329 | Histidine triad nucleotide binding protein 1                             |
| 1004 | NM_016209 | HSPC176  | 19 | 8 | 0.9958934509 | Hematopoietic stem/progenitor cells 176                                  |
| 1005 | AK001299  |          | 19 | 8 | 0.9958922436 | Data not found                                                           |
| 1006 | NM_001895 | CSNK2A1  | 19 | 8 | 0.9958920047 | Casein kinase 2, alpha 1 polypeptide                                     |
| 1007 | NM_000255 | MUT      | 19 | 7 | 0.9958907491 | Methylmalonyl Coenzyme A mutase                                          |
| 1008 | NM_015599 | PGM3     | 19 | 8 | 0.9958675676 | Phosphoglucomutase 3                                                     |
| 1009 | Y10510    |          | 19 | 6 | 0.9958183513 | Data not found                                                           |
| 1010 | NM_005898 | M11S1    | 18 | 8 | 0.9958126407 | Membrane component, chromosome 11, surface marker 1                      |
| 1011 | NM_002415 | MIF      | 19 | 8 | 0.9958109008 | Macrophage migration inhibitory factor (glycosylation-inhibiting factor) |
| 1012 | NM_006985 | NPIP     | 19 | 8 | 0.9957950256 | Hypothetical protein LOC339047                                           |
| 1013 | NM_006148 | LASP1    | 19 | 7 | 0.9957596134 | LIM and SH3 protein 1                                                    |
| 1014 | AK026793  | DNAH3    | 16 | 5 | 0.9957445910 | Dynein, axonemal, heavy polypeptide 3                                    |
| 1015 | NM_005500 | SAE1     | 19 | 7 | 0.9957301075 | SUMO-1 activating enzyme subunit 1                                       |
| 1016 | NM_001503 | GPLD1    | 19 | 8 | 0.9957206763 | Glycosylphosphatidylinositol specific phospholipase D1                   |
| 1017 | NM_012253 | TKTL1    | 19 | 8 | 0.9957128266 | Transketolase-like 1                                                     |
| 1018 | AB046840  | PRX      | 18 | 8 | 0.9956959933 | Periaxin                                                                 |
| 1019 | NM_001020 | RPS16    | 19 | 8 | 0.9956773967 | Ribosomal protein S16                                                    |
| 1020 | NM_006463 | STAMBP   | 19 | 8 | 0.9956684030 | STAM binding protein                                                     |
| 1021 | AF295378  | MAGEF1   | 18 | 7 | 0.9956606247 | Melanoma antigen family F, 1                                             |

|      |           |           |    |   |              |                                                                                                                       |
|------|-----------|-----------|----|---|--------------|-----------------------------------------------------------------------------------------------------------------------|
| 1022 | NM_000735 | CGA       | 17 | 8 | 0.9956297823 | Glycoprotein hormones, alpha polypeptide                                                                              |
| 1023 | NM_004446 | EPRS      | 19 | 8 | 0.9956291159 | Glutamyl-prolyl-tRNA synthetase                                                                                       |
| 1024 | NM_005245 | FAT       | 13 | 8 | 0.9956115570 | FAT tumor suppressor homolog 1 (Drosophila)                                                                           |
| 1025 | NM_000187 | HGD       | 19 | 8 | 0.9956079613 | Homogentisate 1,2-dioxygenase (homogentisate oxidase)                                                                 |
| 1026 | AF297709  | SCYL1     | 19 | 8 | 0.9955985861 | SCY1-like 1 (S. cerevisiae)                                                                                           |
| 1027 | NM_014882 | ARHGAP25  | 17 | 5 | 0.9955504657 | Rho GTPase activating protein 25                                                                                      |
| 1028 | NM_013363 | PCOLCE2   | 19 | 8 | 0.9955271542 | Procollagen C-endopeptidase enhancer 2                                                                                |
| 1029 | AF086494  | HSDL2     | 19 | 8 | 0.9955184592 | Hydroxysteroid dehydrogenase like 2                                                                                   |
| 1030 | NM_004165 | RRAD      | 19 | 8 | 0.9954938610 | Ras-related associated with diabetes                                                                                  |
| 1031 | NM_000122 | ERCC3     | 19 | 8 | 0.9954890778 | Excision repair cross-complementing rodent repair deficiency, complementation group 3 (xeroderma pigmentosum group 3) |
| 1032 | NM_004724 | ZW10      | 19 | 8 | 0.9954833928 | ZW10, kinetochore associated, homolog (Drosophila)                                                                    |
| 1033 | AL162073  |           | 15 | 6 | 0.9954776145 | MRNA; cDNA DKFZp762K056 (from clone DKFZp762K056)                                                                     |
| 1034 | AL357202  | MAN1A1    | 16 | 5 | 0.9954764993 | Mannosidase, alpha, class 1A, member 1                                                                                |
| 1035 | NM_001622 | AHSG      | 15 | 6 | 0.9954746498 | Alpha-2-HS-glycoprotein                                                                                               |
| 1036 | J04621    | SDC2      | 18 | 7 | 0.9954507231 | Syndecan 2 (heparan sulfate proteoglycan 1, cell surface-associated, fibroglycan)                                     |
| 1037 | NM_004636 | SEMA3B    | 17 | 7 | 0.9954404264 | Sema domain, immunoglobulin domain (Ig), short basic domain, secreted, (semaphorin) 3B                                |
| 1038 | NM_014029 |           | 19 | 8 | 0.9954184189 | Data not found                                                                                                        |
| 1039 | NM_002933 | RNASE1    | 18 | 8 | 0.9954114596 | Ribonuclease, RNase A family, 1 (pancreatic)                                                                          |
| 1040 | AK025662  | SHCBP1    | 16 | 7 | 0.9954109120 | SHC SH2-domain binding protein 1                                                                                      |
| 1041 | AF130090  | C21orf116 | 18 | 8 | 0.9953443251 | Chromosome 21 open reading frame 116                                                                                  |
| 1042 | NM_012200 | B3GAT3    | 18 | 8 | 0.9953358552 | Beta-1,3-glucuronyltransferase 3 (glucuronosyltransferase I)                                                          |
| 1043 | AK025425  | MK2S4     | 19 | 8 | 0.9953109405 | RCSD domain containing 1                                                                                              |
| 1044 | NM_018081 | FLJ10385  | 19 | 7 | 0.9953068793 | Hypothetical protein FLJ10385                                                                                         |
| 1045 | NM_018026 | PACS1     | 19 | 8 | 0.9953008758 | Phosphofurin acidic cluster sorting protein 1                                                                         |
| 1046 | NM_003330 | TXNRD1    | 19 | 8 | 0.9952877490 | Thioredoxin reductase 1                                                                                               |
| 1047 | NM_017914 | C19orf24  | 19 | 8 | 0.9952643675 | Chromosome 19 open reading frame 24                                                                                   |
| 1048 | NM_002852 | PTX3      | 17 | 5 | 0.9952552510 | Pentraxin-related gene, rapidly induced by IL-1 beta                                                                  |
| 1049 | NM_002157 | HSPE1     | 18 | 8 | 0.9952515947 | Heat shock 10kDa protein 1 (chaperonin 10)                                                                            |
| 1050 | AB048791  | HES4      | 19 | 8 | 0.9952215849 | Hairy and enhancer of split 4 (Drosophila)                                                                            |
| 1051 | NM_004559 | NSEP1     | 18 | 8 | 0.9952115958 | Nuclease sensitive element binding protein 1                                                                          |
| 1052 | NM_002759 | EIF2AK2   | 19 | 8 | 0.9951749210 | Eukaryotic translation initiation factor 2-alpha kinase 2                                                             |
| 1053 | M62324    | ARID5A    | 19 | 8 | 0.9951747405 | AT rich interactive domain 5A (MRF1-like)                                                                             |
| 1054 | AF132362  | HNRPH3    | 18 | 8 | 0.9951464019 | Heterogeneous nuclear ribonucleoprotein H3 (2H9)                                                                      |



|      |           |          |    |   |              |                                                                                 |
|------|-----------|----------|----|---|--------------|---------------------------------------------------------------------------------|
| 1055 | AB040960  | ALPK1    | 18 | 8 | 0.9951361476 | Alpha-kinase 1                                                                  |
| 1056 | NM_007375 | TARDBP   | 19 | 8 | 0.9951204661 | TAR DNA binding protein                                                         |
| 1057 | NM_018983 | NOLA1    | 19 | 8 | 0.9951153920 | Nucleolar protein family A, member 1 (H/ACA small nucleolar RNPs)               |
| 1058 | AF116620  |          | 19 | 8 | 0.9950922164 | Data not found                                                                  |
| 1059 | NM_006302 | GCS1     | 19 | 8 | 0.9950908863 | Glucosidase I                                                                   |
| 1060 | AB037742  | 182-FIP  | 19 | 8 | 0.9950903435 | 82-kD FMRP Interacting Protein                                                  |
| 1061 | NM_003092 | SNRPB2   | 19 | 8 | 0.9950605387 | Small nuclear ribonucleoprotein polypeptide B"                                  |
| 1062 | NM_012249 | RHOQ     | 18 | 8 | 0.9950375119 | Ras homolog gene family, member Q                                               |
| 1063 | NM_001567 | INPPL1   | 19 | 8 | 0.9950194242 | Inositol polyphosphate phosphatase-like 1                                       |
| 1064 | NM_003541 | HIST1H4K | 17 | 6 | 0.9950003110 | Histone 1, H4k                                                                  |
| 1065 | X67155    | KIF23    | 18 | 8 | 0.9949948898 | Kinesin family member 23                                                        |
| 1066 | NM_014912 | CPEB3    | 19 | 8 | 0.9949534040 | Cytoplasmic polyadenylation element binding protein 3                           |
| 1067 | NM_000437 | PAFAH2   | 19 | 8 | 0.9949467979 | Platelet-activating factor acetylhydrolase 2, 40kDa                             |
| 1068 | NM_001281 | CKAP1    | 19 | 8 | 0.9949399428 | Cytoskeleton associated protein 1                                               |
| 1069 | NM_005757 |          | 19 | 8 | 0.9949255365 | Data not found                                                                  |
| 1070 | NM_005182 | CA7      | 19 | 8 | 0.9949231896 | Carbonic anhydrase VII                                                          |
| 1071 | NM_006049 | SNAPC5   | 18 | 7 | 0.9949203937 | Small nuclear RNA activating complex, polypeptide 5, 19kDa                      |
| 1072 | Z36846    | DR1      | 19 | 7 | 0.9949059688 | Down-regulator of transcription 1, TBP-binding (negative cofactor 2)            |
| 1073 | NM_005816 | CD96     | 15 | 6 | 0.9948958892 | CD96 antigen                                                                    |
| 1074 | NM_001106 | ACVR2B   | 19 | 8 | 0.9948716253 | Activin A receptor, type IIB                                                    |
| 1075 | AL390180  | CENTG2   | 12 | 6 | 0.9948713235 | Centaurin, gamma 2                                                              |
| 1076 | NM_014300 | SEC11L1  | 18 | 8 | 0.9948478010 | SEC11-like 1 ( <i>S. cerevisiae</i> )                                           |
| 1077 | AL137241  | ZNF643   | 19 | 8 | 0.9948455612 | Zinc finger protein 643                                                         |
| 1078 | K03200    |          | 19 | 8 | 0.9948438123 | Data not found                                                                  |
| 1079 | AK024415  | ADCY1    | 17 | 7 | 0.9948085668 | Adenylate cyclase 1 (brain)                                                     |
| 1080 | NM_015836 | WARS2    | 18 | 8 | 0.9947990483 | Tryptophanyl tRNA synthetase 2 (mitochondrial)                                  |
| 1081 | NM_018223 | CHFR     | 19 | 8 | 0.9947890931 | Checkpoint with forkhead and ring finger domains                                |
| 1082 | NM_006750 | SNTB2    | 19 | 8 | 0.9947632840 | Syntrophin, beta 2 (dystrophin-associated protein A1, 59kDa, basic component 2) |
| 1083 | NM_002268 | KPNA4    | 19 | 8 | 0.9947401509 | Karyopherin alpha 4 (importin alpha 3)                                          |
| 1084 | NM_001536 | HRMT1L2  | 19 | 8 | 0.9947304114 | HMT1 hnRNP methyltransferase-like 2 ( <i>S. cerevisiae</i> )                    |
| 1085 | NM_001912 | CTSL     | 18 | 8 | 0.9947271405 | Cathepsin L-like 3                                                              |
| 1086 | AB033041  | VANGL2   | 19 | 8 | 0.9947211252 | Vang-like 2 (van gogh, <i>Drosophila</i> )                                      |
| 1087 | NM_002819 | PTBP1    | 19 | 8 | 0.9946819763 | Polypyrimidine tract binding protein 1                                          |

|      |           |         |    |   |              |                                                                                             |
|------|-----------|---------|----|---|--------------|---------------------------------------------------------------------------------------------|
| 1088 | Y10529    |         | 19 | 8 | 0.9946139749 | Putative olfactory receptor (clone ht2)                                                     |
| 1089 | NM_018990 | CXorf9  | 19 | 8 | 0.9945932319 | Chromosome X open reading frame 9                                                           |
| 1090 | AB037787  | NLGN2   | 19 | 8 | 0.9945887411 | Neurologin 2                                                                                |
| 1091 | NM_000228 | LAMB3   | 16 | 7 | 0.9945520524 | Laminin, beta 3                                                                             |
| 1092 | NM_018574 |         | 19 | 8 | 0.9945508560 | Data not found                                                                              |
| 1093 | NM_015963 | THAP4   | 19 | 8 | 0.9945203289 | THAP domain containing 4                                                                    |
| 1094 | AF035191  | NASP    | 18 | 8 | 0.9944989472 | Nuclear autoantigenic sperm protein (histone-binding)                                       |
| 1095 | NM_006666 | RUVBL2  | 17 | 8 | 0.9944884290 | RuvB-like 2 (E. coli)                                                                       |
| 1096 | NM_003906 | MCM3AP  | 19 | 8 | 0.9944821960 | MCM3 minichromosome maintenance deficient 3 (S. cerevisiae) associated protein              |
| 1097 | NM_001933 | DLST    | 19 | 8 | 0.9944758195 | Dihydrolipoamide S-succinyltransferase (E2 component of 2-oxo-glutarate complex)            |
| 1098 | M97191    | SP3     | 16 | 8 | 0.9944156005 | Sp3 transcription factor                                                                    |
| 1099 | NM_000032 | ALAS2   | 17 | 8 | 0.9944079044 | Aminolevulinate, delta-, synthase 2 (sideroblastic/hypochromic anemia)                      |
| 1100 | NM_002434 | MPG     | 19 | 8 | 0.9944002881 | N-methylpurine-DNA glycosylase                                                              |
| 1101 | NM_006475 | POSTN   | 18 | 8 | 0.9943857696 | Periostin, osteoblast specific factor                                                       |
| 1102 | NM_004866 | SCAMP1  | 19 | 8 | 0.9943814197 | Secretory carrier membrane protein 1                                                        |
| 1103 | S82470    | LENG4   | 17 | 8 | 0.9943470359 | Leukocyte receptor cluster (LRC) member 4                                                   |
| 1104 | NM_005875 | GC20    | 19 | 8 | 0.9943454355 | Translation factor sui1 homolog                                                             |
| 1105 | AB002331  | DATF1   | 18 | 8 | 0.9943431160 | Death associated transcription factor 1                                                     |
| 1106 | NM_006263 | PSME1   | 19 | 8 | 0.9943400086 | Proteasome (prosome, macropain) activator subunit 1 (PA28 alpha)                            |
| 1107 | NM_001533 | HNRPL   | 19 | 8 | 0.9943299533 | Heterogeneous nuclear ribonucleoprotein L                                                   |
| 1108 | AK025999  | E2-230K | 19 | 8 | 0.9943157768 | Likely ortholog of mouse ubiquitin-conjugating enzyme E2-230K                               |
| 1109 | X98507    |         | 18 | 8 | 0.9942985361 | Data not found                                                                              |
| 1110 | AK000653  | CRB3    | 19 | 8 | 0.9942438085 | Crumbs homolog 3 (Drosophila)                                                               |
| 1111 | NM_006347 | PPIH    | 19 | 8 | 0.9942333425 | Peptidyl prolyl isomerase H (cyclophilin H)                                                 |
| 1112 | NM_003321 | TUFM    | 19 | 8 | 0.9942320662 | Tu translation elongation factor, mitochondrial                                             |
| 1113 | NM_002029 | FPR1    | 16 | 5 | 0.9942100792 | Formyl peptide receptor 1                                                                   |
| 1114 | NM_012245 | SKIIP   | 19 | 8 | 0.9941645397 | SKI interacting protein                                                                     |
| 1115 | D87666    |         | 19 | 8 | 0.9941489237 | Data not found                                                                              |
| 1116 | M29581    | ZNF8    | 19 | 8 | 0.9941424174 | Zinc finger protein 8 (clone HF.18)                                                         |
| 1117 | AK000257  | TTLL2   | 14 | 7 | 0.9941000478 | Tubulin tyrosine ligase-like family, member 2                                               |
| 1118 | NM_016594 | FKBP11  | 19 | 8 | 0.9940975222 | FK506 binding protein 11, 19 kDa                                                            |
| 1119 | AF090097  | ANTXR1  | 15 | 5 | 0.9940799696 | Anthrax toxin receptor 1                                                                    |
| 1120 | NM_004612 | TGFBR1  | 17 | 6 | 0.9940447685 | Transforming growth factor, beta receptor I (activin A receptor type II-like kinase, 53kDa) |

|      |           |               |    |   |              |                                                                                |
|------|-----------|---------------|----|---|--------------|--------------------------------------------------------------------------------|
| 1121 | NM_002388 | MCM3          | 19 | 8 | 0.9940352236 | MCM3 minichromosome maintenance deficient 3 ( <i>S. cerevisiae</i> )           |
| 1122 | NM_001897 | CSPG4         | 16 | 7 | 0.9940256173 | Chondroitin sulfate proteoglycan 4 (melanoma-associated)                       |
| 1123 | AB046815  | DDX55         | 19 | 8 | 0.9940206224 | DEAD (Asp-Glu-Ala-Asp) box polypeptide 55                                      |
| 1124 | NM_014468 | VENTX2        | 18 | 8 | 0.9940054310 | VENT-like homeobox 2                                                           |
| 1125 | AB040957  | KIAA1524      | 18 | 7 | 0.9939824120 | KIAA1524                                                                       |
| 1126 | NM_003983 | SLC7A6        | 18 | 8 | 0.9939747903 | Solute carrier family 7 (cationic amino acid transporter, y+ system), member 6 |
| 1127 | NM_017994 | FLJ10099      | 16 | 8 | 0.9939648206 | Hypothetical protein FLJ10099                                                  |
| 1128 | D28450    | H2AFZ         | 19 | 8 | 0.9939489061 | H2A histone family, member Z                                                   |
| 1129 | NM_001269 | CHC1          | 18 | 7 | 0.9939154569 | Regulator of chromosome condensation 1                                         |
| 1130 | AF300648  | GNB4          | 19 | 8 | 0.9939064020 | Guanine nucleotide binding protein (G protein), beta polypeptide 4             |
| 1131 | NM_005529 | HSPG2         | 19 | 8 | 0.9939009742 | Heparan sulfate proteoglycan 2 (perlecan)                                      |
| 1132 | NM_012261 | C20orf103     | 19 | 8 | 0.9938873812 | Chromosome 20 open reading frame 103                                           |
| 1133 | NM_018010 | ESRRBL1       | 19 | 8 | 0.9938360344 | Estrogen-related receptor beta like 1                                          |
| 1134 | AK023807  | ANAPC1        | 19 | 8 | 0.9938222090 | Anaphase promoting complex subunit 1                                           |
| 1135 | NM_000320 | QDPR          | 19 | 8 | 0.9938219353 | Quinoid dihydropteridine reductase                                             |
| 1136 | AK022404  | DKFZp566H0824 | 16 | 6 | 0.9938182544 | Hypothetical protein DKFZp566H0824                                             |
| 1137 | D16914    |               | 19 | 8 | 0.9937974671 | Data not found                                                                 |
| 1138 | Y10511    |               | 18 | 8 | 0.9937952667 | Data not found                                                                 |
| 1139 | AF010236  | SGCD          | 16 | 7 | 0.9937776570 | Sarcoglycan, delta (35kDa dystrophin-associated glycoprotein)                  |
| 1140 | NM_005264 | GFRA1         | 19 | 8 | 0.9937677508 | GDNF family receptor alpha 1                                                   |
| 1141 | NM_006389 | HYOU1         | 17 | 8 | 0.9937292181 | Hypoxia up-regulated 1                                                         |
| 1142 | NM_013327 | PARVB         | 19 | 8 | 0.9937191263 | Parvin, beta                                                                   |
| 1143 | AL049435  |               | 14 | 6 | 0.9936672094 | MRNA: cDNA DKFZp586B0220 (from clone DKFZp586B0220)                            |
| 1144 | AL137461  | COL23A1       | 16 | 6 | 0.9936473688 | Collagen, type XXIII, alpha 1                                                  |
| 1145 | NM_004796 | NRXN3         | 18 | 6 | 0.9936338057 | Neurexin 3                                                                     |
| 1146 | U82987    | BBC3          | 19 | 7 | 0.9936295882 | BCL2 binding component 3                                                       |
| 1147 | Z83941    | LRRRC16       | 14 | 5 | 0.9936207266 | Leucine rich repeat containing 16                                              |
| 1148 | NM_004818 | DDX23         | 19 | 8 | 0.9936075615 | DEAD (Asp-Glu-Ala-Asp) box polypeptide 23                                      |
| 1149 | NM_003096 | SNRPG         | 19 | 8 | 0.9935593657 | Small nuclear ribonucleoprotein polypeptide G                                  |
| 1150 | NM_017746 | TEX10         | 19 | 6 | 0.9935544750 | Testis expressed sequence 10                                                   |
| 1151 | NM_012139 | DELGEF        | 19 | 6 | 0.9935256472 | Deafness locus associated putative guanine nucleotide exchange factor          |
| 1152 | NM_007348 | ATF6          | 17 | 8 | 0.9935189798 | Activating transcription factor 6                                              |
| 1153 | D17271    |               | 18 | 8 | 0.9934834119 | Data not found                                                                 |

|      |           |            |    |   |              |                                                                |
|------|-----------|------------|----|---|--------------|----------------------------------------------------------------|
| 1154 | NM_004461 | FARSLA     | 19 | 8 | 0.9933908174 | Phenylalanine-tRNA synthetase-like, alpha subunit              |
| 1155 | NM_018085 | IPO9       | 19 | 8 | 0.9933898819 | Importin 9                                                     |
| 1156 | M37033    | CD53       | 17 | 8 | 0.9933552163 | CD53 antigen                                                   |
| 1157 | NM_004704 | RNU3IP2    | 17 | 8 | 0.9933482595 | RNA, U3 small nucleolar interacting protein 2                  |
| 1158 | NM_004813 | PEX16      | 19 | 8 | 0.9933168954 | Peroxisomal biogenesis factor 16                               |
| 1159 | NM_002482 | NASP       | 17 | 8 | 0.9932947698 | Nuclear autoantigenic sperm protein (histone-binding)          |
| 1160 | AF055027  | CARM1      | 19 | 8 | 0.9932664303 | Coactivator-associated arginine methyltransferase 1            |
| 1161 | NM_002954 | RPS27A     | 19 | 8 | 0.9932635240 | Ribosomal protein S27a                                         |
| 1162 | NM_006235 | POU2AF1    | 18 | 7 | 0.9932228183 | POU domain, class 2, associating factor 1                      |
| 1163 | NM_020188 | DC13       | 19 | 8 | 0.9931909939 | DC13 protein                                                   |
| 1164 | NM_018215 | FLJ10781   | 19 | 8 | 0.9931895112 | Hypothetical protein FLJ10781                                  |
| 1165 | NM_000068 | CACNA1A    | 14 | 6 | 0.9931719438 | Calcium channel, voltage-dependent, P/Q type, alpha 1A subunit |
| 1166 | AK023214  |            | 19 | 8 | 0.9931370045 | Data not found                                                 |
| 1167 | Z24724    | ATP13A3    | 18 | 8 | 0.9930793764 | ATPase type 13A3                                               |
| 1168 | NM_001237 | CCNA2      | 18 | 8 | 0.9930638832 | Cyclin A2                                                      |
| 1169 | NM_014730 | KIAA0152   | 14 | 8 | 0.9930581586 | KIAA0152                                                       |
| 1170 | NM_006166 | NFYB       | 18 | 8 | 0.9930516466 | Nuclear transcription factor Y, beta                           |
| 1171 | NM_018289 | FLJ10979   | 19 | 8 | 0.9930150962 | Hypothetical protein FLJ10979                                  |
| 1172 | NM_017767 | SLC39A4    | 19 | 8 | 0.9929992383 | Solute carrier family 39 (zinc transporter), member 4          |
| 1173 | NM_001327 | CTAG1B     | 19 | 8 | 0.9929815568 | Cancer/testis antigen 1B                                       |
| 1174 | NM_012336 | NARF       | 19 | 8 | 0.9929813105 | Nuclear prelamin A recognition factor                          |
| 1175 | NM_016448 | RAMP       | 19 | 8 | 0.9929789431 | Denticleless homolog (Drosophila)                              |
| 1176 | NM_004725 | BUB3       | 19 | 8 | 0.9929608270 | BUB3 budding uninhibited by benzimidazoles 3 homolog (yeast)   |
| 1177 | NM_001328 | CTBP1      | 19 | 8 | 0.9929415894 | C-terminal binding protein 1                                   |
| 1178 | NM_002175 | IFNA21     | 18 | 5 | 0.9929406145 | Interferon, alpha 21                                           |
| 1179 | AK024969  | VMP1       | 19 | 8 | 0.9929087464 | Transmembrane protein 49                                       |
| 1180 | AK025800  | NUPL1      | 19 | 8 | 0.9929003106 | Nucleoporin like 1                                             |
| 1181 | AF086516  | MGC22793   | 18 | 6 | 0.9928591049 | Hypothetical protein MGC22793                                  |
| 1182 | NM_003176 | SYCP1      | 19 | 8 | 0.9927513250 | Synaptonemal complex protein 1                                 |
| 1183 | NM_015934 | NOP5/NOP58 | 19 | 8 | 0.9927158050 | Nucleolar protein NOP5/NOP58                                   |
| 1184 | NM_013317 |            | 18 | 8 | 0.9927011649 | Data not found                                                 |
| 1185 | NM_001521 | GTF3C2     | 19 | 8 | 0.9926979201 | General transcription factor IIIC, polypeptide 2, beta 110kDa  |
| 1186 | AK026288  | FLJ22635   | 19 | 8 | 0.9926902557 | Hypothetical protein FLJ22635                                  |

|      |           |           |    |   |              |                                                                      |
|------|-----------|-----------|----|---|--------------|----------------------------------------------------------------------|
| 1187 | NM_004500 | HNRPC     | 19 | 8 | 0.9926731256 | Heterogeneous nuclear ribonucleoprotein C (C1/C2)                    |
| 1188 | NM_002611 | PDK2      | 19 | 8 | 0.9926698682 | Pyruvate dehydrogenase kinase, isoenzyme 2                           |
| 1189 | NM_001568 | EIF3S6    | 19 | 8 | 0.9926604677 | Eukaryotic translation initiation factor 3, subunit 6 48kDa          |
| 1190 | NM_015535 | DNAPTP6   | 19 | 8 | 0.9925823060 | DNA polymerase-transactivated protein 6                              |
| 1191 | AB000509  | TRAF5     | 18 | 6 | 0.9925608723 | TNF receptor-associated factor 5                                     |
| 1192 | NM_001817 |           | 17 | 8 | 0.9925586465 | Data not found                                                       |
| 1193 | AK001903  | INHBA     | 13 | 5 | 0.9925527121 | Inhibin, beta A (activin A, activin AB alpha polypeptide)            |
| 1194 | NM_007245 | ATXN2L    | 18 | 8 | 0.9925334767 | Ataxin 2-like                                                        |
| 1195 | NM_004204 | PIGQ      | 19 | 8 | 0.9925211308 | Phosphatidylinositol glycan, class Q                                 |
| 1196 | AK001058  |           | 17 | 6 | 0.9925165000 | CDNA FLJ10196 fis, clone HEMBA1004776                                |
| 1197 | NM_017432 | PTOV1     | 19 | 7 | 0.9924934444 | Prostate tumor overexpressed gene 1                                  |
| 1198 | L36587    |           | 19 | 8 | 0.9924874594 | Data not found                                                       |
| 1199 | AF142421  |           | 19 | 8 | 0.9924398175 | Data not found                                                       |
| 1200 | AK022667  | FLJ11712  | 19 | 7 | 0.9924337402 | Hypothetical protein FLJ11712                                        |
| 1201 | NM_016292 | TRAP1     | 19 | 8 | 0.9924227942 | TNF receptor-associated protein 1                                    |
| 1202 | S74678    | HNRPK     | 17 | 8 | 0.9924157572 | Heterogeneous nuclear ribonucleoprotein K                            |
| 1203 | NM_003653 | COPS3     | 15 | 7 | 0.9924021221 | COP9 constitutive photomorphogenic homolog subunit 3 (Arabidopsis)   |
| 1204 | AF164963  | VENTX2P1  | 17 | 5 | 0.9923971343 | VENT-like homeobox 2 pseudogene 1                                    |
| 1205 | NM_006928 | SILV      | 16 | 8 | 0.9923568407 | Silver homolog (mouse)                                               |
| 1206 | NM_013270 | TSP50     | 19 | 8 | 0.9923429567 | Testes-specific protease 50                                          |
| 1207 | NM_012204 | GTF3C4    | 15 | 7 | 0.9923321719 | General transcription factor IIIC, polypeptide 4, 90kDa              |
| 1208 | AF130069  | LOC90799  | 17 | 6 | 0.9922887624 | Hypothetical protein BC009518                                        |
| 1209 | AF131786  |           | 17 | 5 | 0.9922870513 | Clone 25220 mRNA sequence                                            |
| 1210 | NM_005072 | SLC12A4   | 18 | 7 | 0.9922833787 | Solute carrier family 12 (potassium/chloride transporters), member 4 |
| 1211 | AK000745  | LYRIC     | 19 | 8 | 0.9922772836 | Metadherin                                                           |
| 1212 | NM_003103 | SON       | 19 | 8 | 0.9922687346 | SON DNA binding protein                                              |
| 1213 | AK024601  | FAM3A     | 19 | 8 | 0.9922617514 | Family with sequence similarity 3, member A                          |
| 1214 | AF086307  | LOC115098 | 19 | 8 | 0.9922411072 | Hypothetical protein BC013949                                        |
| 1215 | NM_019116 | KIAA1970  | 19 | 7 | 0.9921961165 | KIAA1970 protein                                                     |
| 1216 | AK022010  |           | 17 | 5 | 0.9921952145 | Data not found                                                       |
| 1217 | NM_004221 | NK4       | 14 | 5 | 0.9921582942 | Interleukin 32                                                       |
| 1218 | AF272043  | ITM2C     | 17 | 8 | 0.9921536440 | Integral membrane protein 2C                                         |
| 1219 | NM_017964 | SLC30A6   | 18 | 6 | 0.9921500996 | Solute carrier family 30 (zinc transporter), member 6                |

|      |           |          |        |    |   |              |                                                                                                                          |
|------|-----------|----------|--------|----|---|--------------|--------------------------------------------------------------------------------------------------------------------------|
| 1220 | NM_016938 | EFEMP2   |        | 15 | 5 | 0.9921262382 | EGF-containing fibulin-like extracellular matrix protein 2                                                               |
| 1221 | M14624    |          |        | 11 | 5 | 0.9921243686 | Data not found                                                                                                           |
| 1222 | NM_018243 |          | 11-Sep | 18 | 8 | 0.9921234773 | Septin 11                                                                                                                |
| 1223 | NM_013349 | SCIRP10  |        | 19 | 8 | 0.9920997670 | SCIRP10-related protein                                                                                                  |
| 1224 | NM_018190 | BBS7     |        | 19 | 8 | 0.9920737358 | Bardet-Biedl syndrome 7                                                                                                  |
| 1225 | NM_014235 | UBL4     |        | 19 | 7 | 0.9920579189 | Ubiquitin-like 4                                                                                                         |
| 1226 | NM_006445 | PRPF8    |        | 19 | 8 | 0.9920123024 | PRP8 pre-mRNA processing factor 8 homolog (yeast)                                                                        |
| 1227 | U31285    |          |        | 17 | 7 | 0.9919466409 | Data not found                                                                                                           |
| 1228 | AK001838  | 182-FIP  |        | 19 | 8 | 0.9919019717 | 82-kD FMRP Interacting Protein                                                                                           |
| 1229 | NM_018386 | FLJ11305 |        | 19 | 8 | 0.9918451203 | Hypothetical protein FLJ11305                                                                                            |
| 1230 | NM_003244 | TGIF     |        | 19 | 8 | 0.9918401942 | TGFB-induced factor (TALE family homeobox)                                                                               |
| 1231 | AK024536  | CADPS    |        | 18 | 8 | 0.9918364856 | Ca <sup>2+</sup> -dependent secretion activator                                                                          |
| 1232 | NM_014617 | CRYGA    |        | 18 | 8 | 0.9918002421 | Crystallin, gamma A                                                                                                      |
| 1233 | AJ276207  | SLC6A20  |        | 19 | 8 | 0.9917840063 | Solute carrier family 6 (proline IMINO transporter), member 20                                                           |
| 1234 | AB040878  | SEMA5B   |        | 11 | 8 | 0.9917839851 | Sema domain, seven thrombospondin repeats (type 1 and type 1-like), transmembrane domain (TM) and short cytoplasmic tail |
| 1235 | NM_007071 | HHLA3    |        | 19 | 8 | 0.9917694950 | HERV-H LTR-associating 3                                                                                                 |
| 1236 | NM_005257 | GATA6    |        | 19 | 8 | 0.9917484562 | GATA binding protein 6                                                                                                   |
| 1237 | NM_016215 | EGFL7    |        | 19 | 8 | 0.9916882447 | EGF-like-domain, multiple 7                                                                                              |
| 1238 | AK026201  | RAB3IP   |        | 19 | 8 | 0.9916857111 | RAB3A interacting protein (rabin3)                                                                                       |
| 1239 | NM_001343 | DAB2     |        | 19 | 8 | 0.9916538151 | Disabled homolog 2, mitogen-responsive phosphoprotein (Drosophila)                                                       |
| 1240 | NM_019037 | EXOSC4   |        | 19 | 8 | 0.9915925061 | Exosome component 4                                                                                                      |
| 1241 | AF097431  | LEPRE1   |        | 19 | 8 | 0.9915388874 | Leucine proline-enriched proteoglycan (leprecan) 1                                                                       |
| 1242 | NM_004966 | HNRPF    |        | 19 | 8 | 0.9915173590 | Heterogeneous nuclear ribonucleoprotein F                                                                                |
| 1243 | AK021989  | SCMH1    |        | 16 | 5 | 0.9915135372 | Sex comb on midleg homolog 1 (Drosophila)                                                                                |
| 1244 | AK022611  | PCNT1    |        | 19 | 8 | 0.9915071647 | Pericentrin 1                                                                                                            |
| 1245 | NM_005730 | CTDSP2   |        | 19 | 8 | 0.9915017073 | CTD (carboxy-terminal domain, RNA polymerase II, polypeptide A) small phosphatase 2                                      |
| 1246 | NM_005911 | MAT2A    |        | 19 | 8 | 0.9914818277 | Methionine adenosyltransferase II, alpha                                                                                 |
| 1247 | NM_012482 | ZNF281   |        | 19 | 8 | 0.9914402472 | Zinc finger protein 281                                                                                                  |
| 1248 | NM_018614 |          |        | 18 | 8 | 0.9913671407 | Data not found                                                                                                           |
| 1249 | NM_014612 | C9orf10  |        | 17 | 8 | 0.9913641148 | Chromosome 9 open reading frame 10                                                                                       |
| 1250 | NM_018097 | C15orf25 |        | 19 | 8 | 0.9913576863 | Chromosome 15 open reading frame 25                                                                                      |
| 1251 | AF086517  |          |        | 19 | 8 | 0.9913092421 | CDNA FLJ32401 fis, clone SKMUS2000339                                                                                    |
| 1252 | AL133090  | ADAM22   |        | 18 | 8 | 0.9913003032 | A disintegrin and metalloproteinase domain 22                                                                            |

|      |           |           |    |   |              |                                                                                                |
|------|-----------|-----------|----|---|--------------|------------------------------------------------------------------------------------------------|
| 1253 | NM_016376 | ANKFY1    | 19 | 8 | 0.9912831518 | Ankyrin repeat and FYVE domain containing 1                                                    |
| 1254 | NM_004729 | DHRXS     | 19 | 8 | 0.9912681951 | Dehydrogenase/reductase (SDR family) X-linked                                                  |
| 1255 | NM_005934 | MLLT1     | 18 | 8 | 0.9912605538 | Myeloid/lymphoid or mixed-lineage leukemia (trithorax homolog, Drosophila); translocated to, 1 |
| 1256 | NM_004529 | MLLT3     | 16 | 8 | 0.9912411826 | Myeloid/lymphoid or mixed-lineage leukemia (trithorax homolog, Drosophila); translocated to, 3 |
| 1257 | NM_000014 | A2M       | 19 | 8 | 0.9912175777 | Alpha-2-macroglobulin                                                                          |
| 1258 | NM_014685 | HERPUD1   | 19 | 8 | 0.9912120331 | Homocysteine-inducible, endoplasmic reticulum stress-inducible, ubiquitin-like domain member 1 |
| 1259 | NM_014387 | LAT       | 19 | 8 | 0.9911782650 | Linker for activation of T cells                                                               |
| 1260 | NM_018174 | BPY2IP1   | 19 | 8 | 0.9911288719 | BPY2 interacting protein 1                                                                     |
| 1261 | NM_005104 | BRD2      | 19 | 8 | 0.9911217397 | Bromodomain containing 2                                                                       |
| 1262 | AF078866  | SURF4     | 19 | 8 | 0.9911187246 | Surfeit 4                                                                                      |
| 1263 | NM_001777 | CD47      | 19 | 8 | 0.9910653719 | CD47 antigen (Rh-related antigen, integrin-associated signal transducer)                       |
| 1264 | M35675    | APP       | 19 | 8 | 0.9910227174 | Amyloid beta (A4) precursor protein (protease nexin-II, Alzheimer disease)                     |
| 1265 | NM_016359 | NUSAP1    | 19 | 8 | 0.9910188948 | Nucleolar and spindle associated protein 1                                                     |
| 1266 | NM_003516 | HIST2H2AA | 19 | 8 | 0.9910138026 | Histone 2, H2aa                                                                                |
| 1267 | AK000864  |           | 18 | 8 | 0.9910005675 | CDNA FLJ10002 fis, clone HEMBA1000046                                                          |
| 1268 | NM_006268 | DPF2      | 19 | 8 | 0.9909941460 | D4, zinc and double PHD fingers family 2                                                       |
| 1269 | NM_018562 |           | 13 | 8 | 0.9909929960 | Data not found                                                                                 |
| 1270 | AK027091  |           | 17 | 7 | 0.9909893784 | Hypothetical LOC388388                                                                         |
| 1271 | NM_014302 | SEC61G    | 19 | 8 | 0.9909667122 | Sec61 gamma subunit                                                                            |
| 1272 | NM_012332 | ACATE2    | 19 | 7 | 0.9909043571 | Acyl-Coenzyme A thioesterase 2, mitochondrial                                                  |
| 1273 | NM_004833 | AIM2      | 14 | 8 | 0.9908691686 | Absent in melanoma 2                                                                           |
| 1274 | NM_006190 | ORC2L     | 19 | 8 | 0.9908395565 | Origin recognition complex, subunit 2-like (yeast)                                             |
| 1275 | NM_013274 | POLL      | 18 | 8 | 0.9908306337 | Polymerase (DNA directed), lambda                                                              |
| 1276 | S83282    |           | 18 | 8 | 0.9908020759 | Data not found                                                                                 |
| 1277 | NM_005293 | GPR20     | 13 | 6 | 0.9907854406 | G protein-coupled receptor 20                                                                  |
| 1278 | NM_000304 | PMP22     | 19 | 8 | 0.9906778705 | Peripheral myelin protein 22                                                                   |
| 1279 | AK026945  | TRIB3     | 19 | 8 | 0.9906669902 | Tribbles homolog 3 (Drosophila)                                                                |
| 1280 | AF311287  | CARD9     | 18 | 8 | 0.9906629643 | Chromosome 9 open reading frame 151                                                            |
| 1281 | NM_003131 | SRF       | 19 | 8 | 0.9906420500 | Serum response factor (c-fos serum response element-binding transcription factor)              |
| 1282 | D82345    | TMSNB     | 18 | 8 | 0.9906382137 | Thymosin-like 8                                                                                |
| 1283 | AK024030  | FLJ13855  | 19 | 8 | 0.9906331988 | Hypothetical protein FLJ13855                                                                  |
| 1284 | AK026151  | PRKCBP1   | 19 | 8 | 0.9905734636 | Protein kinase C binding protein 1                                                             |
| 1285 | NM_005322 | HIST1H1B  | 19 | 7 | 0.9905663001 | Histone 1, H1b                                                                                 |

|      |           |          |    |   |              |                                                                                                   |
|------|-----------|----------|----|---|--------------|---------------------------------------------------------------------------------------------------|
| 1286 | NM_005902 | SMAD3    | 18 | 8 | 0.9905521291 | SMAD, mothers against DPP homolog 3 (Drosophila)                                                  |
| 1287 | AB018327  | ADNP     | 19 | 8 | 0.9905441349 | Activity-dependent neuroprotector                                                                 |
| 1288 | NM_016653 | ZAK      | 17 | 8 | 0.9905285423 | Hypothetical protein LOC339751                                                                    |
| 1289 | NM_006577 | B3GNT1   | 18 | 8 | 0.9905161869 | UDP-GlcNAc:betaGal beta-1,3-N-acetylglucosaminyltransferase 1                                     |
| 1290 | NM_002823 | PTMA     | 19 | 8 | 0.9904856538 | Prothymosin, alpha (gene sequence 28)                                                             |
| 1291 | NM_006022 | TGFB114  | 19 | 8 | 0.9904671873 | TSC22 domain family, member 1                                                                     |
| 1292 | AJ270695  | BHLHB3   | 17 | 7 | 0.9904490102 | Basic helix-loop-helix domain containing, class B, 3                                              |
| 1293 | AB037744  | MIB1     | 19 | 8 | 0.9904268003 | Mindbomb homolog 1 (Drosophila)                                                                   |
| 1294 | AF125392  | INSIG2   | 15 | 6 | 0.9904192140 | Insulin induced gene 2                                                                            |
| 1295 | NM_002767 | PRPSAP2  | 19 | 8 | 0.9904094346 | Phosphoribosyl pyrophosphate synthetase-associated protein 2                                      |
| 1296 | D31885    | ARL6IP   | 18 | 8 | 0.9904004671 | ADP-ribosylation factor-like 6 interacting protein                                                |
| 1297 | NM_004935 | CDK5     | 15 | 7 | 0.9903015230 | Cyclin-dependent kinase 5                                                                         |
| 1298 | NM_004265 | FADS2    | 18 | 8 | 0.9902025165 | Fatty acid desaturase 2                                                                           |
| 1299 | NM_002904 | RDBP     | 19 | 8 | 0.9901957013 | RD RNA binding protein                                                                            |
| 1300 | AK025346  | TMOD2    | 15 | 8 | 0.9901736658 | Tropomodulin 2 (neuronal)                                                                         |
| 1301 | NM_004343 | CALR     | 19 | 8 | 0.9901580932 | Calreticulin                                                                                      |
| 1302 | NM_003071 | SMARCA3  | 18 | 7 | 0.9901558106 | SWI/SNF related, matrix associated, actin dependent regulator of chromatin, subfamily a, member 3 |
| 1303 | NM_004444 | EPHB4    | 19 | 8 | 0.9901365756 | EPH receptor B4                                                                                   |
| 1304 | NM_018109 | PAPD1    | 19 | 8 | 0.9901261970 | PAP associated domain containing 1                                                                |
| 1305 | NM_019013 | FLJ10156 | 17 | 7 | 0.9901147783 | Family with sequence similarity 64, member A                                                      |
| 1306 | AB033096  | AARSL    | 19 | 8 | 0.9900156227 | Alanyl-tRNA synthetase like                                                                       |
| 1307 | NM_002301 | LDHC     | 19 | 8 | 0.9899312000 | Lactate dehydrogenase C                                                                           |
| 1308 | NM_006087 | TUBB4    | 19 | 8 | 0.9899183350 | Tubulin, beta 4                                                                                   |
| 1309 | AK022407  |          | 14 | 5 | 0.9898997580 | CDNA FLJ12345 fis, clone MAMMA1002294                                                             |
| 1310 | NM_012248 | SEPHS2   | 19 | 8 | 0.9898895700 | Selenophosphate synthetase 2                                                                      |
| 1311 | NM_006807 | CBX1     | 18 | 8 | 0.9897703980 | Chromobox homolog 1 (HP1 beta homolog Drosophila )                                                |
| 1312 | AL117452  | MTHFD1L  | 19 | 8 | 0.9897639950 | Methylenetetrahydrofolate dehydrogenase (NADP+ dependent) 1-like                                  |
| 1313 | AK026490  | RAB32    | 19 | 8 | 0.9897326750 | RAB32, member RAS oncogene family                                                                 |
| 1314 | NM_001440 | EXTL3    | 18 | 8 | 0.9897073880 | Exostoses (multiple)-like 3                                                                       |
| 1315 | NM_014148 |          | 13 | 5 | 0.9896818010 | Data not found                                                                                    |
| 1316 | AK025996  | MARVELD1 | 16 | 7 | 0.9896466610 | MARVEL domain containing 1                                                                        |
| 1317 | NM_001358 | DHX15    | 19 | 8 | 0.9896305030 | DEAH (Asp-Glu-Ala-His) box polypeptide 15                                                         |
| 1318 | AK000155  | HNRPLL   | 19 | 7 | 0.9896182620 | Heterogeneous nuclear ribonucleoprotein L-like                                                    |



|      |           |           |    |   |              |                                                                                           |
|------|-----------|-----------|----|---|--------------|-------------------------------------------------------------------------------------------|
| 1319 | NM_014358 | CLECSF9   | 19 | 8 | 0.9895933120 | C-type lectin domain family 4, member E                                                   |
| 1320 | NM_006257 | PRKCQ     | 18 | 8 | 0.9895608550 | Protein kinase C, theta                                                                   |
| 1321 | NM_012479 | YWHAG     | 19 | 8 | 0.9895520370 | Tyrosine 3-monooxygenase/tryptophan 5-monooxygenase activation protein, gamma polypeptide |
| 1322 | NM_006834 | RAB32     | 18 | 8 | 0.9895007570 | RAB32, member RAS oncogene family                                                         |
| 1323 | AK026747  | LOC54103  | 19 | 8 | 0.9894222150 | Hypothetical protein LOC54103                                                             |
| 1324 | NM_005222 |           | 16 | 5 | 0.9894095110 | Data not found                                                                            |
| 1325 | L40520    |           | 19 | 8 | 0.9894015960 | CDNA FLJ42136 fis, clone TESTI2035997                                                     |
| 1326 | NM_005414 | SKIL      | 12 | 8 | 0.9893700780 | SKI-like                                                                                  |
| 1327 | NM_004341 | CAD       | 18 | 8 | 0.9893557920 | Carbamoyl-phosphate synthetase 2, aspartate transcarbamylase, and dihydroorotase          |
| 1328 | AB018337  | KIAA0794  | 19 | 8 | 0.9893341610 | KIAA0794 protein                                                                          |
| 1329 | AB046819  | CPNE5     | 19 | 8 | 0.9893118920 | Copine V                                                                                  |
| 1330 | AF303398  | LMAN1L    | 19 | 8 | 0.9892824990 | Lectin, mannose-binding, 1 like                                                           |
| 1331 | AK001230  | POT1      | 17 | 8 | 0.9892598410 | POT1 protection of telomeres 1 homolog (S. pombe)                                         |
| 1332 | AK026938  |           | 12 | 7 | 0.9892501500 | Hypothetical gene supported by AL713796                                                   |
| 1333 | NM_006809 | TOMM34    | 19 | 8 | 0.9892457630 | Translocase of outer mitochondrial membrane 34                                            |
| 1334 | NM_003680 | YARS      | 18 | 8 | 0.9892392320 | Tyrosyl-tRNA synthetase                                                                   |
| 1335 | NM_018259 | TTC17     | 19 | 8 | 0.9892212670 | Tetratricopeptide repeat domain 17                                                        |
| 1336 | AF108756  |           | 19 | 8 | 0.9892198070 | Fibroblast growth factor 13 isoform 1y1v (FGF13)                                          |
| 1337 | NM_006756 | TCEA1     | 19 | 8 | 0.9891983430 | Transcription elongation factor A (SII), 1                                                |
| 1338 | L32841    |           | 19 | 8 | 0.9891934470 | Data not found                                                                            |
| 1339 | NM_005881 | BCKDK     | 19 | 8 | 0.9891497790 | Branched chain ketoacid dehydrogenase kinase                                              |
| 1340 | NM_003343 | UBE2G2    | 19 | 8 | 0.9891282670 | Ubiquitin-conjugating enzyme E2G 2 (UBC7 homolog, yeast)                                  |
| 1341 | AF044578  | POLN      | 19 | 8 | 0.9891209070 | Polymerase (DNA directed) nu                                                              |
| 1342 | NM_017590 | RoXaN     | 19 | 8 | 0.9891153220 | Zinc finger CCCH-type containing 7B                                                       |
| 1343 | NM_002185 | IL7R      | 18 | 8 | 0.9891061920 | Interleukin 7 receptor                                                                    |
| 1344 | NM_017453 | STAU      | 18 | 8 | 0.9890927610 | Staufen, RNA binding protein (Drosophila)                                                 |
| 1345 | NM_006295 | VARS2     | 18 | 8 | 0.9890363690 | Valyl-tRNA synthetase                                                                     |
| 1346 | NM_003288 | TPD52L2   | 19 | 8 | 0.9889830730 | Tumor protein D52-like 2                                                                  |
| 1347 | NM_003093 | SNRPC     | 19 | 8 | 0.9889259990 | Small nuclear ribonucleoprotein polypeptide C                                             |
| 1348 | AF086059  | LOC283480 | 15 | 6 | 0.9889161060 | Hypothetical protein LOC283481                                                            |
| 1349 | X96646    |           | 18 | 8 | 0.9889082660 | Data not found                                                                            |
| 1350 | NM_020121 | UGCGL2    | 18 | 7 | 0.9888704030 | UDP-glucose ceramide glucosyltransferase-like 2                                           |
| 1351 | AK025150  |           | 17 | 8 | 0.9888479160 | Data not found                                                                            |

|      |           |           |    |   |              |                                                            |
|------|-----------|-----------|----|---|--------------|------------------------------------------------------------|
| 1352 | AF289485  | C12orf10  | 19 | 8 | 0.9888447220 | Chromosome 12 open reading frame 10                        |
| 1353 | NM_013275 | ANKRD11   | 18 | 8 | 0.9888340380 | Ankyrin repeat domain 11                                   |
| 1354 | NM_004074 | COX8A     | 19 | 8 | 0.9888210390 | Cytochrome c oxidase subunit 8A (ubiquitous)               |
| 1355 | AL080066  | C14orf147 | 18 | 7 | 0.9888015090 | Chromosome 14 open reading frame 147                       |
| 1356 | NM_017911 | C22orf8   | 18 | 8 | 0.9887547560 | Chromosome 22 open reading frame 8                         |
| 1357 | NM_001522 | GUCY2F    | 19 | 8 | 0.9887179240 | Guanylate cyclase 2F, retinal                              |
| 1358 | NM_005269 | GLI1      | 18 | 8 | 0.9886747340 | Glioma-associated oncogene homolog 1 (zinc finger protein) |
| 1359 | NM_014288 | ITGB3BP   | 19 | 8 | 0.9886739340 | Integrin beta 3 binding protein (beta3-endonexin)          |
| 1360 | AF176085  | PTBP2     | 19 | 8 | 0.9886422190 | Polypyrimidine tract binding protein 2                     |
| 1361 | NM_016606 | C5orf19   | 19 | 8 | 0.9886287570 | Chromosome 5 open reading frame 19                         |
| 1362 | NM_016507 | CRK7      | 19 | 8 | 0.9885416710 | CDC2-related protein kinase 7                              |
| 1363 | NM_006288 | THY1      | 18 | 8 | 0.9884844810 | Thy-1 cell surface antigen                                 |
| 1364 | AF090945  | CD58      | 12 | 6 | 0.9883626900 | CD58 antigen, (lymphocyte function-associated antigen 3)   |
| 1365 | NM_006851 | GLIPR1    | 19 | 8 | 0.9883478310 | GLI pathogenesis-related 1 (glioma)                        |
| 1366 | AF091081  | PHF8      | 19 | 8 | 0.9883355890 | PHD finger protein 8                                       |
| 1367 | AF086274  |           | 18 | 8 | 0.9882889470 | Full length insert cDNA clone ZD45B04                      |
| 1368 | NM_003345 | UBE2I     | 19 | 7 | 0.9882869550 | Ubiquitin-conjugating enzyme E2I (UBC9 homolog, yeast)     |
| 1369 | AK024465  | GNG7      | 14 | 6 | 0.9882727730 | Guanine nucleotide binding protein (G protein), gamma 7    |
| 1370 | AB011094  | IQSEC2    | 17 | 8 | 0.9882694390 | IQ motif and Sec7 domain 2                                 |
| 1371 | NM_002737 | PRKCA     | 18 | 7 | 0.9882372590 | Protein kinase C, alpha                                    |
| 1372 | AK023316  | FLJ20618  | 14 | 6 | 0.9882056890 | Taurine upregulated gene 1                                 |
| 1373 | NM_005065 | SEL1L     | 19 | 7 | 0.9881962740 | Sel-1 suppressor of lin-12-like (C. elegans)               |
| 1374 | AJ001432  | RUNX3     | 16 | 6 | 0.9881568260 | Runt-related transcription factor 3                        |
| 1375 | AK000910  |           | 14 | 8 | 0.9880555440 | CDNA FLJ10048 fis, clone HEMBA1001140                      |
| 1376 | NM_017722 | FLJ20244  | 19 | 8 | 0.9880171340 | Hypothetical protein FLJ20244                              |
| 1377 | NM_003674 | CDK10     | 19 | 7 | 0.9879930320 | Cyclin-dependent kinase (CDC2-like) 10                     |
| 1378 | AK023971  | FLJ13909  | 19 | 8 | 0.9879861990 | Hypothetical protein FLJ13909                              |
| 1379 | M14584    | IL6       | 18 | 8 | 0.9879262990 | Interleukin 6 (interferon, beta 2)                         |
| 1380 | NM_005860 | FSTL3     | 19 | 8 | 0.9879215220 | Follistatin-like 3 (secreted glycoprotein)                 |
| 1381 | NM_003061 | SLIT1     | 16 | 6 | 0.9878862340 | Slit homolog 1 (Drosophila)                                |
| 1382 | NM_006165 | NFRKB     | 18 | 8 | 0.9878852500 | Nuclear factor related to kappaB binding protein           |
| 1383 | D50914    | BOP1      | 19 | 8 | 0.9877634670 | Hypothetical protein KIAA1833                              |
| 1384 | AK001069  | UPF3A     | 19 | 8 | 0.9876896790 | UPF3 regulator of nonsense transcripts homolog A (yeast)   |

|      |           |           |    |   |              |                                                                                                                          |
|------|-----------|-----------|----|---|--------------|--------------------------------------------------------------------------------------------------------------------------|
| 1385 | NM_016245 | DHRS8     | 18 | 8 | 0.9876489610 | Dehydrogenase/reductase (SDR family) member 8                                                                            |
| 1386 | NM_003796 | C19orf2   | 16 | 8 | 0.9876225600 | Chromosome 19 open reading frame 2                                                                                       |
| 1387 | AF113132  | PSAT1     | 18 | 8 | 0.9875869870 | Phosphoserine aminotransferase 1                                                                                         |
| 1388 | NM_018106 | ZDHHC4    | 19 | 7 | 0.9875034330 | Zinc finger, DHHC-type containing 4                                                                                      |
| 1389 | Y09836    |           | 18 | 8 | 0.9873827580 | CDNA FLJ30550 fis, clone BRAWH2001502                                                                                    |
| 1390 | U25752    |           | 19 | 8 | 0.9873819930 | Data not found                                                                                                           |
| 1391 | NM_000034 | ALDOA     | 19 | 8 | 0.9873597340 | Aldolase A, fructose-bisphosphate                                                                                        |
| 1392 | NM_018152 | C20orf12  | 18 | 7 | 0.9872917140 | Chromosome 20 open reading frame 12                                                                                      |
| 1393 | NM_002394 |           | 19 | 8 | 0.9872612950 | Data not found                                                                                                           |
| 1394 | AF009262  | SEMA5A    | 19 | 8 | 0.9872339490 | Sema domain, seven thrombospondin repeats (type 1 and type 1-like), transmembrane domain (TM) and short cytoplasmic tail |
| 1395 | NM_001110 | ADAM10    | 19 | 8 | 0.9872077800 | A disintegrin and metalloproteinase domain 10                                                                            |
| 1396 | NM_015853 | LOC51035  | 18 | 8 | 0.9871943160 | ORF                                                                                                                      |
| 1397 | AL389983  |           | 19 | 7 | 0.9871940170 | Hypothetical LOC389362                                                                                                   |
| 1398 | NM_002165 | ID1       | 19 | 8 | 0.9871854840 | Inhibitor of DNA binding 1, dominant negative helix-loop-helix protein                                                   |
| 1399 | AF222927  | SAMSN1    | 18 | 8 | 0.9871355790 | SAM domain, SH3 domain and nuclear localisation signals, 1                                                               |
| 1400 | NM_001946 | DUSP6     | 19 | 8 | 0.9871152410 | Dual specificity phosphatase 6                                                                                           |
| 1401 | NM_006228 | PNOC      | 17 | 5 | 0.9870999270 | Prepronociceptin                                                                                                         |
| 1402 | Y17180    |           | 19 | 8 | 0.9870905000 | Data not found                                                                                                           |
| 1403 | NM_018207 | TRIM62    | 17 | 6 | 0.9870764300 | Tripartite motif-containing 62                                                                                           |
| 1404 | AK026884  | FLJ23231  | 19 | 8 | 0.9870512380 | Zinc finger CCCH-type containing 12A                                                                                     |
| 1405 | NM_001990 | EYA3      | 19 | 8 | 0.9870168430 | Eyes absent homolog 3 (Drosophila)                                                                                       |
| 1406 | NM_004931 | CD8B1     | 18 | 8 | 0.9870028090 | CD8 antigen, beta polypeptide 1 (p37)                                                                                    |
| 1407 | NM_016476 | ANAPC11   | 19 | 8 | 0.9869960130 | APC11 anaphase promoting complex subunit 11 homolog (yeast)                                                              |
| 1408 | NM_005338 | HIP1      | 18 | 6 | 0.9869385570 | Huntingtin interacting protein 1                                                                                         |
| 1409 | X78712    | GK2       | 19 | 8 | 0.9869361290 | Glycerol kinase 2                                                                                                        |
| 1410 | U17327    | NOS1      | 19 | 8 | 0.9869111570 | Nitric oxide synthase 1 (neuronal)                                                                                       |
| 1411 | AJ227864  | PLS3      | 19 | 6 | 0.9868977650 | Plastin 3 (T isoform)                                                                                                    |
| 1412 | NM_014439 | IL1F7     | 16 | 7 | 0.9868944000 | Interleukin 1 family, member 7 (zeta)                                                                                    |
| 1413 | AF086130  | LOC441168 | 18 | 6 | 0.9868545580 | Hypothetical protein LOC441168                                                                                           |
| 1414 | NM_003900 | SQSTM1    | 18 | 8 | 0.9868516460 | Sequestosome 1                                                                                                           |
| 1415 | NM_004086 | COCH      | 17 | 6 | 0.9868377500 | Coagulation factor C homolog, cochlin (Limulus polyphemus)                                                               |
| 1416 | NM_020228 | PRDM10    | 19 | 8 | 0.9868162520 | PR domain containing 10                                                                                                  |
| 1417 | NM_018455 | BM039     | 19 | 8 | 0.9867425800 | Uncharacterized bone marrow protein BM039                                                                                |

|      |           |           |    |   |              |                                                                                                    |
|------|-----------|-----------|----|---|--------------|----------------------------------------------------------------------------------------------------|
| 1418 | NM_006606 | RBBP9     | 14 | 7 | 0.9866551920 | Retinoblastoma binding protein 9                                                                   |
| 1419 | NM_001240 | CCNT1     | 19 | 8 | 0.9866510170 | Cyclin T1                                                                                          |
| 1420 | X52221    |           | 17 | 7 | 0.9866405210 | Data not found                                                                                     |
| 1421 | NM_002844 | PTPRK     | 17 | 8 | 0.9865864740 | Protein tyrosine phosphatase, receptor type, K                                                     |
| 1422 | NM_006860 | RABL4     | 18 | 8 | 0.9865812410 | RAB, member of RAS oncogene family-like 4                                                          |
| 1423 | NM_000308 | PPGB      | 18 | 8 | 0.9865633560 | Protective protein for beta-galactosidase (galactosialidosis)                                      |
| 1424 | NM_019063 | EML4      | 19 | 8 | 0.9865011970 | Echinoderm microtubule associated protein like 4                                                   |
| 1425 | NM_016631 | C21orf66  | 19 | 7 | 0.9864510020 | Chromosome 21 open reading frame 66                                                                |
| 1426 | NM_015943 |           | 19 | 8 | 0.9864344330 | Data not found                                                                                     |
| 1427 | AK026518  | MYOHD1    | 19 | 8 | 0.9864136320 | Myosin head domain containing 1                                                                    |
| 1428 | NM_013253 | DKK3      | 17 | 8 | 0.9863903020 | Dickkopf homolog 3 ( <i>Xenopus laevis</i> )                                                       |
| 1429 | AJ011409  | C21orf104 | 19 | 8 | 0.9863586670 | Chromosome 21 open reading frame 104                                                               |
| 1430 | NM_014005 | PCDHA6    | 10 | 6 | 0.9863540190 | Protocadherin alpha subfamily C, 1                                                                 |
| 1431 | NM_019847 |           | 18 | 8 | 0.9863489170 | Data not found                                                                                     |
| 1432 | NM_016256 | NAGPA     | 17 | 8 | 0.9862962190 | N-acetylglucosamine-1-phosphodiester alpha-N-acetylglucosaminidase                                 |
| 1433 | U58514    | CHI3L2    | 15 | 5 | 0.9862546110 | Chitinase 3-like 2                                                                                 |
| 1434 | AK026266  | FER1L4    | 19 | 8 | 0.9862218430 | Fer-1-like 4 ( <i>C. elegans</i> )                                                                 |
| 1435 | NM_000794 | DRD1      | 14 | 7 | 0.9862082280 | Dopamine receptor D1                                                                               |
| 1436 | AK022743  | FLJ12681  | 15 | 7 | 0.9861953010 | Hypothetical protein FLJ12681                                                                      |
| 1437 | NM_005003 | NDUFAB1   | 18 | 8 | 0.9861575930 | NADH dehydrogenase (ubiquinone) 1, alpha/beta subcomplex, 1, 8kDa                                  |
| 1438 | NM_004358 | CDC25B    | 19 | 8 | 0.9861515070 | Cell division cycle 25B                                                                            |
| 1439 | AK001102  | KAL1      | 19 | 6 | 0.9860986120 | Kallmann syndrome 1 sequence                                                                       |
| 1440 | U90907    | PIK3R3    | 15 | 7 | 0.9860980330 | Phosphoinositide-3-kinase, regulatory subunit 3 (p55, gamma)                                       |
| 1441 | NM_003632 | CNTNAP1   | 18 | 6 | 0.9860526010 | Contactin associated protein 1                                                                     |
| 1442 | NM_007056 | SFRS16    | 19 | 8 | 0.9860080810 | Splicing factor, arginine/serine-rich 16 (suppressor-of-white-apricot homolog, <i>Drosophila</i> ) |
| 1443 | AK001126  | LOC286075 | 15 | 7 | 0.9859895120 | Hypothetical protein LOC286075                                                                     |
| 1444 | NM_017840 | MRPL16    | 19 | 8 | 0.9859592950 | Mitochondrial ribosomal protein L16                                                                |
| 1445 | NM_002310 | LIFR      | 16 | 8 | 0.9859479760 | Leukemia inhibitory factor receptor                                                                |
| 1446 | AF027302  | ABCF1     | 18 | 8 | 0.9859202860 | ATP-binding cassette, sub-family F (GCN20), member 1                                               |
| 1447 | NM_001935 | DPP4      | 19 | 8 | 0.9859142370 | Dipeptidylpeptidase 4 (CD26, adenosine deaminase complexing protein 2)                             |
| 1448 | NM_018682 | MLL5      | 19 | 8 | 0.9859016890 | Myeloid/lymphoid or mixed-lineage leukemia 5 (trithorax homolog, <i>Drosophila</i> )               |
| 1449 | AF075081  |           | 19 | 5 | 0.9858286910 | Full length insert cDNA YQ80H05                                                                    |
| 1450 | NM_004836 | EIF2AK3   | 19 | 8 | 0.9857632190 | Eukaryotic translation initiation factor 2-alpha kinase 3                                          |

|      |           |          |    |   |              |                                                                                                |
|------|-----------|----------|----|---|--------------|------------------------------------------------------------------------------------------------|
| 1451 | NM_002089 | CXCL2    | 17 | 7 | 0.9857384000 | Chemokine (C-X-C motif) ligand 2                                                               |
| 1452 | NM_005622 | SAH      | 16 | 7 | 0.9857379050 | SA hypertension-associated homolog (rat)                                                       |
| 1453 | NM_002009 | FGF7     | 17 | 8 | 0.9857082260 | Fibroblast growth factor 7 (keratinocyte growth factor)                                        |
| 1454 | NM_004747 | DLG5     | 17 | 7 | 0.9856870030 | Discs, large homolog 5 (Drosophila)                                                            |
| 1455 | AF111849  | ELOVL5   | 18 | 8 | 0.9856711740 | ELOVL family member 5, elongation of long chain fatty acids (FEN1/Elo2, SUR4/Elo3-like, yeast) |
| 1456 | NM_013439 | PILRA    | 19 | 8 | 0.9856501850 | Paired immunoglobulin-like type 2 receptor alpha                                               |
| 1457 | AK022738  |          | 16 | 5 | 0.9856316380 | CDNA FLJ12676 fis, clone NT2RM4002383                                                          |
| 1458 | AF192979  | ZNF229   | 11 | 5 | 0.9856300540 | Zinc finger protein 229                                                                        |
| 1459 | NM_002800 | PSMB9    | 19 | 8 | 0.9855957170 | Proteasome (prosome, macropain) subunit, beta type, 9 (large multifunctional protease 2)       |
| 1460 | AL157459  | MGC10561 | 13 | 7 | 0.9855948840 | Chromobox homolog 2 (Pc class homolog, Drosophila)                                             |
| 1461 | AK026402  |          | 19 | 8 | 0.9855321700 | CDNA: FLJ22749 fis, clone KAIA0458                                                             |
| 1462 | NM_006559 | KHDRBS1  | 17 | 8 | 0.9854611060 | KH domain containing, RNA binding, signal transduction associated 1                            |
| 1463 | NM_000544 | TAP2     | 17 | 8 | 0.9854030640 | Transporter 2, ATP-binding cassette, sub-family B (MDR/TAP)                                    |
| 1464 | AK021965  | MGC40405 | 15 | 6 | 0.9853741760 | Zinc finger, SWIM-type containing 6                                                            |
| 1465 | NM_005356 | LCK      | 19 | 8 | 0.9853616780 | Lymphocyte-specific protein tyrosine kinase                                                    |
| 1466 | NM_002219 |          | 19 | 7 | 0.9853285300 | Data not found                                                                                 |
| 1467 | D86974    | KIAA0220 | 15 | 8 | 0.9852998680 | Hypothetical protein LOC440345                                                                 |
| 1468 | AL390153  | MBD3     | 16 | 7 | 0.9852504650 | Methyl-CpG binding domain protein 3                                                            |
| 1469 | NM_014813 | LRIG2    | 13 | 6 | 0.9852099740 | Leucine-rich repeats and immunoglobulin-like domains 2                                         |
| 1470 | NM_006608 | PHTF1    | 18 | 8 | 0.9851768980 | Putative homeodomain transcription factor 1                                                    |
| 1471 | AK021744  |          | 13 | 5 | 0.9851717760 | CDNA FLJ11682 fis, clone HEMBA1004880                                                          |
| 1472 | NM_018616 |          | 16 | 8 | 0.9851683460 | Data not found                                                                                 |
| 1473 | NM_002131 | HMGA1    | 19 | 8 | 0.9851594990 | High mobility group AT-hook 1                                                                  |
| 1474 | NM_004788 | UBE4A    | 19 | 8 | 0.9851374670 | Ubiquitination factor E4A (UFD2 homolog, yeast)                                                |
| 1475 | NM_014820 | TOMM70A  | 18 | 8 | 0.9851311800 | Translocase of outer mitochondrial membrane 70 homolog A (yeast)                               |
| 1476 | NM_014844 | KIAA0329 | 17 | 5 | 0.9851108740 | KIAA0329                                                                                       |
| 1477 | NM_014629 | ARHGEF10 | 18 | 8 | 0.9851043880 | Rho guanine nucleotide exchange factor (GEF) 10                                                |
| 1478 | NM_001360 | DHCR7    | 19 | 8 | 0.9851016850 | 7-dehydrocholesterol reductase                                                                 |
| 1479 | NM_006761 | YWHAE    | 19 | 8 | 0.9850834450 | Tyrosine 3-monooxygenase/tryptophan 5-monooxygenase activation protein, epsilon polypeptide    |
| 1480 | AK024111  | HCG11    | 19 | 8 | 0.9850506280 | HLA complex group 11                                                                           |
| 1481 | AF162715  | POU2F3   | 14 | 6 | 0.9850307010 | POU domain, class 2, transcription factor 3                                                    |
| 1482 | AB033103  | KIAA1277 | 17 | 8 | 0.9849357710 | KIAA1277                                                                                       |
| 1483 | NM_000199 | SGSH     | 19 | 8 | 0.9849092440 | N-sulfoglucosamine sulfohydrolase (sulfamidase)                                                |

|      |           |          |    |   |              |                                                                                                    |
|------|-----------|----------|----|---|--------------|----------------------------------------------------------------------------------------------------|
| 1484 | AF233453  | PRKCBP1  | 19 | 8 | 0.9848980990 | Protein kinase C binding protein 1                                                                 |
| 1485 | NM_006585 | CCT8     | 18 | 8 | 0.9848504030 | Chaperonin containing TCPI, subunit 8 (theta)                                                      |
| 1486 | NM_001938 | DR1      | 19 | 8 | 0.9846570610 | Down-regulator of transcription 1, TBP-binding (negative cofactor 2)                               |
| 1487 | NM_004597 | SNRPD2   | 18 | 8 | 0.9846500180 | Small nuclear ribonucleoprotein D2 polypeptide 16.5kDa                                             |
| 1488 | AF085900  | HHAT     | 12 | 6 | 0.9846181350 | Hedgehog acyltransferase                                                                           |
| 1489 | J02639    | SERPINA5 | 19 | 8 | 0.9845562020 | Serine (or cysteine) proteinase inhibitor, clade A (alpha-1 antiproteinase, antitrypsin), member 5 |
| 1490 | AF172327  |          | 18 | 8 | 0.9845541750 | Data not found                                                                                     |
| 1491 | NM_000118 | ENG      | 19 | 8 | 0.9845449140 | Endoglin (Osler-Rendu-Weber syndrome 1)                                                            |
| 1492 | AL137404  | LOC90313 | 19 | 8 | 0.9845404730 | Hypothetical protein BC004507                                                                      |
| 1493 | NM_019057 | FLJ10404 | 14 | 8 | 0.9845038500 | Hypothetical protein FLJ10404                                                                      |
| 1494 | NM_007188 | ABCB8    | 19 | 8 | 0.9844892340 | ATP-binding cassette, sub-family B (MDR/TAP), member 8                                             |
| 1495 | NM_002600 | PDE4B    | 12 | 6 | 0.9844531810 | Phosphodiesterase 4B, cAMP-specific (phosphodiesterase E4 dunce homolog, Drosophila)               |
| 1496 | NM_006451 | PAIP1    | 19 | 8 | 0.9844375780 | Poly(A) binding protein interacting protein 1                                                      |
| 1497 | AK025714  | FLJ23322 | 19 | 7 | 0.9843970230 | Hypothetical protein FLJ23322                                                                      |
| 1498 | AB046802  | TNRC6C   | 18 | 8 | 0.9843812050 | Trinucleotide repeat containing 6C                                                                 |
| 1499 | AB018317  | KIAA0774 | 14 | 5 | 0.9843670280 | KIAA0774                                                                                           |
| 1500 | NM_004586 | RPS6KA3  | 18 | 8 | 0.9843483060 | Ribosomal protein S6 kinase, 90kDa, polypeptide 3                                                  |
| 1501 | NM_003999 | OSMR     | 19 | 8 | 0.9842978390 | Oncostatin M receptor                                                                              |
| 1502 | NM_001708 | OPN1SW   | 19 | 8 | 0.9842922290 | Opsin 1 (cone pigments), short-wave-sensitive (color blindness, tritan)                            |
| 1503 | AL390161  | BRUNOL5  | 14 | 7 | 0.9842603370 | Bruno-like 5, RNA binding protein (Drosophila)                                                     |
| 1504 | NM_002967 | SAFB     | 19 | 8 | 0.9842577520 | Scaffold attachment factor B                                                                       |
| 1505 | NM_015556 | SIPA1L1  | 19 | 8 | 0.9842528480 | Signal-induced proliferation-associated 1 like 1                                                   |
| 1506 | NM_018246 | FLJ10853 | 19 | 8 | 0.9842327150 | Hypothetical protein FLJ10853                                                                      |
| 1507 | AL390178  |          | 16 | 7 | 0.9842191080 | Data not found                                                                                     |
| 1508 | NM_017909 | C6orf96  | 13 | 7 | 0.9842117040 | Chromosome 6 open reading frame 96                                                                 |
| 1509 | NM_014047 | HSPC023  | 19 | 8 | 0.9841299750 | HSPC023 protein                                                                                    |
| 1510 | NM_012286 | MORF4L2  | 19 | 8 | 0.9840972380 | Mortality factor 4 like 2                                                                          |
| 1511 | NM_004653 | SMCY     | 19 | 8 | 0.9840505400 | Smcy homolog, Y-linked (mouse)                                                                     |
| 1512 | NM_002354 | TACSTD1  | 15 | 8 | 0.9839935880 | Tumor-associated calcium signal transducer 1                                                       |
| 1513 | NM_014244 | ADAMTS2  | 17 | 8 | 0.9839786920 | A disintegrin-like and metalloprotease (reprolysin type) with thrombospondin type 1 motif, 2       |
| 1514 | Y13808    |          | 11 | 5 | 0.9839635550 | CDNA: FLJ20914 fis, clone ADSE00646                                                                |
| 1515 | NM_005606 | LGMN     | 19 | 8 | 0.9838855590 | Legumain                                                                                           |
| 1516 | NM_000911 | OPRD1    | 18 | 6 | 0.9837521690 | Opioid receptor, delta 1                                                                           |

|      |           |          |    |   |              |                                                                                                  |
|------|-----------|----------|----|---|--------------|--------------------------------------------------------------------------------------------------|
| 1517 | X05299    | CENPB    | 18 | 8 | 0.9836793460 | Centromere protein B, 80kDa                                                                      |
| 1518 | NM_015414 | RPL36    | 19 | 8 | 0.9836067490 | Ribosomal protein L36                                                                            |
| 1519 | U36561    | FUS      | 19 | 8 | 0.9835849080 | Fusion (involved in t(12;16) in malignant liposarcoma)                                           |
| 1520 | AJ300575  | ZBP1     | 19 | 7 | 0.9835771070 | Z-DNA binding protein 1                                                                          |
| 1521 | AB021925  | FGF22    | 14 | 6 | 0.9835141260 | Fibroblast growth factor 22                                                                      |
| 1522 | NM_003721 | RFXANK   | 19 | 8 | 0.9834646720 | Regulatory factor X-associated ankyrin-containing protein                                        |
| 1523 | NM_018295 | FLJ11000 | 18 | 8 | 0.9834520710 | Hypothetical protein FLJ11000                                                                    |
| 1524 | NM_014429 | MORC     | 18 | 7 | 0.9834470800 | MORC family CW-type zinc finger 1                                                                |
| 1525 | NM_006015 | ARID1A   | 19 | 8 | 0.9833241990 | AT rich interactive domain 1A (SWI- like)                                                        |
| 1526 | AK027139  | CSTF3    | 14 | 7 | 0.9832047240 | Hypothetical protein LOC283267                                                                   |
| 1527 | NM_003469 | SCG2     | 17 | 7 | 0.9830287460 | Secretogranin II (chromogranin C)                                                                |
| 1528 | NM_005634 | SOX3     | 19 | 8 | 0.9830090820 | SRY (sex determining region Y)-box 3                                                             |
| 1529 | NM_017540 | GALNT10  | 19 | 8 | 0.9830025040 | UDP-N-acetyl-alpha-D-galactosamine:polypeptide N-acetylgalactosaminyltransferase 10 (GalNAc-T10) |
| 1530 | NM_020384 | CLDN2    | 17 | 7 | 0.9829906540 | Claudin 2                                                                                        |
| 1531 | AF272378  | MLL      | 18 | 8 | 0.9829785400 | Myeloid/lymphoid or mixed-lineage leukemia (trithorax homolog, Drosophila)                       |
| 1532 | NM_005163 | AKT1     | 19 | 8 | 0.9829701020 | V-akt murine thymoma viral oncogene homolog 1                                                    |
| 1533 | NM_005238 | ETS1     | 18 | 8 | 0.9829486500 | V-ets erythroblastosis virus E26 oncogene homolog 1 (avian)                                      |
| 1534 | AF001893  | TncRNA   | 16 | 8 | 0.9829180290 | Trophoblast-derived noncoding RNA                                                                |
| 1535 | X64981    | OR10D1P  | 8  | 6 | 0.9827922280 | Olfactory receptor, family 10, subfamily D, member 1 pseudogene                                  |
| 1536 | AB029012  | EST1B    | 17 | 8 | 0.9827699250 | Est1p-like protein B                                                                             |
| 1537 | NM_006541 | TXNL2    | 19 | 8 | 0.9827317440 | Thioredoxin-like 2                                                                               |
| 1538 | AB020719  | Cep152   | 19 | 8 | 0.9827206960 | KIAA0912 protein                                                                                 |
| 1539 | NM_016174 | CEECAM1  | 19 | 8 | 0.9827049990 | Cerebral endothelial cell adhesion molecule 1                                                    |
| 1540 | NM_005422 | TECTA    | 14 | 5 | 0.9826941620 | Tectorin alpha                                                                                   |
| 1541 | NM_012405 | ICMT     | 19 | 8 | 0.9826170950 | Isoprenylcysteine carboxyl methyltransferase                                                     |
| 1542 | NM_016558 | SCAND1   | 19 | 8 | 0.9826018840 | SCAN domain containing 1                                                                         |
| 1543 | AF147362  |          | 11 | 7 | 0.9825933970 | Full length insert cDNA clone YB63G06                                                            |
| 1544 | NM_015848 | HUMCYT2A | 16 | 5 | 0.9825049570 | Cytokeratin 2                                                                                    |
| 1545 | NM_012338 | TM4SF12  | 13 | 5 | 0.9824717700 | Tetraspanin 12                                                                                   |
| 1546 | AL050374  | ABTB2    | 18 | 6 | 0.9824649020 | Ankyrin repeat and BTB (POZ) domain containing 2                                                 |
| 1547 | NM_014322 | OPN3     | 18 | 8 | 0.9824549210 | Opsin 3 (encephalopsin, panopsin)                                                                |
| 1548 | AL359590  | PGS1     | 19 | 8 | 0.9823961640 | Phosphatidylglycerophosphate synthase                                                            |
| 1549 | NM_004596 | SNRPA    | 19 | 8 | 0.9823585350 | Small nuclear ribonucleoprotein polypeptide A                                                    |

|      |           |          |    |   |              |                                                                           |
|------|-----------|----------|----|---|--------------|---------------------------------------------------------------------------|
| 1550 | NM_014474 | SMPDL3B  | 10 | 7 | 0.9823303840 | Sphingomyelin phosphodiesterase, acid-like 3B                             |
| 1551 | NM_004855 | PIGB     | 18 | 8 | 0.9823292510 | Phosphatidylinositol glycan, class B                                      |
| 1552 | NM_003965 | CCRL2    | 19 | 6 | 0.9822381370 | Chemokine (C-C motif) receptor-like 2                                     |
| 1553 | AF114818  | SIAHBP1  | 19 | 8 | 0.9822342170 | Fuse-binding protein-interacting repressor                                |
| 1554 | NM_004638 | BAT2     | 19 | 7 | 0.9821776240 | HLA-B associated transcript 2                                             |
| 1555 | NM_001131 | CRISP1   | 16 | 5 | 0.9821516270 | Cysteine-rich secretory protein 1                                         |
| 1556 | AK025981  | TMEM38A  | 18 | 7 | 0.9821022850 | Transmembrane protein 38A                                                 |
| 1557 | NM_003463 | PTP4A1   | 19 | 8 | 0.9820811700 | Protein tyrosine phosphatase type IVA, member 1                           |
| 1558 | NM_019055 | ROBO4    | 12 | 6 | 0.9820711530 | Roundabout homolog 4, magic roundabout (Drosophila)                       |
| 1559 | NM_016623 | FAM49B   | 17 | 8 | 0.9820685060 | Family with sequence similarity 49, member B                              |
| 1560 | AL110136  |          | 18 | 8 | 0.9820215810 | Hypothetical LOC401051                                                    |
| 1561 | AK023898  |          | 16 | 6 | 0.9819766600 | CDNA FLJ13836 fis, clone THYRO1000734                                     |
| 1562 | NM_000946 | PRIM1    | 19 | 8 | 0.9819640990 | Primase, polypeptide 1, 49kDa                                             |
| 1563 | NM_013300 | HSU79274 | 18 | 8 | 0.9819587070 | Protein predicted by clone 23733                                          |
| 1564 | NM_020120 | UGCGLI   | 19 | 8 | 0.9819404300 | UDP-glucose ceramide glucosyltransferase-like 1                           |
| 1565 | NM_002051 | GATA3    | 19 | 8 | 0.9819352470 | GATA binding protein 3                                                    |
| 1566 | NM_003035 | SIL      | 19 | 7 | 0.9818805080 | TAL1 (SCL) interrupting locus                                             |
| 1567 | NM_006765 | TUSC3    | 19 | 8 | 0.9818350570 | Tumor suppressor candidate 3                                              |
| 1568 | AF031136  | NCR3     | 12 | 7 | 0.9818346040 | Natural cytotoxicity triggering receptor 3                                |
| 1569 | NM_006725 | CD6      | 18 | 6 | 0.9818320410 | CD6 antigen                                                               |
| 1570 | AB033088  | SYNE1    | 19 | 7 | 0.9818165990 | Spectrin repeat containing, nuclear envelope 1                            |
| 1571 | NM_005813 | PRKD3    | 18 | 8 | 0.9816582440 | Protein kinase D3                                                         |
| 1572 | U37689    | POLR2H   | 19 | 8 | 0.9816065750 | Polymerase (RNA) II (DNA directed) polypeptide H                          |
| 1573 | NM_002714 | PPP1R10  | 13 | 7 | 0.9815568030 | Protein phosphatase 1, regulatory subunit 10                              |
| 1574 | AF052174  | BBX      | 16 | 8 | 0.9815196220 | Bobby sox homolog (Drosophila)                                            |
| 1575 | NM_002128 | HMGB1    | 19 | 8 | 0.9815105260 | High-mobility group box 1                                                 |
| 1576 | NM_002461 | MVD      | 19 | 8 | 0.9814727740 | Mevalonate (diphospho) decarboxylase                                      |
| 1577 | AJ293294  | SGPP1    | 17 | 7 | 0.9814301980 | Sphingosine-1-phosphate phosphatase 1                                     |
| 1578 | NM_012093 | AK5      | 19 | 8 | 0.9814166110 | Adenylate kinase 5                                                        |
| 1579 | NM_000105 |          | 19 | 8 | 0.9813962130 | Data not found                                                            |
| 1580 | NM_007359 | CASC3    | 19 | 7 | 0.9813254530 | Cancer susceptibility candidate 3                                         |
| 1581 | AF162667  | TLK2     | 18 | 8 | 0.9812603190 | Tousled-like kinase 2                                                     |
| 1582 | AK024800  | NFATC2   | 18 | 7 | 0.9812456450 | Nuclear factor of activated T-cells, cytoplasmic, calcineurin-dependent 2 |



|      |           |           |    |   |              |                                                                                                                      |
|------|-----------|-----------|----|---|--------------|----------------------------------------------------------------------------------------------------------------------|
| 1583 | AL359598  | LOC199800 | 16 | 7 | 0.9811846430 | Hypothetical protein LOC199800                                                                                       |
| 1584 | NM_003090 | SNRPA1    | 19 | 8 | 0.9811447120 | Small nuclear ribonucleoprotein polypeptide A'                                                                       |
| 1585 | NM_006069 | MRVI1     | 19 | 8 | 0.9811341510 | Murine retrovirus integration site 1 homolog                                                                         |
| 1586 | AB032964  | TCEB3BP1  | 19 | 8 | 0.9811009370 | Transcription elongation factor B polypeptide 3 binding protein 1                                                    |
| 1587 | NM_001939 | DRP2      | 18 | 8 | 0.9810510090 | Dystrophin related protein 2                                                                                         |
| 1588 | NM_015071 | ARHGAP26  | 17 | 8 | 0.9810177760 | Rho GTPase activating protein 26                                                                                     |
| 1589 | NM_002419 | MAP3K11   | 19 | 8 | 0.9810014630 | Mitogen-activated protein kinase kinase kinase 11                                                                    |
| 1590 | NM_007275 | TUSC2     | 17 | 8 | 0.9809664580 | Tumor suppressor candidate 2                                                                                         |
| 1591 | AK000954  | C13orf10  | 17 | 7 | 0.9809661390 | Chromosome 13 open reading frame 10                                                                                  |
| 1592 | NM_006842 | SF3B2     | 18 | 8 | 0.9809634350 | Splicing factor 3b, subunit 2, 145kDa                                                                                |
| 1593 | NM_018201 | TBC1D13   | 19 | 8 | 0.9807968080 | TBC1 domain family, member 13                                                                                        |
| 1594 | D17266    |           | 19 | 8 | 0.9807926330 | Transcribed locus, strongly similar to XP_537011.1 PREDICTED: similar to 40S ribosomal protein S2 [Canis familiaris] |
| 1595 | AK001296  | SDCCAG3   | 19 | 8 | 0.9807868580 | Serologically defined colon cancer antigen 3                                                                         |
| 1596 | NM_006079 | CITED2    | 19 | 8 | 0.9807736230 | Cbp/p300-interacting transactivator, with Glu/Asp-rich carboxy-terminal domain, 2                                    |
| 1597 | NM_005196 |           | 18 | 8 | 0.9807132900 | Data not found                                                                                                       |
| 1598 | D80001    | KIAA0179  | 19 | 8 | 0.9806504980 | KIAA0179                                                                                                             |
| 1599 | NM_006342 | TACC3     | 18 | 8 | 0.9806466020 | Transforming, acidic coiled-coil containing protein 3                                                                |
| 1600 | NM_017900 | AKIP      | 18 | 8 | 0.9805493300 | Aurora kinase A interacting protein 1                                                                                |
| 1601 | D43948    | ch-TOG    | 19 | 8 | 0.9805265840 | Cytoskeleton associated protein 5                                                                                    |
| 1602 | NM_017826 | FLJ20449  | 18 | 7 | 0.9804811010 | Hypothetical protein FLJ20449                                                                                        |
| 1603 | NM_001478 | GALGT     | 18 | 8 | 0.9804534720 | UDP-N-acetyl-alpha-D-galactosamine:(N-acetylneuraminy)-galactosylglucosylceramide N-acetylgalactosaminyltransferase  |
| 1604 | AK025627  | CABLES1   | 17 | 8 | 0.9804331770 | Cdk5 and Abl enzyme substrate 1                                                                                      |
| 1605 | NM_017571 |           | 19 | 8 | 0.9803426530 | Data not found                                                                                                       |
| 1606 | AB037794  | AMSH-LP   | 19 | 5 | 0.9803059260 | Associated molecule with the SH3 domain of STAM (AMSH) like protein                                                  |
| 1607 | NM_004414 | DSCR1     | 13 | 8 | 0.9803040900 | Down syndrome critical region gene 1                                                                                 |
| 1608 | NM_006101 | KNTC2     | 18 | 8 | 0.9802728060 | Kinetochore associated 2                                                                                             |
| 1609 | NM_012097 | ARL5      | 17 | 7 | 0.9802375720 | ADP-ribosylation factor-like 5                                                                                       |
| 1610 | NM_014298 | QPRT      | 19 | 5 | 0.9802226990 | Quinolate phosphoribosyltransferase (nicotinate-nucleotide pyrophosphorylase (carboxylating))                        |
| 1611 | AL117533  | C20orf51  | 14 | 5 | 0.9801060610 | Chromosome 20 open reading frame 51                                                                                  |
| 1612 | NM_002097 | GTF3A     | 19 | 8 | 0.9800938260 | General transcription factor IIIA                                                                                    |
| 1613 | AF070647  | ARPC1A    | 19 | 8 | 0.9800549680 | Actin related protein 2/3 complex, subunit 1A, 41kDa                                                                 |
| 1614 | NM_007159 | SLMAP     | 16 | 8 | 0.9800524690 | Sarcolemma associated protein                                                                                        |
| 1615 | AB032977  | NAV1      | 19 | 6 | 0.9799837920 | Neuron navigator 1                                                                                                   |

|      |           |           |    |   |              |                                                                                                   |
|------|-----------|-----------|----|---|--------------|---------------------------------------------------------------------------------------------------|
| 1616 | AB020705  | TRIM37    | 18 | 7 | 0.9799807290 | Tripartite motif-containing 37                                                                    |
| 1617 | AK022207  | MLPH      | 17 | 8 | 0.9799663410 | Melanophilin                                                                                      |
| 1618 | NM_017741 | FLJ20280  | 17 | 7 | 0.9799481940 | Hypothetical protein FLJ20280                                                                     |
| 1619 | NM_006538 | BCL2L11   | 19 | 7 | 0.9798741280 | BCL2-like 11 (apoptosis facilitator)                                                              |
| 1620 | NM_003078 | SMARCD3   | 19 | 8 | 0.9798366180 | SWI/SNF related, matrix associated, actin dependent regulator of chromatin, subfamily d, member 3 |
| 1621 | AF254085  | ZNF278    | 19 | 8 | 0.9797955160 | Zinc finger protein 278                                                                           |
| 1622 | AK023202  | SPATS2    | 19 | 8 | 0.9797836750 | Spermatogenesis associated, serine-rich 2                                                         |
| 1623 | NM_007315 | STAT1     | 18 | 8 | 0.9797605570 | Signal transducer and activator of transcription 1, 91kDa                                         |
| 1624 | NM_000647 | CCR2      | 19 | 7 | 0.9797162660 | Chemokine (C-C motif) receptor 2                                                                  |
| 1625 | NM_001906 | CTRB1     | 19 | 8 | 0.9797036340 | Similar to Chymotrypsinogen B precursor                                                           |
| 1626 | NM_001014 | RPS10     | 19 | 8 | 0.9796710900 | Ribosomal protein S10                                                                             |
| 1627 | NM_018188 | ATAD3A    | 18 | 8 | 0.9796591080 | ATPase family, AAA domain containing 3A                                                           |
| 1628 | AF086151  | LOC400966 | 10 | 6 | 0.9796530400 | Plasminogen-like B1                                                                               |
| 1629 | NM_004844 | SH3BP5    | 19 | 8 | 0.9796512470 | SH3-domain binding protein 5 (BTK-associated)                                                     |
| 1630 | NM_003659 | AGPS      | 19 | 7 | 0.9796438120 | Alkylglycerone phosphate synthase                                                                 |
| 1631 | X56692    | CRP       | 19 | 7 | 0.9795989360 | C-reactive protein, pentraxin-related                                                             |
| 1632 | AK022042  | SLC28A3   | 15 | 5 | 0.9795882850 | Solute carrier family 28 (sodium-coupled nucleoside transporter), member 3                        |
| 1633 | NM_006401 | ANP32B    | 19 | 8 | 0.9795619130 | Acidic (leucine-rich) nuclear phosphoprotein 32 family, member B                                  |
| 1634 | AL109688  |           | 17 | 8 | 0.9795488830 | MRNA full length insert cDNA clone EUROIMAGE 131775                                               |
| 1635 | AF026941  | RSAD2     | 19 | 6 | 0.9795427510 | Radical S-adenosyl methionine domain containing 2                                                 |
| 1636 | NM_001069 | TUBB2     | 19 | 8 | 0.9795244100 | Tubulin, beta 2                                                                                   |
| 1637 | AB023197  | KIAA0980  | 18 | 8 | 0.9794147300 | KIAA0980 protein                                                                                  |
| 1638 | NM_016168 |           | 19 | 8 | 0.9794053170 | Data not found                                                                                    |
| 1639 | NM_001671 | ASGR1     | 16 | 8 | 0.9793628880 | Asialoglycoprotein receptor 1                                                                     |
| 1640 | NM_000391 | TPP1      | 19 | 8 | 0.9792644160 | Tripeptidyl peptidase I                                                                           |
| 1641 | AF203728  |           | 15 | 5 | 0.9792447450 | Data not found                                                                                    |
| 1642 | NM_007208 | MRPL3     | 19 | 8 | 0.9791481430 | Mitochondrial ribosomal protein L3                                                                |
| 1643 | NM_002593 | PCOLCE    | 18 | 8 | 0.9791105020 | Procollagen C-endopeptidase enhancer                                                              |
| 1644 | NM_001124 | ADM       | 19 | 8 | 0.9790865720 | Adrenomedullin                                                                                    |
| 1645 | NM_014427 | CPNE7     | 19 | 7 | 0.9790767910 | Copine VII                                                                                        |
| 1646 | NM_005133 | RCE1      | 18 | 7 | 0.9790651280 | RCE1 homolog, prenyl protein protease ( <i>S. cerevisiae</i> )                                    |
| 1647 | AK021945  | MGC13204  | 19 | 7 | 0.9790604920 | Hypothetical protein MGC13204                                                                     |
| 1648 | NM_005204 | MAP3K8    | 19 | 8 | 0.9790392950 | Mitogen-activated protein kinase kinase kinase 8                                                  |

|      |           |           |    |   |              |                                                                                 |
|------|-----------|-----------|----|---|--------------|---------------------------------------------------------------------------------|
| 1649 | NM_001682 | ATP2B1    | 19 | 8 | 0.9789872370 | ATPase, Ca <sup>++</sup> transporting, plasma membrane 1                        |
| 1650 | NM_001250 | CD40      | 17 | 6 | 0.9789810730 | CD40 antigen (TNF receptor superfamily member 5)                                |
| 1651 | NM_004146 | NDUFB7    | 19 | 8 | 0.9789673660 | NADH dehydrogenase (ubiquinone) 1 beta subcomplex, 7, 18kDa                     |
| 1652 | M61906    | PIK3R1    | 19 | 8 | 0.9788353910 | Phosphoinositide-3-kinase, regulatory subunit 1 (p85 alpha)                     |
| 1653 | NM_003557 | PIP5K1A   | 19 | 8 | 0.9787758150 | Phosphatidylinositol-4-phosphate 5-kinase, type I, alpha                        |
| 1654 | NM_003084 | SNAPC3    | 19 | 8 | 0.9787577680 | Small nuclear RNA activating complex, polypeptide 3, 50kDa                      |
| 1655 | AK025273  | EGLN3     | 19 | 8 | 0.9787093460 | Egl nine homolog 3 (C. elegans)                                                 |
| 1656 | AB018353  | UNC84A    | 19 | 8 | 0.9786744230 | Unc-84 homolog A (C. elegans)                                                   |
| 1657 | AK000821  | MOV10     | 19 | 8 | 0.9786599200 | Mov10, Moloney leukemia virus 10, homolog (mouse)                               |
| 1658 | NM_017870 | HSPA5BP1  | 19 | 8 | 0.9786284360 | Heat shock 70kDa protein 5 (glucose-regulated protein, 78kDa) binding protein 1 |
| 1659 | NM_001023 | RPS20     | 19 | 8 | 0.9786223140 | Ribosomal protein S20                                                           |
| 1660 | AK026699  | C6orf157  | 15 | 7 | 0.9785856030 | Chromosome 6 open reading frame 157                                             |
| 1661 | NM_006403 | NEDD9     | 17 | 7 | 0.9785422200 | Neural precursor cell expressed, developmentally down-regulated 9               |
| 1662 | NM_018198 | DNAJC11   | 19 | 8 | 0.9785394290 | DnaJ (Hsp40) homolog, subfamily C, member 11                                    |
| 1663 | AF086000  | XPNPEP1   | 14 | 6 | 0.9783983440 | X-prolyl aminopeptidase (aminopeptidase P) 1, soluble                           |
| 1664 | NM_014823 |           | 17 | 8 | 0.9783489540 | Data not found                                                                  |
| 1665 | AK024137  | FLJ14075  | 19 | 8 | 0.9783235610 | Hypothetical LOC79954                                                           |
| 1666 | AK024801  | FLJ21148  | 19 | 8 | 0.9783094980 | Hypothetical protein FLJ21148                                                   |
| 1667 | AF147307  | FLJ21687  | 19 | 7 | 0.9781947990 | PDZ domain containing, X chromosome                                             |
| 1668 | NM_000372 | TYR       | 18 | 7 | 0.9781739350 | Tyrosinase (oculocutaneous albinism IA)                                         |
| 1669 | NM_003219 | TERT      | 18 | 8 | 0.9780064370 | Telomerase reverse transcriptase                                                |
| 1670 | U63041    | NCAM1     | 19 | 7 | 0.9779547020 | Neural cell adhesion molecule 1                                                 |
| 1671 | NM_005648 | TCEB1     | 19 | 8 | 0.9779410290 | Transcription elongation factor B (SIII), polypeptide 1 (15kDa, elongin C)      |
| 1672 | NM_016436 | PHF20     | 19 | 8 | 0.9779233180 | PHD finger protein 20                                                           |
| 1673 | NM_004427 | PHC2      | 19 | 8 | 0.9779180210 | Polyhomeotic-like 2 (Drosophila)                                                |
| 1674 | AL359594  | A2BP1     | 13 | 5 | 0.9778697650 | Ataxin 2-binding protein 1                                                      |
| 1675 | D84294    | TTC3      | 17 | 8 | 0.9778682610 | Tetratricopeptide repeat domain 3                                               |
| 1676 | NM_005273 | GNB2      | 19 | 8 | 0.9778532430 | Guanine nucleotide binding protein (G protein), beta polypeptide 2              |
| 1677 | NM_006267 | RANBP2    | 19 | 7 | 0.9778423420 | RAN binding protein 2                                                           |
| 1678 | NM_001417 | EIF4B     | 19 | 8 | 0.9777815050 | Eukaryotic translation initiation factor 4B                                     |
| 1679 | NM_014726 | ProSAPiP2 | 13 | 8 | 0.9777771540 | ProSAPiP2 protein                                                               |
| 1680 | NM_015626 | WSB1      | 19 | 8 | 0.9776508860 | WD repeat and SOCS box-containing 1                                             |
| 1681 | NM_004483 | GCSH      | 18 | 8 | 0.9776258880 | Glycine cleavage system protein H (aminomethyl carrier)                         |

|      |           |          |    |   |              |                                                                                 |
|------|-----------|----------|----|---|--------------|---------------------------------------------------------------------------------|
| 1682 | NM_017941 | HLC-8    | 18 | 7 | 0.9776077310 | Lung cancer-related protein 8                                                   |
| 1683 | L49054    | MLF1     | 19 | 8 | 0.9775353790 | Myeloid leukemia factor 1                                                       |
| 1684 | NM_002873 | RAD17    | 18 | 8 | 0.9775322230 | RAD17 homolog (S. pombe)                                                        |
| 1685 | U23028    | EIF2B5   | 19 | 8 | 0.9775135570 | Eukaryotic translation initiation factor 2B, subunit 5 epsilon, 82kDa           |
| 1686 | AF074989  | HYPB     | 14 | 5 | 0.9775087160 | Huntingtin interacting protein B                                                |
| 1687 | AB006624  | KIAA0286 | 16 | 8 | 0.9774964680 | KIAA0286 protein                                                                |
| 1688 | NM_019044 | FLJ10996 | 19 | 8 | 0.9771900150 | Hypothetical protein FLJ10996                                                   |
| 1689 | NM_000756 | CRH      | 14 | 5 | 0.9771548310 | Corticotropin releasing hormone                                                 |
| 1690 | AL117482  | ULK3     | 18 | 8 | 0.9771261350 | Unc-51-like kinase 3 (C. elegans)                                               |
| 1691 | NM_017615 | C10orf86 | 18 | 8 | 0.9771209150 | Chromosome 10 open reading frame 86                                             |
| 1692 | NM_017892 |          | 19 | 8 | 0.9770894290 | Data not found                                                                  |
| 1693 | NM_004088 | DNTT     | 19 | 8 | 0.9770022780 | Deoxynucleotidyltransferase, terminal                                           |
| 1694 | U80764    |          | 18 | 8 | 0.9769772440 | Data not found                                                                  |
| 1695 | AK000311  | CRKL     | 19 | 8 | 0.9769702840 | V-crk sarcoma virus CT10 oncogene homolog (avian)-like                          |
| 1696 | NM_004792 | PPIG     | 19 | 8 | 0.9768178230 | Peptidyl-prolyl isomerase G (cyclophilin G)                                     |
| 1697 | L40410    | TRIP3    | 19 | 8 | 0.9767369200 | Thyroid hormone receptor interactor 3                                           |
| 1698 | NM_000185 | SERPIND1 | 15 | 8 | 0.9766785030 | Serine (or cysteine) proteinase inhibitor, clade D (heparin cofactor), member 1 |
| 1699 | U90549    |          | 19 | 8 | 0.9766374690 | Data not found                                                                  |
| 1700 | NM_001357 | DHX9     | 19 | 8 | 0.9765626660 | DEAH (Asp-Glu-Ala-His) box polypeptide 9                                        |
| 1701 | AL389876  | DERL3    | 17 | 8 | 0.9765379920 | Der1-like domain family, member 3                                               |
| 1702 | AB011138  | ATP10A   | 18 | 6 | 0.9765046110 | ATPase, Class V, type 10A                                                       |
| 1703 | NM_001254 | CDC6     | 19 | 7 | 0.9763872980 | CDC6 cell division cycle 6 homolog (S. cerevisiae)                              |
| 1704 | X59417    | PSMA6    | 19 | 8 | 0.9763595270 | Proteasome (prosome, macropain) subunit, alpha type, 6                          |
| 1705 | NM_004223 | UBE2L6   | 19 | 8 | 0.9763564380 | Ubiquitin-conjugating enzyme E2L 6                                              |
| 1706 | NM_004229 | CRSP2    | 19 | 8 | 0.9763496400 | Cofactor required for Sp1 transcriptional activation, subunit 2, 150kDa         |
| 1707 | NM_004517 | ILK      | 18 | 8 | 0.9762692540 | Integrin-linked kinase-2                                                        |
| 1708 | AL162054  |          | 13 | 7 | 0.9762353070 | Data not found                                                                  |
| 1709 | NM_002015 | FOXO1A   | 19 | 8 | 0.9761466440 | Forkhead box O1A (rhabdomyosarcoma)                                             |
| 1710 | NM_006297 | XRCC1    | 19 | 8 | 0.9761222940 | X-ray repair complementing defective repair in Chinese hamster cells 1          |
| 1711 | NM_007195 | POLI     | 19 | 8 | 0.9760458180 | Polymerase (DNA directed) iota                                                  |
| 1712 | AL137344  |          | 11 | 5 | 0.9760338370 | MRNA; cDNA DKFZp76111311 (from clone DKFZp76111311)                             |
| 1713 | AK022591  | FLJ12529 | 19 | 8 | 0.9760311020 | Pre-mRNA cleavage factor I, 59 kDa subunit                                      |
| 1714 | AF086224  | KIAA0663 | 19 | 6 | 0.9759161260 | Zinc finger CCCH-type containing 11A                                            |

|      |           |          |    |   |              |                                                                                   |
|------|-----------|----------|----|---|--------------|-----------------------------------------------------------------------------------|
| 1715 | NM_000156 | GAMT     | 18 | 8 | 0.9759000340 | Guanidinoacetate N-methyltransferase                                              |
| 1716 | NM_018845 | LOC55974 | 17 | 7 | 0.9758731760 | Stromal cell protein                                                              |
| 1717 | NM_000885 | ITGA4    | 18 | 6 | 0.9758582030 | Integrin, alpha 4 (antigen CD49D, alpha 4 subunit of VLA-4 receptor)              |
| 1718 | AF086272  |          | 16 | 7 | 0.9758137030 | Full length insert cDNA clone ZD44H09                                             |
| 1719 | AF227924  | SIGLEC9  | 17 | 6 | 0.9758105920 | Sialic acid binding Ig-like lectin 9                                              |
| 1720 | NM_001044 | SLC6A3   | 16 | 6 | 0.9757699320 | Solute carrier family 6 (neurotransmitter transporter, dopamine), member 3        |
| 1721 | AF149019  | PLXNB3   | 18 | 7 | 0.9757614780 | Plexin B3                                                                         |
| 1722 | NM_004873 | BAG5     | 19 | 8 | 0.9757359600 | BCL2-associated athanogene 5                                                      |
| 1723 | NM_005412 | SHMT2    | 18 | 8 | 0.9756528020 | Serine hydroxymethyltransferase 2 (mitochondrial)                                 |
| 1724 | NM_014505 | KCNMB4   | 19 | 6 | 0.9755769760 | Potassium large conductance calcium-activated channel, subfamily M, beta member 4 |
| 1725 | AK024518  | FLJ22490 | 15 | 7 | 0.9755679050 | Centrosome spindle pole associated protein                                        |
| 1726 | NM_006067 | NOC4     | 19 | 8 | 0.9755387990 | COX4 neighbor                                                                     |
| 1727 | NM_002140 | HNRPK    | 19 | 8 | 0.9754709180 | Heterogeneous nuclear ribonucleoprotein K                                         |
| 1728 | NM_002729 | HHEX     | 18 | 7 | 0.9753870770 | Hematopoietically expressed homeobox                                              |
| 1729 | NM_016473 |          | 19 | 8 | 0.9753477030 | Data not found                                                                    |
| 1730 | AL359559  | AGPS     | 17 | 7 | 0.9753197920 | Alkylglycerone phosphate synthase                                                 |
| 1731 | NM_006812 | OS-9     | 19 | 8 | 0.9753033230 | Amplified in osteosarcoma                                                         |
| 1732 | NM_003600 | STK6     | 18 | 8 | 0.9752548890 | Serine/threonine kinase 6                                                         |
| 1733 | AL137619  |          | 13 | 6 | 0.9752189130 | Similar to mFLJ00251 protein                                                      |
| 1734 | NM_019604 | CRTAM    | 14 | 6 | 0.9752174670 | Class-I MHC-restricted T cell associated molecule                                 |
| 1735 | NM_001493 | GDI1     | 19 | 8 | 0.9751283080 | GDP dissociation inhibitor 1                                                      |
