# Supplementary material
Source: PubMed Central journal article supplement (PMC1860543)
Supplement: jclinpath_jcp.2005.035451_2.pdf [file jclinpath_jcp.2005.035451_2.pdf]

## Complimentary information 2: Downregulated in HNSCC vs normal mucosa

| Ranknumber | GEN_ID    | Symbol   | HNSCC (N) | Normal (N) | PSTUDENT     | Name                                                                     |
|------------|-----------|----------|-----------|------------|--------------|--------------------------------------------------------------------------|
| 1          | AF317550  | PERP     | 19        | 8          | 0.0000000000 | PERP, TP53 apoptosis effector                                            |
| 2          | AK000006  |          | 19        | 8          | 0.0000000000 | Data not found                                                           |
| 3          | NM_016190 | C1orf10  | 19        | 8          | 0.0000000000 | Cornulin                                                                 |
| 4          | NM_002435 | MPI      | 18        | 8          | 0.0000000000 | Mannose phosphate isomerase                                              |
| 5          | NM_002964 | S100A8   | 18        | 8          | 0.0000000000 | S100 calcium binding protein A8 (calgranulin A)                          |
| 6          | NM_004425 | ECM1     | 19        | 8          | 0.0000000000 | Extracellular matrix protein 1                                           |
| 7          | NM_001423 | EMP1     | 17        | 8          | 0.0000000000 | Epithelial membrane protein 1                                            |
| 8          | NM_002575 | SERPINB2 | 19        | 8          | 0.0000000000 | Serine (or cysteine) proteinase inhibitor, clade B (ovalbumin)           |
| 9          | AB019573  | HOP      | 18        | 6          | 0.0000000000 | Homeodomain-only protein                                                 |
| 10         | NM_012128 | CLCA4    | 14        | 6          | 0.0000000000 | Chloride channel, calcium activated, family member 4                     |
| 11         | NM_001714 | BICD1    | 18        | 8          | 0.0000000000 | Bicaudal D homolog 1 (Drosophila)                                        |
| 12         | NM_012242 | DKK1     | 19        | 8          | 0.0000000000 | Dickkopf homolog 1 (Xenopus laevis)                                      |
| 13         | NM_003125 | SPRR1B   | 14        | 8          | 0.0000000000 | Small proline-rich protein 1B (cornifin)                                 |
| 14         | NM_017567 | NAGK     | 19        | 8          | 0.0000000000 | N-acetylglucosamine kinase                                               |
| 15         | NM_006113 | VAV3     | 18        | 7          | 0.0000000000 | Vav 3 oncogene                                                           |
| 16         | NM_018180 | DHX32    | 19        | 8          | 0.0000000000 | DEAH (Asp-Glu-Ala-His) box polypeptide 32                                |
| 17         | U17077    | BENE     | 19        | 8          | 0.0000000000 | BENE protein                                                             |
| 18         | U90653    | ZDHHC1   | 19        | 8          | 0.0000000000 | Zinc finger, DHHC-type containing 1                                      |
| 19         | NM_000700 | ANXA1    | 19        | 8          | 0.0000000000 | Annexin A1                                                               |
| 20         | NM_015961 |          | 18        | 8          | 0.0000000001 | Data not found                                                           |
| 21         | NM_005084 | PLA2G7   | 19        | 8          | 0.0000000001 | Phospholipase A2, group VII (platelet-activating factor acetylhydrolase  |
| 22         | NM_012307 | EPB41L3  | 19        | 8          | 0.0000000001 | Erythrocyte membrane protein band 4.1-like 3                             |
| 23         | M93056    | SERPINB1 | 17        | 8          | 0.0000000001 | Serine (or cysteine) proteinase inhibitor, clade B (ovalbumin), member 1 |
| 24         | AB033768  | PADI1    | 19        | 8          | 0.0000000002 | Peptidyl arginine deiminase, type I                                      |
| 25         | NM_003843 | SCEL     | 17        | 8          | 0.0000000002 | Sciellin                                                                 |
| 26         | NM_001963 | EGF      | 14        | 7          | 0.0000000002 | Epidermal growth factor (beta-urogastrone)                               |
| 27         | NM_006261 | PROP1    | 17        | 8          | 0.0000000004 | Prophet of Pit1, paired-like homeodomain transcription factor            |
| 28         | NM_002653 | PITX1    | 19        | 8          | 0.0000000004 | Paired-like homeodomain transcription factor 1                           |
| 29         | NM_005476 | GNE      | 19        | 8          | 0.0000000005 | Glucosamine (UDP-N-acetyl)-2-epimerase/N-acetylmannosamine kinase        |
| 30         | NM_004925 | AQP3     | 19        | 7          | 0.0000000005 | Aquaporin 3                                                              |
| 31         | NM_014872 | ZBTB5    | 19        | 8          | 0.0000000005 | Zinc finger and BTB domain containing 5                                  |

|    |           |               |    |   |              |                                                                                 |
|----|-----------|---------------|----|---|--------------|---------------------------------------------------------------------------------|
| 32 | NM_015416 | LETMD1        | 19 | 7 | 0.0000000005 | LETM1 domain containing 1                                                       |
| 33 | NM_005547 | IVL           | 18 | 8 | 0.0000000005 | Involucrin                                                                      |
| 34 | AF272036  | RRAGD         | 18 | 7 | 0.0000000006 | Ras-related GTP binding D                                                       |
| 35 | AL117612  | MAL2          | 19 | 8 | 0.0000000009 | Mal, T-cell differentiation protein 2                                           |
| 36 | AK024495  | DKFZp761L1518 | 18 | 8 | 0.0000000009 | Hypothetical protein DKFZp761L1518                                              |
| 37 | NM_003625 | PPFIA2        | 17 | 6 | 0.0000000010 | Protein tyrosine phosphatase, receptor type, f polypeptide (PTPRF)              |
| 38 | NM_006846 | SPINK5        | 14 | 7 | 0.0000000011 | Serine protease inhibitor, Kazal type 5                                         |
| 39 | NM_014349 | APOL3         | 19 | 8 | 0.0000000012 | Apolipoprotein L, 3                                                             |
| 40 | NM_003869 | CES2          | 19 | 8 | 0.0000000015 | Carboxylesterase 2 (intestine, liver)                                           |
| 41 | NM_002307 | LGALS7        | 15 | 6 | 0.0000000017 | Lectin, galactoside-binding, soluble, 7 (galectin 7)                            |
| 42 | AK026256  | MGC4171       | 19 | 8 | 0.0000000017 | Glycerophosphodiester phosphodiesterase domain containing 3                     |
| 43 | NM_002371 | MAL           | 18 | 8 | 0.0000000018 | Mal, T-cell differentiation protein                                             |
| 44 | NM_002353 | TACSTD2       | 18 | 8 | 0.0000000019 | Tumor-associated calcium signal transducer 2                                    |
| 45 | NM_002130 | HMGCS1        | 19 | 8 | 0.0000000019 | 3-hydroxy-3-methylglutaryl-Coenzyme A synthase 1 (soluble)                      |
| 46 | NM_007283 | MGLL          | 19 | 7 | 0.0000000020 | Monoglyceride lipase                                                            |
| 47 | NM_000860 | HPGD          | 19 | 6 | 0.0000000021 | Hydroxyprostaglandin dehydrogenase 15-(NAD)                                     |
| 48 | NM_001988 | EVPL          | 19 | 8 | 0.0000000024 | Envoplakin                                                                      |
| 49 | AK023766  | XLHRSF-1      | 18 | 7 | 0.0000000024 | Dynein, axonemal, heavy polypeptide 1                                           |
| 50 | NM_013279 | C11orf9       | 18 | 7 | 0.0000000026 | Chromosome 11 open reading frame 9                                              |
| 51 | M55646    | IL1RN         | 17 | 8 | 0.0000000029 | Interleukin 1 receptor antagonist                                               |
| 52 | NM_014870 | KIAA0478      | 19 | 8 | 0.0000000032 | Zinc finger and BTB domain containing 40                                        |
| 53 | NM_001562 | IL18          | 18 | 8 | 0.0000000033 | Interleukin 18 (interferon-gamma-inducing factor)                               |
| 54 | AF131754  | SH3BGRL2      | 15 | 8 | 0.0000000033 | SH3 domain binding glutamic acid-rich protein like 2                            |
| 55 | NM_005978 | S100A2        | 17 | 8 | 0.0000000034 | S100 calcium binding protein A2                                                 |
| 56 | NM_006164 | NFE2L2        | 19 | 8 | 0.0000000036 | Nuclear factor (erythroid-derived 2)-like 2                                     |
| 57 | NM_002956 | RSN           | 17 | 8 | 0.0000000043 | Restin (Reed-Steinberg cell-expressed intermediate filament-associated protein) |
| 58 | NM_002638 | PI3           | 18 | 7 | 0.0000000045 | Protease inhibitor 3, skin-derived (SKALP)                                      |
| 59 | NM_000100 | CSTB          | 19 | 8 | 0.0000000046 | Cystatin B (stefin B)                                                           |
| 60 | NM_019069 | WDR5B         | 17 | 8 | 0.0000000079 | WD repeat domain 5B                                                             |
| 61 | NM_018389 | SLC35C1       | 18 | 8 | 0.0000000095 | Solute carrier family 35, member C1                                             |
| 62 | NM_004035 | ACOX1         | 19 | 8 | 0.0000000101 | Acyl-Coenzyme A oxidase 1, palmitoyl                                            |
| 63 | NM_002676 | PMM1          | 19 | 8 | 0.0000000105 | Phosphomannomutase 1                                                            |
| 64 | NM_019027 | FLJ20273      | 19 | 8 | 0.0000000114 | RNA-binding protein                                                             |

|    |           |          |    |   |              |                                                                                                    |
|----|-----------|----------|----|---|--------------|----------------------------------------------------------------------------------------------------|
| 65 | NM_004436 | ENSA     | 17 | 8 | 0.0000000116 | Endosulfine alpha                                                                                  |
| 66 | AY007220  | S100A14  | 19 | 8 | 0.0000000117 | S100 calcium binding protein A14                                                                   |
| 67 | AL137264  | AIM1L    | 17 | 8 | 0.0000000121 | Absent in melanoma 1-like                                                                          |
| 68 | NM_004314 | ART1     | 19 | 8 | 0.0000000122 | ADP-ribosyltransferase 1                                                                           |
| 69 | AF086924  | PPP2R2C  | 15 | 6 | 0.0000000123 | Protein phosphatase 2 (formerly 2A), regulatory subunit B (PR 52), gamma isoform                   |
| 70 | NM_003810 | TNFSF10  | 19 | 7 | 0.0000000124 | Tumor necrosis factor (ligand) superfamily, member 10                                              |
| 71 | AL137346  | C6orf155 | 17 | 8 | 0.0000000140 | Chromosome 6 open reading frame 155                                                                |
| 72 | NM_017410 | HOXC13   | 18 | 8 | 0.0000000146 | Homeo box C13                                                                                      |
| 73 | AK025905  | SOX17    | 19 | 8 | 0.0000000146 | SRY (sex determining region Y)-box 17                                                              |
| 74 | NM_003956 | CH25H    | 17 | 8 | 0.0000000178 | Cholesterol 25-hydroxylase                                                                         |
| 75 | NM_001756 | SERPINA6 | 19 | 8 | 0.0000000193 | Serine (or cysteine) proteinase inhibitor, clade A (alpha-1 antiproteinase, antitrypsin), member 6 |
| 76 | AB040890  | PITPNM2  | 18 | 8 | 0.0000000195 | Phosphatidylinositol transfer protein, membrane-associated 2                                       |
| 77 | NM_000054 | AVPR2    | 19 | 8 | 0.0000000208 | Arginine vasopressin receptor 2 (nephrogenic diabetes insipidus)                                   |
| 78 | NM_003407 | ZFP36    | 19 | 8 | 0.0000000269 | Zinc finger protein 36, C3H type, homolog (mouse)                                                  |
| 79 | NM_000668 | ADH1B    | 18 | 7 | 0.0000000319 | Alcohol dehydrogenase IB (class I), beta polypeptide                                               |
| 80 | NM_001311 | CRIP1    | 19 | 8 | 0.0000000339 | Cysteine-rich protein 1 (intestinal)                                                               |
| 81 | NM_019060 | C1orf42  | 16 | 8 | 0.0000000343 | Chromosome 1 open reading frame 42                                                                 |
| 82 | M14200    | DBI      | 19 | 8 | 0.0000000357 | Diazepam binding inhibitor (GABA receptor modulator, acyl-Coenzyme A binding protein)              |
| 83 | NM_006061 | CRISP3   | 15 | 8 | 0.0000000384 | Cysteine-rich secretory protein 3                                                                  |
| 84 | NM_014365 | HSPB8    | 19 | 8 | 0.0000000396 | Heat shock 22kDa protein 8                                                                         |
| 85 | NM_014400 | C4.4A    | 19 | 8 | 0.0000000406 | GPI-anchored metastasis-associated protein homolog                                                 |
| 86 | NM_003722 | TP73L    | 19 | 6 | 0.0000000418 | Tumor protein p73-like                                                                             |
| 87 | AF052693  | GJB5     | 19 | 8 | 0.0000000432 | Gap junction protein, beta 5 (connexin 31.1)                                                       |
| 88 | NM_004581 | RABGGTA  | 19 | 8 | 0.0000000475 | Rab geranylgeranyltransferase, alpha subunit                                                       |
| 89 | NM_005558 | LAD1     | 18 | 6 | 0.0000000489 | Ladinin 1                                                                                          |
| 90 | AK026110  | FLJ22457 | 19 | 8 | 0.0000000493 | Hypothetical protein FLJ22457                                                                      |
| 91 | AK026212  | OBFC1    | 16 | 5 | 0.0000000535 | Chromosome 21 open reading frame 53                                                                |
| 92 | NM_000673 | ADH7     | 19 | 8 | 0.0000000535 | Alcohol dehydrogenase 7 (class IV), mu or sigma polypeptide                                        |
| 93 | AB032952  | KIAA1126 | 19 | 8 | 0.0000000564 | KIAA1126 protein                                                                                   |
| 94 | NM_016061 | YPEL5    | 19 | 8 | 0.0000000567 | Yippee-like 5 (Drosophila)                                                                         |
| 95 | NM_003658 | BARX2    | 19 | 8 | 0.0000000598 | BarH-like homeobox 2                                                                               |
| 96 | Z36842    |          | 12 | 6 | 0.0000000605 | Data not found                                                                                     |
| 97 | AL137459  | HYPC     | 17 | 7 | 0.0000000615 | Huntingtin interacting protein C                                                                   |

|     |           |           |    |   |              |                                                                                                    |
|-----|-----------|-----------|----|---|--------------|----------------------------------------------------------------------------------------------------|
| 98  | AL050220  | KLK13     | 16 | 8 | 0.0000000619 | Kallikrein 13                                                                                      |
| 99  | NM_002084 | GPX3      | 19 | 8 | 0.0000000645 | Glutathione peroxidase 3 (plasma)                                                                  |
| 100 | NM_017729 | EPS8L1    | 18 | 8 | 0.0000000680 | EPS8-like 1                                                                                        |
| 101 | AF126028  | FBXL3     | 19 | 7 | 0.0000000681 | F-box and leucine-rich repeat protein 3                                                            |
| 102 | NM_005228 | EGFR      | 18 | 8 | 0.0000000691 | Epidermal growth factor receptor (erythroblastic leukemia viral (v-erb-b) oncogene homolog, avian) |
| 103 | NM_003081 | SNAP25    | 19 | 8 | 0.0000000741 | Synaptosomal-associated protein, 25kDa                                                             |
| 104 | AK025416  |           | 19 | 6 | 0.0000000829 | Homo sapiens, clone IMAGE:6198912, mRNA                                                            |
| 105 | AF174600  | LMO7      | 19 | 8 | 0.0000000864 | LIM domain 7                                                                                       |
| 106 | AF086436  | LOC147645 | 13 | 7 | 0.0000000932 | Hypothetical protein LOC147645                                                                     |
| 107 | NM_016358 | IRX4      | 19 | 6 | 0.0000000940 | Iroquois homeobox protein 4                                                                        |
| 108 | D86980    | TTC9      | 19 | 8 | 0.0000000946 | Tetratricopeptide repeat domain 9                                                                  |
| 109 | NM_016032 | ZDHHC9    | 19 | 8 | 0.0000000999 | Zinc finger, DHHC-type containing 9                                                                |
| 110 | NM_004073 | PLK3      | 19 | 7 | 0.0000001012 | Polo-like kinase 3 (Drosophila)                                                                    |
| 111 | NM_001799 | CDK7      | 19 | 8 | 0.0000001042 | Cyclin-dependent kinase 7 (MO15 homolog, Xenopus laevis, cdk-activating kinase)                    |
| 112 | NM_006853 | KLK11     | 18 | 8 | 0.0000001055 | Kallikrein 11                                                                                      |
| 113 | NM_004419 | DUSP5     | 19 | 8 | 0.0000001060 | Dual specificity phosphatase 5                                                                     |
| 114 | NM_004678 | BPY2      | 18 | 5 | 0.0000001083 | Basic charge, Y-linked, 2                                                                          |
| 115 | NM_003329 | TXN       | 19 | 8 | 0.0000001152 | Thioredoxin                                                                                        |
| 116 | AL137614  | ANKRD16   | 19 | 8 | 0.0000001164 | Ankyrin repeat domain 16                                                                           |
| 117 | NM_000747 | CHRNA1    | 19 | 8 | 0.0000001166 | Cholinergic receptor, nicotinic, beta polypeptide 1 (muscle)                                       |
| 118 | NM_003270 | TM4SF6    | 19 | 7 | 0.0000001290 | Tetraspanin 6                                                                                      |
| 119 | NM_000359 | TGM1      | 17 | 7 | 0.0000001306 | Transglutaminase 1 (K polypeptide epidermal type I, protein-glutamine-gamma-glutamyltransferase)   |
| 120 | X07695    | KRT4      | 15 | 8 | 0.0000001336 | Keratin 4                                                                                          |
| 121 | NM_001263 | CDS1      | 17 | 7 | 0.0000001341 | CDP-diacylglycerol synthase (phosphatidate cytidylyltransferase) 1                                 |
| 122 | NM_014035 | SNX24     | 18 | 6 | 0.0000001363 | Sorting nexin 24                                                                                   |
| 123 | NM_020427 | SLURP1    | 19 | 8 | 0.0000001413 | Secreted LY6/PLAUR domain containing 1                                                             |
| 124 | NM_017632 | CARF      | 17 | 7 | 0.0000001436 | Collaborates/cooperates with ARF (alternate reading frame) protein                                 |
| 125 | AF161420  | MGC16169  | 18 | 8 | 0.0000001496 | Hypothetical protein MGC16169                                                                      |
| 126 | U84516    |           | 19 | 7 | 0.0000001636 | Data not found                                                                                     |
| 127 | NM_003702 | RGS20     | 19 | 8 | 0.0000001722 | Regulator of G-protein signalling 20                                                               |
| 128 | NM_016321 | RHCG      | 16 | 7 | 0.0000001744 | Rhesus blood group, C glycoprotein                                                                 |
| 129 | NM_000846 | GSTA2     | 19 | 7 | 0.0000001774 | Glutathione S-transferase A2                                                                       |
| 130 | AL133030  | KIAA1666  | 19 | 8 | 0.0000001821 | KIAA1666 protein                                                                                   |

|     |           |           |    |   |              |                                                                                                |
|-----|-----------|-----------|----|---|--------------|------------------------------------------------------------------------------------------------|
| 131 | AB028992  | PLCL3     | 13 | 7 | 0.0000001913 | Phospholipase C-like 3                                                                         |
| 132 | AK026436  | ARRDC4    | 14 | 7 | 0.0000001987 | Arrestin domain containing 4                                                                   |
| 133 | NM_001878 | CRABP2    | 19 | 8 | 0.0000002109 | Cellular retinoic acid binding protein 2                                                       |
| 134 | AK026223  | DOK3      | 17 | 7 | 0.0000002143 | Docking protein 3                                                                              |
| 135 | AK024480  | LOC126917 | 19 | 8 | 0.0000002158 | Hypothetical protein LOC126917                                                                 |
| 136 | NM_000691 | ALDH3A1   | 17 | 8 | 0.0000002173 | Aldehyde dehydrogenase 3 family, member A1                                                     |
| 137 | NM_013436 | NCKAP1    | 18 | 8 | 0.0000002195 | NCK-associated protein 1                                                                       |
| 138 | NM_020474 | GALNT1    | 18 | 8 | 0.0000002199 | UDP-N-acetyl-alpha-D-galactosamine:polypeptide N-acetylgalactosaminyltransferase 1 (GalNAc-T1) |
| 139 | NM_002447 | MST1R     | 18 | 7 | 0.0000002204 | Macrophage stimulating 1 receptor (c-met-related tyrosine kinase)                              |
| 140 | M29540    | CEACAM5   | 17 | 8 | 0.0000002277 | Carcinoembryonic antigen-related cell adhesion molecule 5                                      |
| 141 | NM_020387 | RAB25     | 19 | 8 | 0.0000002328 | RAB25, member RAS oncogene family                                                              |
| 142 | AK026324  | FLJ22671  | 16 | 7 | 0.0000002391 | Hypothetical protein FLJ22671                                                                  |
| 143 | NM_001312 | CRIP2     | 19 | 8 | 0.0000002396 | Cysteine-rich protein 2                                                                        |
| 144 | NM_004362 | CLGN      | 19 | 8 | 0.0000002430 | Calmegin                                                                                       |
| 145 | AL110157  | DUSP7     | 15 | 8 | 0.0000002659 | Dual specificity phosphatase 7                                                                 |
| 146 | NM_006422 | AKAP3     | 19 | 7 | 0.0000002736 | A kinase (PRKA) anchor protein 3                                                               |
| 147 | NM_007150 | ZNF185    | 19 | 8 | 0.0000002874 | Zinc finger protein 185 (LIM domain)                                                           |
| 148 | M83822    | LRBA      | 17 | 8 | 0.0000003046 | LPS-responsive vesicle trafficking, beach and anchor containing                                |
| 149 | NM_006919 | SERPINB3  | 19 | 8 | 0.0000003294 | Serine (or cysteine) proteinase inhibitor, clade B (ovalbumin), member 3                       |
| 150 | NM_014552 | TFCP2L2   | 19 | 8 | 0.0000003338 | Grainyhead-like 1 (Drosophila)                                                                 |
| 151 | AB046836  | TRPM3     | 19 | 8 | 0.0000003392 | Transient receptor potential cation channel, subfamily M, member 3                             |
| 152 | NM_006194 | PAX9      | 18 | 8 | 0.0000003653 | Paired box gene 9                                                                              |
| 153 | NM_019885 | CYP26B1   | 19 | 8 | 0.0000003740 | Cytochrome P450, family 26, subfamily B, polypeptide 1                                         |
| 154 | NM_018073 | TRIM68    | 16 | 8 | 0.0000003918 | Tripartite motif-containing 68                                                                 |
| 155 | AF086315  | ZD52F10   | 12 | 6 | 0.0000004069 | Dermokine                                                                                      |
| 156 | NM_005672 | PSCA      | 18 | 7 | 0.0000004593 | Prostate stem cell antigen                                                                     |
| 157 | NM_005773 | ZNF256    | 19 | 8 | 0.0000004607 | Zinc finger protein 256                                                                        |
| 158 | NM_020435 | GJA12     | 19 | 6 | 0.0000004768 | Gap junction protein, alpha 12, 47kDa                                                          |
| 159 | U47646    | ECG2      | 15 | 6 | 0.0000004894 | Esophagus cancer-related gene-2                                                                |
| 160 | NM_006390 | IPO8      | 18 | 7 | 0.0000005123 | Importin 8                                                                                     |
| 161 | M22538    | NDUFV2    | 19 | 8 | 0.0000005210 | NADH dehydrogenase (ubiquinone) flavoprotein 2, 24kDa                                          |
| 162 | AL157504  |           | 12 | 7 | 0.0000005219 | MRNA; cDNA DKFZp586O0724 (from clone DKFZp586O0724)                                            |
| 163 | AK000757  | SORT1     | 19 | 8 | 0.0000005342 | Sortilin 1                                                                                     |

|     |           |           |    |   |              |                                                                                  |
|-----|-----------|-----------|----|---|--------------|----------------------------------------------------------------------------------|
| 164 | AF069469  | SC5DL     | 17 | 8 | 0.0000005428 | Sterol-C5-desaturase (ERG3 delta-5-desaturase homolog, fungal)-like              |
| 165 | NM_005398 | PPP1R3C   | 19 | 8 | 0.0000005514 | Protein phosphatase 1, regulatory (inhibitor) subunit 3C                         |
| 166 | NM_007183 | PKP3      | 18 | 8 | 0.0000005571 | Plakophilin 3                                                                    |
| 167 | NM_019003 | SPIN2     | 18 | 7 | 0.0000005620 | Spindlin family, member 2                                                        |
| 168 | NM_005213 | CSTA      | 15 | 8 | 0.0000005722 | Cystatin A (stefin A)                                                            |
| 169 | NM_002639 | SERPINB5  | 17 | 8 | 0.0000005749 | Serine (or cysteine) proteinase inhibitor, clade B (ovalbumin), member 5         |
| 170 | AK027169  | RNF128    | 19 | 7 | 0.0000005818 | Ring finger protein 128                                                          |
| 171 | AB014607  | THEA      | 18 | 8 | 0.0000005911 | Thioesterase, adipose associated                                                 |
| 172 | NM_000110 | DPYD      | 14 | 8 | 0.0000005968 | Dihydropyrimidine dehydrogenase                                                  |
| 173 | NM_002717 | PPP2R2A   | 19 | 8 | 0.0000006027 | Protein phosphatase 2 (formerly 2A), regulatory subunit B (PR 52), alpha isoform |
| 174 | NM_003287 | TPD52L1   | 19 | 8 | 0.0000006058 | Tumor protein D52-like 1                                                         |
| 175 | NM_002313 | ABLIM1    | 19 | 8 | 0.0000006086 | Actin binding LIM protein 1                                                      |
| 176 | NM_005244 | EYA2      | 19 | 5 | 0.0000006107 | Eyes absent homolog 2 (Drosophila)                                               |
| 177 | NM_004881 | TP53I3    | 18 | 6 | 0.0000006110 | Tumor protein p53 inducible protein 3                                            |
| 178 | AB032957  | HECTD1    | 18 | 8 | 0.0000006206 | HECT domain containing 1                                                         |
| 179 | AB040968  | HCN3      | 18 | 6 | 0.0000006262 | Hyperpolarization activated cyclic nucleotide-gated potassium channel 3          |
| 180 | AF009324  |           | 19 | 8 | 0.0000006273 | Data not found                                                                   |
| 181 | NM_002864 | PZP       | 19 | 8 | 0.0000006496 | Pregnancy-zone protein                                                           |
| 182 | NM_016322 | RAB14     | 19 | 7 | 0.0000006525 | RAB14, member RAS oncogene family                                                |
| 183 | AK026922  | FLJ40432  | 18 | 8 | 0.0000006536 | Hypothetical protein FLJ40432                                                    |
| 184 | NM_004751 | GCNT3     | 19 | 6 | 0.0000006877 | Glucosaminyl (N-acetyl) transferase 3, mucin type                                |
| 185 | AF309489  | HAMP      | 19 | 8 | 0.0000007023 | Hepcidin antimicrobial peptide                                                   |
| 186 | AK002208  |           | 18 | 8 | 0.0000007125 | Nasopharyngeal carcinoma-associated antigen NPC-A-5                              |
| 187 | AK025588  |           | 18 | 8 | 0.0000007336 | Data not found                                                                   |
| 188 | NM_006829 | C10orf116 | 14 | 6 | 0.0000007561 | Chromosome 10 open reading frame 116                                             |
| 189 | NM_005135 | SLC12A6   | 17 | 6 | 0.0000007703 | Solute carrier family 12 (potassium/chloride transporters), member 6             |
| 190 | AL162069  | LOC144501 | 19 | 7 | 0.0000008063 | Hypothetical protein LOC144501                                                   |
| 191 | NM_002674 | PMCH      | 19 | 8 | 0.0000008372 | Pro-melanin-concentrating hormone                                                |
| 192 | NM_006145 | DNAJB1    | 19 | 8 | 0.0000008381 | DnaJ (Hsp40) homolog, subfamily B, member 1                                      |
| 193 | AK025378  | PDGFD     | 15 | 8 | 0.0000008633 | Platelet derived growth factor D                                                 |
| 194 | NM_003975 | SH2D2A    | 18 | 8 | 0.0000008791 | SH2 domain protein 2A                                                            |
| 195 | D38169    | ITPKC     | 19 | 8 | 0.0000009203 | Inositol 1,4,5-trisphosphate 3-kinase C                                          |
| 196 | NM_014688 |           | 19 | 8 | 0.0000009632 | Data not found                                                                   |

|     |           |          |    |   |              |                                                                       |
|-----|-----------|----------|----|---|--------------|-----------------------------------------------------------------------|
| 197 | NM_005369 | MCF2     | 19 | 8 | 0.0000010150 | MCF.2 cell line derived transforming sequence                         |
| 198 | NM_002663 | PLD2     | 15 | 6 | 0.0000010590 | Phospholipase D2                                                      |
| 199 | AK000184  | SMPDL3A  | 17 | 8 | 0.0000011205 | Sphingomyelin phosphodiesterase, acid-like 3A                         |
| 200 | AK026290  | ELL3     | 18 | 5 | 0.0000011392 | Elongation factor RNA polymerase II-like 3                            |
| 201 | NM_005232 | EPHA1    | 18 | 8 | 0.0000012721 | EPH receptor A1                                                       |
| 202 | NM_015717 | CD207    | 19 | 7 | 0.0000012766 | CD207 antigen, langerin                                               |
| 203 | NM_001537 | HSBP1    | 19 | 8 | 0.0000012787 | Heat shock factor binding protein 1                                   |
| 204 | NM_001740 | CALB2    | 19 | 8 | 0.0000013414 | Calbindin 2, 29kDa (calretinin)                                       |
| 205 | NM_014395 | DAPP1    | 14 | 7 | 0.0000015038 | Dual adaptor of phosphotyrosine and 3-phosphoinositides               |
| 206 | NM_014921 | LPHN1    | 16 | 7 | 0.0000015813 | Latrophilin 1                                                         |
| 207 | NM_002230 | JUP      | 19 | 8 | 0.0000016592 | Junction plakoglobin                                                  |
| 208 | AL117664  | ABI3BP   | 19 | 6 | 0.0000017155 | ABI gene family, member 3 (NESH) binding protein                      |
| 209 | NM_004694 | SLC16A6  | 19 | 8 | 0.0000017161 | Solute carrier family 16 (monocarboxylic acid transporters), member 6 |
| 210 | NM_005013 | NUCB2    | 19 | 8 | 0.0000017358 | Nucleobindin 2                                                        |
| 211 | NM_006831 | HEAB     | 18 | 8 | 0.0000017727 | ATP/GTP-binding protein                                               |
| 212 | NM_006018 | GPR109B  | 18 | 8 | 0.0000017790 | G protein-coupled receptor 109B                                       |
| 213 | X82693    | LY6D     | 17 | 8 | 0.0000018023 | Lymphocyte antigen 6 complex, locus D                                 |
| 214 | NM_001748 | CAPN2    | 19 | 8 | 0.0000018074 | Calpain 2, (m/II) large subunit                                       |
| 215 | NM_005797 | EVA1     | 17 | 7 | 0.0000018166 | Epithelial V-like antigen 1                                           |
| 216 | AK023397  | FYCO1    | 19 | 7 | 0.0000018279 | FYVE and coiled-coil domain containing 1                              |
| 217 | AK025571  | FLJ21918 | 19 | 8 | 0.0000018659 | Hypothetical protein FLJ21918                                         |
| 218 | NM_004415 | DSP      | 17 | 8 | 0.0000018777 | Desmoplakin                                                           |
| 219 | NM_014590 |          | 16 | 6 | 0.0000018903 | Data not found                                                        |
| 220 | NM_006769 | LMO4     | 18 | 6 | 0.0000019149 | LIM domain only 4                                                     |
| 221 | NM_005767 | P2RY5    | 18 | 8 | 0.0000019554 | Purinergic receptor P2Y, G-protein coupled, 5                         |
| 222 | U03886    | PNPLA4   | 16 | 8 | 0.0000019734 | Patatin-like phospholipase domain containing 4                        |
| 223 | NM_007125 | UTY      | 16 | 8 | 0.0000020259 | Ubiquitously transcribed tetratricopeptide repeat gene, Y-linked      |
| 224 | NM_012383 | OSTF1    | 17 | 6 | 0.0000020411 | Osteoclast stimulating factor 1                                       |
| 225 | AF086244  | KCNRG    | 19 | 5 | 0.0000020751 | Potassium channel regulator                                           |
| 226 | NM_002451 | MTAP     | 19 | 8 | 0.0000021844 | Methylthioadenosine phosphorylase                                     |
| 227 | AK026959  | FOSL2    | 17 | 8 | 0.0000021868 | FOS-like antigen 2                                                    |
| 228 | AF007194  | MUC3B    | 19 | 8 | 0.0000022577 | Mucin 3A, intestinal                                                  |
| 229 | AL133105  | FAM20A   | 19 | 7 | 0.0000022602 | Family with sequence similarity 20, member A                          |

|     |           |          |    |   |              |                                                                                |
|-----|-----------|----------|----|---|--------------|--------------------------------------------------------------------------------|
| 230 | NM_006025 | P11      | 11 | 7 | 0.0000022644 | 26 serine protease                                                             |
| 231 | NM_004663 | RAB11A   | 19 | 7 | 0.0000022758 | RAB11A, member RAS oncogene family                                             |
| 232 | AK024577  | KBTBD2   | 17 | 7 | 0.0000023483 | Kelch repeat and BTB (POZ) domain containing 2                                 |
| 233 | NM_005511 | MLANA    | 19 | 8 | 0.0000023618 | Melan-A                                                                        |
| 234 | NM_016519 | AMBN     | 19 | 8 | 0.0000024290 | Ameloblastin, enamel matrix protein                                            |
| 235 | NM_004173 | SLC7A4   | 19 | 7 | 0.0000024489 | Solute carrier family 7 (cationic amino acid transporter, y+ system), member 4 |
| 236 | AB038318  | C19orf33 | 16 | 7 | 0.0000025380 | Hypothetical LOC541469 protein                                                 |
| 237 | D87458    | TRIM9    | 18 | 8 | 0.0000026646 | Tripartite motif-containing 9                                                  |
| 238 | AB011132  | AQR      | 19 | 8 | 0.0000026674 | Aquarius homolog (mouse)                                                       |
| 239 | NM_003581 | NCK2     | 18 | 7 | 0.0000026867 | NCK adaptor protein 2                                                          |
| 240 | AK026352  | STARD5   | 15 | 7 | 0.0000027707 | START domain containing 5                                                      |
| 241 | NM_001885 | CRYAB    | 14 | 7 | 0.0000028899 | Crystallin, alpha B                                                            |
| 242 | NM_018702 | ADARB2   | 18 | 8 | 0.0000029088 | Adenosine deaminase, RNA-specific, B2 (RED2 homolog rat)                       |
| 243 | AK026517  | EHF      | 13 | 7 | 0.0000029241 | Ets homologous factor                                                          |
| 244 | NM_003385 | VSNL1    | 16 | 7 | 0.0000030156 | Visinin-like 1                                                                 |
| 245 | NM_014438 | IL1F8    | 18 | 8 | 0.0000030901 | Interleukin 1 family, member 8 (eta)                                           |
| 246 | NM_004554 | NFATC4   | 19 | 8 | 0.0000031284 | Nuclear factor of activated T-cells, cytoplasmic, calcineurin-dependent 4      |
| 247 | NM_005402 | RALA     | 19 | 8 | 0.0000031323 | V-ral simian leukemia viral oncogene homolog A (ras related)                   |
| 248 | NM_005178 | BCL3     | 19 | 8 | 0.0000031544 | B-cell CLL/lymphoma 3                                                          |
| 249 | NM_002223 | ITPR2    | 19 | 8 | 0.0000031943 | Inositol 1,4,5-triphosphate receptor, type 2                                   |
| 250 | NM_003126 | SPTA1    | 19 | 8 | 0.0000031988 | Spectrin, alpha, erythrocytic 1 (elliptocytosis 2)                             |
| 251 | NM_016151 | TAOK2    | 19 | 8 | 0.0000032523 | TAO kinase 2                                                                   |
| 252 | AB014566  | DAAM1    | 18 | 7 | 0.0000033288 | Dishevelled associated activator of morphogenesis 1                            |
| 253 | NM_001424 | EMP2     | 19 | 8 | 0.0000033303 | Epithelial membrane protein 2                                                  |
| 254 | NM_018339 | RFK      | 19 | 8 | 0.0000034163 | Riboflavin kinase                                                              |
| 255 | NM_000714 | BZRP     | 19 | 8 | 0.0000034241 | Benzodiazapine receptor (peripheral)                                           |
| 256 | NM_001305 | CLDN4    | 19 | 8 | 0.0000034642 | Claudin 4                                                                      |
| 257 | AK027167  | FLJ23514 | 19 | 8 | 0.0000035609 | Hypothetical protein FLJ23514                                                  |
| 258 | NM_002275 | KRT15    | 16 | 8 | 0.0000035694 | Keratin 15                                                                     |
| 259 | NM_014675 | CROCC    | 16 | 7 | 0.0000037036 | Ciliary rootlet coiled-coil, rootletin                                         |
| 260 | AJ000096  | CBR3     | 14 | 5 | 0.0000037650 | Carbonyl reductase 3                                                           |
| 261 | AF235022  | RAB38    | 17 | 7 | 0.0000038253 | RAB38, member RAS oncogene family                                              |
| 262 | NM_003715 | VDP      | 19 | 8 | 0.0000038392 | Vesicle docking protein p115                                                   |



|     |           |           |    |   |              |                                                                                                |
|-----|-----------|-----------|----|---|--------------|------------------------------------------------------------------------------------------------|
| 263 | NM_004817 | TJP2      | 19 | 8 | 0.0000038481 | Tight junction protein 2 (zona occludens 2)                                                    |
| 264 | NM_000325 | PITX2     | 19 | 7 | 0.0000039076 | Paired-like homeodomain transcription factor 2                                                 |
| 265 | AK023607  | SASH1     | 15 | 8 | 0.0000039469 | SAM and SH3 domain containing 1                                                                |
| 266 | AK023979  | C14orf46  | 17 | 8 | 0.0000039639 | Chromosome 14 open reading frame 46                                                            |
| 267 | NM_018964 | SLC37A1   | 16 | 6 | 0.0000039770 | Solute carrier family 37 (glycerol-3-phosphate transporter), member 1                          |
| 268 | NM_001072 | UGT1A6    | 19 | 8 | 0.0000041108 | UDP glucuronosyltransferase 1 family, polypeptide A9                                           |
| 269 | AF236158  | C3orf14   | 17 | 7 | 0.0000041627 | Chromosome 3 open reading frame 14                                                             |
| 270 | NM_001115 | ADCY8     | 18 | 7 | 0.0000043047 | Adenylate cyclase 8 (brain)                                                                    |
| 271 | NM_000229 | LCAT      | 15 | 8 | 0.0000043427 | Lecithin-cholesterol acyltransferase                                                           |
| 272 | AL359650  |           | 18 | 7 | 0.0000043488 | Data not found                                                                                 |
| 273 | AL137736  | ARHGEF19  | 16 | 7 | 0.0000044133 | Rho guanine nucleotide exchange factor (GEF) 19                                                |
| 274 | NM_006888 | CALM1     | 19 | 8 | 0.0000044283 | Calmodulin 1 (phosphorylase kinase, delta)                                                     |
| 275 | NM_002705 | PPL       | 19 | 6 | 0.0000045892 | Periplakin                                                                                     |
| 276 | NM_000183 | HADHB     | 19 | 8 | 0.0000047301 | Hydroxyacyl-Coenzyme A dehydrogenase/3-ketoacyl-Coenzyme A thiolase/enoyl-Coenzyme A hydratase |
| 277 | NM_003273 | TM7SF2    | 18 | 8 | 0.0000047386 | Transmembrane 7 superfamily member 2                                                           |
| 278 | NM_016472 | C14orf129 | 16 | 6 | 0.0000047940 | Chromosome 14 open reading frame 129                                                           |
| 279 | NM_003236 | TGFA      | 15 | 7 | 0.0000049698 | Transforming growth factor, alpha                                                              |
| 280 | AL049302  | MARK1     | 18 | 5 | 0.0000050082 | MAP/microtubule affinity-regulating kinase 1                                                   |
| 281 | NM_014063 | DBNL      | 19 | 8 | 0.0000050615 | Drebrin-like                                                                                   |
| 282 | X56807    | DSC2      | 18 | 8 | 0.0000051210 | Desmocollin 2                                                                                  |
| 283 | AL137763  | TFCP2L4   | 17 | 8 | 0.0000051314 | Grainyhead-like 3 (Drosophila)                                                                 |
| 284 | NM_007033 | RER1      | 19 | 8 | 0.0000053870 | RER1 retention in endoplasmic reticulum 1 homolog ( <i>S. cerevisiae</i> )                     |
| 285 | NM_002456 | MUC1      | 18 | 7 | 0.0000055372 | Mucin 1, transmembrane                                                                         |
| 286 | NM_000196 | HSD11B2   | 19 | 8 | 0.0000055670 | Hydroxysteroid (11-beta) dehydrogenase 2                                                       |
| 287 | NM_000667 | ADH1A     | 19 | 8 | 0.0000056003 | Alcohol dehydrogenase 1A (class I), alpha polypeptide                                          |
| 288 | AK024423  | FLJ00012  | 14 | 7 | 0.0000057883 | FLJ00012 protein                                                                               |
| 289 | NM_014119 |           | 12 | 5 | 0.0000059984 | Data not found                                                                                 |
| 290 | NM_016848 | SHC3      | 18 | 8 | 0.0000060521 | SHC (Src homology 2 domain containing) transforming protein 3                                  |
| 291 | M60499    | FLG       | 13 | 6 | 0.0000062763 | Filaggrin                                                                                      |
| 292 | NM_007318 | PSEN1     | 19 | 8 | 0.0000062825 | Presenilin 1 (Alzheimer disease 3)                                                             |
| 293 | NM_014256 | B3GNT3    | 16 | 8 | 0.0000062991 | UDP-GlcNAc:betaGal beta-1,3-N-acetylglucosaminyltransferase 3                                  |
| 294 | NM_006496 | GNAI3     | 18 | 8 | 0.0000063534 | Guanine nucleotide binding protein (G protein), alpha inhibiting activity polypeptide 3        |
| 295 | NM_019619 | PARD3     | 19 | 8 | 0.0000065728 | Par-3 partitioning defective 3 homolog ( <i>C. elegans</i> )                                   |

|     |           |          |    |   |              |                                                                         |
|-----|-----------|----------|----|---|--------------|-------------------------------------------------------------------------|
| 296 | NM_012455 | PSD4     | 19 | 8 | 0.0000065936 | Pleckstrin and Sec7 domain containing 4                                 |
| 297 | NM_014600 | EHD3     | 18 | 8 | 0.0000066751 | EH-domain containing 3                                                  |
| 298 | NM_014666 | ENTH     | 19 | 8 | 0.0000069491 | Enthoprotin                                                             |
| 299 | NM_014721 | PHACTR2  | 17 | 8 | 0.0000070084 | Phosphatase and actin regulator 2                                       |
| 300 | NM_005799 | INADL    | 19 | 8 | 0.0000070936 | InaD-like (Drosophila)                                                  |
| 301 | AL122083  | FLJ32926 | 18 | 8 | 0.0000071165 | Hypothetical protein FLJ32926                                           |
| 302 | NM_007030 | TPPP     | 15 | 7 | 0.0000071257 | Brain-specific protein p25 alpha                                        |
| 303 | AK001011  |          | 13 | 6 | 0.0000073861 | CDNA FLJ10149 fis, clone HEMBA1003380                                   |
| 304 | NM_016462 | TMEM14C  | 15 | 7 | 0.0000074237 | Transmembrane protein 14C                                               |
| 305 | AK025078  | SLC26A2  | 12 | 8 | 0.0000078940 | Solute carrier family 26 (sulfate transporter), member 2                |
| 306 | NM_000019 | ACAT1    | 19 | 8 | 0.0000080770 | Acetyl-Coenzyme A acetyltransferase 1 (acetoacetyl Coenzyme A thiolase) |
| 307 | NM_005134 | PPP4R1   | 17 | 6 | 0.0000081955 | Protein phosphatase 4, regulatory subunit 1                             |
| 308 | NM_014910 | ZNF507   | 19 | 8 | 0.0000083745 | Zinc finger protein 507                                                 |
| 309 | NM_015922 | NSDHL    | 19 | 7 | 0.0000083759 | NAD(P) dependent steroid dehydrogenase-like                             |
| 310 | AF311312  | SPAG1    | 14 | 8 | 0.0000085161 | Sperm associated antigen 1                                              |
| 311 | NM_017434 | DUOX1    | 18 | 7 | 0.0000088442 | Dual oxidase 1                                                          |
| 312 | NM_018326 | GIMAP4   | 19 | 7 | 0.0000089030 | GTPase, IMAP family member 4                                            |
| 313 | NM_001995 | ACSL1    | 19 | 8 | 0.0000089313 | Acyl-CoA synthetase long-chain family member 1                          |
| 314 | AB020637  | KIAA0830 | 18 | 8 | 0.0000089738 | KIAA0830 protein                                                        |
| 315 | NM_003909 | CPNE3    | 19 | 8 | 0.0000091961 | Copine III                                                              |
| 316 | NM_002194 | INPP1    | 17 | 7 | 0.0000092479 | Inositol polyphosphate-1-phosphatase                                    |
| 317 | U01147    | ABR      | 13 | 8 | 0.0000092689 | Active BCR-related gene                                                 |
| 318 | AB037832  | KIAA1411 | 19 | 8 | 0.0000095718 | KIAA1411                                                                |
| 319 | NM_020184 | CNNM4    | 19 | 8 | 0.0000096568 | Cyclin M4                                                               |
| 320 | NM_001806 | CEBPG    | 19 | 8 | 0.0000097909 | CCAAT/enhancer binding protein (C/EBP), gamma                           |
| 321 | NM_012190 | FTHFD    | 18 | 8 | 0.0000098877 | Aldehyde dehydrogenase 1 family, member L1                              |
| 322 | AB035130  | CYP4F12  | 18 | 8 | 0.0000099789 | Cytochrome P450, family 4, subfamily F, polypeptide 12                  |
| 323 | AL390079  | LOC58489 | 19 | 8 | 0.0000100606 | Hypothetical protein from EUROIMAGE 588495                              |
| 324 | AF086164  |          | 15 | 6 | 0.0000100851 | CDNA: FLJ21531 fis, clone COL06036                                      |
| 325 | NM_004675 | ARHI     | 17 | 5 | 0.0000100877 | DIRAS family, GTP-binding RAS-like 3                                    |
| 326 | NM_012101 | TRIM29   | 19 | 8 | 0.0000101029 | Tripartite motif-containing 29                                          |
| 327 | NM_004262 | HAT      | 15 | 6 | 0.0000102075 | Transmembrane protease, serine 11D                                      |
| 328 | NM_020168 | PAK6     | 19 | 8 | 0.0000102656 | P21(CDKN1A)-activated kinase 6                                          |

|     |           |           |    |   |              |                                                                            |
|-----|-----------|-----------|----|---|--------------|----------------------------------------------------------------------------|
| 329 | AK026315  | FLJ22662  | 16 | 7 | 0.0000102705 | Hypothetical protein FLJ22662                                              |
| 330 | AL137430  | LOC283070 | 10 | 6 | 0.0000103649 | Hypothetical protein LOC283070                                             |
| 331 | NM_000274 | OAT       | 19 | 8 | 0.0000108012 | Ornithine aminotransferase (gyrate atrophy)                                |
| 332 | NM_018050 | MANSC1    | 18 | 5 | 0.0000109523 | MANSC domain containing 1                                                  |
| 333 | AK026844  | FLJ23191  | 19 | 5 | 0.0000109611 | Hypothetical protein FLJ23191                                              |
| 334 | X60188    | MAPK3     | 19 | 8 | 0.0000109897 | Mitogen-activated protein kinase 3                                         |
| 335 | AL050102  | C10orf137 | 17 | 7 | 0.0000110917 | Chromosome 10 open reading frame 137                                       |
| 336 | NM_003643 | GCM1      | 14 | 7 | 0.0000112211 | Glial cells missing homolog 1 (Drosophila)                                 |
| 337 | NM_006654 | FRS2      | 17 | 7 | 0.0000112510 | Fibroblast growth factor receptor substrate 2                              |
| 338 | AK023131  | XPR1      | 17 | 7 | 0.0000113063 | Xenotropic and polytropic retrovirus receptor                              |
| 339 | NM_014359 | OPTC      | 18 | 6 | 0.0000113860 | Opticin                                                                    |
| 340 | AF147374  | ELAVL2    | 17 | 8 | 0.0000115982 | ELAV (embryonic lethal, abnormal vision, Drosophila)-like 2 (Hu antigen B) |
| 341 | NM_018422 |           | 18 | 6 | 0.0000118414 | Data not found                                                             |
| 342 | D50926    | ZCWCC3    | 19 | 8 | 0.0000118426 | MORC family CW-type zinc finger 3                                          |
| 343 | NM_013314 | BLNK      | 18 | 7 | 0.0000119496 | B-cell linker                                                              |
| 344 | NM_002587 | PCDH1     | 17 | 8 | 0.0000121968 | Protocadherin 1 (cadherin-like 1)                                          |
| 345 | NM_004669 | CLIC3     | 16 | 7 | 0.0000122468 | Chloride intracellular channel 3                                           |
| 346 | NM_002829 | PTPN3     | 18 | 8 | 0.0000124761 | Protein tyrosine phosphatase, non-receptor type 3                          |
| 347 | AF119911  |           | 11 | 8 | 0.0000124992 | Data not found                                                             |
| 348 | NM_006457 | PDLIM5    | 18 | 8 | 0.0000127303 | PDZ and LIM domain 5                                                       |
| 349 | AY007125  | UNC93B1   | 19 | 8 | 0.0000127410 | Unc-93 homolog B1 (C. elegans)                                             |
| 350 | NM_016129 | COPS4     | 19 | 8 | 0.0000127715 | COP9 constitutive photomorphogenic homolog subunit 4 (Arabidopsis)         |
| 351 | NM_001699 | AXL       | 19 | 8 | 0.0000130965 | AXL receptor tyrosine kinase                                               |
| 352 | NM_003025 | SH3GL1    | 19 | 8 | 0.0000131304 | SH3-domain GRB2-like 1                                                     |
| 353 | NM_005025 | SERPINI1  | 16 | 7 | 0.0000131529 | Serine (or cysteine) proteinase inhibitor, clade I (neuroserpin), member 1 |
| 354 | X64975    | OR7D2     | 16 | 7 | 0.0000132036 | Olfactory receptor, family 7, subfamily D, member 2                        |
| 355 | AK025703  | LOC401152 | 18 | 8 | 0.0000132430 | HCV F-transactivated protein 1                                             |
| 356 | AF159092  | NDRG2     | 18 | 8 | 0.0000134070 | NDRG family member 2                                                       |
| 357 | NM_001557 | IL8RB     | 14 | 6 | 0.0000135947 | Interleukin 8 receptor, beta                                               |
| 358 | AK026790  | MUC15     | 14 | 6 | 0.0000138680 | Mucin 15                                                                   |
| 359 | AL133632  |           | 19 | 8 | 0.0000144024 | Similar to hypothetical protein                                            |
| 360 | NM_005975 | PTK6      | 14 | 8 | 0.0000144058 | PTK6 protein tyrosine kinase 6                                             |
| 361 | M73792    | ZRANB3    | 17 | 6 | 0.0000146237 | RAB3 GTPase-activating protein                                             |

|     |           |           |    |   |              |                                                                        |
|-----|-----------|-----------|----|---|--------------|------------------------------------------------------------------------|
| 362 | NM_002754 | MAPK13    | 13 | 7 | 0.0000147261 | Mitogen-activated protein kinase 13                                    |
| 363 | AL133654  | KIF27     | 19 | 8 | 0.0000147672 | Kinesin family member 27                                               |
| 364 | NM_006283 | TACC1     | 19 | 8 | 0.0000147913 | Transforming, acidic coiled-coil containing protein 1                  |
| 365 | NM_003942 | RPS6KA4   | 19 | 8 | 0.0000149547 | Ribosomal protein S6 kinase, 90kDa, polypeptide 4                      |
| 366 | NM_006243 | PPP2R5A   | 19 | 8 | 0.0000153990 | Protein phosphatase 2, regulatory subunit B (B56), alpha isoform       |
| 367 | AF279265  | SLC26A6   | 18 | 8 | 0.0000159838 | Solute carrier family 26, member 6                                     |
| 368 | NM_004417 | DUSP1     | 19 | 8 | 0.0000161204 | Dual specificity phosphatase 1                                         |
| 369 | NM_003359 | UGDH      | 19 | 8 | 0.0000163571 | UDP-glucose dehydrogenase                                              |
| 370 | AK023759  | CSRP2BP   | 18 | 8 | 0.0000163803 | CSRP2 binding protein                                                  |
| 371 | NM_001500 | GMDS      | 19 | 8 | 0.0000164298 | GDP-mannose 4,6-dehydratase                                            |
| 372 | NM_002413 | MGST2     | 17 | 8 | 0.0000164708 | Microsomal glutathione S-transferase 2                                 |
| 373 | NM_000693 | ALDH1A3   | 19 | 7 | 0.0000169470 | Aldehyde dehydrogenase 1 family, member A3                             |
| 374 | NM_005079 | TPD52     | 19 | 8 | 0.0000169613 | Tumor protein D52                                                      |
| 375 | NM_000696 | ALDH9A1   | 19 | 8 | 0.0000169760 | Aldehyde dehydrogenase 9 family, member A1                             |
| 376 | L19369    |           | 15 | 5 | 0.0000174524 |                                                                        |
| 377 | NM_005258 | GCHFR     | 19 | 8 | 0.0000179480 | GTP cyclohydrolase I feedback regulator                                |
| 378 | AB018257  | ZNF294    | 17 | 8 | 0.0000180766 | Zinc finger protein 294                                                |
| 379 | AK022975  | LOC283874 | 18 | 8 | 0.0000181187 | Hypothetical protein LOC283874                                         |
| 380 | NM_004845 | PCYT1B    | 18 | 7 | 0.0000181733 | Phosphate cytidylyltransferase 1, choline, beta isoform                |
| 381 | NM_005190 | CCNC      | 14 | 7 | 0.0000182477 | Cyclin C                                                               |
| 382 | AK000039  | FLJ20032  | 19 | 8 | 0.0000182946 | Hypothetical protein FLJ20032                                          |
| 383 | NM_005235 | ERBB4     | 17 | 5 | 0.0000183297 | V-erb-a erythroblastic leukemia viral oncogene homolog 4 (avian)       |
| 384 | AB033118  | ZDHHC8    | 19 | 8 | 0.0000185821 | Zinc finger, DHHC-type containing 8                                    |
| 385 | AF218014  | C8orf20   | 19 | 8 | 0.0000189373 | Chromosome 8 open reading frame 20                                     |
| 386 | Z36819    |           | 16 | 8 | 0.0000189673 | Data not found                                                         |
| 387 | NM_000809 | GABRA4    | 15 | 7 | 0.0000190715 | Gamma-aminobutyric acid (GABA) A receptor, alpha 4                     |
| 388 | NM_005130 | FGFBP1    | 16 | 7 | 0.0000193325 | Fibroblast growth factor binding protein 1                             |
| 389 | NM_007052 | NOX1      | 19 | 8 | 0.0000194886 | NADPH oxidase 1                                                        |
| 390 | NM_006116 | MAP3K7IP1 | 18 | 6 | 0.0000196216 | Mitogen-activated protein kinase kinase kinase 7 interacting protein 1 |
| 391 | AK000216  | FLJ20209  | 16 | 7 | 0.0000196817 | Hypothetical protein FLJ20209                                          |
| 392 | NM_004315 | ASAHI     | 14 | 8 | 0.0000200570 | N-acylsphingosine amidohydrolase (acid ceramidase) 1                   |
| 393 | AK026141  | MGC39325  | 18 | 8 | 0.0000203649 | Hypothetical protein MGC39325                                          |
| 394 | AL137597  | TP53INP2  | 19 | 8 | 0.0000206972 | Tumor protein p53 inducible nuclear protein 2                          |

|     |           |               |    |   |              |                                                                           |
|-----|-----------|---------------|----|---|--------------|---------------------------------------------------------------------------|
| 395 | NM_002068 | GNA15         | 18 | 8 | 0.0000207606 | Guanine nucleotide binding protein (G protein), alpha 15 (Gq class)       |
| 396 | NM_019598 | KLK12         | 17 | 6 | 0.0000207808 | Kallikrein 12                                                             |
| 397 | AF131776  | CAMK2B        | 19 | 8 | 0.0000213922 | Calcium/calmodulin-dependent protein kinase (CaM kinase) II beta          |
| 398 | M82882    | ELF1          | 18 | 8 | 0.0000215982 | E74-like factor 1 (ets domain transcription factor)                       |
| 399 | L09098    |               | 19 | 7 | 0.0000216464 | Cell-type T-cell immunoglobulin gamma-chain, V region (IGHV@)             |
| 400 | NM_000380 | XPA           | 19 | 8 | 0.0000221709 | Xeroderma pigmentosum, complementation group A                            |
| 401 | NM_014051 | TMEM14A       | 16 | 7 | 0.0000223228 | Transmembrane protein 14A                                                 |
| 402 | NM_016422 | RNF141        | 19 | 8 | 0.0000224608 | Ring finger protein 141                                                   |
| 403 | AL050217  | DHRS1         | 19 | 8 | 0.0000226836 | Dehydrogenase/reductase (SDR family) member 1                             |
| 404 | AK021608  | FLJ22405      | 19 | 7 | 0.0000229756 | Hypothetical protein FLJ22405                                             |
| 405 | NM_001141 | ALOX15B       | 19 | 7 | 0.0000231780 | Arachidonate 15-lipoxygenase, second type                                 |
| 406 | AK023221  | SMAP1         | 19 | 8 | 0.0000236851 | Stromal membrane-associated protein 1                                     |
| 407 | AK026337  | GPR110        | 14 | 5 | 0.0000238013 | G protein-coupled receptor 110                                            |
| 408 | NM_012076 | CRB1          | 19 | 8 | 0.0000246969 | Crumbs homolog 1 (Drosophila)                                             |
| 409 | AF085892  |               | 17 | 8 | 0.0000247965 | Full length insert cDNA clone YP93A03                                     |
| 410 | NM_015959 | TMX2          | 17 | 8 | 0.0000249406 | Thioredoxin-related transmembrane protein 2                               |
| 411 | NM_012131 | CLDN17        | 18 | 7 | 0.0000256420 | Claudin 17                                                                |
| 412 | AF086541  |               | 13 | 6 | 0.0000266493 | Similar to death-associated protein                                       |
| 413 | NM_018163 | FLJ10634      | 18 | 8 | 0.0000267669 | DnaJ (Hsp40) homolog, subfamily C, member 17                              |
| 414 | AK022836  | ALS2CR4       | 19 | 8 | 0.0000269058 | Amyotrophic lateral sclerosis 2 (juvenile) chromosome region, candidate 4 |
| 415 | NM_016511 | CLEC1         | 18 | 6 | 0.0000269627 | C-type lectin domain family 1, member A                                   |
| 416 | AB032991  | NDFIP2        | 19 | 8 | 0.0000274859 | Nedd4 family interacting protein 2                                        |
| 417 | NM_001663 | ARF6          | 19 | 8 | 0.0000277326 | ADP-ribosylation factor 6                                                 |
| 418 | NM_002039 | GAB1          | 18 | 8 | 0.0000280408 | GRB2-associated binding protein 1                                         |
| 419 | AF090405  |               | 18 | 8 | 0.0000282676 | Data not found                                                            |
| 420 | AF132733  | DKFZP564G2022 | 19 | 8 | 0.0000282771 | DKFZP564G2022 protein                                                     |
| 421 | AF160477  | PVRL4         | 19 | 8 | 0.0000286467 | Poliovirus receptor-related 4                                             |
| 422 | AK023707  | CCDC2         | 19 | 8 | 0.0000289085 | Coiled-coil domain containing 2                                           |
| 423 | NM_004807 | HS6ST1        | 18 | 8 | 0.0000290672 | Heparan sulfate 6-O-sulfotransferase 1                                    |
| 424 | AK000208  | MGC50844      | 15 | 7 | 0.0000294835 | Hypothetical protein MGC50844                                             |
| 425 | D79994    | ANKRD15       | 19 | 6 | 0.0000298998 | Ankyrin repeat domain 15                                                  |
| 426 | NM_001928 | DF            | 18 | 8 | 0.0000301585 | D component of complement (adipsin)                                       |
| 427 | AK022564  | C14orf159     | 19 | 8 | 0.0000301747 | Chromosome 14 open reading frame 159                                      |

|     |           |          |    |   |              |                                                                                  |
|-----|-----------|----------|----|---|--------------|----------------------------------------------------------------------------------|
| 428 | NM_001712 | CEACAM1  | 19 | 7 | 0.0000303318 | Carcinoembryonic antigen-related cell adhesion molecule 1 (biliary glycoprotein) |
| 429 | NM_014421 | DKK2     | 16 | 7 | 0.0000304791 | Dickkopf homolog 2 ( <i>Xenopus laevis</i> )                                     |
| 430 | NM_018208 | ETNK2    | 16 | 8 | 0.0000307641 | Ethanolamine kinase 2                                                            |
| 431 | NM_003827 | NAPA     | 18 | 8 | 0.0000310645 | N-ethylmaleimide-sensitive factor attachment protein, alpha                      |
| 432 | AK025141  | CHPT1    | 13 | 6 | 0.0000312836 | Choline phosphotransferase 1                                                     |
| 433 | NM_014440 | IL1F6    | 14 | 6 | 0.0000314861 | Interleukin 1 family, member 6 (epsilon)                                         |
| 434 | NM_002979 | SCP2     | 19 | 8 | 0.0000315013 | Sterol carrier protein 2                                                         |
| 435 | NM_002114 | HIVEP1   | 18 | 7 | 0.0000316460 | Human immunodeficiency virus type I enhancer binding protein 1                   |
| 436 | NM_004869 | VPS4B    | 16 | 8 | 0.0000321468 | Vacuolar protein sorting 4B (yeast)                                              |
| 437 | AK023725  | NAPG     | 18 | 6 | 0.0000322267 | N-ethylmaleimide-sensitive factor attachment protein, gamma                      |
| 438 | AF086036  | PPP1R12B | 16 | 6 | 0.0000322342 | Protein phosphatase 1, regulatory (inhibitor) subunit 12B                        |
| 439 | NM_013385 | PSCD4    | 19 | 7 | 0.0000327536 | Pleckstrin homology, Sec7 and coiled-coil domains 4                              |
| 440 | AB011093  | ARHGEF18 | 19 | 8 | 0.0000331152 | Rho/rac guanine nucleotide exchange factor (GEF) 18                              |
| 441 | AL137555  | C9orf88  | 19 | 8 | 0.0000340910 | Chromosome 9 open reading frame 88                                               |
| 442 | AF169158  | CABP5    | 15 | 7 | 0.0000345335 | Calcium binding protein 5                                                        |
| 443 | NM_005719 | ARPC3    | 18 | 8 | 0.0000350133 | Actin related protein 2/3 complex, subunit 3, 21kDa                              |
| 444 | AB040914  | ShrmL    | 18 | 8 | 0.0000352985 | Shroom                                                                           |
| 445 | AB020676  | KIBRA    | 19 | 8 | 0.0000353195 | KIBRA protein                                                                    |
| 446 | NM_000676 | ADORA2B  | 16 | 8 | 0.0000359876 | Adenosine A2b receptor                                                           |
| 447 | NM_001903 | CTNNA1   | 19 | 8 | 0.0000365917 | Catenin (cadherin-associated protein), alpha 1, 102kDa                           |
| 448 | NM_004893 | H2AFY    | 19 | 8 | 0.0000375600 | H2A histone family, member Y                                                     |
| 449 | NM_016545 | IER5     | 18 | 8 | 0.0000383182 | Immediate early response 5                                                       |
| 450 | AL133641  | TOM1L2   | 18 | 8 | 0.0000383765 | Target of myb1-like 2 (chicken)                                                  |
| 451 | NM_003357 | SCGB1A1  | 14 | 5 | 0.0000389097 | Secretoglobin, family 1A, member 1 (uteroglobin)                                 |
| 452 | NM_000336 | SCNN1B   | 17 | 8 | 0.0000389657 | Sodium channel, nonvoltage-gated 1, beta (Liddle syndrome)                       |
| 453 | AK025036  | DUSP18   | 16 | 5 | 0.0000390339 | Dual specificity phosphatase 18                                                  |
| 454 | L37690    |          | 16 | 8 | 0.0000394611 | Data not found                                                                   |
| 455 | NM_018046 | AGGF1    | 18 | 7 | 0.0000395369 | Angiogenic factor with G patch and FHA domains 1                                 |
| 456 | AK025426  | HDAC11   | 18 | 7 | 0.0000397909 | Histone deacetylase 11                                                           |
| 457 | NM_019005 | FLJ20323 | 19 | 8 | 0.0000399469 | Hypothetical protein FLJ20323                                                    |
| 458 | AF035282  | C1orf21  | 17 | 7 | 0.0000400586 | Chromosome 1 open reading frame 21                                               |
| 459 | NM_000851 | GSTM5    | 17 | 7 | 0.0000408832 | Glutathione S-transferase M5                                                     |
| 460 | NM_005509 | DMXL1    | 18 | 7 | 0.0000410248 | Dmx-like 1                                                                       |

|     |           |          |    |   |              |                                                                                                  |
|-----|-----------|----------|----|---|--------------|--------------------------------------------------------------------------------------------------|
| 461 | NM_018173 | FLJ10665 | 17 | 7 | 0.0000411997 | Pleckstrin homology domain containing, family G (with RhoGef domain) member 6                    |
| 462 | AB007890  | LKAP     | 19 | 8 | 0.0000413784 | Limkain b1                                                                                       |
| 463 | Z97017    | GALNT13  | 14 | 6 | 0.0000419443 | UDP-N-acetyl-alpha-D-galactosamine:polypeptide N-acetylgalactosaminyltransferase 13 (GalNAc-T13) |
| 464 | NM_003833 | MATN4    | 13 | 5 | 0.0000423414 | Matrilin 4                                                                                       |
| 465 | NM_002631 | PGD      | 19 | 8 | 0.0000437503 | Phosphogluconate dehydrogenase                                                                   |
| 466 | AK023080  | SLC35F2  | 18 | 8 | 0.0000437713 | Solute carrier family 35, member F2                                                              |
| 467 | AF085939  | ATXN2    | 18 | 8 | 0.0000437849 | Ataxin 2                                                                                         |
| 468 | NM_001218 | CA12     | 19 | 8 | 0.0000440668 | Carbonic anhydrase XII                                                                           |
| 469 | NM_001979 | EPHX2    | 16 | 8 | 0.0000443998 | Epoxide hydrolase 2, cytoplasmic                                                                 |
| 470 | NM_004913 | C16orf7  | 19 | 7 | 0.0000445033 | Chromosome 16 open reading frame 7                                                               |
| 471 | L23401    |          | 17 | 8 | 0.0000448416 | Data not found                                                                                   |
| 472 | AB037775  | KLHL9    | 19 | 7 | 0.0000461455 | Kelch-like 9 (Drosophila)                                                                        |
| 473 | NM_001243 | TNFRSF8  | 17 | 8 | 0.0000463179 | Tumor necrosis factor receptor superfamily, member 8                                             |
| 474 | NM_017431 | PRKAG3   | 17 | 7 | 0.0000464228 | Protein kinase, AMP-activated, gamma 3 non-catalytic subunit                                     |
| 475 | M24749    |          | 19 | 8 | 0.0000465485 | Data not found                                                                                   |
| 476 | AF090942  | PPP3CA   | 16 | 8 | 0.0000467003 | Protein phosphatase 3 (formerly 2B), catalytic subunit, alpha isoform (calcineurin A alpha)      |
| 477 | M92642    | COL16A1  | 17 | 6 | 0.0000469496 | Collagen, type XVI, alpha 1                                                                      |
| 478 | AK026271  | NUP37    | 19 | 8 | 0.0000469747 | Nucleoporin 37kDa                                                                                |
| 479 | NM_005609 | PYGM     | 19 | 7 | 0.0000471852 | Phosphorylase, glycogen; muscle (McArdle syndrome, glycogen storage disease type V)              |
| 480 | NM_000060 | BTD      | 18 | 7 | 0.0000473821 | Biotinidase                                                                                      |
| 481 | NM_001230 | CASP10   | 18 | 6 | 0.0000478237 | Caspase 10, apoptosis-related cysteine protease                                                  |
| 482 | NM_018961 | UBASH3A  | 17 | 8 | 0.0000478851 | Ubiquitin associated and SH3 domain containing, A                                                |
| 483 | AJ011497  | CLDN7    | 18 | 8 | 0.0000482156 | Claudin 7                                                                                        |
| 484 | AK024071  | TLE6     | 16 | 8 | 0.0000501688 | Transducin-like enhancer of split 6 (E(sp1) homolog, Drosophila)                                 |
| 485 | NM_001444 | FABP5    | 19 | 8 | 0.0000502115 | Fatty acid binding protein 5 (psoriasis-associated)                                              |
| 486 | NM_005139 | ANXA3    | 19 | 6 | 0.0000519808 | Annexin A3                                                                                       |
| 487 | NM_003156 | STIM1    | 19 | 8 | 0.0000519821 | Stromal interaction molecule 1                                                                   |
| 488 | NM_005197 | CHES1    | 19 | 7 | 0.0000525328 | Checkpoint suppressor 1                                                                          |
| 489 | AK001007  |          | 19 | 8 | 0.0000542101 | CDNA FLJ10145 fis, clone HEMBA1003322                                                            |
| 490 | AK024967  | MLSTD2   | 18 | 8 | 0.0000545068 | Male sterility domain containing 2                                                               |
| 491 | NM_006691 | XLKD1    | 19 | 8 | 0.0000547507 | Extracellular link domain containing 1                                                           |
| 492 | AL390144  |          | 18 | 8 | 0.0000548621 | Data not found                                                                                   |
| 493 | D78514    | UBE2G1   | 19 | 8 | 0.0000558196 | Ubiquitin-conjugating enzyme E2G 1 (UBC7 homolog, C. elegans)                                    |

|     |           |          |    |   |              |                                                                            |
|-----|-----------|----------|----|---|--------------|----------------------------------------------------------------------------|
| 494 | Z46967    | CCIN     | 19 | 8 | 0.0000560928 | Calicin                                                                    |
| 495 | NM_000361 | THBD     | 14 | 7 | 0.0000561794 | Thrombomodulin                                                             |
| 496 | NM_019058 | DDIT4    | 17 | 5 | 0.0000565147 | DNA-damage-inducible transcript 4                                          |
| 497 | AK022812  | FLJ12750 | 18 | 8 | 0.0000570904 | Hypothetical protein FLJ12750                                              |
| 498 | NM_005218 | DEFB1    | 18 | 7 | 0.0000580080 | Defensin, beta 1                                                           |
| 499 | NM_020236 | MRPL1    | 19 | 7 | 0.0000581597 | Mitochondrial ribosomal protein L1                                         |
| 500 | NM_000150 | FUT6     | 19 | 8 | 0.0000584915 | Fucosyltransferase 6 (alpha (1,3) fucosyltransferase)                      |
| 501 | NM_000690 | ALDH2    | 18 | 7 | 0.0000586972 | Aldehyde dehydrogenase 2 family (mitochondrial)                            |
| 502 | NM_003732 | ANKHD1   | 19 | 8 | 0.0000591386 | Ankyrin repeat and KH domain containing 1                                  |
| 503 | NM_001088 | AANAT    | 18 | 8 | 0.0000592626 | Arylalkylamine N-acetyltransferase                                         |
| 504 | NM_013364 | PNMA3    | 19 | 8 | 0.0000596516 | Paraneoplastic antigen MA3                                                 |
| 505 | AJ000414  | TRIP10   | 19 | 8 | 0.0000599112 | Thyroid hormone receptor interactor 10                                     |
| 506 | AF272370  | MLL      | 19 | 8 | 0.0000603894 | Myeloid/lymphoid or mixed-lineage leukemia (trithorax homolog, Drosophila) |
| 507 | NM_000282 | PCCA     | 18 | 7 | 0.0000604798 | Propionyl Coenzyme A carboxylase, alpha polypeptide                        |
| 508 | NM_003338 | UBE2D1   | 13 | 7 | 0.0000605918 | Ubiquitin-conjugating enzyme E2D 1 (UBC4/5 homolog, yeast)                 |
| 509 | AF181994  | FANCF    | 18 | 8 | 0.0000611146 | Fanconi anemia, complementation group F                                    |
| 510 | AF043897  | C9orf3   | 19 | 7 | 0.0000611509 | Chromosome 9 open reading frame 3                                          |
| 511 | NM_005665 | EVI5     | 17 | 8 | 0.0000614547 | Ecotropic viral integration site 5                                         |
| 512 | D55639    | KYNU     | 13 | 6 | 0.0000615210 | Kynureninase (L-kynurenine hydrolase)                                      |
| 513 | NM_013937 | OR11A1   | 17 | 7 | 0.0000618216 | Olfactory receptor, family 11, subfamily A, member 1                       |
| 514 | NM_003018 | SFTPC    | 19 | 7 | 0.0000625128 | Surfactant, pulmonary-associated protein C                                 |
| 515 | AK025325  |          | 13 | 5 | 0.0000625817 | CDNA: FLJ21672 fis, clone COL09025                                         |
| 516 | NM_018306 | TMEM40   | 16 | 7 | 0.0000628093 | Transmembrane protein 40                                                   |
| 517 | AJ227871  | SFXN1    | 19 | 8 | 0.0000638016 | Sideroflexin 1                                                             |
| 518 | M65066    | PRKAR1B  | 18 | 8 | 0.0000639979 | Protein kinase, cAMP-dependent, regulatory, type I, beta                   |
| 519 | NM_004633 | IL1R2    | 15 | 8 | 0.0000645932 | Interleukin 1 receptor, type II                                            |
| 520 | NM_002033 | FUT4     | 19 | 8 | 0.0000658806 | Fucosyltransferase 4 (alpha (1,3) fucosyltransferase, myeloid-specific)    |
| 521 | NM_000428 | LTBP2    | 19 | 7 | 0.0000660887 | Latent transforming growth factor beta binding protein 2                   |
| 522 | NM_004703 | RABEP1   | 17 | 8 | 0.0000662841 | Rabaptin, RAB GTPase binding effector protein 1                            |
| 523 | AL050078  | PGAP1    | 18 | 7 | 0.0000670625 | GPI deacylase                                                              |
| 524 | NM_014830 | KIAA0352 | 19 | 8 | 0.0000672788 | Zinc finger and BTB domain containing 39                                   |
| 525 | NM_012331 | MSRA     | 17 | 7 | 0.0000683391 | Methionine sulfoxide reductase A                                           |
| 526 | NM_017702 | FLJ20186 | 19 | 8 | 0.0000686892 | Hypothetical protein FLJ20186                                              |



|     |           |           |    |   |              |                                                                                                     |
|-----|-----------|-----------|----|---|--------------|-----------------------------------------------------------------------------------------------------|
| 527 | NM_002457 | MUC2      | 15 | 5 | 0.0000690004 | Mucin 2, intestinal/tracheal                                                                        |
| 528 | NM_003568 | ANXA9     | 19 | 7 | 0.0000690080 | Annexin A9                                                                                          |
| 529 | AK025374  | MGC61716  | 17 | 5 | 0.0000693732 | MTERF domain containing 2                                                                           |
| 530 | NM_003069 | SMARCA1   | 19 | 8 | 0.0000698129 | SWI/SNF related, matrix associated, actin dependent regulator of chromatin, subfamily a, member 1   |
| 531 | NM_007034 | DNAJB4    | 18 | 8 | 0.0000698369 | DnaJ (Hsp40) homolog, subfamily B, member 4                                                         |
| 532 | D17200    | FLJ23861  | 18 | 8 | 0.0000699083 | Hypothetical protein FLJ23861                                                                       |
| 533 | NM_004839 | HOMER2    | 14 | 7 | 0.0000700412 | Homer homolog 2 (Drosophila)                                                                        |
| 534 | NM_003689 | AKR7A2    | 19 | 8 | 0.0000701617 | Aldo-keto reductase family 7, member A2 (aflatoxin aldehyde reductase)                              |
| 535 | AK023938  | LRRFIP1   | 16 | 6 | 0.0000702203 | Leucine rich repeat (in FLII) interacting protein 1                                                 |
| 536 | NM_005416 | SPRR3     | 19 | 7 | 0.0000708311 | Small proline-rich protein 3                                                                        |
| 537 | NM_018268 | WDR41     | 19 | 8 | 0.0000709248 | WD repeat domain 41                                                                                 |
| 538 | NM_006019 | TCIRG1    | 18 | 7 | 0.0000709261 | T-cell, immune regulator 1, ATPase, H+ transporting, lysosomal V0 protein a isoform 3               |
| 539 | AF105378  | HS3ST4    | 19 | 8 | 0.0000716090 | Heparan sulfate (glucosamine) 3-O-sulfotransferase 4                                                |
| 540 | NM_016270 | KLF2      | 18 | 8 | 0.0000722981 | Kruppel-like factor 2 (lung)                                                                        |
| 541 | AK026168  |           | 16 | 8 | 0.0000727091 | Hypothetical LOC401255                                                                              |
| 542 | U90878    | PDLIM1    | 19 | 8 | 0.0000732216 | PDZ and LIM domain 1 (elfin)                                                                        |
| 543 | AB011112  | KIAA0540  | 18 | 8 | 0.0000732941 | Neurobeachin-like 2                                                                                 |
| 544 | NM_001945 | HBEGF     | 16 | 6 | 0.0000735616 | Heparin-binding EGF-like growth factor                                                              |
| 545 | NM_001482 | GATM      | 14 | 8 | 0.0000745951 | Glycine amidinotransferase (L-arginine:glycine amidinotransferase)                                  |
| 546 | AK022680  | C14orf160 | 18 | 6 | 0.0000756961 | L-2-hydroxyglutarate dehydrogenase                                                                  |
| 547 | NM_004157 | PRKAR2A   | 19 | 8 | 0.0000760931 | Protein kinase, cAMP-dependent, regulatory, type II, alpha                                          |
| 548 | NM_004999 | MYO6      | 19 | 8 | 0.0000761642 | Myosin VI                                                                                           |
| 549 | NM_001127 | AP1B1     | 19 | 8 | 0.0000768569 | Adaptor-related protein complex 1, beta 1 subunit                                                   |
| 550 | NM_016013 | NDUFAF1   | 17 | 8 | 0.0000775346 | NADH dehydrogenase (ubiquinone) 1 alpha subcomplex, assembly factor 1                               |
| 551 | NM_014456 | PDCD4     | 19 | 8 | 0.0000782465 | Programmed cell death 4 (neoplastic transformation inhibitor)                                       |
| 552 | AL137761  |           | 16 | 7 | 0.0000782996 | Full-length cDNA clone CS0DJ001YJ05 of T cells (Jurkat cell line) Cot 10-normalized of Homo sapiens |
| 553 | NM_006192 | PAX1      | 19 | 5 | 0.0000783789 | Paired box gene 1                                                                                   |
| 554 | M62896    | ANXA2P1   | 19 | 8 | 0.0000785708 | Annexin A2 pseudogene 1                                                                             |
| 555 | AK025495  | SASH1     | 17 | 6 | 0.0000787929 | SAM and SH3 domain containing 1                                                                     |
| 556 | AB037726  | KIAA1305  | 19 | 8 | 0.0000789533 | KIAA1305                                                                                            |
| 557 | NM_012081 | ELL2      | 13 | 7 | 0.0000797966 | Elongation factor, RNA polymerase II, 2                                                             |
| 558 | NM_002910 | RENBP     | 17 | 8 | 0.0000817133 | Renin binding protein                                                                               |
| 559 | NM_001225 | CASP4     | 18 | 8 | 0.0000820716 | Caspase 4, apoptosis-related cysteine protease                                                      |

|     |           |              |    |   |              |                                                                                         |
|-----|-----------|--------------|----|---|--------------|-----------------------------------------------------------------------------------------|
| 560 | NM_016609 | SLC22A17     | 14 | 5 | 0.0000829929 | Solute carrier family 22 (organic cation transporter), member 17                        |
| 561 | NM_002594 | PCSK2        | 18 | 8 | 0.0000836224 | Proprotein convertase subtilisin/kexin type 2                                           |
| 562 | AK022598  |              | 18 | 8 | 0.0000845481 | CDNA FLJ12536 fis, clone NT2RM4000265                                                   |
| 563 | AB037780  |              | 19 | 5 | 0.0000858980 | Data not found                                                                          |
| 564 | NM_004863 | SPTLC2       | 18 | 8 | 0.0000861883 | Serine palmitoyltransferase, long chain base subunit 2                                  |
| 565 | AY007143  | FLJ21749     | 17 | 8 | 0.0000865048 | Hypothetical protein FLJ21749                                                           |
| 566 | NM_016339 | RAPGEFL1     | 15 | 7 | 0.0000869047 | Rap guanine nucleotide exchange factor (GEF)-like 1                                     |
| 567 | NM_000552 | VWF          | 19 | 6 | 0.0000876457 | Von Willebrand factor                                                                   |
| 568 | NM_014056 | HIG1         | 19 | 7 | 0.0000881214 | Likely ortholog of mouse hypoxia induced gene 1                                         |
| 569 | NM_017700 | FLJ20184     | 18 | 8 | 0.0000884538 | Hypothetical protein FLJ20184                                                           |
| 570 | NM_003197 |              | 19 | 8 | 0.0000887088 | Data not found                                                                          |
| 571 | NM_000120 | EPHX1        | 19 | 8 | 0.0000889059 | Epoxide hydrolase 1, microsomal (xenobiotic)                                            |
| 572 | NM_004524 | LLGL2        | 19 | 8 | 0.0000908113 | Lethal giant larvae homolog 2 (Drosophila)                                              |
| 573 | AF061034  | OPTN         | 18 | 8 | 0.0000913241 | Optineurin                                                                              |
| 574 | NM_003453 | ZNF198       | 19 | 8 | 0.0000923370 | Zinc finger protein 198                                                                 |
| 575 | NM_004087 | DLG1         | 19 | 8 | 0.0000926387 | Discs, large homolog 1 (Drosophila)                                                     |
| 576 | AL133430  | AKAP13       | 18 | 8 | 0.0000963058 | A kinase (PRKA) anchor protein 13                                                       |
| 577 | NM_004433 | ELF3         | 19 | 8 | 0.0000965535 | E74-like factor 3 (ets domain transcription factor, epithelial-specific )               |
| 578 | U31738    |              | 19 | 7 | 0.0000969185 | Cancer/testis antigen CT45-1                                                            |
| 579 | AJ227896  |              | 17 | 5 | 0.0000972165 | Data not found                                                                          |
| 580 | NM_017707 | DDEFL1       | 18 | 7 | 0.0000978366 | Development and differentiation enhancing factor-like 1                                 |
| 581 | NM_006732 | FOSB         | 18 | 8 | 0.0000989490 | FBJ murine osteosarcoma viral oncogene homolog B                                        |
| 582 | AK025966  | FLJ22313     | 19 | 8 | 0.0000990561 | Hypothetical protein FLJ22313                                                           |
| 583 | NM_000707 | AVPR1B       | 17 | 8 | 0.0000991087 | Arginine vasopressin receptor 1B                                                        |
| 584 | NM_014043 | DKFZP564O123 | 19 | 8 | 0.0000992857 | Chromatin modifying protein 2B                                                          |
| 585 | X98259    | HSMPP8       | 15 | 6 | 0.0000996274 | M-phase phosphoprotein, mpp8                                                            |
| 586 | D25274    | RAC1         | 19 | 8 | 0.0001021769 | Ras-related C3 botulinum toxin substrate 1 (rho family, small GTP binding protein Rac1) |
| 587 | D16891    | EEF1A1       | 19 | 8 | 0.0001024650 | Eukaryotic translation elongation factor 1 alpha 1                                      |
| 588 | NM_004820 | CYP7B1       | 19 | 6 | 0.0001032455 | Cytochrome P450, family 7, subfamily B, polypeptide 1                                   |
| 589 | NM_014058 | DESC1        | 13 | 6 | 0.0001035010 | Transmembrane protease, serine 11E                                                      |
| 590 | AB028451  | NCOR1        | 19 | 8 | 0.0001041477 | Nuclear receptor co-repressor 1                                                         |
| 591 | NM_019028 | ZDHHC13      | 19 | 8 | 0.0001052401 | Zinc finger, DHHC-type containing 13                                                    |
| 592 | NM_005142 | GIF          | 11 | 6 | 0.0001060422 | Gastric intrinsic factor (vitamin B synthesis)                                          |

|     |           |          |    |   |              |                                                                                     |
|-----|-----------|----------|----|---|--------------|-------------------------------------------------------------------------------------|
| 593 | D85245    | NR4A1    | 17 | 7 | 0.0001069678 | Nuclear receptor subfamily 4, group A, member 1                                     |
| 594 | NM_017694 | FLJ20160 | 15 | 7 | 0.0001075410 | FLJ20160 protein                                                                    |
| 595 | AB046766  | KIAA1546 | 16 | 7 | 0.0001101058 | KIAA1546 protein                                                                    |
| 596 | AL050204  |          | 14 | 8 | 0.0001111172 | Homo sapiens, Similar to likely ortholog of yeast ARV1, clone IMAGE:4733238, mRNA   |
| 597 | AK023835  | FLJ20308 | 17 | 6 | 0.0001111463 | Hypothetical protein FLJ20308                                                       |
| 598 | L19367    |          | 15 | 6 | 0.0001114087 |                                                                                     |
| 599 | NM_004541 | NDUFA1   | 19 | 8 | 0.0001136893 | NADH dehydrogenase (ubiquinone) 1 alpha subcomplex, 1, 7.5kDa                       |
| 600 | X74070    | BTF3     | 19 | 8 | 0.0001137186 | Basic transcription factor 3                                                        |
| 601 | AB014514  | FLJ30092 | 19 | 8 | 0.0001149909 | AF-1 specific protein phosphatase                                                   |
| 602 | NM_003320 | TUB      | 18 | 6 | 0.0001152331 | Tubby homolog (mouse)                                                               |
| 603 | AK026927  | MGC5297  | 18 | 8 | 0.0001154669 | Hypothetical protein MGC5297                                                        |
| 604 | AL079280  |          | 19 | 8 | 0.0001165478 | Data not found                                                                      |
| 605 | AK026683  | TMEM23   | 16 | 5 | 0.0001167929 | Transmembrane protein 23                                                            |
| 606 | NM_004635 | MAPKAPK3 | 18 | 8 | 0.0001168248 | Mitogen-activated protein kinase-activated protein kinase 3                         |
| 607 | AF245517  | ATP6V0A4 | 18 | 8 | 0.0001191563 | ATPase, H <sup>+</sup> transporting, lysosomal V0 subunit a isoform 4               |
| 608 | NM_000677 | ADORA3   | 16 | 6 | 0.0001198242 | Adenosine A3 receptor                                                               |
| 609 | NM_018660 | ZNF395   | 19 | 8 | 0.0001210514 | Zinc finger protein 395                                                             |
| 610 | U63336    | PRR3     | 19 | 7 | 0.0001213680 | Proline rich 3                                                                      |
| 611 | NM_005574 | LMO2     | 18 | 8 | 0.0001214589 | LIM domain only 2 (rhombotin-like 1)                                                |
| 612 | NM_006421 | ARFGEF1  | 17 | 8 | 0.0001218980 | ADP-ribosylation factor guanine nucleotide-exchange factor 1(brefeldin A-inhibited) |
| 613 | NM_003282 | TNNI2    | 17 | 7 | 0.0001222702 | Troponin I, skeletal, fast                                                          |
| 614 | AF060169  |          | 18 | 8 | 0.0001227941 | Data not found                                                                      |
| 615 | AK021747  | C14orf31 | 19 | 8 | 0.0001229667 | FERM domain containing 6                                                            |
| 616 | NM_015980 | HMP19    | 19 | 5 | 0.0001237187 | HMP19 protein                                                                       |
| 617 | AB040901  | KIAA1468 | 18 | 8 | 0.0001248868 | KIAA1468                                                                            |
| 618 | NM_003710 | SPINT1   | 18 | 8 | 0.0001249765 | Serine protease inhibitor, Kunitz type 1                                            |
| 619 | NM_006415 | SPTLC1   | 19 | 8 | 0.0001257716 | Serine palmitoyltransferase, long chain base subunit 1                              |
| 620 | NM_004557 | NOTCH4   | 15 | 5 | 0.0001259712 | Notch homolog 4 (Drosophila)                                                        |
| 621 | L10148    |          | 19 | 5 | 0.0001268361 | MRNA fragment                                                                       |
| 622 | NM_001619 | ADRBK1   | 18 | 6 | 0.0001271220 | Adrenergic, beta, receptor kinase 1                                                 |
| 623 | AK024106  |          | 13 | 7 | 0.0001275070 | Data not found                                                                      |
| 624 | NM_016351 | ADAM22   | 18 | 8 | 0.0001284101 | A disintegrin and metalloproteinase domain 22                                       |
| 625 | NM_006142 | SFN      | 18 | 8 | 0.0001285154 | Stratifin                                                                           |

|     |           |          |    |   |              |                                                                                                 |
|-----|-----------|----------|----|---|--------------|-------------------------------------------------------------------------------------------------|
| 626 | AL137708  |          | 18 | 8 | 0.0001296864 | Data not found                                                                                  |
| 627 | AF147311  | NT5C     | 19 | 8 | 0.0001302295 | 5', 3'-nucleotidase, cytosolic                                                                  |
| 628 | NM_002277 | KRTHA1   | 19 | 7 | 0.0001305837 | Keratin, hair, acidic, 1                                                                        |
| 629 | NM_003566 | EEA1     | 18 | 7 | 0.0001314573 | Early endosome antigen 1, 162kD                                                                 |
| 630 | AK022315  | RBMS3    | 18 | 7 | 0.0001319607 | RNA binding motif, single stranded interacting protein                                          |
| 631 | NM_003352 | SUMO1    | 19 | 8 | 0.0001331507 | SMT3 suppressor of mif two 3 homolog 1 (yeast)                                                  |
| 632 | AK024964  | NFIA     | 19 | 8 | 0.0001350618 | Nuclear factor I/A                                                                              |
| 633 | NM_001546 | ID4      | 15 | 8 | 0.0001352722 | Inhibitor of DNA binding 4, dominant negative helix-loop-helix protein                          |
| 634 | AK026745  | MDM1     | 19 | 8 | 0.0001364983 | Mdm4, transformed 3T3 cell double minute 1, p53 binding protein (mouse)                         |
| 635 | AK001825  |          | 16 | 8 | 0.0001368776 | Data not found                                                                                  |
| 636 | NM_017748 | FLJ20291 | 19 | 7 | 0.0001375737 | Hypothetical protein FLJ20291                                                                   |
| 637 | M93107    | BDH      | 18 | 8 | 0.0001389773 | 3-hydroxybutyrate dehydrogenase (heart, mitochondrial)                                          |
| 638 | AF279890  | KCNK10   | 19 | 8 | 0.0001389999 | Potassium channel, subfamily K, member 10                                                       |
| 639 | NM_017893 | SEMA4G   | 15 | 7 | 0.0001390116 | Sema domain, immunoglobulin domain (Ig), transmembrane domain (TM) and short cytoplasmic domain |
| 640 | AB002376  | C1orf1   | 17 | 6 | 0.0001392932 | CAZ-associated structural protein                                                               |
| 641 | NM_006660 | CLPX     | 17 | 8 | 0.0001393234 | ClpX caseinolytic protease X homolog (E. coli)                                                  |
| 642 | NM_018043 | TMEM16A  | 19 | 6 | 0.0001407377 | Transmembrane protein 16A                                                                       |
| 643 | NM_014653 | KIAA0789 | 19 | 7 | 0.0001408260 | KIAA0789 gene product                                                                           |
| 644 | NM_004365 | CETN3    | 19 | 8 | 0.0001411728 | Centrin, EF-hand protein, 3 (CDC31 homolog, yeast)                                              |
| 645 | NM_005090 | PLA2G4B  | 17 | 7 | 0.0001414309 | Phospholipase A2, group IVB (cytosolic)                                                         |
| 646 | NM_006073 | TRDN     | 19 | 7 | 0.0001427243 | Triadin                                                                                         |
| 647 | AF086415  | SPATA11  | 18 | 8 | 0.0001428671 | Spermatogenesis associated 11                                                                   |
| 648 | NM_007097 | CLTB     | 19 | 8 | 0.0001448700 | Clathrin, light polypeptide (Lcb)                                                               |
| 649 | NM_014723 | SNPH     | 12 | 7 | 0.0001491045 | Syntaphilin                                                                                     |
| 650 | NM_006638 | RPP40    | 17 | 8 | 0.0001504887 | Ribonuclease P 40kDa subunit                                                                    |
| 651 | NM_016112 | PKD2L1   | 13 | 5 | 0.0001508988 | Polycystic kidney disease 2-like 1                                                              |
| 652 | AK025039  | POF1B    | 15 | 5 | 0.0001517126 | Premature ovarian failure, 1B                                                                   |
| 653 | AF052107  | OACT2    | 16 | 7 | 0.0001528094 | O-acyltransferase (membrane bound) domain containing 2                                          |
| 654 | AK024138  | SMURF2   | 13 | 5 | 0.0001528768 | SMAD specific E3 ubiquitin protein ligase 2                                                     |
| 655 | AK025603  | HSPC159  | 15 | 8 | 0.0001548673 | HSPC159 protein                                                                                 |
| 656 | Z36840    |          | 15 | 5 | 0.0001552170 | Data not found                                                                                  |
| 657 | AK024996  | RNF38    | 19 | 8 | 0.0001577783 | Ring finger protein 38                                                                          |
| 658 | NM_005541 | INPP5D   | 16 | 7 | 0.0001579567 | Inositol polyphosphate-5-phosphatase, 145kDa                                                    |

|     |           |          |    |   |              |                                                                                                 |
|-----|-----------|----------|----|---|--------------|-------------------------------------------------------------------------------------------------|
| 659 | AK025332  | PLXNA2   | 15 | 7 | 0.0001588933 | Plexin A2                                                                                       |
| 660 | NM_003687 | PDLIM4   | 19 | 8 | 0.0001589990 | PDZ and LIM domain 4                                                                            |
| 661 | NM_002483 | CEACAM6  | 16 | 8 | 0.0001594309 | Carcinoembryonic antigen-related cell adhesion molecule 6 (non-specific cross reacting antigen) |
| 662 | AB040970  | RUFY2    | 19 | 8 | 0.0001602868 | RUN and FYVE domain containing 2                                                                |
| 663 | AL442097  |          | 15 | 8 | 0.0001605536 | CDNA FLJ35396 fis, clone SKNSH2003483                                                           |
| 664 | AL359600  | ABCC5    | 15 | 7 | 0.0001610691 | ATP-binding cassette, sub-family C (CFTR/MRP), member 5                                         |
| 665 | M62402    | IGFBP6   | 18 | 8 | 0.0001622721 | Insulin-like growth factor binding protein 6                                                    |
| 666 | U06699    | SEMA6A   | 14 | 7 | 0.0001625061 | Sema domain, transmembrane domain (TM), and cytoplasmic domain, (semaphorin) 6A                 |
| 667 | U38442    | DEPC-1   | 15 | 8 | 0.0001662652 | Prostate cancer antigen-1                                                                       |
| 668 | NM_005490 | SH2D3A   | 18 | 6 | 0.0001676755 | SH2 domain containing 3A                                                                        |
| 669 | NM_006950 | SYN1     | 13 | 7 | 0.0001687291 | Synapsin I                                                                                      |
| 670 | NM_001041 | SI       | 19 | 8 | 0.0001689938 | Sucrase-isomaltase (alpha-glucosidase)                                                          |
| 671 | U80774    |          | 17 | 5 | 0.0001722803 | Data not found                                                                                  |
| 672 | NM_015313 | ARHGEF12 | 19 | 8 | 0.0001725602 | Rho guanine nucleotide exchange factor (GEF) 12                                                 |
| 673 | NM_017450 | BAIAP2   | 18 | 8 | 0.0001729310 | BAI1-associated protein 2                                                                       |
| 674 | AB007932  | PLXNA2   | 19 | 7 | 0.0001739290 | Plexin A2                                                                                       |
| 675 | NM_004823 | KCNK6    | 17 | 8 | 0.0001740531 | Potassium channel, subfamily K, member 6                                                        |
| 676 | AK026702  | FLJ23049 | 18 | 7 | 0.0001746044 | Hypothetical protein FLJ23049                                                                   |
| 677 | NM_003392 | WNT5A    | 18 | 8 | 0.0001773699 | Wingless-type MMTV integration site family, member 5A                                           |
| 678 | AK022648  | FLJ12586 | 17 | 8 | 0.0001778194 | Zinc finger protein 329                                                                         |
| 679 | AB037722  | HECW2    | 18 | 8 | 0.0001816922 | HECT, C2 and WW domain containing E3 ubiquitin protein ligase 2                                 |
| 680 | NM_014453 | BC-2     | 18 | 8 | 0.0001833703 | Chromatin modifying protein 2A                                                                  |
| 681 | NM_006254 | PRKCD    | 18 | 7 | 0.0001837015 | Protein kinase C, delta                                                                         |
| 682 | AF179890  | POLD4    | 14 | 8 | 0.0001838003 | Polymerase (DNA-directed), delta 4                                                              |
| 683 | AB028990  | EXOC7    | 18 | 7 | 0.0001839274 | Exocyst complex component 7                                                                     |
| 684 | AK026659  |          | 11 | 7 | 0.0001840642 | CDNA: FLJ23006 fis, clone LNG00414                                                              |
| 685 | NM_015057 | MYCBP2   | 18 | 8 | 0.0001870143 | MYC binding protein 2                                                                           |
| 686 | AL122047  | ARV1     | 10 | 8 | 0.0001873951 | ARV1 homolog (yeast)                                                                            |
| 687 | NM_005488 | TOM1     | 19 | 8 | 0.0001878820 | Target of myb1 (chicken)                                                                        |
| 688 | NM_004731 | SLC16A7  | 18 | 8 | 0.0001889505 | Solute carrier family 16 (monocarboxylic acid transporters), member 7                           |
| 689 | AF164438  | NPAS3    | 17 | 8 | 0.0001890984 | Neuronal PAS domain protein 3                                                                   |
| 690 | NM_006613 | GRAP     | 17 | 6 | 0.0001893586 | GRB2-related adaptor protein                                                                    |
| 691 | AB007883  | KIAA0423 | 18 | 8 | 0.0001893631 | KIAA0423                                                                                        |

|     |           |          |    |   |              |                                                                                                                           |
|-----|-----------|----------|----|---|--------------|---------------------------------------------------------------------------------------------------------------------------|
| 692 | NM_017654 | SAMD9    | 17 | 7 | 0.0001901287 | Sterile alpha motif domain containing 9                                                                                   |
| 693 | NM_012468 | TCL6     | 17 | 7 | 0.0001901431 | T-cell leukemia/lymphoma 6                                                                                                |
| 694 | NM_003708 | RODH-4   | 17 | 7 | 0.0001902269 | Retinol dehydrogenase 16 (all-trans and 13-cis)                                                                           |
| 695 | AK023505  | RSNL2    | 15 | 8 | 0.0001905011 | Restin-like 2                                                                                                             |
| 696 | AK024573  | FLJ20920 | 19 | 8 | 0.0001920663 | Hypothetical protein FLJ20920                                                                                             |
| 697 | NM_000694 | ALDH3B1  | 19 | 8 | 0.0001935631 | Aldehyde dehydrogenase 3 family, member B1                                                                                |
| 698 | NM_014606 | HERC3    | 19 | 8 | 0.0001945413 | Hect domain and RLD 3                                                                                                     |
| 699 | AK025337  | PPFIBP2  | 17 | 6 | 0.0001948107 | PTPRF interacting protein, binding protein 2 (liprin beta 2)                                                              |
| 700 | NM_017581 | CHRNA9   | 18 | 6 | 0.0001959955 | Cholinergic receptor, nicotinic, alpha polypeptide 9                                                                      |
| 701 | NM_003772 | JRKL     | 19 | 8 | 0.0001971264 | Jerky homolog-like (mouse)                                                                                                |
| 702 | NM_000987 | RPL26    | 18 | 8 | 0.0001991361 | Similar to 60S ribosomal protein L26                                                                                      |
| 703 | X99631    | HOXC12   | 19 | 7 | 0.0001996451 | Homeo box C12                                                                                                             |
| 704 | AK024794  | ACIN1    | 19 | 8 | 0.0002034068 | Apoptotic chromatin condensation inducer 1                                                                                |
| 705 | NM_000918 | P4HB     | 18 | 7 | 0.0002042812 | Procollagen-proline, 2-oxoglutarate 4-dioxygenase (proline 4-hydroxylase), beta polypeptide (protein disulfide isomerase) |
| 706 | NM_005227 | EFNA4    | 19 | 6 | 0.0002057950 | Ephrin-A4                                                                                                                 |
| 707 | NM_014587 | SOX8     | 19 | 7 | 0.0002063354 | SRY (sex determining region Y)-box 8                                                                                      |
| 708 | NM_001651 | AQP5     | 16 | 5 | 0.0002074580 | Aquaporin 5                                                                                                               |
| 709 | NM_002779 | PSD      | 19 | 8 | 0.0002074963 | Pleckstrin and Sec7 domain containing                                                                                     |
| 710 | NM_002865 | RAB2     | 19 | 8 | 0.0002082852 | RAB2, member RAS oncogene family                                                                                          |
| 711 | AF174605  | FBXO25   | 18 | 7 | 0.0002087580 | F-box protein 25                                                                                                          |
| 712 | AK023783  | UBE2D2   | 15 | 6 | 0.0002089058 | Ubiquitin-conjugating enzyme E2D 2 (UBC4/5 homolog, yeast)                                                                |
| 713 | AJ012502  | RAC1     | 19 | 8 | 0.0002100354 | Ras-related C3 botulinum toxin substrate 1 (rho family, small GTP binding protein Rac1)                                   |
| 714 | NM_001359 | DECR1    | 19 | 8 | 0.0002120861 | 2,4-dienoyl CoA reductase 1, mitochondrial                                                                                |
| 715 | NM_016161 | A4GNT    | 15 | 7 | 0.0002149816 | Alpha-1,4-N-acetylglucosaminyltransferase                                                                                 |
| 716 | NM_002768 | PCOLN3   | 19 | 7 | 0.0002154953 | Procollagen (type III) N-endopeptidase                                                                                    |
| 717 | NM_005168 | ARHE     | 18 | 7 | 0.0002165790 | Rho family GTPase 3                                                                                                       |
| 718 | S70004    | GYS2     | 19 | 8 | 0.0002173426 | Glycogen synthase 2 (liver)                                                                                               |
| 719 | NM_016824 | ADD3     | 18 | 7 | 0.0002190481 | Adducin 3 (gamma)                                                                                                         |
| 720 | AL133580  | SCOC     | 19 | 8 | 0.0002193815 | Short coiled-coil protein                                                                                                 |
| 721 | AB014599  | BICD2    | 19 | 8 | 0.0002206956 | Bicaudal D homolog 2 (Drosophila)                                                                                         |
| 722 | AB007965  | CYHR1    | 19 | 6 | 0.0002209937 | Cysteine/histidine-rich 1                                                                                                 |
| 723 | AF084516  |          | 17 | 8 | 0.0002214799 | Data not found                                                                                                            |
| 724 | NM_018162 |          | 19 | 8 | 0.0002228422 | Data not found                                                                                                            |

|     |           |         |    |   |              |                                                                                                      |
|-----|-----------|---------|----|---|--------------|------------------------------------------------------------------------------------------------------|
| 725 | NM_004004 | GJB2    | 16 | 6 | 0.0002238384 | Gap junction protein, beta 2, 26kDa (connexin 26)                                                    |
| 726 | AK024394  | STK35   | 18 | 8 | 0.0002240223 | Serine/threonine kinase 35                                                                           |
| 727 | AF217974  | TSRC1   | 19 | 7 | 0.0002262808 | Thrombospondin repeat containing 1                                                                   |
| 728 | NM_004841 | RASAL2  | 18 | 8 | 0.0002275164 | RAS protein activator like 2                                                                         |
| 729 | NM_002395 | ME1     | 17 | 8 | 0.0002279385 | Malic enzyme 1, NADP(+)-dependent, cytosolic                                                         |
| 730 | AB028998  | TENC1   | 19 | 8 | 0.0002281712 | Tensin like C1 domain containing phosphatase (tensin 2)                                              |
| 731 | NM_000385 | AQP1    | 19 | 6 | 0.0002294175 | Aquaporin 1 (channel-forming integral protein, 28kDa)                                                |
| 732 | NM_006211 | PENK    | 17 | 7 | 0.0002300737 | Proenkephalin                                                                                        |
| 733 | NM_003162 | STRN    | 16 | 7 | 0.0002317219 | Striatin, calmodulin binding protein                                                                 |
| 734 | AL117595  | KLF6    | 19 | 8 | 0.0002333002 | Kruppel-like factor 6                                                                                |
| 735 | AF030107  | RGS13   | 14 | 5 | 0.0002354502 | Regulator of G-protein signalling 13                                                                 |
| 736 | AB007859  | ZZEF1   | 19 | 8 | 0.0002402545 | Zinc finger, ZZ-type with EF-hand domain 1                                                           |
| 737 | NM_000530 | MPZ     | 16 | 6 | 0.0002403363 | Myelin protein zero (Charcot-Marie-Tooth neuropathy 1B)                                              |
| 738 | NM_014347 | ZNF324  | 18 | 7 | 0.0002409508 | Zinc finger protein 324                                                                              |
| 739 | NM_004723 | ARHGEF2 | 19 | 8 | 0.0002430398 | Rho/rac guanine nucleotide exchange factor (GEF) 2                                                   |
| 740 | NM_006681 | NMU     | 17 | 6 | 0.0002443613 | Neuromedin U                                                                                         |
| 741 | NM_015994 | ATP6V1D | 12 | 8 | 0.0002444671 | ATPase, H <sup>+</sup> transporting, lysosomal 34kDa, V1 subunit D                                   |
| 742 | NM_005288 | GPR12   | 19 | 5 | 0.0002450192 | Hypothetical protein LOC283535                                                                       |
| 743 | D85433    | COMMD1  | 16 | 8 | 0.0002450525 | Copper metabolism (Murr1) domain containing 1                                                        |
| 744 | AK021529  | FBXL18  | 17 | 8 | 0.0002476715 | F-box and leucine-rich repeat protein 18                                                             |
| 745 | U67037    | DBCCR1L | 19 | 8 | 0.0002488194 | Family with sequence similarity 5, member C                                                          |
| 746 | AL133663  |         | 16 | 7 | 0.0002497699 | Data not found                                                                                       |
| 747 | NM_006729 | DIAPH2  | 19 | 8 | 0.0002499271 | Early lymphoid activation protein                                                                    |
| 748 | NM_001723 | DST     | 18 | 8 | 0.0002501708 | Dystonin                                                                                             |
| 749 | NM_015917 | GSTK1   | 19 | 8 | 0.0002511468 | Glutathione S-transferase kappa 1                                                                    |
| 750 | NM_003768 | PEA15   | 15 | 8 | 0.0002529073 | Phosphoprotein enriched in astrocytes 15                                                             |
| 751 | NM_017658 | BTBD5   | 18 | 8 | 0.0002540601 | BTB (POZ) domain containing 5                                                                        |
| 752 | NM_020362 | HT014   | 19 | 8 | 0.0002546265 | Chromosome 1 open reading frame 128                                                                  |
| 753 | NM_018588 |         | 19 | 8 | 0.0002561013 | Data not found                                                                                       |
| 754 | AF000416  | EXTL2   | 19 | 8 | 0.0002568960 | Exostoses (multiple)-like 2                                                                          |
| 755 | NM_003804 | RIPK1   | 16 | 7 | 0.0002579002 | Receptor (TNFRSF)-interacting serine-threonine kinase 1                                              |
| 756 | NM_001047 | SRD5A1  | 19 | 7 | 0.0002593974 | Steroid-5-alpha-reductase, alpha polypeptide 1 (3-oxo-5 alpha-steroid delta 4-dehydrogenase alpha 1) |
| 757 | NM_005980 | S100P   | 17 | 8 | 0.0002599396 | S100 calcium binding protein P                                                                       |

|     |           |          |    |   |              |                                                                                              |
|-----|-----------|----------|----|---|--------------|----------------------------------------------------------------------------------------------|
| 758 | AF155103  | ANKRD13  | 19 | 8 | 0.0002601871 | Ankyrin repeat domain 13                                                                     |
| 759 | NM_005716 | RGS19IP1 | 19 | 8 | 0.0002614265 | GIPC PDZ domain containing family, member 1                                                  |
| 760 | NM_002468 | MYD88    | 18 | 8 | 0.0002619759 | Myeloid differentiation primary response gene (88)                                           |
| 761 | AF040257  | ATAD1    | 13 | 5 | 0.0002636130 | ATPase family, AAA domain containing 1                                                       |
| 762 | AK021620  |          | 15 | 7 | 0.0002641627 | Data not found                                                                               |
| 763 | NM_005270 | GLI2     | 12 | 7 | 0.0002664092 | GLI-Kruppel family member GLI2                                                               |
| 764 | NM_012153 | EHF      | 19 | 8 | 0.0002686979 | Ets homologous factor                                                                        |
| 765 | NM_014428 | TJP3     | 13 | 8 | 0.0002687260 | Tight junction protein 3 (zona occludens 3)                                                  |
| 766 | NM_016433 | GLTP     | 16 | 8 | 0.0002702535 | Glycolipid transfer protein                                                                  |
| 767 | NM_012229 | NT5C2    | 17 | 7 | 0.0002715531 | 5'-nucleotidase, cytosolic II                                                                |
| 768 | NM_001608 | ACADL    | 17 | 8 | 0.0002721160 | Acyl-Coenzyme A dehydrogenase, long chain                                                    |
| 769 | NM_014969 | WDR47    | 18 | 8 | 0.0002734614 | WD repeat domain 47                                                                          |
| 770 | AF286160  | PLEKHA1  | 19 | 8 | 0.0002738112 | Pleckstrin homology domain containing, family A (phosphoinositide binding specific) member 1 |
| 771 | AF086410  | CMKOR1   | 13 | 6 | 0.0002746138 | Chemokine orphan receptor 1                                                                  |
| 772 | NM_001793 | CDH3     | 12 | 8 | 0.0002749649 | Cadherin 3, type 1, P-cadherin (placental)                                                   |
| 773 | AK022154  | HS2ST1   | 16 | 7 | 0.0002759241 | Heparan sulfate 2-O-sulfotransferase 1                                                       |
| 774 | U80766    | SNTG1    | 8  | 8 | 0.0002769171 | Syntrophin, gamma 1                                                                          |
| 775 | AJ227907  | INADL    | 14 | 6 | 0.0002774711 | InaD-like (Drosophila)                                                                       |
| 776 | M28983    |          | 16 | 5 | 0.0002781314 | Data not found                                                                               |
| 777 | U66621    | RAB1B    | 19 | 8 | 0.0002787063 | RAB1B, member RAS oncogene family                                                            |
| 778 | AK023691  | FLJ12800 | 19 | 6 | 0.0002796882 | Hypothetical protein FLJ12800                                                                |
| 779 | AF286598  |          | 19 | 8 | 0.0002807403 | Data not found                                                                               |
| 780 | NM_006980 | MTERF    | 19 | 7 | 0.0002808621 | Mitochondrial transcription termination factor                                               |
| 781 | AY007729  | PDLIM2   | 18 | 7 | 0.0002809070 | PDZ and LIM domain 2 (mystique)                                                              |
| 782 | AF144700  | TIMM13   | 13 | 7 | 0.0002809126 | Translocase of inner mitochondrial membrane 13 homolog (yeast)                               |
| 783 | NM_015509 | NECAP1   | 19 | 7 | 0.0002829444 | Adaptin-ear-binding coat-associated protein 1                                                |
| 784 | AY007089  |          | 16 | 5 | 0.0002829784 | Clone TCCCIA00110 mRNA sequence                                                              |
| 785 | NM_018029 | FLJ10213 | 17 | 8 | 0.0002840459 | Hypothetical protein FLJ10213                                                                |
| 786 | NM_014019 |          | 19 | 7 | 0.0002878641 | Data not found                                                                               |
| 787 | AK024732  | OGFRL1   | 18 | 8 | 0.0002880464 | Opioid growth factor receptor-like 1                                                         |
| 788 | NM_001561 | TNFRSF9  | 13 | 6 | 0.0002887002 | Tumor necrosis factor receptor superfamily, member 9                                         |
| 789 | S74647    | CEACAM1  | 14 | 7 | 0.0002891904 | Carcinoembryonic antigen-related cell adhesion molecule 1 (biliary glycoprotein)             |
| 790 | NM_002357 | MAD      | 18 | 8 | 0.0002896757 | MAX dimerization protein 1                                                                   |



|     |           |          |    |   |              |                                                                              |
|-----|-----------|----------|----|---|--------------|------------------------------------------------------------------------------|
| 791 | AB002298  | PDZK3    | 18 | 8 | 0.0002902641 | PDZ domain containing 3                                                      |
| 792 | NM_003738 | PTCH2    | 18 | 7 | 0.0002917063 | Patched homolog 2 (Drosophila)                                               |
| 793 | NM_000099 | CST3     | 19 | 7 | 0.0002922793 | Cystatin C (amyloid angiopathy and cerebral hemorrhage)                      |
| 794 | NM_014900 | COBLL1   | 19 | 7 | 0.0002925027 | COBL-like 1                                                                  |
| 795 | NM_006024 | TAX1BP1  | 19 | 8 | 0.0002928652 | Tax1 (human T-cell leukemia virus type I) binding protein 1                  |
| 796 | AF202146  | Cep70    | 19 | 8 | 0.0002932162 | P10-binding protein                                                          |
| 797 | AB037802  | COG1     | 19 | 8 | 0.0002936532 | Component of oligomeric golgi complex 1                                      |
| 798 | NM_015322 | FEM1B    | 19 | 7 | 0.0002938034 | Fem-1 homolog b (C. elegans)                                                 |
| 799 | NM_006690 | MMP24    | 18 | 7 | 0.0002942701 | Matrix metalloproteinase 24 (membrane-inserted)                              |
| 800 | AF113212  | RGS5     | 15 | 6 | 0.0002944951 | Regulator of G-protein signalling 5                                          |
| 801 | AK026377  | SPAG16   | 17 | 8 | 0.0002946116 | Sperm associated antigen 16                                                  |
| 802 | AK024438  | FLJ38705 | 11 | 6 | 0.0002976693 | Hypothetical protein FLJ38705                                                |
| 803 | NM_002648 | PIM1     | 19 | 8 | 0.0002977622 | Pim-1 oncogene                                                               |
| 804 | S51112    |          | 16 | 8 | 0.0003032555 | Data not found                                                               |
| 805 | NM_002407 | SCGB2A1  | 19 | 5 | 0.0003054706 | Secretoglobin, family 2A, member 1                                           |
| 806 | NM_006225 | PLCD1    | 17 | 7 | 0.0003055497 | Phospholipase C, delta 1                                                     |
| 807 | NM_014553 | TFCP2L1  | 19 | 8 | 0.0003075754 | Transcription factor CP2-like 1                                              |
| 808 | NM_006470 | TRIM16   | 17 | 8 | 0.0003082922 | Tripartite motif-containing 16                                               |
| 809 | X93500    |          | 17 | 7 | 0.0003089516 | Upstream hIL-4 primer for unknown sequence (166bp)                           |
| 810 | NM_017447 | C21orf91 | 19 | 6 | 0.0003100675 | Chromosome 21 open reading frame 91                                          |
| 811 | NM_000142 | FGFR3    | 19 | 8 | 0.0003115088 | Fibroblast growth factor receptor 3 (achondroplasia, thanatophoric dwarfism) |
| 812 | NM_017790 | RGS3     | 18 | 6 | 0.0003118893 | Regulator of G-protein signalling 3                                          |
| 813 | NM_013293 | TRA2A    | 19 | 8 | 0.0003131096 | Transformer-2 alpha                                                          |
| 814 | AB011152  | CENTD1   | 15 | 5 | 0.0003132472 | Centaurin, delta 1                                                           |
| 815 | U92023    |          | 14 | 6 | 0.0003171231 | Data not found                                                               |
| 816 | NM_007116 |          | 18 | 8 | 0.0003198937 | Data not found                                                               |
| 817 | NM_018027 | FRMD4A   | 19 | 7 | 0.0003201606 | FERM domain containing 4A                                                    |
| 818 | AF035314  | C20orf19 | 16 | 8 | 0.0003235339 | Chromosome 20 open reading frame 19                                          |
| 819 | NM_002661 | PLCG2    | 19 | 8 | 0.0003243093 | Phospholipase C, gamma 2 (phosphatidylinositol-specific)                     |
| 820 | NM_016131 | RAB10    | 19 | 8 | 0.0003257341 | RAB10, member RAS oncogene family                                            |
| 821 | AK021494  | CLCN5    | 18 | 6 | 0.0003272182 | Chloride channel 5 (nephrolithiasis 2, X-linked, Dent disease)               |
| 822 | AL096734  | FLJ12671 | 19 | 8 | 0.0003282165 | Interferon stimulated exonuclease gene 20kDa-like 2                          |
| 823 | NM_002111 | HD       | 15 | 8 | 0.0003302657 | Huntingtin (Huntington disease)                                              |

|     |           |          |    |   |              |                                                                          |
|-----|-----------|----------|----|---|--------------|--------------------------------------------------------------------------|
| 824 | NM_004156 | PPP2CB   | 19 | 8 | 0.0003346733 | Protein phosphatase 2 (formerly 2A), catalytic subunit, beta isoform     |
| 825 | NM_015865 | SLC14A1  | 16 | 8 | 0.0003346870 | Solute carrier family 14 (urea transporter), member 1 (Kidd blood group) |
| 826 | AK022609  | FLJ12547 | 17 | 5 | 0.0003360387 | Hypothetical protein FLJ12547                                            |
| 827 | NM_012428 | SDFR1    | 19 | 8 | 0.0003407000 | Stromal cell derived factor receptor 1                                   |
| 828 | NM_003761 | VAMP8    | 19 | 8 | 0.0003416971 | Vesicle-associated membrane protein 8 (endobrevin)                       |
| 829 | NM_002854 | PVALB    | 14 | 5 | 0.0003445157 | Parvalbumin                                                              |
| 830 | NM_015873 | VILL     | 13 | 6 | 0.0003467933 | Villin-like                                                              |
| 831 | AK022962  | PBX1     | 19 | 8 | 0.0003484081 | Pre-B-cell leukemia transcription factor 1                               |
| 832 | NM_003490 | SYN3     | 13 | 6 | 0.0003489880 | Synapsin III                                                             |
| 833 | AL049679  | HS6ST2   | 18 | 8 | 0.0003491626 | Heparan sulfate 6-O-sulfotransferase 2                                   |
| 834 | NM_002231 | KAI1     | 19 | 8 | 0.0003509090 | CD82 antigen                                                             |
| 835 | L09080    |          | 19 | 8 | 0.0003548414 | Cell-type T-cell immunoglobulin gamma-chain, V region (IGHV@)            |
| 836 | NM_016081 | KIAA0992 | 9  | 8 | 0.0003575752 | Palladin                                                                 |
| 837 | NM_016477 |          | 19 | 8 | 0.0003588381 | Data not found                                                           |
| 838 | AF118224  | ST14     | 19 | 8 | 0.0003589104 | Suppression of tumorigenicity 14 (colon carcinoma, matriptase, epithin)  |
| 839 | NM_001348 | DAPK3    | 19 | 8 | 0.0003612860 | Death-associated protein kinase 3                                        |
| 840 | AL161983  | EIF4E3   | 15 | 7 | 0.0003629147 | Eukaryotic translation initiation factor 4E member 3                     |
| 841 | NM_020162 | DHX33    | 19 | 8 | 0.0003638996 | DEAH (Asp-Glu-Ala-His) box polypeptide 33                                |
| 842 | AF086534  | MCCC2    | 16 | 6 | 0.0003656120 | Methylcrotonoyl-Coenzyme A carboxylase 2 (beta)                          |
| 843 | NM_016297 | PCYOX1   | 18 | 8 | 0.0003665611 | Prenylcysteine oxidase 1                                                 |
| 844 | NM_002755 | MAP2K1   | 18 | 8 | 0.0003686428 | Mitogen-activated protein kinase kinase 1                                |
| 845 | NM_006016 | CD164    | 17 | 8 | 0.0003698305 | CD164 antigen, sialomucin                                                |
| 846 | AK021591  | MGC33371 | 19 | 8 | 0.0003726774 | Hypothetical protein MGC33371                                            |
| 847 | NM_006011 | SIAT8B   | 17 | 7 | 0.0003732807 | ST8 alpha-N-acetyl-neuraminide alpha-2,8-sialyltransferase 2             |
| 848 | AF131784  | RAB27B   | 16 | 6 | 0.0003752820 | RAB27B, member RAS oncogene family                                       |
| 849 | M32219    |          | 15 | 7 | 0.0003754619 | Data not found                                                           |
| 850 | NM_017547 | H17      | 18 | 8 | 0.0003766567 | Hypothetical protein H17                                                 |
| 851 | AF206020  |          | 16 | 6 | 0.0003769266 | Ig rearranged kappa-chain mRNA V-J1-region, hybridoma AE6-5, 5' end      |
| 852 | AK025593  | YTHDC2   | 19 | 8 | 0.0003779051 | YTH domain containing 2                                                  |
| 853 | NM_004578 | RAB4A    | 16 | 7 | 0.0003793027 | RAB4A, member RAS oncogene family                                        |
| 854 | NM_012327 | PIGN     | 19 | 8 | 0.0003794284 | Phosphatidylinositol glycan, class N                                     |
| 855 | AL137722  | WARP     | 16 | 7 | 0.0003794742 | Von Willebrand factor A domain containing 1                              |
| 856 | AJ008152  | MAP3K14  | 18 | 6 | 0.0003801627 | Mitogen-activated protein kinase kinase kinase 14                        |

|     |           |           |    |   |              |                                                                                                 |
|-----|-----------|-----------|----|---|--------------|-------------------------------------------------------------------------------------------------|
| 857 | NM_005114 | HS3ST1    | 18 | 5 | 0.0003835662 | Heparan sulfate (glucosamine) 3-O-sulfotransferase 1                                            |
| 858 | AF060936  | MLLT10    | 18 | 8 | 0.0003861293 | Myeloid/lymphoid or mixed-lineage leukemia (trithorax homolog, Drosophila); translocated to, 10 |
| 859 | S82198    | CTRC      | 18 | 7 | 0.0003896573 | Chymotrypsin C (caldecrin)                                                                      |
| 860 | NM_000160 | GCGR      | 18 | 6 | 0.0003910206 | Glucagon receptor                                                                               |
| 861 | NM_013396 | USP25     | 19 | 8 | 0.0003917667 | Ubiquitin specific protease 25                                                                  |
| 862 | NM_000161 | GCH1      | 17 | 8 | 0.0003918631 | GTP cyclohydrolase 1 (dopa-responsive dystonia)                                                 |
| 863 | AF088076  |           | 11 | 5 | 0.0003933492 | Full length insert cDNA clone ZE01A04                                                           |
| 864 | NM_019064 | SDK2      | 16 | 7 | 0.0003942358 | Sidekick homolog 2 (chicken)                                                                    |
| 865 | NM_002518 | NPAS2     | 17 | 6 | 0.0003960801 | Neuronal PAS domain protein 2                                                                   |
| 866 | NM_002166 | ID2       | 19 | 8 | 0.0003989803 | Inhibitor of DNA binding 2, dominant negative helix-loop-helix protein                          |
| 867 | NM_012397 | SERPINB13 | 17 | 6 | 0.0003990321 | UV-B repressed sequence, HUR 7                                                                  |
| 868 | NM_002709 | PPP1CB    | 19 | 8 | 0.0003993869 | Protein phosphatase 1, catalytic subunit, beta isoform                                          |
| 869 | NM_002652 | PIP       | 19 | 8 | 0.0004009493 | Prolactin-induced protein                                                                       |
| 870 | AK027031  | ELOVL6    | 19 | 7 | 0.0004019485 | ELOVL family member 6, elongation of long chain fatty acids (FEN1/Elo2, SUR4/Elo3-like, yeast)  |
| 871 | NM_018449 | UBAP2     | 19 | 8 | 0.0004036030 | Ubiquitin associated protein 2                                                                  |
| 872 | NM_003657 | BCAS1     | 18 | 8 | 0.0004062316 | Breast carcinoma amplified sequence 1                                                           |
| 873 | AK025271  | EEF1G     | 19 | 8 | 0.0004071919 | Eukaryotic translation elongation factor 1 gamma                                                |
| 874 | NM_003186 | TAGLN     | 16 | 7 | 0.0004081807 | Transgelin                                                                                      |
| 875 | NM_001525 | HCRTR1    | 18 | 5 | 0.0004087469 | Hypocretin (orexin) receptor 1                                                                  |
| 876 | AF007190  |           | 19 | 5 | 0.0004104262 | SIB 297 intestinal mucin (MUC3)                                                                 |
| 877 | L23870    | TMLHE     | 12 | 6 | 0.0004113847 | Trimethyllysine hydroxylase, epsilon                                                            |
| 878 | AK025605  | ZDHHC6    | 19 | 8 | 0.0004124636 | Zinc finger, DHHC-type containing 6                                                             |
| 879 | NM_020169 | LXN       | 18 | 7 | 0.0004127994 | Latexin                                                                                         |
| 880 | AK022801  | EML4      | 18 | 5 | 0.0004139881 | Echinoderm microtubule associated protein like 4                                                |
| 881 | AB028976  | SAMD4     | 17 | 8 | 0.0004155307 | Sterile alpha motif domain containing 4                                                         |
| 882 | AF113008  | RPS20     | 19 | 8 | 0.0004165622 | Ribosomal protein S20                                                                           |
| 883 | NM_003670 | BHLHB2    | 19 | 8 | 0.0004181097 | Basic helix-loop-helix domain containing, class B, 2                                            |
| 884 | NM_003433 | ZNF132    | 19 | 8 | 0.0004183827 | Zinc finger protein 132 (clone pHZ-12)                                                          |
| 885 | NM_002900 | RBP3      | 17 | 8 | 0.0004187827 | Retinol binding protein 3, interstitial                                                         |
| 886 | NM_007106 | UBL3      | 17 | 7 | 0.0004187840 | Ubiquitin-like 3                                                                                |
| 887 | NM_017915 | FLJ20641  | 19 | 7 | 0.0004188226 | Hypothetical protein FLJ20641                                                                   |
| 888 | NM_014466 | TEKT2     | 15 | 6 | 0.0004210763 | Tektin 2 (testicular)                                                                           |
| 889 | NM_005539 | INPP5A    | 19 | 6 | 0.0004210859 | Inositol polyphosphate-5-phosphatase, 40kDa                                                     |

|     |           |              |    |   |              |                                                                                                      |
|-----|-----------|--------------|----|---|--------------|------------------------------------------------------------------------------------------------------|
| 890 | NM_006292 | TSG101       | 19 | 8 | 0.0004214925 | Tumor susceptibility gene 101                                                                        |
| 891 | NM_001630 | ANXA8        | 17 | 7 | 0.0004217916 | Annexin A8                                                                                           |
| 892 | NM_006336 | C9orf60      | 19 | 8 | 0.0004264818 | Zyg-11 homolog B (C. elegans)-like                                                                   |
| 893 | M57399    | PTN          | 16 | 6 | 0.0004267522 | Pleiotrophin (heparin binding growth factor 8, neurite growth-promoting factor 1)                    |
| 894 | AF263462  | CGN          | 19 | 8 | 0.0004287407 | Cingulin                                                                                             |
| 895 | NM_014584 | ERO1L        | 19 | 8 | 0.0004290301 | ERO1-like (S. cerevisiae)                                                                            |
| 896 | NM_005097 | LGII         | 18 | 7 | 0.0004300296 | Leucine-rich, glioma inactivated 1                                                                   |
| 897 | U50526    | 13CDNA73     | 18 | 6 | 0.0004315181 | Hypothetical protein CG003                                                                           |
| 898 | NM_020467 | LOC57228     | 16 | 8 | 0.0004372943 | Hypothetical protein from clone 643                                                                  |
| 899 | NM_018457 | DKFZp564J157 | 16 | 8 | 0.0004414106 | DKFZp564J157 protein                                                                                 |
| 900 | NM_015515 | KRT23        | 17 | 7 | 0.0004414723 | Keratin 23 (histone deacetylase inducible)                                                           |
| 901 | AF070591  | FLJ46061     | 18 | 5 | 0.0004444251 | FLJ46061 protein                                                                                     |
| 902 | AK025941  | KLF16        | 19 | 8 | 0.0004455971 | Kruppel-like factor 16                                                                               |
| 903 | NM_017675 | PC-LKC       | 14 | 6 | 0.0004477371 | Protocadherin LKC                                                                                    |
| 904 | NM_017688 | BSPRY        | 14 | 7 | 0.0004481760 | B-box and SPRY domain containing                                                                     |
| 905 | NM_015685 | SDCBP2       | 16 | 7 | 0.0004528105 | Syndecan binding protein (syntenin) 2                                                                |
| 906 | NM_001226 | CASP6        | 19 | 8 | 0.0004547916 | Caspase 6, apoptosis-related cysteine protease                                                       |
| 907 | NM_006506 | RASA2        | 18 | 8 | 0.0004574176 | RAS p21 protein activator 2                                                                          |
| 908 | NM_020422 | LOC57146     | 18 | 8 | 0.0004577895 | Promethin                                                                                            |
| 909 | NM_013345 | GPR132       | 17 | 5 | 0.0004621572 | G protein-coupled receptor 132                                                                       |
| 910 | Z36835    | CLDN23       | 14 | 6 | 0.0004629194 | Claudin 23                                                                                           |
| 911 | NM_014297 | ETHE1        | 19 | 8 | 0.0004652177 | Ethylmalonic encephalopathy 1                                                                        |
| 912 | NM_015684 | ATP5S        | 19 | 6 | 0.0004656673 | ATP synthase, H <sup>+</sup> transporting, mitochondrial F0 complex, subunit s (factor B)            |
| 913 | NM_014939 | KIAA1012     | 19 | 6 | 0.0004677892 | Hypothetical protein LOC284242                                                                       |
| 914 | NM_016108 | AIG1         | 19 | 8 | 0.0004725408 | Androgen-induced 1                                                                                   |
| 915 | NM_017904 | FLJ20619     | 19 | 6 | 0.0004740095 | Hypothetical protein FLJ20619                                                                        |
| 916 | AF070582  | FLJ10996     | 19 | 8 | 0.0004746309 | Hypothetical protein FLJ10996                                                                        |
| 917 | NM_000424 | KRT5         | 18 | 7 | 0.0004774888 | Keratin 5 (epidermolysis bullosa simplex, Dowling-Meara/Kobner/Weber-Cockayne types)                 |
| 918 | NM_005234 | NR2F6        | 18 | 8 | 0.0004829183 | Nuclear receptor subfamily 2, group F, member 6                                                      |
| 919 | NM_012434 | SLC17A5      | 19 | 6 | 0.0004881310 | Solute carrier family 17 (anion/sugar transporter), member 5                                         |
| 920 | NM_004448 | ERBB2        | 18 | 8 | 0.0004896786 | V-erb-b2 erythroblastic leukemia viral oncogene homolog 2, neuro/glioblastoma derived oncogene homol |
| 921 | NM_006946 | SPTBN2       | 19 | 8 | 0.0004904824 | Spectrin, beta, non-erythrocytic 2                                                                   |
| 922 | NM_016346 | NR2E3        | 16 | 8 | 0.0004908654 | Nuclear receptor subfamily 2, group E, member 3                                                      |

|     |           |               |    |   |              |                                                                                                       |
|-----|-----------|---------------|----|---|--------------|-------------------------------------------------------------------------------------------------------|
| 923 | AF134401  | ESPN          | 15 | 7 | 0.0004912210 | Espin                                                                                                 |
| 924 | NM_002071 | GNAL          | 16 | 7 | 0.0004920889 | Guanine nucleotide binding protein (G protein), alpha activating activity polypeptide, olfactory type |
| 925 | NM_016559 | PEX5L         | 19 | 8 | 0.0004926741 | Peroxisomal biogenesis factor 5-like                                                                  |
| 926 | AF157323  | FBXL5         | 11 | 7 | 0.0004937337 | F-box and leucine-rich repeat protein 5                                                               |
| 927 | NM_001174 | ARHGAP6       | 19 | 8 | 0.0004937899 | Rho GTPase activating protein 6                                                                       |
| 928 | NM_012257 | HBP1          | 18 | 8 | 0.0004950155 | HMG-box transcription factor 1                                                                        |
| 929 | AL137376  | DKFZp434J0226 | 17 | 5 | 0.0004958000 | Hypothetical gene DKFZp434J0226                                                                       |
| 930 | NM_002342 | LTBR          | 19 | 8 | 0.0004984456 | Lymphotoxin beta receptor (TNFR superfamily, member 3)                                                |
| 931 | NM_014430 | CIDEB         | 19 | 7 | 0.0004990371 | Cell death-inducing DFFA-like effector b                                                              |
| 932 | AF143870  |               | 17 | 5 | 0.0005010511 | CDNA clone IMAGE:4615066                                                                              |
| 933 | M73239    | HGF           | 19 | 7 | 0.0005010858 | Hepatocyte growth factor (hepapoietin A; scatter factor)                                              |
| 934 | NM_012096 | APPL          | 19 | 8 | 0.0005043140 | Adaptor protein containing pH domain, PTB domain and leucine zipper motif 1                           |
| 935 | NM_004616 | TM4SF3        | 17 | 5 | 0.0005049135 | Tetraspanin 8                                                                                         |
| 936 | NM_014516 | CNOT3         | 18 | 8 | 0.0005073984 | CCR4-NOT transcription complex, subunit 3                                                             |
| 937 | NM_016123 | IRAK4         | 17 | 8 | 0.0005084709 | Interleukin-1 receptor-associated kinase 4                                                            |
| 938 | AK024476  | CTF18         | 18 | 8 | 0.0005089423 | CTF18, chromosome transmission fidelity factor 18 homolog (S. cerevisiae)                             |
| 939 | NM_003603 | ARGBP2        | 14 | 7 | 0.0005125292 | Arg/Abl-interacting protein ArgBP2                                                                    |
| 940 | NM_017733 | GPI7          | 19 | 7 | 0.0005195879 | GPI7 protein                                                                                          |
| 941 | S75264    | WT1           | 15 | 7 | 0.0005223548 | Wilms tumor 1                                                                                         |
| 942 | AF317425  | ANKRD12       | 18 | 8 | 0.0005240575 | Ankyrin repeat domain 12                                                                              |
| 943 | AF251025  | ZFYVE1        | 14 | 6 | 0.0005249079 | Zinc finger, FYVE domain containing 1                                                                 |
| 944 | AL110232  | TFEC          | 17 | 7 | 0.0005254753 | Transcription factor EC                                                                               |
| 945 | NM_006278 | SIAT4C        | 18 | 8 | 0.0005266552 | ST3 beta-galactoside alpha-2,3-sialyltransferase 4                                                    |
| 946 | NM_000895 | LTA4H         | 19 | 8 | 0.0005274056 | Leukotriene A4 hydrolase                                                                              |
| 947 | AK025015  | FLJ13955      | 17 | 8 | 0.0005278287 | NIPA-like domain containing 2                                                                         |
| 948 | AL365404  | GPR108        | 19 | 8 | 0.0005290669 | G protein-coupled receptor 108                                                                        |
| 949 | NM_016115 | ASB3          | 17 | 8 | 0.0005326998 | Ankyrin repeat and SOCS box-containing 3                                                              |
| 950 | AB011128  | KIAA0556      | 17 | 7 | 0.0005346805 | KIAA0556 protein                                                                                      |
| 951 | AF130101  | GNA13         | 19 | 6 | 0.0005356915 | Guanine nucleotide binding protein (G protein), alpha 13                                              |
| 952 | AF038564  | ITCH          | 19 | 8 | 0.0005369998 | Itchy homolog E3 ubiquitin protein ligase (mouse)                                                     |
| 953 | NM_017661 | SUHW4         | 19 | 8 | 0.0005392121 | Suppressor of hairy wing homolog 4 (Drosophila)                                                       |
| 954 | NM_017982 | FLJ10052      | 19 | 8 | 0.0005424723 | Sushi domain containing 4                                                                             |
| 955 | AF086120  | C4orf7        | 17 | 6 | 0.0005445794 | Chromosome 4 open reading frame 7                                                                     |

|     |           |               |    |   |              |                                                                       |
|-----|-----------|---------------|----|---|--------------|-----------------------------------------------------------------------|
| 956 | NM_017958 | PLEKHB2       | 14 | 7 | 0.0005454840 | Pleckstrin homology domain containing, family B (evectins) member 2   |
| 957 | NM_001942 | DSG1          | 14 | 7 | 0.0005469893 | Desmoglein 1                                                          |
| 958 | NM_001144 | AMFR          | 12 | 8 | 0.0005504084 | Autocrine motility factor receptor                                    |
| 959 | AF086366  | SPINT1        | 15 | 8 | 0.0005509073 | Serine protease inhibitor, Kunitz type 1                              |
| 960 | NM_003587 | DHX16         | 17 | 5 | 0.0005528473 | DEAH (Asp-Glu-Ala-His) box polypeptide 16                             |
| 961 | AL110135  | FLJ14753      | 19 | 6 | 0.0005529471 | Hippocampus abundant transcript-like 1                                |
| 962 | AL049280  | CYorf15B      | 14 | 6 | 0.0005535308 | Chromosome Y open reading frame 15B                                   |
| 963 | AB028989  | MAPK8IP3      | 18 | 7 | 0.0005548780 | Mitogen-activated protein kinase 8 interacting protein 3              |
| 964 | NM_003278 | TNA           | 17 | 8 | 0.0005563691 | C-type lectin domain family 3, member B                               |
| 965 | NM_000925 | PDHB          | 19 | 8 | 0.0005572543 | Pyruvate dehydrogenase (lipoamide) beta                               |
| 966 | NM_005705 | PHEMX         | 19 | 6 | 0.0005589372 | Pan-hematopoietic expression                                          |
| 967 | AJ000008  | PIK3C2G       | 18 | 8 | 0.0005589739 | Phosphoinositide-3-kinase, class 2, gamma polypeptide                 |
| 968 | NM_004251 | RAB9A         | 19 | 8 | 0.0005602642 | RAB9A, member RAS oncogene family                                     |
| 969 | NM_006032 | CPNE6         | 14 | 6 | 0.0005608030 | Copine VI (neuronal)                                                  |
| 970 | AF217504  | SENP7         | 18 | 8 | 0.0005621664 | SUMO1/sentrin specific protease 7                                     |
| 971 | NM_003002 | SDHD          | 19 | 8 | 0.0005632898 | Succinate dehydrogenase complex, subunit D, integral membrane protein |
| 972 | NM_014774 | KIAA0494      | 19 | 8 | 0.0005644205 | KIAA0494 gene product                                                 |
| 973 | AK026992  |               | 17 | 8 | 0.0005695337 | Data not found                                                        |
| 974 | AK021699  | ZNF556        | 19 | 8 | 0.0005771760 | Zinc finger protein 556                                               |
| 975 | NM_018840 | C20orf24      | 13 | 8 | 0.0005824525 | Chromosome 20 open reading frame 24                                   |
| 976 | NM_003974 | DOK2          | 17 | 7 | 0.0005845154 | Docking protein 2, 56kDa                                              |
| 977 | NM_003573 | LTBP4         | 19 | 8 | 0.0005874737 | Latent transforming growth factor beta binding protein 4              |
| 978 | Z36789    |               | 19 | 8 | 0.0005886758 | Data not found                                                        |
| 979 | U87460    |               | 19 | 7 | 0.0005909042 | Data not found                                                        |
| 980 | NM_020374 | C12orf4       | 18 | 7 | 0.0005930790 | Chromosome 12 open reading frame 4                                    |
| 981 | NM_020248 | CTNNBIP1      | 18 | 7 | 0.0005938079 | Catenin, beta interacting protein 1                                   |
| 982 | NM_006755 | TALDO1        | 19 | 8 | 0.0005945897 | Transaldolase 1                                                       |
| 983 | NM_000752 |               | 16 | 8 | 0.0005966031 | Data not found                                                        |
| 984 | NM_017720 | STAP2         | 16 | 8 | 0.0005982624 | Signal-transducing adaptor protein-2                                  |
| 985 | AJ011980  | LOC89231      | 10 | 5 | 0.0005984739 | Dpy-19-like 1 pseudogene 1 (C. elegans)                               |
| 986 | AB032987  |               | 18 | 6 | 0.0005995120 | Data not found                                                        |
| 987 | D16991    | DKFZP564G2022 | 18 | 8 | 0.0006009079 | DKFZP564G2022 protein                                                 |
| 988 | NM_004485 | GNG4          | 17 | 6 | 0.0006050574 | Hypothetical protein LOC200169                                        |

|      |           |           |    |   |              |                                                                                          |
|------|-----------|-----------|----|---|--------------|------------------------------------------------------------------------------------------|
| 989  | AF182218  | ALOXE3    | 17 | 7 | 0.0006066600 | Arachidonate lipoygenase 3                                                               |
| 990  | NM_005469 | PTE1      | 18 | 7 | 0.0006078657 | Peroxisomal acyl-CoA thioesterase                                                        |
| 991  | NM_002494 | NDUFC1    | 18 | 8 | 0.0006079148 | NADH dehydrogenase (ubiquinone) 1, subcomplex unknown, 1, 6kDa                           |
| 992  | NM_002837 | PTPRB     | 18 | 6 | 0.0006084229 | Protein tyrosine phosphatase, receptor type, B                                           |
| 993  | U83115    | AIM1      | 18 | 5 | 0.0006147873 | Absent in melanoma 1                                                                     |
| 994  | NM_016031 |           | 19 | 8 | 0.0006157646 | Data not found                                                                           |
| 995  | NM_000106 | CYP2D6    | 19 | 8 | 0.0006171494 | Cytochrome P450, family 2, subfamily D, polypeptide 6                                    |
| 996  | AB002336  | EPB41L1   | 19 | 8 | 0.0006199154 | Erythrocyte membrane protein band 4.1-like 1                                             |
| 997  | NM_005233 | EPHA3     | 19 | 8 | 0.0006210545 | EPH receptor A3                                                                          |
| 998  | NM_001128 | APIG1     | 19 | 7 | 0.0006246265 | Adaptor-related protein complex 1, gamma 1 subunit                                       |
| 999  | NM_002495 | NDUFS4    | 19 | 8 | 0.0006268633 | NADH dehydrogenase (ubiquinone) Fe-S protein 4, 18kDa (NADH-coenzyme Q reductase)        |
| 1000 | AK026795  | SCRN3     | 16 | 8 | 0.0006297566 | Secernin 3                                                                               |
| 1001 | NM_001512 | GSTA4     | 18 | 8 | 0.0006326437 | Glutathione S-transferase A4                                                             |
| 1002 | NM_003567 | BCAR3     | 19 | 8 | 0.0006339802 | Breast cancer anti-estrogen resistance 3                                                 |
| 1003 | AF045229  |           | 18 | 7 | 0.0006359554 | Data not found                                                                           |
| 1004 | AK026448  | FLJ22795  | 19 | 7 | 0.0006385183 | Hypothetical protein FLJ22795                                                            |
| 1005 | NM_000299 | PKP1      | 15 | 7 | 0.0006415565 | Plakophilin 1 (ectodermal dysplasia/skin fragility syndrome)                             |
| 1006 | J04474    | BCKDHA    | 18 | 7 | 0.0006428548 | Branched chain keto acid dehydrogenase E1, alpha polypeptide (maple syrup urine disease) |
| 1007 | AF186017  | RASGRF2   | 14 | 7 | 0.0006460189 | Ras protein-specific guanine nucleotide-releasing factor 2                               |
| 1008 | AL137595  |           | 16 | 8 | 0.0006470038 | LOC439997                                                                                |
| 1009 | AL390163  |           | 11 | 5 | 0.0006491940 | MRNA; cDNA DKFZp761M1216 (from clone DKFZp761M1216)                                      |
| 1010 | AL049378  | TNPO1     | 14 | 6 | 0.0006492914 | Transportin 1                                                                            |
| 1011 | AK026295  |           | 19 | 8 | 0.0006548990 | CDNA: FLJ22642 fis, clone HSI06970                                                       |
| 1012 | AF003737  | ITSN1     | 16 | 6 | 0.0006570450 | Intersectin 1 (SH3 domain protein)                                                       |
| 1013 | NM_001884 | HAPLN1    | 14 | 6 | 0.0006579162 | Hyaluronan and proteoglycan link protein 1                                               |
| 1014 | AF086090  | C20orf116 | 17 | 8 | 0.0006587368 | Chromosome 20 open reading frame 116                                                     |
| 1015 | AF007132  | ABHD5     | 17 | 7 | 0.0006598027 | Abhydrolase domain containing 5                                                          |
| 1016 | NM_016366 | CABP2     | 17 | 6 | 0.0006619646 | Calcium binding protein 2                                                                |
| 1017 | NM_002562 | P2RX7     | 13 | 6 | 0.0006626753 | Purinergic receptor P2X, ligand-gated ion channel, 7                                     |
| 1018 | AL137535  | C9orf3    | 19 | 7 | 0.0006658406 | Chromosome 9 open reading frame 3                                                        |
| 1019 | NM_004003 | CRAT      | 19 | 8 | 0.0006684621 | Carnitine acetyltransferase                                                              |
| 1020 | NM_016282 | AK3L1     | 19 | 8 | 0.0006706944 | Adenylate kinase 3                                                                       |
| 1021 | NM_004283 | RAB3D     | 17 | 6 | 0.0006718956 | RAB3D, member RAS oncogene family                                                        |

|      |           |              |    |   |              |                                                                                                         |
|------|-----------|--------------|----|---|--------------|---------------------------------------------------------------------------------------------------------|
| 1022 | AF182814  | MAT2B        | 19 | 8 | 0.0006731323 | Methionine adenosyltransferase II, beta                                                                 |
| 1023 | NM_000027 | AGA          | 18 | 8 | 0.0006732399 | Aspartylglucosaminidase                                                                                 |
| 1024 | AK000079  | MGC10854     | 17 | 8 | 0.0006749252 | Hypothetical protein MGC10854                                                                           |
| 1025 | NM_016117 |              | 18 | 8 | 0.0006755691 | Data not found                                                                                          |
| 1026 | AF169796  | RAD18        | 19 | 8 | 0.0006766550 | RAD18 homolog ( <i>S. cerevisiae</i> )                                                                  |
| 1027 | NM_015677 | SH3YL1       | 19 | 8 | 0.0006783486 | SH3 domain containing, Ysc84-like 1 ( <i>S. cerevisiae</i> )                                            |
| 1028 | AF261758  | DHCR24       | 17 | 8 | 0.0006794823 | 24-dehydrocholesterol reductase                                                                         |
| 1029 | NM_006215 | SERPINA4     | 18 | 8 | 0.0006839915 | Serine (or cysteine) proteinase inhibitor, clade A (alpha-1 antiproteinase, antitrypsin), member 4      |
| 1030 | AL080065  | DKFZP564J102 | 14 | 6 | 0.0006870760 | DKFZP564J102 protein                                                                                    |
| 1031 | X99663    |              | 19 | 7 | 0.0006878751 | SH3-domain GRB2-like pseudogene 3                                                                       |
| 1032 | AB018258  | ATP10B       | 17 | 8 | 0.0006936107 | ATPase, Class V, type 10B                                                                               |
| 1033 | NM_018002 |              | 19 | 7 | 0.0007004197 | Data not found                                                                                          |
| 1034 | AJ132086  | DNAH6        | 15 | 7 | 0.0007025318 | Dynein, axonemal, heavy polypeptide 6                                                                   |
| 1035 | NM_006672 | SLC22A7      | 18 | 7 | 0.0007056546 | Solute carrier family 22 (organic anion transporter), member 7                                          |
| 1036 | AK001843  | MGC39518     | 18 | 6 | 0.0007081505 | Hypothetical protein MGC39518                                                                           |
| 1037 | NM_014586 | HUNK         | 16 | 8 | 0.0007121602 | Hormonally upregulated Neu-associated kinase                                                            |
| 1038 | NM_016217 | HECA         | 15 | 8 | 0.0007161610 | Headcase homolog ( <i>Drosophila</i> )                                                                  |
| 1039 | NM_006663 | PPP1R13L     | 19 | 8 | 0.0007162769 | Protein phosphatase 1, regulatory (inhibitor) subunit 13 like                                           |
| 1040 | NM_017784 | OSBPL10      | 18 | 8 | 0.0007167248 | Oxysterol binding protein-like 10                                                                       |
| 1041 | AB032363  | ALK          | 13 | 5 | 0.0007189537 | Anaplastic lymphoma kinase (Ki-1)                                                                       |
| 1042 | NM_001757 | CBR1         | 19 | 8 | 0.0007193730 | Carbonyl reductase 1                                                                                    |
| 1043 | NM_014002 | IKBKE        | 18 | 8 | 0.0007215129 | Inhibitor of kappa light polypeptide gene enhancer in B-cells, kinase epsilon                           |
| 1044 | M74509    |              | 16 | 8 | 0.0007234790 | Data not found                                                                                          |
| 1045 | NM_020353 | PLSCR4       | 18 | 7 | 0.0007306364 | Phospholipid scramblase 4                                                                               |
| 1046 | NM_002590 | PCDH8        | 17 | 7 | 0.0007307022 | Protocadherin 8                                                                                         |
| 1047 | NM_004405 | DLX2         | 18 | 7 | 0.0007343472 | Distal-less homeo box 2                                                                                 |
| 1048 | X74864    | VENTX1       | 18 | 6 | 0.0007351894 | VENT-like homeobox 1                                                                                    |
| 1049 | NM_004449 | ERG          | 15 | 8 | 0.0007354962 | V-ets erythroblastosis virus E26 oncogene like (avian)                                                  |
| 1050 | NM_005470 | ABII         | 19 | 8 | 0.0007373650 | Abl-interactor 1                                                                                        |
| 1051 | NM_001978 | EPB49        | 19 | 7 | 0.0007384232 | Erythrocyte membrane protein band 4.9 (dematin)                                                         |
| 1052 | NM_013227 | AGC1         | 19 | 8 | 0.0007387209 | Aggrecan 1 (chondroitin sulfate proteoglycan 1, large aggregating proteoglycan, antigen identified by m |
| 1053 | NM_005561 | LAMP1        | 19 | 8 | 0.0007426924 | Lysosomal-associated membrane protein 1                                                                 |
| 1054 | NM_005603 | ATP8B1       | 16 | 7 | 0.0007444954 | ATPase, Class I, type 8B, member 1                                                                      |



|      |           |               |    |   |              |                                                                                       |
|------|-----------|---------------|----|---|--------------|---------------------------------------------------------------------------------------|
| 1055 | NM_018379 | FLJ11280      | 18 | 7 | 0.0007462159 | Family with sequence similarity 63, member A                                          |
| 1056 | NM_007246 | KLHL2         | 15 | 7 | 0.0007514738 | Kelch-like 2, Mayven (Drosophila)                                                     |
| 1057 | AL353933  | SLC22A15      | 14 | 5 | 0.0007535187 | Solute carrier family 22 (organic cation transporter), member 15                      |
| 1058 | AK023115  | NARG1         | 15 | 7 | 0.0007560392 | NMDA receptor regulated 1                                                             |
| 1059 | X89743    |               | 14 | 6 | 0.0007563074 | Data not found                                                                        |
| 1060 | NM_002238 | KCNH1         | 13 | 7 | 0.0007578517 | Potassium voltage-gated channel, subfamily H (eag-related), member 1                  |
| 1061 | AK025314  | GFM2          | 19 | 7 | 0.0007581731 | G elongation factor, mitochondrial 2                                                  |
| 1062 | NM_001730 | KLF5          | 19 | 8 | 0.0007584251 | Kruppel-like factor 5 (intestinal)                                                    |
| 1063 | AF192403  | ELTD1         | 18 | 5 | 0.0007596831 | EGF, latrophilin and seven transmembrane domain containing 1                          |
| 1064 | NM_017577 | DKFZp434C0328 | 17 | 8 | 0.0007602749 | Hypothetical protein DKFZp434C0328                                                    |
| 1065 | NM_006873 | ALF           | 15 | 7 | 0.0007634488 | TFIIA-alpha/beta-like factor                                                          |
| 1066 | NM_015320 | ARHGEF4       | 12 | 8 | 0.0007676054 | Rho guanine nucleotide exchange factor (GEF) 4                                        |
| 1067 | NM_000899 | KITLG         | 19 | 8 | 0.0007711096 | KIT ligand                                                                            |
| 1068 | AK023847  |               | 17 | 5 | 0.0007762247 | Data not found                                                                        |
| 1069 | NM_003015 | SFRP5         | 15 | 6 | 0.0007767416 | Secreted frizzled-related protein 5                                                   |
| 1070 | AK022677  | MPP5          | 19 | 8 | 0.0007774329 | Membrane protein, palmitoylated 5 (MAGUK p55 subfamily member 5)                      |
| 1071 | NM_007058 | CAPN11        | 19 | 8 | 0.0007784265 | Calpain 11                                                                            |
| 1072 | NM_000338 | SLC12A1       | 19 | 6 | 0.0007792934 | Solute carrier family 12 (sodium/potassium/chloride transporters), member 1           |
| 1073 | NM_001957 | EDNRA         | 18 | 8 | 0.0007795626 | Endothelin receptor type A                                                            |
| 1074 | NM_006136 | CAPZA2        | 19 | 8 | 0.0007864761 | Capping protein (actin filament) muscle Z-line, alpha 2                               |
| 1075 | AF097159  | B4GALT6       | 18 | 8 | 0.0007904692 | UDP-Gal:betaGlcNAc beta 1,4- galactosyltransferase, polypeptide 6                     |
| 1076 | AJ000095  | CBR3          | 15 | 6 | 0.0007906361 | Carbonyl reductase 3                                                                  |
| 1077 | NM_004163 | RAB27B        | 19 | 7 | 0.0007911098 | RAB27B, member RAS oncogene family                                                    |
| 1078 | AK022583  |               | 16 | 8 | 0.0007917008 | CDNA FLJ46713 fis, clone TRACH3016885                                                 |
| 1079 | NM_003986 | BBOX1         | 17 | 8 | 0.0007964551 | Butyrobetaine (gamma), 2-oxoglutarate dioxygenase (gamma-butyrobetaine hydroxylase) 1 |
| 1080 | AJ227863  | MBNL1         | 12 | 8 | 0.0008035366 | Muscleblind-like (Drosophila)                                                         |
| 1081 | NM_002450 |               | 19 | 8 | 0.0008073408 | Data not found                                                                        |
| 1082 | AF143872  |               | 17 | 6 | 0.0008080208 | Clone IMAGE:111714 mRNA sequence                                                      |
| 1083 | AF157562  | ELL           | 16 | 7 | 0.0008101394 | Elongation factor RNA polymerase II                                                   |
| 1084 | AK025140  | FLJ32421      | 12 | 8 | 0.0008130229 | Chromosome 1 open reading frame 58                                                    |
| 1085 | AF268872  | SELB          | 19 | 8 | 0.0008135192 | Eukaryotic elongation factor, selenocysteine-tRNA-specific                            |
| 1086 | AL122055  | CDC2L6        | 16 | 8 | 0.0008135415 | Cell division cycle 2-like 6 (CDK8-like)                                              |
| 1087 | NM_002476 | MYL4          | 19 | 6 | 0.0008161653 | Myosin, light polypeptide 4, alkali; atrial, embryonic                                |

|      |           |              |    |   |              |                                                                   |
|------|-----------|--------------|----|---|--------------|-------------------------------------------------------------------|
| 1088 | AK024908  | ASB8         | 17 | 8 | 0.0008161807 | Ankyrin repeat and SOCS box-containing 8                          |
| 1089 | NM_018069 | Cep192       | 15 | 8 | 0.0008164351 | Centrosomal protein 192 kDa                                       |
| 1090 | NM_006402 | HBXIP        | 19 | 8 | 0.0008168180 | Hepatitis B virus x interacting protein                           |
| 1091 | AL049263  | PSPC1        | 14 | 8 | 0.0008176430 | Paraspeckle component 1                                           |
| 1092 | NM_015981 | CAMK2A       | 15 | 7 | 0.0008185133 | Calcium/calmodulin-dependent protein kinase (CaM kinase) II alpha |
| 1093 | NM_019556 | MOSPD1       | 16 | 6 | 0.0008274941 | Motile sperm domain containing 1                                  |
| 1094 | NM_014181 | HSPC159      | 16 | 8 | 0.0008327166 | HSPC159 protein                                                   |
| 1095 | NM_006307 | SRPX         | 18 | 8 | 0.0008327441 | Sushi-repeat-containing protein, X-linked                         |
| 1096 | NM_001143 | AMELY        | 19 | 7 | 0.0008339826 | Amelogenin, Y-linked                                              |
| 1097 | AF086204  |              | 13 | 5 | 0.0008345604 | Hypothetical gene supported by AF086204                           |
| 1098 | AJ245433  | C6orf47      | 18 | 6 | 0.0008346520 | Chromosome 6 open reading frame 47                                |
| 1099 | NM_018340 | FLJ11151     | 15 | 5 | 0.0008347067 | Hypothetical protein FLJ11151                                     |
| 1100 | NM_003870 | IQGAP1       | 19 | 8 | 0.0008357885 | IQ motif containing GTPase activating protein 1                   |
| 1101 | NM_018184 | ARL10C       | 19 | 8 | 0.0008397161 | ADP-ribosylation factor-like 10C                                  |
| 1102 | NM_004244 | CD163        | 17 | 6 | 0.0008410668 | CD163 antigen                                                     |
| 1103 | NM_001278 | CHUK         | 19 | 8 | 0.0008439925 | Conserved helix-loop-helix ubiquitous kinase                      |
| 1104 | NM_007000 | UPK1A        | 17 | 8 | 0.0008457268 | Uroplakin 1A                                                      |
| 1105 | AB011146  | KIAA0574     | 19 | 8 | 0.0008458209 | KIAA0574 protein                                                  |
| 1106 | AL137554  | CDADC1       | 18 | 7 | 0.0008521856 | Cytidine and dCMP deaminase domain containing 1                   |
| 1107 | NM_004740 | TIAF1        | 19 | 8 | 0.0008530468 | TGFB1-induced anti-apoptotic factor 1                             |
| 1108 | NM_017943 | FBXO34       | 18 | 8 | 0.0008536001 | F-box protein 34                                                  |
| 1109 | AF070617  | DKFZP564D172 | 18 | 8 | 0.0008537843 | Hypothetical protein DKFZp564D172                                 |
| 1110 | AB029396  | B3GAT1       | 18 | 6 | 0.0008555060 | Beta-1,3-glucuronyltransferase 1 (glucuronosyltransferase P)      |
| 1111 | NM_004431 | EPHA2        | 19 | 8 | 0.0008566315 | EPH receptor A2                                                   |
| 1112 | AK026339  | MYO15B       | 16 | 8 | 0.0008598825 | Myosin XVb, pseudogene                                            |
| 1113 | U47635    | MTMR6        | 18 | 6 | 0.0008606936 | Myotubularin related protein 6                                    |
| 1114 | NM_016563 | RASL12       | 17 | 7 | 0.0008617879 | RAS-like, family 12                                               |
| 1115 | AK022262  | KBTBD9       | 14 | 5 | 0.0008654702 | Kelch repeat and BTB (POZ) domain containing 9                    |
| 1116 | NM_000079 | CHRNA1       | 15 | 8 | 0.0008662823 | Cholinergic receptor, nicotinic, alpha polypeptide 1 (muscle)     |
| 1117 | AK023556  | LAMA2        | 15 | 6 | 0.0008686166 | Laminin, alpha 2 (merosin, congenital muscular dystrophy)         |
| 1118 | NM_007167 | ZNF258       | 17 | 7 | 0.0008721152 | Zinc finger protein 258                                           |
| 1119 | NM_017438 | C21orf18     | 19 | 8 | 0.0008747323 | Chromosome 21 open reading frame 18                               |
| 1120 | NM_004734 | DCAMKL1      | 19 | 8 | 0.0008755596 | Doublecortin and CaM kinase-like 1                                |

|      |           |          |    |   |              |                                                                                                |
|------|-----------|----------|----|---|--------------|------------------------------------------------------------------------------------------------|
| 1121 | AK025086  | HBLD2    | 19 | 8 | 0.0008851203 | HESB like domain containing 2                                                                  |
| 1122 | U56725    |          | 19 | 7 | 0.0008855485 | Data not found                                                                                 |
| 1123 | NM_000112 | SLC26A2  | 17 | 8 | 0.0008884779 | Solute carrier family 26 (sulfate transporter), member 2                                       |
| 1124 | AB040880  | KIAA1447 | 14 | 7 | 0.0008885496 | KIAA1447 protein                                                                               |
| 1125 | NM_013982 | NRG2     | 17 | 8 | 0.0008977144 | Neuregulin 2                                                                                   |
| 1126 | AF201932  | FBXO8    | 17 | 7 | 0.0009013864 | F-box protein 8                                                                                |
| 1127 | NM_003635 | NDST2    | 19 | 7 | 0.0009064595 | N-deacetylase/N-sulfotransferase (heparan glucosaminyl) 2                                      |
| 1128 | NM_005220 | DLX3     | 15 | 6 | 0.0009076193 | Distal-less homeo box 3                                                                        |
| 1129 | AK023701  | FLJ13639 | 18 | 7 | 0.0009124970 | Hypothetical protein FLJ13639                                                                  |
| 1130 | NM_003022 | SH3BGR1  | 19 | 8 | 0.0009237024 | SH3 domain binding glutamic acid-rich protein like                                             |
| 1131 | NM_016308 | UMP-CMPK | 17 | 8 | 0.0009276770 | Cytidylate kinase                                                                              |
| 1132 | NM_003662 | PIR      | 19 | 8 | 0.0009356722 | Pirin (iron-binding nuclear protein)                                                           |
| 1133 | AK024863  | DNCL12   | 18 | 8 | 0.0009365494 | Dynein, cytoplasmic, light intermediate polypeptide 2                                          |
| 1134 | NM_000017 | ACADS    | 18 | 7 | 0.0009383535 | Acyl-Coenzyme A dehydrogenase, C-2 to C-3 short chain                                          |
| 1135 | AJ245539  | GALNT5   | 16 | 8 | 0.0009458028 | UDP-N-acetyl-alpha-D-galactosamine:polypeptide N-acetylgalactosaminyltransferase 5 (GalNAc-T5) |
| 1136 | NM_003884 | PCAF     | 19 | 8 | 0.0009511011 | P300/CBP-associated factor                                                                     |
| 1137 | NM_016201 | AMOTL2   | 19 | 8 | 0.0009513736 | Angiomotin like 2                                                                              |
| 1138 | NM_004832 | GSTO1    | 19 | 5 | 0.0009526035 | Glutathione S-transferase omega 1                                                              |
| 1139 | NM_000681 | ADRA2A   | 12 | 6 | 0.0009526160 | Adrenergic, alpha-2A-, receptor                                                                |
| 1140 | NM_018281 | ECHDC2   | 18 | 7 | 0.0009578906 | Enoyl Coenzyme A hydratase domain containing 2                                                 |
| 1141 | NM_016598 | ZDHHC3   | 18 | 8 | 0.0009593635 | Zinc finger, DHHC-type containing 3                                                            |
| 1142 | AF085885  | IMPG1    | 18 | 7 | 0.0009612614 | Interphotoreceptor matrix proteoglycan 1                                                       |
| 1143 | AK022083  | FLJ12750 | 14 | 5 | 0.0009671584 | Hypothetical protein FLJ12750                                                                  |
| 1144 | AL122100  | LOC93463 | 16 | 8 | 0.0009693233 | Hypothetical protein LOC93463                                                                  |
| 1145 | NM_000954 | PTGDS    | 15 | 6 | 0.0009710009 | Prostaglandin D2 synthase 21kDa (brain)                                                        |
| 1146 | NM_004039 | ANXA2    | 19 | 8 | 0.0009712965 | Annexin A2                                                                                     |
| 1147 | AF087987  | MDGA1    | 15 | 6 | 0.0009749400 | MAM domain containing glycosylphosphatidylinositol anchor 1                                    |
| 1148 | AK025837  | FLJ22184 | 14 | 7 | 0.0009768251 | Hypothetical protein FLJ22184                                                                  |
| 1149 | NM_006471 | MRCL3    | 19 | 8 | 0.0009804700 | Myosin regulatory light chain MRCL3                                                            |
| 1150 | NM_001991 | EZH1     | 16 | 8 | 0.0009806196 | Enhancer of zeste homolog 1 (Drosophila)                                                       |
| 1151 | Y11312    | PIK3C2B  | 18 | 8 | 0.0009830625 | Phosphoinositide-3-kinase, class 2, beta polypeptide                                           |
| 1152 | AF052120  | FLJ43806 | 19 | 8 | 0.0009920697 | Hypothetical protein FLJ43806                                                                  |
| 1153 | L40402    | NEK9     | 15 | 6 | 0.0009921273 | NIMA (never in mitosis gene a)- related kinase 9                                               |

|      |           |           |    |   |              |                                                                                        |
|------|-----------|-----------|----|---|--------------|----------------------------------------------------------------------------------------|
| 1154 | U79275    | HSU79275  | 13 | 8 | 0.0009929985 | Hypothetical protein HSU79275                                                          |
| 1155 | NM_016140 | CGI-38    | 17 | 7 | 0.0009953132 | Brain specific protein                                                                 |
| 1156 | NM_014315 | KLHDC2    | 19 | 8 | 0.0010008330 | Kelch domain containing 2                                                              |
| 1157 | NM_013957 | NRG1      | 17 | 7 | 0.0010194093 | Neuregulin 1                                                                           |
| 1158 | NM_017845 | COMMD8    | 16 | 8 | 0.0010294726 | COMM domain containing 8                                                               |
| 1159 | NM_003667 | LGR5      | 9  | 5 | 0.0010342568 | Leucine-rich repeat-containing G protein-coupled receptor 5                            |
| 1160 | AK021958  | NARG2     | 19 | 8 | 0.0010352690 | NMDA receptor regulated 2                                                              |
| 1161 | NM_014631 | SH3MD1    | 17 | 8 | 0.0010414594 | SH3 multiple domains 1                                                                 |
| 1162 | NM_016060 | MED31     | 19 | 7 | 0.0010428574 | Mediator of RNA polymerase II transcription, subunit 31 homolog (yeast)                |
| 1163 | AF086027  |           | 16 | 6 | 0.0010437601 | Full length insert cDNA clone YW24B11                                                  |
| 1164 | NM_004115 | FGF14     | 11 | 8 | 0.0010497912 | Fibroblast growth factor 14                                                            |
| 1165 | NM_015993 | TM4SF11   | 19 | 8 | 0.0010501310 | Plasma membrane proteolipid (plasmolipin)                                              |
| 1166 | U94384    |           | 18 | 7 | 0.0010543820 | Y chromosome spermatogenesis candidate protein (RBM) pseudogene                        |
| 1167 | NM_016500 | CXorf26   | 18 | 7 | 0.0010569480 | Chromosome X open reading frame 26                                                     |
| 1168 | AF086262  | LOC162967 | 10 | 5 | 0.0010575935 | Zinc finger protein like                                                               |
| 1169 | AB028949  |           | 17 | 8 | 0.0010640108 | Data not found                                                                         |
| 1170 | NM_018844 | BCAP29    | 19 | 8 | 0.0010737634 | B-cell receptor-associated protein 29                                                  |
| 1171 | AL162053  | FBXO3     | 17 | 8 | 0.0010757268 | F-box protein 3                                                                        |
| 1172 | AF086367  |           | 14 | 6 | 0.0010786863 | Full length insert cDNA clone ZD66F04                                                  |
| 1173 | AF131787  |           | 17 | 5 | 0.0010862801 | CDNA clone IMAGE:4820713                                                               |
| 1174 | NM_001649 | APXL      | 18 | 7 | 0.0010891765 | Apical protein-like ( <i>Xenopus laevis</i> )                                          |
| 1175 | NM_012243 | SLC35A3   | 19 | 8 | 0.0010901518 | Solute carrier family 35 (UDP-N-acetylglucosamine (UDP-GlcNAc) transporter), member A3 |
| 1176 | NM_005858 | AKAP8     | 17 | 8 | 0.0010902334 | A kinase (PRKA) anchor protein 8                                                       |
| 1177 | NM_012289 | KEAP1     | 19 | 8 | 0.0011037066 | Kelch-like ECH-associated protein 1                                                    |
| 1178 | AF147346  | ARID1B    | 15 | 6 | 0.0011043977 | AT rich interactive domain 1B (SWI1-like)                                              |
| 1179 | AK021715  | DDX6      | 18 | 8 | 0.0011116489 | DEAD (Asp-Glu-Ala-Asp) box polypeptide 6                                               |
| 1180 | NM_018199 | C14orf114 | 17 | 6 | 0.0011164825 | Chromosome 14 open reading frame 114                                                   |
| 1181 | NM_004479 | FUT7      | 19 | 6 | 0.0011183148 | Fucosyltransferase 7 (alpha (1,3) fucosyltransferase)                                  |
| 1182 | AB011542  | EGFL5     | 17 | 7 | 0.0011279747 | EGF-like-domain, multiple 5                                                            |
| 1183 | AF170935  | RAB1A     | 19 | 8 | 0.0011284792 | RAB1A, member RAS oncogene family                                                      |
| 1184 | U96113    | WWP1      | 19 | 8 | 0.0011291880 | WW domain containing E3 ubiquitin protein ligase 1                                     |
| 1185 | AF116702  |           | 19 | 8 | 0.0011323787 | Data not found                                                                         |
| 1186 | L37699    |           | 19 | 8 | 0.0011344710 | Similar to hypothetical gene supported by BC031617                                     |

|      |           |          |    |   |              |                                                                             |
|------|-----------|----------|----|---|--------------|-----------------------------------------------------------------------------|
| 1187 | AL359055  |          | 18 | 7 | 0.0011345291 | MRNA full length insert cDNA clone EUROIMAGE 2344436                        |
| 1188 | NM_018417 | SAC      | 12 | 5 | 0.0011403254 | Testicular soluble adenylyl cyclase                                         |
| 1189 | NM_014432 | IL20RA   | 17 | 8 | 0.0011406070 | Interleukin 20 receptor, alpha                                              |
| 1190 | NM_012407 | PRKCABP  | 19 | 7 | 0.0011410649 | Protein kinase C, alpha binding protein                                     |
| 1191 | NM_002079 | GOT1     | 19 | 8 | 0.0011464888 | Glutamic-oxaloacetic transaminase 1, soluble (aspartate aminotransferase 1) |
| 1192 | AK021474  |          | 15 | 6 | 0.0011494351 | Data not found                                                              |
| 1193 | D42047    | GPD1L    | 19 | 8 | 0.0011495326 | Glycerol-3-phosphate dehydrogenase 1-like                                   |
| 1194 | NM_020134 | DPYSL5   | 14 | 6 | 0.0011513561 | Dihydropyrimidinase-like 5                                                  |
| 1195 | NM_013391 | DMGDH    | 10 | 5 | 0.0011549203 | Dimethylglycine dehydrogenase                                               |
| 1196 | NM_004055 | CAPN5    | 14 | 7 | 0.0011556662 | Calpain 5                                                                   |
| 1197 | NM_002087 | GRN      | 18 | 8 | 0.0011578944 | Granulin                                                                    |
| 1198 | NM_006498 | LGALS2   | 17 | 8 | 0.0011615537 | Lectin, galactoside-binding, soluble, 2 (galectin 2)                        |
| 1199 | NM_004963 | GUCY2C   | 17 | 8 | 0.0011659680 | Guanylate cyclase 2C (heat stable enterotoxin receptor)                     |
| 1200 | NM_014278 | HSPA4L   | 17 | 8 | 0.0011675912 | Heat shock 70kDa protein 4-like                                             |
| 1201 | NM_000300 | PLA2G2A  | 16 | 7 | 0.0011687718 | Phospholipase A2, group IIA (platelets, synovial fluid)                     |
| 1202 | NM_002409 | MGAT3    | 14 | 6 | 0.0011729093 | Mannosyl (beta-1,4-)-glycoprotein beta-1,4-N-acetylglucosaminyltransferase  |
| 1203 | U23860    | TNRC6A   | 15 | 6 | 0.0011738802 | Trinucleotide repeat containing 6A                                          |
| 1204 | NM_018287 | ARHGAP12 | 18 | 8 | 0.0011793040 | Rho GTPase activating protein 12                                            |
| 1205 | NM_020412 | CHMP1.5  | 19 | 8 | 0.0011811668 | Chromatin modifying protein 1B                                              |
| 1206 | AL117573  | C3orf17  | 19 | 8 | 0.0011822516 | Chromosome 3 open reading frame 17                                          |
| 1207 | NM_018980 | TAS2R5   | 11 | 6 | 0.0011825073 | Taste receptor, type 2, member 5                                            |
| 1208 | AK024489  | KIAA1443 | 19 | 8 | 0.0011905436 | KIAA1443                                                                    |
| 1209 | S67154    | EIF4A2   | 10 | 5 | 0.0011923646 | Eukaryotic translation initiation factor 4A, isoform 2                      |
| 1210 | NM_017606 |          | 19 | 7 | 0.0011948167 | Data not found                                                              |
| 1211 | NM_000422 | KRT17    | 19 | 8 | 0.0011959575 | Keratin 17                                                                  |
| 1212 | NM_000835 | GRIN2C   | 17 | 8 | 0.0011969806 | Glutamate receptor, ionotropic, N-methyl D-aspartate 2C                     |
| 1213 | AL080078  | TMEM30B  | 18 | 8 | 0.0012055026 | Transmembrane protein 30B                                                   |
| 1214 | U84508    | ARVCF    | 15 | 5 | 0.0012068643 | Armadillo repeat gene deletes in velocardiofacial syndrome                  |
| 1215 | NM_000764 | CYP2A7   | 19 | 8 | 0.0012096439 | Cytochrome P450, family 2, subfamily A, polypeptide 7 pseudogene 1          |
| 1216 | NM_001815 | CEACAM3  | 16 | 7 | 0.0012152010 | Carcinoembryonic antigen-related cell adhesion molecule 3                   |
| 1217 | AB037820  | MARCH-IV | 19 | 7 | 0.0012197785 | Membrane-associated ring finger (C3HC4) 4                                   |
| 1218 | NM_019049 | FLJ20054 | 19 | 8 | 0.0012204160 | Hypothetical protein FLJ20054                                               |
| 1219 | AF217187  | PPA2     | 19 | 8 | 0.0012260337 | Inorganic pyrophosphatase 2                                                 |

|      |           |           |    |   |              |                                                                                              |
|------|-----------|-----------|----|---|--------------|----------------------------------------------------------------------------------------------|
| 1220 | NM_003253 | TIAM1     | 19 | 8 | 0.0012261516 | T-cell lymphoma invasion and metastasis 1                                                    |
| 1221 | AF147344  | SSBP2     | 17 | 6 | 0.0012264295 | Single-stranded DNA binding protein 2                                                        |
| 1222 | AB032971  | TMCC3     | 19 | 7 | 0.0012297340 | Transmembrane and coiled-coil domain family 3                                                |
| 1223 | NM_002822 | PTK9      | 19 | 8 | 0.0012300772 | PTK9 protein tyrosine kinase 9                                                               |
| 1224 | L07394    | NY-SAR-41 | 15 | 8 | 0.0012436313 | Coiled-coil domain containing 18                                                             |
| 1225 | AL049801  | STARD13   | 18 | 8 | 0.0012492312 | START domain containing 13                                                                   |
| 1226 | NM_006264 | PTPN13    | 16 | 8 | 0.0012499338 | Protein tyrosine phosphatase, non-receptor type 13 (APO-1/CD95 (Fas)-associated phosphatase) |
| 1227 | AK027120  | FLJ23467  | 17 | 5 | 0.0012523143 | Tumor necrosis factor, alpha-induced protein 8-like 2                                        |
| 1228 | NM_006754 | SYPL      | 15 | 8 | 0.0012547902 | Synaptophysin-like 1                                                                         |
| 1229 | Z11773    | ZNF187    | 18 | 8 | 0.0012575687 | Zinc finger protein 187                                                                      |
| 1230 | NM_019854 | HRMT1L4   | 14 | 8 | 0.0012613515 | HMT1 hnRNP methyltransferase-like 4 ( <i>S. cerevisiae</i> )                                 |
| 1231 | NM_018464 | C10orf70  | 18 | 8 | 0.0012615546 | Chromosome 10 open reading frame 70                                                          |
| 1232 | AK025681  | FLJ22028  | 16 | 7 | 0.0012639870 | Hypothetical protein FLJ22028                                                                |
| 1233 | NM_002926 | RGS12     | 18 | 7 | 0.0012646772 | Regulator of G-protein signalling 12                                                         |
| 1234 | NM_001125 | ADPRH     | 19 | 6 | 0.0012674385 | ADP-ribosylarginine hydrolase                                                                |
| 1235 | AL133570  |           | 17 | 7 | 0.0012674573 | MRNA; cDNA DKFZp434L201 (from clone DKFZp434L201)                                            |
| 1236 | NM_002363 | MAGEB1    | 16 | 7 | 0.0012744734 | Melanoma antigen family B, 1                                                                 |
| 1237 | D38549    | CYFIP1    | 19 | 8 | 0.0012771250 | Cytoplasmic FMR1 interacting protein 1                                                       |
| 1238 | NM_006344 | CLECSF14  | 16 | 7 | 0.0012849808 | C-type lectin domain family 10, member A                                                     |
| 1239 | NM_012216 | MID2      | 15 | 7 | 0.0012867477 | Midline 2                                                                                    |
| 1240 | U22172    |           | 19 | 8 | 0.0012974202 | DNA damage repair and recombination protein RAD52 pseudogene                                 |
| 1241 | NM_006890 | CEACAM7   | 16 | 8 | 0.0013004358 | Carcinoembryonic antigen-related cell adhesion molecule 7                                    |
| 1242 | AL137692  | INADL     | 15 | 8 | 0.0013030482 | InaD-like ( <i>Drosophila</i> )                                                              |
| 1243 | AK023755  | TREML2    | 10 | 5 | 0.0013091360 | Triggering receptor expressed on myeloid cells-like 2                                        |
| 1244 | NM_005510 | DOM3Z     | 15 | 8 | 0.0013101174 | Dom-3 homolog Z ( <i>C. elegans</i> )                                                        |
| 1245 | U39573    | LPO       | 18 | 8 | 0.0013137070 | Lactoperoxidase                                                                              |
| 1246 | NM_004180 | TANK      | 19 | 8 | 0.0013150117 | TRAF family member-associated NFkB activator                                                 |
| 1247 | NM_014715 | RICS      | 12 | 8 | 0.0013180947 | Rho GTPase-activating protein                                                                |
| 1248 | NM_017901 | TPCN1     | 19 | 6 | 0.0013192794 | Two pore segment channel 1                                                                   |
| 1249 | NM_005605 | PPP3CC    | 19 | 8 | 0.0013224500 | Protein phosphatase 3 (formerly 2B), catalytic subunit, gamma isoform (calcineurin A gamma)  |
| 1250 | AK022194  | GPR157    | 16 | 8 | 0.0013314583 | G protein-coupled receptor 157                                                               |
| 1251 | NM_006065 | SIRPB1    | 13 | 6 | 0.0013337620 | Signal-regulatory protein beta 1                                                             |
| 1252 | AK026119  |           | 10 | 7 | 0.0013373255 | CDNA: FLJ22466 fis, clone HRC10308                                                           |

|      |           |           |    |   |              |                                                                 |
|------|-----------|-----------|----|---|--------------|-----------------------------------------------------------------|
| 1253 | U84517    | DGCR14    | 14 | 5 | 0.0013376854 | DiGeorge syndrome critical region gene 13                       |
| 1254 | NM_004924 | ACTN4     | 18 | 8 | 0.0013417672 | Actinin, alpha 4                                                |
| 1255 | NM_001173 | ARHGAP5   | 17 | 7 | 0.0013425313 | Rho GTPase activating protein 5                                 |
| 1256 | AB029021  | TRIM35    | 13 | 8 | 0.0013570065 | Tripartite motif-containing 35                                  |
| 1257 | AB037727  | CASKIN1   | 16 | 8 | 0.0013590175 | CASK interacting protein 1                                      |
| 1258 | AF085969  | C9orf85   | 11 | 6 | 0.0013592836 | Chromosome 9 open reading frame 85                              |
| 1259 | NM_005303 | GPR40     | 12 | 7 | 0.0013594144 | G protein-coupled receptor 40                                   |
| 1260 | AK025211  |           | 19 | 8 | 0.0013602908 | Data not found                                                  |
| 1261 | NM_001323 | CST6      | 17 | 8 | 0.0013602986 | Cystatin E/M                                                    |
| 1262 | NM_003580 | NSMAF     | 17 | 8 | 0.0013613546 | Neutral sphingomyelinase (N-SMase) activation associated factor |
| 1263 | AK023902  | FLJ13840  | 19 | 8 | 0.0013630569 | KIAA1822-like                                                   |
| 1264 | AK023079  |           | 18 | 8 | 0.0013784013 | CDNA FLJ12051 fis, clone HEMBB1002005                           |
| 1265 | NM_003664 | AP3B1     | 19 | 8 | 0.0013791462 | Adaptor-related protein complex 3, beta 1 subunit               |
| 1266 | NM_003746 | DNCL1     | 19 | 8 | 0.0013836556 | Dynein, cytoplasmic, light polypeptide 1                        |
| 1267 | NM_000061 | BTK       | 16 | 8 | 0.0013836746 | Bruton agammaglobulinemia tyrosine kinase                       |
| 1268 | NM_003590 | CUL3      | 19 | 8 | 0.0013841890 | Cullin 3                                                        |
| 1269 | Y11718    |           | 13 | 5 | 0.0013851095 | Data not found                                                  |
| 1270 | AB040938  | KIAA1505  | 18 | 8 | 0.0013855336 | KIAA1505 protein                                                |
| 1271 | AK021716  | FAM11B    | 18 | 8 | 0.0013893536 | Family with sequence similarity 11, member B                    |
| 1272 | NM_014007 | ZNF297B   | 19 | 8 | 0.0013897634 | Zinc finger protein 297B                                        |
| 1273 | AK026654  | CYBRD1    | 19 | 7 | 0.0013914792 | Cytochrome b reductase 1                                        |
| 1274 | NM_005036 | PPARA     | 19 | 8 | 0.0013941510 | Peroxisome proliferative activated receptor, alpha              |
| 1275 | U79300    |           | 17 | 5 | 0.0013945803 | Clone 23629 mRNA sequence                                       |
| 1276 | NM_018229 | C14orf108 | 19 | 8 | 0.0013960514 | Chromosome 14 open reading frame 108                            |
| 1277 | NM_014074 |           | 18 | 7 | 0.0014033608 | Data not found                                                  |
| 1278 | AL050371  | PISD      | 19 | 8 | 0.0014077319 | Phosphatidylserine decarboxylase                                |
| 1279 | U50342    | IGKC      | 14 | 7 | 0.0014120386 | Immunoglobulin kappa constant                                   |
| 1280 | NM_016278 |           | 19 | 6 | 0.0014167717 | Data not found                                                  |
| 1281 | NM_014408 | TRAPPC3   | 19 | 8 | 0.0014184097 | Trafficking protein particle complex 3                          |
| 1282 | NM_007064 | HAPIP     | 18 | 8 | 0.0014227686 | Kalirin, RhoGEF kinase                                          |
| 1283 | NM_001955 | EDN1      | 15 | 8 | 0.0014257552 | Endothelin 1                                                    |
| 1284 | AL133050  | KIAA1713  | 17 | 5 | 0.0014316278 | KIAA1713                                                        |
| 1285 | NM_004658 | RASAL1    | 13 | 8 | 0.0014362995 | RAS protein activator like 1 (GAP1 like)                        |

|      |           |          |           |   |              |                                                                                                      |
|------|-----------|----------|-----------|---|--------------|------------------------------------------------------------------------------------------------------|
| 1286 | AK024187  | THRAP3   | 15        | 5 | 0.0014366157 | Thyroid hormone receptor associated protein 3                                                        |
| 1287 | AK023810  | MGC4796  | 12        | 5 | 0.0014390019 | Serine/threonine kinase 40                                                                           |
| 1288 | NM_014183 | DNCL2A   | 11        | 7 | 0.0014397364 | Dynein, cytoplasmic, light polypeptide 2A                                                            |
| 1289 | AF241534  | PLAGL1   | 18        | 6 | 0.0014442501 | Pleiomorphic adenoma gene-like 1                                                                     |
| 1290 | AK021888  |          | 18        | 8 | 0.0014575797 | CDNA FLJ35001 fis, clone OCBBF2011887                                                                |
| 1291 | NM_005061 | RPL3L    | 19        | 8 | 0.0014578783 | Ribosomal protein L3-like                                                                            |
| 1292 | AL049334  | KIAA1982 | 16        | 6 | 0.0014582357 | KIAA1982 protein                                                                                     |
| 1293 | NM_000844 | GRM7     | 11        | 7 | 0.0014625589 | Glutamate receptor, metabotropic 7                                                                   |
| 1294 | NM_014619 | GRIK4    | 12        | 7 | 0.0014657839 | Glutamate receptor, ionotropic, kainate 4                                                            |
| 1295 | AK000063  | OTOP2    | 17        | 7 | 0.0014699518 | Otopetrin 2                                                                                          |
| 1296 | NM_018502 | PRO1580  | 16        | 7 | 0.0014718200 | Hypothetical protein PRO1580                                                                         |
| 1297 | NM_006764 | IFRD2    | 17        | 8 | 0.0014740520 | Interferon-related developmental regulator 2                                                         |
| 1298 | AK024160  | ZNF431   | 13        | 6 | 0.0014820375 | Zinc finger protein 431                                                                              |
| 1299 | AK001089  |          | 8         | 6 | 0.0014829828 | CDNA FLJ10227 fis, clone HEMBB1000103                                                                |
| 1300 | AK022820  | FAM33A   | 19        | 5 | 0.0014838633 | Family with sequence similarity 33, member A                                                         |
| 1301 | AL117520  |          | 15        | 5 | 0.0014848436 | MRNA; cDNA DKFZp434P2435 (from clone DKFZp434P2435)                                                  |
| 1302 | NM_000706 | AVPR1A   | 14        | 6 | 0.0014890271 | Arginine vasopressin receptor 1A                                                                     |
| 1303 | AF179995  |          | 08-Sep 18 | 8 | 0.0014909508 | Septin 8                                                                                             |
| 1304 | NM_002880 | RAF1     | 19        | 7 | 0.0014924011 | V-raf-1 murine leukemia viral oncogene homolog 1                                                     |
| 1305 | NM_006223 | PIN4     | 19        | 7 | 0.0014947121 | Protein (peptidyl-prolyl cis/trans isomerase) NIMA-interacting, 4 (parvulin)                         |
| 1306 | NM_005771 | DHRS9    | 16        | 6 | 0.0014959709 | Dehydrogenase/reductase (SDR family) member 9                                                        |
| 1307 | AF116705  |          | 19        | 8 | 0.0014977584 | Data not found                                                                                       |
| 1308 | NM_001612 | ACRV1    | 18        | 8 | 0.0015019486 | Acrosomal vesicle protein 1                                                                          |
| 1309 | AK026655  | NLN      | 13        | 5 | 0.0015035720 | Neurolysin (metallopeptidase M3 family)                                                              |
| 1310 | AK022185  | PRKCH    | 15        | 6 | 0.0015136267 | Protein kinase C, eta                                                                                |
| 1311 | NM_002961 | S100A4   | 19        | 8 | 0.0015162415 | S100 calcium binding protein A4 (calcium protein, calvasculin, metastasin, murine placental homolog) |
| 1312 | AK000106  | EGFR     | 17        | 8 | 0.0015171390 | Epidermal growth factor receptor (erythroblastic leukemia viral (v-erb-b) oncogene homolog, avian)   |
| 1313 | AK023471  | ZCCHC6   | 18        | 8 | 0.0015176933 | Zinc finger, CCHC domain containing 6                                                                |
| 1314 | AK023708  | FLJ13646 | 17        | 8 | 0.0015209166 | Hypothetical protein FLJ13646                                                                        |
| 1315 | NM_005986 | SOX1     | 19        | 8 | 0.0015278824 | SRY (sex determining region Y)-box 1                                                                 |
| 1316 | NM_001233 | CAV2     | 19        | 8 | 0.0015284404 | Caveolin 2                                                                                           |
| 1317 | NM_004167 | CCL14    | 19        | 8 | 0.0015349234 | Chemokine (C-C motif) ligand 15                                                                      |
| 1318 | X95095    | PDGFRA   | 17        | 7 | 0.0015373314 | Platelet-derived growth factor receptor, alpha polypeptide                                           |



|      |           |           |        |    |              |                                                                                                    |           |
|------|-----------|-----------|--------|----|--------------|----------------------------------------------------------------------------------------------------|-----------|
| 1319 | AL049351  | SEC8L1    | 15     | 7  | 0.0015374278 | SEC8-like 1 ( <i>S. cerevisiae</i> )                                                               |           |
| 1320 | NM_006952 | UPK1B     | 15     | 6  | 0.0015592543 | Uroplakin 1B                                                                                       |           |
| 1321 | NM_007084 | SOX21     | 19     | 8  | 0.0015633677 | SRY (sex determining region Y)-box 21                                                              |           |
| 1322 | D63487    | KIAA0153  | 14     | 8  | 0.0015733637 | KIAA0153 protein                                                                                   |           |
| 1323 | NM_004872 | C1orf8    | 19     | 8  | 0.0015755182 | Transmembrane protein 59                                                                           |           |
| 1324 | AF146760  |           | 10-Sep | 19 | 8            | 0.0015827268                                                                                       | Septin 10 |
| 1325 | AF308802  | VPS18     | 17     | 8  | 0.0015919331 | Vacuolar protein sorting protein 18                                                                |           |
| 1326 | AB002369  | MTMR3     | 18     | 8  | 0.0015919541 | Myotubularin related protein 3                                                                     |           |
| 1327 | NM_016087 | WNT16     | 14     | 7  | 0.0015965623 | Wingless-type MMTV integration site family, member 16                                              |           |
| 1328 | NM_006504 | PTPRE     | 14     | 7  | 0.0016020679 | Protein tyrosine phosphatase, receptor type, E                                                     |           |
| 1329 | NM_000418 | IL4R      | 17     | 8  | 0.0016025320 | Interleukin 4 receptor                                                                             |           |
| 1330 | NM_002990 | CCL22     | 19     | 6  | 0.0016071700 | Chemokine (C-C motif) ligand 22                                                                    |           |
| 1331 | AB023227  | DNMBP     | 16     | 6  | 0.0016093470 | Dynamin binding protein                                                                            |           |
| 1332 | NM_000167 | GK        | 15     | 8  | 0.0016126099 | Glycerol kinase                                                                                    |           |
| 1333 | NM_004851 | NAPSA     | 16     | 8  | 0.0016136007 | Napsin A aspartic peptidase                                                                        |           |
| 1334 | AK001546  | LOC202347 | 18     | 8  | 0.0016166145 | Hypothetical protein LOC202347                                                                     |           |
| 1335 | NM_017891 | FLJ20584  | 18     | 8  | 0.0016199804 | Chromosome 1 open reading frame 159                                                                |           |
| 1336 | AF146277  | CD2AP     | 19     | 8  | 0.0016240047 | CD2-associated protein                                                                             |           |
| 1337 | AK024134  | PPM1H     | 15     | 7  | 0.0016249661 | Protein phosphatase 1H (PP2C domain containing)                                                    |           |
| 1338 | NM_001099 | ACPP      | 17     | 6  | 0.0016253844 | Acid phosphatase, prostate                                                                         |           |
| 1339 | NM_017824 | RNF153    | 19     | 8  | 0.0016268789 | Membrane-associated ring finger (C3HC4) 5                                                          |           |
| 1340 | NM_006816 | LMAN2     | 19     | 8  | 0.0016452964 | Lectin, mannose-binding 2                                                                          |           |
| 1341 | AF024702  | ZNF445    | 18     | 7  | 0.0016519838 | Zinc finger protein 445                                                                            |           |
| 1342 | AB032969  | KIAA1143  | 19     | 8  | 0.0016541006 | KIAA1143                                                                                           |           |
| 1343 | X74497    | THRB      | 15     | 8  | 0.0016563627 | Thyroid hormone receptor, beta (erythroblastic leukemia viral (v-erb-a) oncogene homolog 2, avian) |           |
| 1344 | AK022845  | C9orf58   | 18     | 8  | 0.0016575058 | Chromosome 9 open reading frame 58                                                                 |           |
| 1345 | AK021606  |           | 15     | 7  | 0.0016609538 | CDNA FLJ11544 fis, clone HEMBA1002826                                                              |           |
| 1346 | AK026349  | TCEAL8    | 19     | 7  | 0.0016627656 | Transcription elongation factor A (SID)-like 8                                                     |           |
| 1347 | AK025434  | ZNF616    | 18     | 8  | 0.0016628434 | Zinc finger protein 616                                                                            |           |
| 1348 | AF207831  | ARHGEF6   | 14     | 5  | 0.0016637778 | Rac/Cdc42 guanine nucleotide exchange factor (GEF) 6                                               |           |
| 1349 | AK024562  | ECHDC3    | 16     | 7  | 0.0016710879 | Enoyl Coenzyme A hydratase domain containing 3                                                     |           |
| 1350 | NM_017977 | AIM1L     | 19     | 8  | 0.0016725147 | Absent in melanoma 1-like                                                                          |           |
| 1351 | D49387    | LTB4DH    | 17     | 8  | 0.0016833389 | Leukotriene B4 12-hydroxydehydrogenase                                                             |           |

|      |           |          |    |   |              |                                                                                                   |
|------|-----------|----------|----|---|--------------|---------------------------------------------------------------------------------------------------|
| 1352 | NM_003779 | B4GALT3  | 19 | 6 | 0.0016870597 | UDP-Gal:betaGlcNAc beta 1,4- galactosyltransferase, polypeptide 3                                 |
| 1353 | NM_004951 | EBI2     | 17 | 7 | 0.0016881105 | Epstein-Barr virus induced gene 2 (lymphocyte-specific G protein-coupled receptor)                |
| 1354 | AB037738  | KCTD16   | 14 | 7 | 0.0016905887 | Potassium channel tetramerisation domain containing 16                                            |
| 1355 | NM_002802 | PSMC1    | 19 | 7 | 0.0017039205 | Proteasome (prosome, macropain) 26S subunit, ATPase, 1                                            |
| 1356 | NM_015885 | PCF11    | 19 | 8 | 0.0017099381 | Pre-mRNA cleavage complex II protein Pcf11                                                        |
| 1357 | U65473    | ADCY5    | 19 | 8 | 0.0017128225 | Adenylate cyclase 5                                                                               |
| 1358 | AL049437  | FLJ36166 | 14 | 5 | 0.0017137073 | Hypothetical protein FLJ36166                                                                     |
| 1359 | NM_000313 | PROS1    | 14 | 8 | 0.0017202924 | Protein S (alpha)                                                                                 |
| 1360 | NM_002133 | HMOX1    | 18 | 8 | 0.0017203889 | Heme oxygenase (decycling) 1                                                                      |
| 1361 | AK026561  |          | 15 | 7 | 0.0017214115 | Data not found                                                                                    |
| 1362 | NM_002602 | PDE6G    | 18 | 7 | 0.0017255195 | Phosphodiesterase 6G, cGMP-specific, rod, gamma                                                   |
| 1363 | NM_005723 | TM4SF9   | 17 | 8 | 0.0017256636 | Tetraspanin 5                                                                                     |
| 1364 | AF229179  | TMEM27   | 19 | 8 | 0.0017283855 | Transmembrane protein 27                                                                          |
| 1365 | NM_000018 | ACADVL   | 19 | 8 | 0.0017294664 | Acyl-Coenzyme A dehydrogenase, very long chain                                                    |
| 1366 | AF073328  |          | 12 | 7 | 0.0017303141 | Tetracycline transporter-like gene, 3'UTR                                                         |
| 1367 | U12129    | PTPN13   | 13 | 5 | 0.0017328533 | Protein tyrosine phosphatase, non-receptor type 13 (APO-1/CD95 (Fas)-associated phosphatase)      |
| 1368 | AK000677  | ETNK1    | 15 | 7 | 0.0017348346 | Ethanolamine kinase 1                                                                             |
| 1369 | AB040927  | SH3MD2   | 18 | 8 | 0.0017394363 | SH3 multiple domains 2                                                                            |
| 1370 | NM_003070 | SMARCA2  | 19 | 8 | 0.0017470596 | SWI/SNF related, matrix associated, actin dependent regulator of chromatin, subfamily a, member 2 |
| 1371 | AK025118  | RUFY1    | 18 | 8 | 0.0017480081 | RUN and FYVE domain containing 1                                                                  |
| 1372 | AB037845  | ARHGAP21 | 19 | 8 | 0.0017482960 | Rho GTPase activating protein 21                                                                  |
| 1373 | NM_002855 | PVRL1    | 18 | 7 | 0.0017516349 | Hypothetical protein MGC16207                                                                     |
| 1374 | NM_013410 | AK3      | 18 | 7 | 0.0017518860 | Adenylate kinase 3-like 1                                                                         |
| 1375 | NM_018328 | MBD5     | 18 | 8 | 0.0017537058 | Methyl-CpG binding domain protein 5                                                               |
| 1376 | AK001295  | TUBB6    | 19 | 8 | 0.0017550652 | Tubulin, beta 6                                                                                   |
| 1377 | NM_016425 |          | 19 | 8 | 0.0017665305 | Data not found                                                                                    |
| 1378 | AK023891  | BTBD14B  | 13 | 8 | 0.0017674281 | BTB (POZ) domain containing 14B                                                                   |
| 1379 | K00627    |          | 13 | 6 | 0.0017704526 | Kpni repeat mrna (cdna clone pcd-kpni-8), 3' end                                                  |
| 1380 | NM_016009 | SH3GLB1  | 19 | 8 | 0.0017759097 | SH3-domain GRB2-like endophilin B1                                                                |
| 1381 | U79256    | ARHGAP19 | 17 | 8 | 0.0017771235 | Rho GTPase activating protein 19                                                                  |
| 1382 | AK021512  | C14orf43 | 15 | 6 | 0.0017773696 | Chromosome 14 open reading frame 43                                                               |
| 1383 | AL122118  | PABPC5   | 19 | 8 | 0.0017788785 | Poly(A) binding protein, cytoplasmic 5                                                            |
| 1384 | NM_014879 | P2RY14   | 17 | 7 | 0.0017790158 | Purinergic receptor P2Y, G-protein coupled, 14                                                    |
