# Supplementary material
Source: PubMed Central journal article supplement (PMC1860543)
Supplement: jclinpath_jcp.2005.035451_3.pdf [file jclinpath_jcp.2005.035451_3.pdf]

## Complimentary information 3: Downregulated in metastasized HNSCC vs non-metastasized

| Ranknumber | GEN_ID    | Symbol  | Non-meta (N) | Meta (N) | P-Student | Description                                                            |
|------------|-----------|---------|--------------|----------|-----------|------------------------------------------------------------------------|
| 1          | AF085861  | PCDH9   | 6            | 7        | 0.000087  | Protocadherin 9                                                        |
| 2          | NM_001480 | GALR1   | 8            | 9        | 0.000141  | Galanin receptor 1                                                     |
| 3          | NM_000092 | COL4A4  | 8            | 10       | 0.000191  | Collagen, type IV, alpha 4                                             |
| 4          | U18909    |         | 8            | 10       | 0.000473  | Data not found                                                         |
| 5          | NM_018207 | TRIM62  | 8            | 9        | 0.000484  | Tripartite motif-containing 62                                         |
| 6          | AK024214  | RERE    | 6            | 8        | 0.000494  | Arginine-glutamic acid dipeptide (RE) repeats                          |
| 7          | AF090927  |         | 8            | 9        | 0.000506  | Data not found                                                         |
| 8          | NM_001055 | SULT1A1 | 8            | 11       | 0.000670  | Sulfotransferase family, cytosolic, 1A, phenol-preferring              |
| 9          | NM_015239 | AGTPBP1 | 6            | 11       | 0.000672  | ATP/GTP binding protein 1                                              |
| 10         | NM_012126 | CHST5   | 8            | 10       | 0.000810  | Carbohydrate (N-acetylglucosamine 6-O) sulfotransferase 5              |
| 11         | NM_002613 | PDPK1   | 6            | 8        | 0.000912  | 3-phosphoinositide dependent protein kinase-1                          |
| 12         | AL137637  |         | 5            | 8        | 0.000926  | MRNA; cDNA DKFZp434J035 (from clone DKFZp434J035)                      |
| 13         | AB000509  | TRAF5   | 8            | 10       | 0.000940  | TNF receptor-associated factor 5                                       |
| 14         | NM_014097 |         | 8            | 11       | 0.000981  | Data not found                                                         |
| 15         | AK025573  |         | 5            | 6        | 0.001038  | Data not found                                                         |
| 16         | NM_000203 | IDUA    | 8            | 10       | 0.001074  | Iduronidase, alpha-L-                                                  |
| 17         | NM_003266 | TLR4    | 8            | 11       | 0.001270  | Toll-like receptor 4                                                   |
| 18         | M55406    | MUC3A   | 5            | 11       | 0.001417  | Mucin 3A, intestinal                                                   |
| 19         | U48728    |         | 6            | 11       | 0.001424  | Data not found                                                         |
| 20         | NM_014684 |         | 8            | 11       | 0.001446  | Data not found                                                         |
| 21         | NM_005618 | DLL1    | 6            | 11       | 0.001483  | Delta-like 1 (Drosophila)                                              |
| 22         | NM_006641 | CCR9    | 7            | 10       | 0.001559  | Chemokine (C-C motif) receptor 9                                       |
| 23         | NM_016341 | PLCE1   | 8            | 10       | 0.001560  | Phospholipase C, epsilon 1                                             |
| 24         | AK023270  | SEC22L1 | 7            | 8        | 0.001672  | SEC22 vesicle trafficking protein-like 1 (S. cerevisiae)               |
| 25         | AF136408  |         | 7            | 8        | 0.001689  | Data not found                                                         |
| 26         | NM_013334 | GMPPB   | 8            | 11       | 0.001763  | GDP-mannose pyrophosphorylase B                                        |
| 27         | NM_006646 | WASF3   | 8            | 10       | 0.001860  | WAS protein family, member 3                                           |
| 28         | AF086091  | ALCAM   | 5            | 10       | 0.001996  | Activated leukocyte cell adhesion molecule                             |
| 29         | AF056425  | DAP     | 6            | 10       | 0.002056  | Death-associated protein                                               |
| 30         | U82313    | ATP8A2  | 7            | 5        | 0.002086  | ATPase, aminophospholipid transporter-like, Class I, type 8A, member 2 |
| 31         | AF086473  | ECHDC1  | 5            | 10       | 0.002110  | Enoyl Coenzyme A hydratase domain containing 1                         |

|    |           |          |   |    |          |                                                                                                     |
|----|-----------|----------|---|----|----------|-----------------------------------------------------------------------------------------------------|
| 32 | NM_004702 | CCNE2    | 7 | 9  | 0.002200 | Cyclin E2                                                                                           |
| 33 | NM_017694 | FLJ20160 | 7 | 8  | 0.002380 | FLJ20160 protein                                                                                    |
| 34 | AL050182  | GABARAP  | 7 | 10 | 0.002505 | GABA(A) receptor-associated protein                                                                 |
| 35 | NM_016601 | KCNK9    | 7 | 10 | 0.002526 | Potassium channel, subfamily K, member 9                                                            |
| 36 | Y10506    | SLC17A4  | 5 | 7  | 0.002700 | Solute carrier family 17 (sodium phosphate), member 4                                               |
| 37 | M17733    | TMSB4X   | 8 | 11 | 0.002737 | Thymosin, beta 4, X-linked                                                                          |
| 38 | AF086204  |          | 7 | 6  | 0.002827 | Hypothetical gene supported by AF086204                                                             |
| 39 | NM_000864 | HTR1D    | 7 | 9  | 0.002840 | 5-hydroxytryptamine (serotonin) receptor 1D                                                         |
| 40 | U52839    | DAP      | 8 | 8  | 0.002874 | Death-associated protein                                                                            |
| 41 | AK002107  | RAB3B    | 5 | 9  | 0.003113 | RAB3B, member RAS oncogene family                                                                   |
| 42 | NM_015185 | ARHGEF9  | 5 | 9  | 0.003399 | Cdc42 guanine nucleotide exchange factor (GEF) 9                                                    |
| 43 | AL110176  |          | 6 | 6  | 0.003522 | MRNA; cDNA DKFZp564I0816 (from clone DKFZp564I0816)                                                 |
| 44 | NM_003662 | PIR      | 8 | 11 | 0.003539 | Pirin (iron-binding nuclear protein)                                                                |
| 45 | NM_001107 | ACYP1    | 8 | 11 | 0.003555 | Acylphosphatase 1, erythrocyte (common) type                                                        |
| 46 | AK027107  | PPARG    | 7 | 9  | 0.003657 | Peroxisome proliferative activated receptor, gamma                                                  |
| 47 | AF038185  |          | 7 | 9  | 0.003676 | Clone 23700 mRNA sequence                                                                           |
| 48 | AL359607  | FAM19A1  | 7 | 5  | 0.003730 | Family with sequence similarity 19 (chemokine (C-C motif)-like), member A1                          |
| 49 | AK026198  | TncRNA   | 8 | 11 | 0.003762 | Trophoblast-derived noncoding RNA                                                                   |
| 50 | X52402    |          | 8 | 11 | 0.003784 | Data not found                                                                                      |
| 51 | NM_005166 | APLP1    | 7 | 11 | 0.003790 | Amyloid beta (A4) precursor-like protein 1                                                          |
| 52 | NM_014312 | VSIG2    | 5 | 8  | 0.003801 | V-set and immunoglobulin domain containing 2                                                        |
| 53 | X02067    |          | 8 | 11 | 0.003818 | Data not found                                                                                      |
| 54 | AF222927  | SAMSN1   | 8 | 10 | 0.003876 | SAM domain, SH3 domain and nuclear localisation signals, 1                                          |
| 55 | X51526    | CNTN2    | 7 | 9  | 0.003896 | Contactin 2 (axonal)                                                                                |
| 56 | NM_016474 | C3orf19  | 8 | 11 | 0.003897 | Chromosome 3 open reading frame 19                                                                  |
| 57 | NM_004059 | CCBL1    | 8 | 11 | 0.003908 | Cysteine conjugate-beta lyase; cytoplasmic (glutamine transaminase K, kyneurenine aminotransferase) |
| 58 | AB023139  | KIAA0922 | 8 | 11 | 0.003963 | KIAA0922 protein                                                                                    |
| 59 | NM_005036 | PPARA    | 8 | 11 | 0.004134 | Peroxisome proliferative activated receptor, alpha                                                  |
| 60 | AK026744  | FLJ23091 | 7 | 8  | 0.004157 | Chromosome 1 open reading frame 139                                                                 |
| 61 | AL049351  | SEC8L1   | 7 | 8  | 0.004176 | SEC8-like 1 (S. cerevisiae)                                                                         |
| 62 | NM_017994 | FLJ10099 | 8 | 8  | 0.004305 | Hypothetical protein FLJ10099                                                                       |
| 63 | M21897    | KLK3     | 8 | 11 | 0.004413 | Kallikrein 3, (prostate specific antigen)                                                           |
| 64 | AK026869  | MGC3222  | 6 | 8  | 0.004532 | Transmembrane protein 43                                                                            |

|    |           |           |   |    |          |                                                                           |
|----|-----------|-----------|---|----|----------|---------------------------------------------------------------------------|
| 65 | AL359211  | DREV1     | 7 | 7  | 0.004577 | DORA reverse strand protein 1                                             |
| 66 | NM_002677 | PMP2      | 6 | 6  | 0.004684 | Peripheral myelin protein 2                                               |
| 67 | NM_005426 | TP53BP2   | 8 | 9  | 0.004692 | Tumor protein p53 binding protein, 2                                      |
| 68 | NM_000479 | AMH       | 6 | 10 | 0.004796 | Anti-Mullerian hormone                                                    |
| 69 | NM_001176 | ARHGDI3   | 5 | 11 | 0.005033 | Rho GDP dissociation inhibitor (GDI) gamma                                |
| 70 | NM_001060 | TBXA2R    | 6 | 9  | 0.005107 | Thromboxane A2 receptor                                                   |
| 71 | AK022766  | MGC29875  | 5 | 9  | 0.005166 | Chromosome 1 open reading frame 107                                       |
| 72 | AK022292  | ZNF346    | 7 | 9  | 0.005170 | Zinc finger protein 346                                                   |
| 73 | AK021789  | LOC146174 | 7 | 10 | 0.005196 | Chromosome 16 open reading frame 52                                       |
| 74 | NM_004802 | OTOF      | 7 | 11 | 0.005205 | Otoferlin                                                                 |
| 75 | AF143882  |           | 7 | 6  | 0.005210 | Clone IMAGE:121214 mRNA sequence                                          |
| 76 | AF248646  | MMP26     | 5 | 8  | 0.005291 | Matrix metalloproteinase 26                                               |
| 77 | NM_018629 |           | 6 | 8  | 0.005363 | Data not found                                                            |
| 78 | NM_004874 | BAG4      | 8 | 11 | 0.005379 | BCL2-associated athanogene 4                                              |
| 79 | AL050065  | HRMT1L1   | 7 | 9  | 0.005505 | HMT1 hnRNP methyltransferase-like 1 (S. cerevisiae)                       |
| 80 | AF320070  |           | 8 | 9  | 0.005572 | Data not found                                                            |
| 81 | NM_003110 | SP2       | 8 | 11 | 0.005679 | Sp2 transcription factor                                                  |
| 82 | AF131834  |           | 7 | 9  | 0.005697 | Clone 24841 mRNA sequence                                                 |
| 83 | NM_012148 |           | 8 | 10 | 0.005797 | Data not found                                                            |
| 84 | NM_004134 | HSPA9B    | 7 | 11 | 0.005799 | Heat shock 70kDa protein 9B (mortalin-2)                                  |
| 85 | AK027193  | BACH2     | 5 | 11 | 0.005829 | BTB and CNC homology 1, basic leucine zipper transcription factor 2       |
| 86 | NM_017806 | FLJ20406  | 6 | 10 | 0.005850 | Lck interacting transmembrane adaptor 1                                   |
| 87 | X85106    | RPS6KA2   | 8 | 9  | 0.005930 | Ribosomal protein S6 kinase, 90kDa, polypeptide 2                         |
| 88 | NM_018046 | AGGF1     | 7 | 11 | 0.005989 | Angiogenic factor with G patch and FHA domains 1                          |
| 89 | S49432    | COL6A3    | 5 | 8  | 0.006116 | Collagen, type VI, alpha 3                                                |
| 90 | AF086488  | SCMH1     | 6 | 8  | 0.006187 | Sex comb on midleg homolog 1 (Drosophila)                                 |
| 91 | NM_016529 | ATP8A2    | 7 | 9  | 0.006307 | ATPase, aminophospholipid transporter-like, Class I, type 8A, member 2    |
| 92 | NM_018674 | ACCN4     | 7 | 11 | 0.006430 | Amiloride-sensitive cation channel 4, pituitary                           |
| 93 | NM_000703 |           | 7 | 9  | 0.006512 | Data not found                                                            |
| 94 | AK025082  | SND1      | 7 | 11 | 0.006585 | Staphylococcal nuclease domain containing 1                               |
| 95 | NM_003684 | MKNK1     | 7 | 9  | 0.006613 | MAP kinase interacting serine/threonine kinase 1                          |
| 96 | AB040879  | KIAA1446  | 8 | 11 | 0.006617 | Likely ortholog of rat brain-enriched guanylate kinase-associated protein |
| 97 | AK026132  | PHF17     | 7 | 11 | 0.006628 | PHD finger protein 17                                                     |

|     |           |          |   |    |          |                                                                       |
|-----|-----------|----------|---|----|----------|-----------------------------------------------------------------------|
| 98  | AL050067  |          | 5 | 9  | 0.006638 | Data not found                                                        |
| 99  | NM_015644 | TTL3     | 8 | 9  | 0.006639 | Tubulin tyrosine ligase-like family, member 3                         |
| 100 | NM_001965 | EGR4     | 7 | 10 | 0.006643 | Early growth response 4                                               |
| 101 | NM_004396 | DDX5     | 6 | 9  | 0.006706 | RNA-binding protein 45 (RBP45), putative                              |
| 102 | NM_014174 | THY28    | 6 | 5  | 0.006754 | Thymocyte protein thy28                                               |
| 103 | AK022417  | FLJ12355 | 8 | 10 | 0.006963 | Hypothetical protein FLJ12355                                         |
| 104 | NM_002060 | GJA4     | 7 | 9  | 0.006978 | Gap junction protein, alpha 4, 37kDa (connexin 37)                    |
| 105 | NM_004694 | SLC16A6  | 8 | 11 | 0.007014 | Solute carrier family 16 (monocarboxylic acid transporters), member 6 |
| 106 | NM_004845 | PCYT1B   | 7 | 11 | 0.007169 | Phosphate cytidyltransferase 1, choline, beta isoform                 |
| 107 | NM_017604 |          | 8 | 11 | 0.007262 | Data not found                                                        |
| 108 | AF007131  |          | 5 | 8  | 0.007378 | Clone 23963 mRNA sequence                                             |
| 109 | NM_017927 | MFN1     | 8 | 11 | 0.007466 | Mitofusin 1                                                           |
| 110 | AF087983  |          | 6 | 9  | 0.007497 | Full length insert cDNA clone YW28G08                                 |
| 111 | NM_003569 | STX7     | 7 | 11 | 0.007863 | Syntaxin 7                                                            |
| 112 | AK001143  |          | 8 | 11 | 0.007908 | Data not found                                                        |
| 113 | NM_020200 | PRTFDC1  | 8 | 10 | 0.008081 | Phosphoribosyl transferase domain containing 1                        |
| 114 | NM_005567 | LGALS3BP | 6 | 9  | 0.008100 | Lectin, galactoside-binding, soluble, 3 binding protein               |
| 115 | AB044137  | PPP1R2P9 | 8 | 10 | 0.008101 | Protein phosphatase 1, regulatory (inhibitor) subunit 2 pseudogene 9  |
| 116 | NM_013308 | GPR171   | 6 | 9  | 0.008131 | G protein-coupled receptor 171                                        |
| 117 | NM_016824 | ADD3     | 7 | 11 | 0.008166 | Adducin 3 (gamma)                                                     |
| 118 | AK023108  | XPO4     | 8 | 9  | 0.008178 | Exportin 4                                                            |
| 119 | NM_014073 |          | 7 | 11 | 0.008181 | Data not found                                                        |
| 120 | NM_006584 | CCT6B    | 8 | 10 | 0.008227 | Chaperonin containing TCP1, subunit 6B (zeta 2)                       |
| 121 | AL117508  |          | 8 | 11 | 0.008259 | Similar to Epidermal Langerhans cell protein LCP1                     |
| 122 | Z83948    | TRIM38   | 6 | 8  | 0.008367 | Tripartite motif-containing 38                                        |
| 123 | NM_001242 | TNFRSF7  | 6 | 7  | 0.008391 | Tumor necrosis factor receptor superfamily, member 7                  |
| 124 | NM_007265 | HSGT1    | 7 | 10 | 0.008396 | Suppressor of <i>S. cerevisiae</i> gcr2                               |
| 125 | AK026600  | ORAOV1   | 7 | 11 | 0.008410 | Oral cancer overexpressed 1                                           |
| 126 | AF161411  | C9orf80  | 8 | 8  | 0.008419 | Chromosome 9 open reading frame 80                                    |
| 127 | AF129928  | HERC2    | 5 | 10 | 0.008426 | Hect domain and RLD 2                                                 |
| 128 | NM_015871 | ZNF593   | 8 | 11 | 0.008452 | Zinc finger protein 593                                               |
| 129 | NM_012326 | MAPRE3   | 8 | 11 | 0.008552 | Microtubule-associated protein, RP/EB family, member 3                |
| 130 | NM_014251 | SLC25A13 | 8 | 11 | 0.008748 | Solute carrier family 25, member 13 (citrin)                          |

|     |           |          |   |    |          |                                                                                                                                                      |
|-----|-----------|----------|---|----|----------|------------------------------------------------------------------------------------------------------------------------------------------------------|
| 131 | AL359567  | IGSF4    | 5 | 8  | 0.008808 | Immunoglobulin superfamily, member 4                                                                                                                 |
| 132 | NM_004569 | PIGH     | 8 | 10 | 0.008815 | Phosphatidylinositol glycan, class H                                                                                                                 |
| 133 | M11948    | TMSB4X   | 8 | 11 | 0.008833 | Thymosin, beta 4, X-linked                                                                                                                           |
| 134 | AK026593  | C16orf33 | 8 | 11 | 0.008894 | Chromosome 16 open reading frame 33                                                                                                                  |
| 135 | NM_002971 | SATB1    | 8 | 11 | 0.008972 | Special AT-rich sequence binding protein 1 (binds to nuclear matrix/scaffold-associating DNA's)                                                      |
| 136 | AJ293009  | DECR2    | 8 | 10 | 0.009002 | 2,4-dienoyl CoA reductase 2, peroxisomal                                                                                                             |
| 137 | NM_014342 | MTCH2    | 8 | 10 | 0.009007 | Mitochondrial carrier homolog 2 ( <i>C. elegans</i> )                                                                                                |
| 138 | AF052119  |          | 6 | 9  | 0.009018 | Clone 23622 mRNA sequence                                                                                                                            |
| 139 | AJ243672  | S100A7L1 | 6 | 8  | 0.009026 | S100 calcium binding protein A7-like 1                                                                                                               |
| 140 | NM_020141 | AD-020   | 7 | 10 | 0.009044 | Chromosome 1 open reading frame 119                                                                                                                  |
| 141 | AK002123  | KIAA0143 | 5 | 8  | 0.009061 | KIAA0143 protein                                                                                                                                     |
| 142 | NM_016138 | COQ7     | 8 | 11 | 0.009073 | Coenzyme Q7 homolog, ubiquinone (yeast)                                                                                                              |
| 143 | AK023422  | TANC     | 5 | 9  | 0.009162 | TPR domain, ankyrin-repeat and coiled-coil-containing<br>UDP-N-acetyl-alpha-D-galactosamine:polypeptide N-acetylgalactosaminyltransferase 6 (GalNAc- |
| 144 | NM_007210 | GALNT6   | 8 | 11 | 0.009173 | T6)                                                                                                                                                  |
| 145 | NM_001917 | DAO      | 7 | 10 | 0.009267 | D-amino-acid oxidase                                                                                                                                 |
| 146 | NM_006346 | C13orf24 | 8 | 11 | 0.009304 | Chromosome 13 open reading frame 24                                                                                                                  |
| 147 | NM_001185 | AZGP1    | 6 | 8  | 0.009373 | Alpha-2-glycoprotein 1, zinc                                                                                                                         |
| 148 | NM_005623 | CCL8     | 5 | 8  | 0.009443 | Chemokine (C-C motif) ligand 8                                                                                                                       |
| 149 | AB035130  | CYP4F12  | 8 | 10 | 0.009456 | Cytochrome P450, family 4, subfamily F, polypeptide 12                                                                                               |
| 150 | D17234    | FLJ10504 | 5 | 10 | 0.009539 | Misato homolog 1 ( <i>Drosophila</i> )                                                                                                               |
| 151 | U17621    |          | 7 | 8  | 0.009604 | Data not found                                                                                                                                       |
| 152 | NM_003944 | SELENBP1 | 7 | 11 | 0.009619 | Selenium binding protein 1                                                                                                                           |
| 153 | NM_020421 | ADCK1    | 8 | 10 | 0.009629 | AarF domain containing kinase 1                                                                                                                      |
| 154 | NM_000780 | CYP7A1   | 7 | 8  | 0.009633 | Cytochrome P450, family 7, subfamily A, polypeptide 1                                                                                                |
| 155 | AF052149  | BSCL2    | 7 | 11 | 0.009725 | Bernardinelli-Seip congenital lipodystrophy 2 (seipin)                                                                                               |
| 156 | AF217227  | ZNF287   | 8 | 10 | 0.009729 | Zinc finger protein 287                                                                                                                              |
| 157 | AK022121  | MAML2    | 6 | 9  | 0.009750 | Mastermind-like 2 ( <i>Drosophila</i> )                                                                                                              |
| 158 | AK026706  | TRIM52   | 5 | 9  | 0.009790 | Tripartite motif-containing 52                                                                                                                       |
| 159 | L48516    | PON3     | 8 | 11 | 0.009900 | Paraoxonase 3                                                                                                                                        |
| 160 | AK000995  |          | 5 | 8  | 0.009901 | CDNA FLJ10133 fis, clone HEMBA1003067                                                                                                                |
| 161 | NM_018532 |          | 6 | 10 | 0.010054 | Data not found                                                                                                                                       |
| 162 | AK024205  |          | 6 | 10 | 0.010074 | CDNA FLJ14143 fis, clone MAMMA1002892                                                                                                                |
| 163 | NM_004828 | NCR2     | 6 | 8  | 0.010221 | Natural cytotoxicity triggering receptor 2                                                                                                           |

|     |           |          |       |   |    |          |                                                                         |
|-----|-----------|----------|-------|---|----|----------|-------------------------------------------------------------------------|
| 164 | NM_006393 | NEBL     |       | 7 | 11 | 0.010244 | Nebulette                                                               |
| 165 | AF086287  | PRKCA    |       | 6 | 7  | 0.010247 | Protein kinase C, alpha                                                 |
| 166 | AK024341  | AHSA2    |       | 6 | 9  | 0.010286 | AHA1, activator of heat shock 90kDa protein ATPase homolog 2 (yeast)    |
| 167 | NM_017929 | PEX26    |       | 6 | 8  | 0.010292 | Peroxisome biogenesis factor 26                                         |
| 168 | NM_002386 | MC1R     |       | 7 | 9  | 0.010348 | Melanocortin 1 receptor (alpha melanocyte stimulating hormone receptor) |
| 169 | NM_001181 | ASGR2    |       | 7 | 9  | 0.010354 | Asialoglycoprotein receptor 2                                           |
| 170 | NM_005667 | RNF103   |       | 6 | 10 | 0.010354 | Ring finger protein 103                                                 |
| 171 | NM_002319 | LRCH4    |       | 7 | 10 | 0.010416 | Leucine-rich repeats and calponin homology (CH) domain containing 4     |
| 172 | NM_001803 | CDW52    |       | 6 | 9  | 0.010434 | CD52 antigen (CAMPATH-1 antigen)                                        |
| 173 | NM_004877 | GMFG     |       | 8 | 11 | 0.010440 | Glia maturation factor, gamma                                           |
| 174 | NM_019106 |          | 38598 | 7 | 8  | 0.010561 | Septin 3                                                                |
| 175 | NM_000160 | GCGR     |       | 8 | 10 | 0.010573 | Glucagon receptor                                                       |
| 176 | NM_004797 | ACDC     |       | 6 | 7  | 0.010623 | Adiponectin, C1Q and collagen domain containing                         |
| 177 | NM_004037 | AMPD2    |       | 8 | 11 | 0.010651 | Adenosine monophosphate deaminase 2 (isoform L)                         |
| 178 | AF132362  | HNRPH3   |       | 8 | 10 | 0.010658 | Heterogeneous nuclear ribonucleoprotein H3 (2H9)                        |
| 179 | NM_001000 | RPL39    |       | 8 | 10 | 0.010746 | RNA, U69 small nucleolar                                                |
| 180 | AL137763  | TFCP2L4  |       | 8 | 9  | 0.010758 | Grainyhead-like 3 (Drosophila)                                          |
| 181 | X65463    | RXRβ     |       | 7 | 9  | 0.010892 | Retinoid X receptor, beta                                               |
| 182 | NM_002866 | RAB3A    |       | 8 | 10 | 0.011157 | RAB3A, member RAS oncogene family                                       |
| 183 | NM_001023 | RPS20    |       | 8 | 11 | 0.011202 | Ribosomal protein S20                                                   |
| 184 | NM_002149 | HPCAL1   |       | 8 | 11 | 0.011215 | Hippocalcin-like 1                                                      |
| 185 | AB002361  | KIAA0363 |       | 8 | 8  | 0.011290 | KIAA0363 protein                                                        |
| 186 | AF131781  | FLJ12442 |       | 8 | 11 | 0.011777 | Hypothetical protein FLJ12442                                           |
| 187 | NM_004808 | NMT2     |       | 7 | 10 | 0.011848 | N-myristoyltransferase 2                                                |
| 188 | NM_007193 | ANXA10   |       | 7 | 10 | 0.011913 | Annexin A10                                                             |
| 189 | AK022210  |          |       | 6 | 9  | 0.012013 | CDNA FLJ12148 fis, clone MAMMA1000414                                   |
| 190 | NM_005307 | GRK4     |       | 8 | 8  | 0.012285 | G protein-coupled receptor kinase 4                                     |
| 191 | AF293335  | KIAA1967 |       | 8 | 10 | 0.012351 | KIAA1967                                                                |
| 192 | NM_006661 | PDE10A   |       | 8 | 10 | 0.012406 | Phosphodiesterase 10A                                                   |
| 193 | AL050151  | EIF2C2   |       | 7 | 10 | 0.012411 | Eukaryotic translation initiation factor 2C, 2                          |
| 194 | NM_003579 | RAD54L   |       | 7 | 11 | 0.012512 | RAD54-like (S. cerevisiae)                                              |
| 195 | NM_014285 | EXOSC2   |       | 8 | 11 | 0.012608 | Exosome component 2                                                     |
| 196 | NM_012115 | CASP8AP2 |       | 7 | 10 | 0.012626 | CASP8 associated protein 2                                              |

|     |           |           |   |    |          |                                                                                                |
|-----|-----------|-----------|---|----|----------|------------------------------------------------------------------------------------------------|
| 197 | NM_004264 | SURB7     | 8 | 11 | 0.012653 | SRB7 suppressor of RNA polymerase B homolog (yeast)                                            |
| 198 | NM_014522 | PCDH11X   | 7 | 11 | 0.012695 | Protocadherin 11 X-linked                                                                      |
| 199 | AK024430  | ARMC5     | 6 | 10 | 0.012709 | Armadillo repeat containing 5                                                                  |
| 200 | AB037778  | NHSL1     | 7 | 11 | 0.012788 | NHS-like 1                                                                                     |
| 201 | NM_002870 | RAB13     | 8 | 9  | 0.012890 | RAB13, member RAS oncogene family                                                              |
| 202 | AK025863  | MGC4707   | 8 | 9  | 0.012897 | MGC4707 protein                                                                                |
| 203 | AL122070  | LOC285429 | 5 | 8  | 0.012905 | Hypothetical protein LOC285429                                                                 |
| 204 | NM_000583 | GC        | 6 | 11 | 0.012907 | Group-specific component (vitamin D binding protein)                                           |
| 205 | D16815    | NR1D2     | 8 | 10 | 0.012909 | Nuclear receptor subfamily 1, group D, member 2                                                |
| 206 | NM_003923 | FOXH1     | 8 | 9  | 0.012994 | Forkhead box H1                                                                                |
| 207 | AK025110  | ZNF529    | 6 | 9  | 0.012998 | Zinc finger protein 529                                                                        |
| 208 | NM_001716 | BLR1      | 7 | 9  | 0.013070 | Burkitt lymphoma receptor 1, GTP binding protein (chemokine (C-X-C motif) receptor 5)          |
| 209 | AK022095  | NFIB      | 6 | 6  | 0.013119 | Nuclear factor I/B                                                                             |
| 210 | NM_003620 | PPM1D     | 7 | 10 | 0.013131 | Protein phosphatase 1D magnesium-dependent, delta isoform                                      |
| 211 | AF075105  |           | 5 | 7  | 0.013285 | Full length insert cDNA YT92C06                                                                |
| 212 | NM_007116 |           | 8 | 10 | 0.013295 | Data not found                                                                                 |
| 213 | D16914    |           | 8 | 11 | 0.013394 | Data not found                                                                                 |
| 214 | AK024408  |           | 7 | 10 | 0.013441 | Data not found                                                                                 |
| 215 | AF130053  | G22P1     | 6 | 5  | 0.013467 | X-ray repair complementing defective repair in Chinese hamster cells 6 (Ku autoantigen, 70kDa) |
| 216 | NM_005311 | GRB10     | 8 | 11 | 0.013533 | Growth factor receptor-bound protein 10                                                        |
| 217 | AF060169  |           | 8 | 10 | 0.013574 | Data not found                                                                                 |
| 218 | AF088058  |           | 7 | 7  | 0.013590 | LOC440441                                                                                      |
| 219 | D55638    |           | 5 | 5  | 0.013731 | B-cell PABL (pseudautosomal boundary-like sequence) mRNA, clone Bc4                            |
| 220 | NM_014258 | SYCP2     | 8 | 11 | 0.013774 | Synaptonemal complex protein 2                                                                 |
| 221 | AK026394  | T1        | 7 | 9  | 0.013927 | IKK2 binding protein                                                                           |
| 222 | AK025769  | SMC6L1    | 7 | 11 | 0.014066 | SMC6 structural maintenance of chromosomes 6-like 1 (yeast)                                    |
| 223 | NM_004418 | DUSP2     | 8 | 9  | 0.014073 | Dual specificity phosphatase 2                                                                 |
| 224 | NM_000136 | FANCC     | 7 | 9  | 0.014073 | Fanconi anemia, complementation group C                                                        |
| 225 | M12807    | CD4       | 8 | 9  | 0.014104 | CD4 antigen (p55)                                                                              |
| 226 | AF079529  | PDE8B     | 5 | 7  | 0.014138 | Phosphodiesterase 8B                                                                           |
| 227 | AF086461  | FLJ45744  | 6 | 8  | 0.014145 | RGS9 anchor protein                                                                            |
| 228 | NM_015997 | CGI-41    | 8 | 10 | 0.014159 | Chromosome 1 open reading frame 66                                                             |
| 229 | AF130111  | HDAC3     | 8 | 11 | 0.014194 | Histone deacetylase 3                                                                          |

|     |           |           |   |    |          |                                                                                              |
|-----|-----------|-----------|---|----|----------|----------------------------------------------------------------------------------------------|
| 230 | NM_002788 | PSMA3     | 6 | 10 | 0.014315 | Proteasome (prosome, macropain) subunit, alpha type, 3                                       |
| 231 | NM_012238 | SIRT1     | 8 | 11 | 0.014348 | Sirtuin (silent mating type information regulation 2 homolog) 1 (S. cerevisiae)              |
| 232 | AF286160  | PLEKHA1   | 8 | 11 | 0.014360 | Pleckstrin homology domain containing, family A (phosphoinositide binding specific) member 1 |
| 233 | NM_018441 | PECR      | 8 | 11 | 0.014435 | Peroxisomal trans-2-enoyl-CoA reductase                                                      |
| 234 | AL133101  |           | 8 | 10 | 0.014547 | CDNA clone IMAGE:5270591                                                                     |
| 235 | AB018310  | KIAA0767  | 7 | 10 | 0.014623 | Death-inducing-protein                                                                       |
| 236 | NM_017877 | C2orf18   | 7 | 10 | 0.014703 | Chromosome 2 open reading frame 18                                                           |
| 237 | NM_006014 | DXS9879E  | 8 | 9  | 0.014709 | DNA segment on chromosome X (unique) 9879 expressed sequence                                 |
| 238 | NM_003180 | SYT5      | 7 | 8  | 0.014740 | Synaptotagmin V                                                                              |
| 239 | AK023792  | PKNOX2    | 7 | 9  | 0.014765 | PBX/knotted 1 homeobox 2                                                                     |
| 240 | AL117398  | TJP4      | 7 | 10 | 0.014796 | Tight junction associated protein 1 (peripheral)                                             |
| 241 | AL122088  | SB145     | 8 | 10 | 0.014838 | LysM, putative peptidoglycan-binding, domain containing 1                                    |
| 242 | AL137476  | LOC149837 | 7 | 6  | 0.014888 | Hypothetical protein LOC149837                                                               |
| 243 | NM_014959 | CARD8     | 6 | 11 | 0.014912 | Caspase recruitment domain family, member 8                                                  |
| 244 | AK001853  | LOC400657 | 8 | 11 | 0.014914 | Hypothetical gene supported by BC036588                                                      |
| 245 | AF070591  | FLJ46061  | 7 | 11 | 0.014940 | FLJ46061 protein                                                                             |
| 246 | AK022353  |           | 5 | 8  | 0.014952 | Data not found                                                                               |
| 247 | NM_012279 | ZNF346    | 8 | 11 | 0.014953 | Zinc finger protein 346                                                                      |
| 248 | AK025271  | EEF1G     | 8 | 11 | 0.014979 | Eukaryotic translation elongation factor 1 gamma                                             |
| 249 | D86979    | KIAA0226  | 8 | 9  | 0.015000 | KIAA0226                                                                                     |
| 250 | NM_018505 |           | 8 | 9  | 0.015013 | Data not found                                                                               |
| 251 | NM_018651 | ZNF167    | 6 | 8  | 0.015051 | Zinc finger protein 167                                                                      |
| 252 | NM_006890 | CEACAM7   | 8 | 8  | 0.015131 | Carcinoembryonic antigen-related cell adhesion molecule 7                                    |
| 253 | AB040937  |           | 8 | 11 | 0.015219 | Data not found                                                                               |
| 254 | NM_012415 | RAD54B    | 8 | 9  | 0.015237 | RAD54 homolog B (S. cerevisiae)                                                              |
| 255 | NM_014952 | BAHD1     | 6 | 11 | 0.015245 | Bromo adjacent homology domain containing 1                                                  |
| 256 | NM_015985 | ANGPT4    | 8 | 10 | 0.015259 | Angiopoietin 4                                                                               |
| 257 | M34423    | GLB1      | 8 | 11 | 0.015392 | Galactosidase, beta 1                                                                        |
| 258 | AK023857  | LOC149478 | 6 | 10 | 0.015408 | Hypothetical protein LOC149478                                                               |
| 259 | NM_014364 | GAPDS     | 8 | 10 | 0.015455 | Glyceraldehyde-3-phosphate dehydrogenase, spermatogenic                                      |
| 260 | NM_001877 | CR2       | 6 | 8  | 0.015473 | Complement component (3d/Epstein Barr virus) receptor 2                                      |
| 261 | AL137665  | TUBGCP6   | 7 | 10 | 0.015585 | Tubulin, gamma complex associated protein 6                                                  |
| 262 | AF086274  |           | 8 | 10 | 0.015591 | Full length insert cDNA clone ZD45B04                                                        |



|     |           |               |   |    |          |                                                                                |
|-----|-----------|---------------|---|----|----------|--------------------------------------------------------------------------------|
| 263 | NM_004716 | PCSK7         | 7 | 11 | 0.015676 | Proprotein convertase subtilisin/kexin type 7                                  |
| 264 | NM_000057 | BLM           | 8 | 11 | 0.015693 | Bloom syndrome                                                                 |
| 265 | NM_015929 | LIPT1         | 7 | 10 | 0.015828 | Lipoyltransferase 1                                                            |
| 266 | U17624    | ERG           | 8 | 8  | 0.015927 | V-ets erythroblastosis virus E26 oncogene like (avian)                         |
| 267 | AF124432  | HOM-TES-103   | 8 | 11 | 0.015937 | HOM-TES-103 tumor antigen-like                                                 |
| 268 | AK026304  | NGEF          | 5 | 8  | 0.016009 | Neuronal guanine nucleotide exchange factor                                    |
| 269 | Y11162    | RNU68         | 8 | 11 | 0.016017 | RNA, U68 small nucleolar                                                       |
| 270 | AL080060  |               | 6 | 8  | 0.016085 | MRNA; cDNA DKFZp564H172 (from clone DKFZp564H172)                              |
| 271 | AB018303  | ZNF423        | 8 | 11 | 0.016094 | Zinc finger protein 423                                                        |
| 272 | AF131760  | LRP10         | 8 | 10 | 0.016094 | Low density lipoprotein receptor-related protein 10                            |
| 273 | AK001558  |               | 5 | 9  | 0.016314 | CDNA FLJ10696 fis, clone NT2RP3000484                                          |
| 274 | NM_000250 | MPO           | 7 | 9  | 0.016362 | Myeloperoxidase                                                                |
| 275 | AL110111  | GPR126        | 5 | 8  | 0.016387 | G protein-coupled receptor 126                                                 |
| 276 | AK026760  | C20orf119     | 8 | 11 | 0.016586 | Similar to embryonic poly(A) binding protein                                   |
| 277 | AK023474  |               | 7 | 7  | 0.016701 | Data not found                                                                 |
| 278 | AB011090  | MGA           | 8 | 9  | 0.016819 | MAX gene associated                                                            |
| 279 | NM_016952 | CDON          | 8 | 11 | 0.016859 | Cell adhesion molecule-related/down-regulated by oncogenes                     |
| 280 | AL133658  | ODF3          | 6 | 9  | 0.016912 | Outer dense fiber of sperm tails 3                                             |
| 281 | NM_003046 | SLC7A2        | 7 | 11 | 0.016920 | Solute carrier family 7 (cationic amino acid transporter, y+ system), member 2 |
| 282 | NM_013230 | CD24          | 8 | 10 | 0.016990 | CD24 antigen (small cell lung carcinoma cluster 4 antigen)                     |
| 283 | AK025837  | FLJ22184      | 5 | 9  | 0.016994 | Hypothetical protein FLJ22184                                                  |
| 284 | AK023400  | AXOT          | 8 | 10 | 0.017013 | Membrane-associated ring finger (C3HC4) 7                                      |
| 285 | NM_016006 | ABHD5         | 8 | 7  | 0.017025 | Abhydrolase domain containing 5                                                |
| 286 | AK026436  | ARRDC4        | 8 | 6  | 0.017031 | Arrestin domain containing 4                                                   |
| 287 | AL109698  | DKFZp547K1113 | 6 | 10 | 0.017055 | Hypothetical protein DKFZp547K1113                                             |
| 288 | AF086157  | PERQ1         | 8 | 10 | 0.017378 | PERQ amino acid rich, with GYF domain 1                                        |
| 289 | AK022712  | FLJ12650      | 5 | 9  | 0.017442 | Hypothetical protein FLJ12650                                                  |
| 290 | AF085995  |               | 7 | 9  | 0.017584 | Full length insert cDNA clone YU26H08                                          |
| 291 | NM_017682 | VMD2L1        | 8 | 8  | 0.017598 | Vitelliform macular dystrophy 2-like 1                                         |
| 292 | NM_001041 | SI            | 8 | 11 | 0.017655 | Sucrase-isomaltase (alpha-glucosidase)                                         |
| 293 | AK023870  |               | 6 | 9  | 0.017789 | CDNA FLJ13808 fis, clone THYRO1000253                                          |
| 294 | NM_002751 | MAPK11        | 6 | 7  | 0.017994 | Mitogen-activated protein kinase 11                                            |
| 295 | AK022583  |               | 8 | 8  | 0.018019 | CDNA FLJ46713 fis, clone TRACH3016885                                          |

|     |           |          |   |    |          |                                                                            |
|-----|-----------|----------|---|----|----------|----------------------------------------------------------------------------|
| 296 | AK021932  | FBXL7    | 7 | 8  | 0.018042 | F-box and leucine-rich repeat protein 7                                    |
| 297 | AK021561  | ETNK2    | 8 | 8  | 0.018094 | Ethanolamine kinase 2                                                      |
| 298 | AF290204  | DO       | 5 | 10 | 0.018214 | Dombrock blood group                                                       |
| 299 | AF147440  | KNSL7    | 6 | 6  | 0.018227 | Kinesin family member 15                                                   |
| 300 | AK001604  | MAML3    | 8 | 10 | 0.018308 | Mastermind-like 3 (Drosophila)                                             |
| 301 | NM_000954 | PTGDS    | 7 | 8  | 0.018323 | Prostaglandin D2 synthase 21kDa (brain)                                    |
| 302 | NM_004789 | LHX2     | 8 | 9  | 0.018327 | LIM homeobox 2                                                             |
| 303 | NM_017882 | CLN6     | 8 | 9  | 0.018482 | Ceroid-lipofuscinosis, neuronal 6, late infantile, variant                 |
| 304 | AK024182  |          | 7 | 10 | 0.018539 | Data not found                                                             |
| 305 | NM_001507 | MLNR     | 6 | 7  | 0.018550 | Motilin receptor                                                           |
| 306 | NM_003339 | UBE2D2   | 8 | 11 | 0.018591 | Ubiquitin-conjugating enzyme E2D 2 (UBC4/5 homolog, yeast)                 |
| 307 | NM_001352 | DBP      | 8 | 11 | 0.018594 | D site of albumin promoter (albumin D-box) binding protein                 |
| 308 | U84505    |          | 6 | 9  | 0.018605 | Data not found                                                             |
| 309 | NM_005777 | RBM6     | 7 | 11 | 0.018641 | RNA binding motif protein 6                                                |
| 310 | X89667    | OR1Q1    | 6 | 8  | 0.018661 | Olfactory receptor, family 1, subfamily Q, member 1                        |
| 311 | NM_014170 | HSPC135  | 8 | 10 | 0.018664 | HSPC135 protein                                                            |
| 312 | NM_000697 | ALOX12   | 6 | 9  | 0.018698 | Arachidonate 12-lipoxygenase                                               |
| 313 | NM_001420 | ELAVL3   | 8 | 11 | 0.018709 | ELAV (embryonic lethal, abnormal vision, Drosophila)-like 3 (Hu antigen C) |
| 314 | NM_002823 | PTMA     | 8 | 11 | 0.018739 | Prothymosin, alpha (gene sequence 28)                                      |
| 315 | NM_014079 | KLF15    | 7 | 11 | 0.018806 | Kruppel-like factor 15                                                     |
| 316 | NM_018558 | GABRQ    | 6 | 9  | 0.018817 | Gamma-aminobutyric acid (GABA) receptor, theta                             |
| 317 | NM_017720 | STAP2    | 6 | 10 | 0.018866 | Signal-transducing adaptor protein-2                                       |
| 318 | AJ227874  |          | 7 | 8  | 0.018955 | Hypothetical gene supported by AK096370                                    |
| 319 | NM_017998 | C9orf40  | 7 | 9  | 0.019158 | Chromosome 9 open reading frame 40                                         |
| 320 | NM_004265 | FADS2    | 7 | 11 | 0.019198 | Fatty acid desaturase 2                                                    |
| 321 | NM_015720 | PODXL2   | 7 | 9  | 0.019329 | Podocalyxin-like 2                                                         |
| 322 | NM_000898 | MAOB     | 5 | 10 | 0.019350 | Monoamine oxidase B                                                        |
| 323 | NM_006344 | CLECSF14 | 8 | 8  | 0.019373 | C-type lectin domain family 10, member A                                   |
| 324 | NM_003260 | TLE2     | 6 | 11 | 0.019404 | Transducin-like enhancer of split 2 (E(sp1) homolog, Drosophila)           |
| 325 | AL390152  | RPS6KL1  | 6 | 8  | 0.019411 | Ribosomal protein S6 kinase-like 1                                         |
| 326 | NM_020379 | MAN1C1   | 6 | 9  | 0.019418 | Mannosidase, alpha, class 1C, member 1                                     |
| 327 | AL110204  |          | 7 | 10 | 0.019544 | MRNA; cDNA DKFZp586K1922 (from clone DKFZp586K1922)                        |
| 328 | NM_015696 | GPX7     | 7 | 10 | 0.019600 | Glutathione peroxidase 7                                                   |

|     |           |          |   |    |          |                                                                                                          |
|-----|-----------|----------|---|----|----------|----------------------------------------------------------------------------------------------------------|
| 329 | AL096747  |          | 7 | 11 | 0.019652 | Data not found                                                                                           |
| 330 | L37717    |          | 6 | 9  | 0.019689 | Similar to hypothetical gene supported by BC031617                                                       |
| 331 | AL137431  | WBSCR17  | 7 | 9  | 0.019722 | Williams-Beuren syndrome chromosome region 17                                                            |
| 332 | AK024947  | CTBP2    | 6 | 6  | 0.019912 | C-terminal binding protein 2                                                                             |
| 333 | AK024278  | CD99L2   | 8 | 11 | 0.019934 | CD99 antigen-like 2                                                                                      |
| 334 | D17129    | COX4I1   | 8 | 11 | 0.020005 | Cytochrome c oxidase subunit IV isoform 1                                                                |
| 335 | NM_000722 | CACNA2D1 | 8 | 11 | 0.020144 | Calcium channel, voltage-dependent, alpha 2/delta subunit 1                                              |
| 336 | U77088    | TK2      | 8 | 11 | 0.020206 | Thymidine kinase 2, mitochondrial                                                                        |
| 337 | AL117661  | TAF3     | 8 | 10 | 0.020265 | TAF3 RNA polymerase II, TATA box binding protein (TBP)-associated factor, 140kDa                         |
| 338 | AK025051  | ACTR2    | 5 | 10 | 0.020350 | ARP2 actin-related protein 2 homolog (yeast)                                                             |
| 339 | NM_003058 | SLC22A2  | 6 | 9  | 0.020369 | Solute carrier family 22 (organic cation transporter), member 2                                          |
| 340 | NM_000796 | DRD3     | 6 | 10 | 0.020382 | Dopamine receptor D3                                                                                     |
| 341 | AB046802  | TNRC6C   | 7 | 11 | 0.020499 | Trinucleotide repeat containing 6C                                                                       |
| 342 | NM_001196 | BID      | 6 | 10 | 0.020509 | BH3 interacting domain death agonist                                                                     |
| 343 | U21072    |          | 7 | 7  | 0.020524 | Data not found                                                                                           |
| 344 | AK025218  | KIAA1579 | 7 | 9  | 0.020571 | Hypothetical protein FLJ10770                                                                            |
| 345 | NM_000803 | FOLR2    | 7 | 9  | 0.020675 | Folate receptor 2 (fetal)<br>CDNA FLJ16241 fis, clone HCASM2008536, weakly similar to DNA-REPAIR PROTEIN |
| 346 | AK021566  |          | 5 | 11 | 0.020775 | XRCC1                                                                                                    |
| 347 | AF161434  | CIP29    | 8 | 11 | 0.020842 | Cytokine induced protein 29 kDa                                                                          |
| 348 | AJ008141  | MAP3K14  | 5 | 10 | 0.021064 | Mitogen-activated protein kinase kinase kinase 14                                                        |
| 349 | AK022696  | MGA      | 8 | 11 | 0.021187 | MAX gene associated                                                                                      |
| 350 | NM_014148 |          | 5 | 8  | 0.021234 | Data not found                                                                                           |
| 351 | AB002318  | TLN2     | 8 | 11 | 0.021381 | Talin 2                                                                                                  |
| 352 | D55644    | PCDH17   | 7 | 8  | 0.021414 | Protocadherin 17                                                                                         |
| 353 | NM_018105 | THAP1    | 6 | 11 | 0.021500 | THAP domain containing, apoptosis associated protein 1                                                   |
| 354 | AK027252  | ATP8A1   | 5 | 8  | 0.021534 | ATPase, aminophospholipid transporter (APLT), Class I, type 8A, member 1                                 |
| 355 | NM_006428 | MRPL28   | 7 | 11 | 0.021546 | Mitochondrial ribosomal protein L28                                                                      |
| 356 | AK000216  | FLJ20209 | 6 | 10 | 0.021590 | Hypothetical protein FLJ20209                                                                            |
| 357 | NM_019853 |          | 6 | 10 | 0.021661 | Data not found                                                                                           |
| 358 | M30773    |          | 6 | 10 | 0.021728 | Data not found                                                                                           |
| 359 | NM_003800 | RNGTT    | 8 | 10 | 0.021793 | RNA guanylyltransferase and 5'-phosphatase                                                               |
| 360 | NM_017699 | SIDT1    | 7 | 8  | 0.021850 | Hypothetical protein FLJ21394                                                                            |
| 361 | AB000520  | APS      | 7 | 11 | 0.021893 | Adaptor protein with pleckstrin homology and src homology 2 domains                                      |

|     |           |              |   |    |          |                                                                                 |
|-----|-----------|--------------|---|----|----------|---------------------------------------------------------------------------------|
| 362 | X57566    |              | 8 | 9  | 0.021915 | Data not found                                                                  |
| 363 | NM_014166 | MED4         | 8 | 11 | 0.021944 | Mediator of RNA polymerase II transcription, subunit 4 homolog (yeast)          |
| 364 | AF056453  |              | 7 | 7  | 0.021988 | Clone TEE3 Cri-du-chat critical region mRNA                                     |
| 365 | NM_016931 | NOX4         | 8 | 11 | 0.022023 | NADPH oxidase 4                                                                 |
| 366 | AK023018  |              | 5 | 7  | 0.022041 | CDNA FLJ12956 fis, clone NT2RP2005501                                           |
| 367 | NM_016307 | PRRX2        | 8 | 11 | 0.022043 | Paired related homeobox 2                                                       |
| 368 | AK021833  | CPSF6        | 6 | 10 | 0.022067 | Cleavage and polyadenylation specific factor 6, 68kDa                           |
| 369 | AB040916  | ZBTB2        | 7 | 11 | 0.022093 | Zinc finger and BTB domain containing 2                                         |
| 370 | AL080216  | TRIM33       | 5 | 8  | 0.022142 | Tripartite motif-containing 33                                                  |
| 371 | AK001082  | BOMB         | 6 | 9  | 0.022146 | BH3-only member B protein                                                       |
| 372 | NM_003152 | STAT5A       | 7 | 11 | 0.022178 | Signal transducer and activator of transcription 5A                             |
| 373 | NM_017875 | FLJ20551     | 7 | 11 | 0.022213 | Hypothetical protein FLJ20551                                                   |
| 374 | NM_012241 | SIRT5        | 8 | 11 | 0.022232 | Sirtuin (silent mating type information regulation 2 homolog) 5 (S. cerevisiae) |
| 375 | NM_006702 | NTE          | 8 | 10 | 0.022311 | Neuropathy target esterase                                                      |
| 376 | AL122073  | MGC10334     | 7 | 10 | 0.022344 | Hypothetical protein MGC10334                                                   |
| 377 | AL110133  |              | 7 | 10 | 0.022351 | MRNA; cDNA DKFZp564H072 (from clone DKFZp564H072)                               |
| 378 | NM_018263 | ASXL2        | 8 | 10 | 0.022420 | Additional sex combs like 2 (Drosophila)                                        |
| 379 | AK025586  | SPATA13      | 5 | 11 | 0.022563 | Spermatogenesis associated 13                                                   |
| 380 | M96652    | IL5RA        | 7 | 9  | 0.022616 | Interleukin 5 receptor, alpha                                                   |
| 381 | NM_000207 | INS          | 8 | 11 | 0.022659 | Insulin                                                                         |
| 382 | AB011168  | MAPKBP1      | 7 | 6  | 0.022823 | Mitogen activated protein kinase binding protein 1                              |
| 383 | AK024211  | DEAF1        | 7 | 8  | 0.022907 | Deformed epidermal autoregulatory factor 1 (Drosophila)                         |
| 384 | AK026700  | LRR1Q2       | 8 | 6  | 0.022922 | Leucine-rich repeats and IQ motif containing 2                                  |
| 385 | AL122044  | DKFZP566N034 | 7 | 9  | 0.022943 | Hypothetical protein DKFZp566N034                                               |
| 386 | AK026414  | FLJ22761     | 7 | 11 | 0.023110 | Hexokinase domain containing 1                                                  |
| 387 | NM_018949 | UTS2R        | 5 | 9  | 0.023128 | Urotensin 2 receptor                                                            |
| 388 | AL133094  | PHF10        | 7 | 9  | 0.023165 | Chromosome 6 open reading frame 120                                             |
| 389 | AK025143  | EXT1         | 6 | 8  | 0.023179 | Exostoses (multiple) 1                                                          |
| 390 | AB033062  | KIF26A       | 8 | 11 | 0.023212 | Kinesin family member 26A                                                       |
| 391 | NM_001260 | CDK8         | 7 | 7  | 0.023239 | Cyclin-dependent kinase 8                                                       |
| 392 | AK022071  |              | 7 | 9  | 0.023352 | Data not found                                                                  |
| 393 | AK021752  | LOC283464    | 7 | 9  | 0.023364 | Hypothetical protein LOC283464                                                  |
| 394 | AB037791  | FLJ10980     | 7 | 11 | 0.023404 | Hypothetical protein FLJ10980                                                   |

|     |           |           |   |    |          |                                                                                      |
|-----|-----------|-----------|---|----|----------|--------------------------------------------------------------------------------------|
| 395 | NM_000132 | F8        | 7 | 10 | 0.023419 | Coagulation factor VIII, procoagulant component (hemophilia A)                       |
| 396 | AF070632  |           | 6 | 9  | 0.023426 | Clone 24405 mRNA sequence                                                            |
| 397 | AK022603  | STRA6     | 6 | 8  | 0.023460 | Stimulated by retinoic acid gene 6 homolog (mouse)                                   |
| 398 | AF103907  | KIAA0367  | 5 | 8  | 0.023606 | KIAA0367                                                                             |
| 399 | AL133086  |           | 8 | 9  | 0.023612 | MRNA; cDNA DKFZp434D1028 (from clone DKFZp434D1028)                                  |
| 400 | NM_003645 | SLC27A2   | 8 | 10 | 0.023640 | Solute carrier family 27 (fatty acid transporter), member 2                          |
| 401 | AK021574  |           | 6 | 7  | 0.023705 | Similar to CG9996-PA                                                                 |
| 402 | AJ227909  |           | 8 | 10 | 0.023749 | Partial mRNA; ID LG43-4B1                                                            |
| 403 | NM_000877 | IL1R1     | 8 | 10 | 0.023865 | Interleukin 1 receptor, type I                                                       |
| 404 | AL080221  | PLEKHJ1   | 8 | 10 | 0.023945 | Pleckstrin homology domain containing, family J member 1                             |
| 405 | NM_015909 | NAG       | 7 | 9  | 0.024053 | Neuroblastoma-amplified protein                                                      |
| 406 | AL117474  | LOC253039 | 8 | 10 | 0.024058 | Hypothetical protein LOC253039                                                       |
| 407 | L25346    | ZNF19     | 5 | 9  | 0.024169 | Zinc finger protein 19 (KOX 12)                                                      |
| 408 | AK022163  |           | 5 | 6  | 0.024189 | CDNA FLJ12101 fis, clone HEMBB1002683                                                |
| 409 | AF086105  | ZNF331    | 8 | 11 | 0.024265 | Zinc finger protein 331                                                              |
| 410 | NM_004089 | DSIPI     | 8 | 11 | 0.024287 | TSC22 domain family, member 3                                                        |
| 411 | AK024035  | KIAA1160  | 8 | 11 | 0.024300 | KIAA1160 protein                                                                     |
| 412 | AY010111  | CDH23     | 6 | 11 | 0.024353 | Cadherin-like 23                                                                     |
| 413 | AF130086  | MAP2K5    | 7 | 8  | 0.024472 | Mitogen-activated protein kinase kinase 5                                            |
| 414 | NM_006420 | ARFGEF2   | 8 | 9  | 0.024490 | ADP-ribosylation factor guanine nucleotide-exchange factor 2 (brefeldin A-inhibited) |
| 415 | NM_004551 | NDUFS3    | 8 | 8  | 0.024600 | NADH dehydrogenase (ubiquinone) Fe-S protein 3, 30kDa (NADH-coenzyme Q reductase)    |
| 416 | AK027119  | FKBPL     | 8 | 8  | 0.024619 | FK506 binding protein like                                                           |
| 417 | AK022743  | FLJ12681  | 6 | 9  | 0.024736 | Hypothetical protein FLJ12681                                                        |
| 418 | NM_003119 | SPG7      | 8 | 11 | 0.024815 | Spastic paraplegia 7, paraplegin (pure and complicated autosomal recessive)          |
| 419 | AK023457  | RAP1A     | 6 | 9  | 0.024816 | RAP1A, member of RAS oncogene family                                                 |
| 420 | NM_012451 | SYNGR4    | 8 | 10 | 0.024858 | Synaptogyrin 4                                                                       |
