# Supplementary material
Source: PubMed Central journal article supplement (PMC1860543)
Supplement: jclinpath_jcp.2005.035451_4.pdf [file jclinpath_jcp.2005.035451_4.pdf]

## Complimentary information 4: Upregulated in metastasized HNSCC vs non-metastasized

| Ranknumber | GEN_ID    | Symbol   | Non-meta (N) | Meta (N) | P-student   | Description                                                                                        |
|------------|-----------|----------|--------------|----------|-------------|----------------------------------------------------------------------------------------------------|
| 1          | NM_004403 | DFNA5    | 7            | 11       | 0.999919403 | Deafness, autosomal dominant 5                                                                     |
| 2          | NM_005909 | MAP1B    | 6            | 11       | 0.999855502 | Microtubule-associated protein 1B                                                                  |
| 3          | X82545    | PRNP     | 8            | 11       | 0.999757463 | Prion protein (p27-30) (Creutzfeld-Jakob disease)                                                  |
| 4          | AL049984  | RAB6A    | 6            | 6        | 0.999749136 | RAB6A, member RAS oncogene family                                                                  |
| 5          | AK002089  | VGCNL1   | 8            | 10       | 0.999672344 | Voltage gated channel like 1                                                                       |
| 6          | AK022068  |          | 5            | 11       | 0.999605918 | CDNA FLJ12006 fis, clone HEMBB1001585                                                              |
| 7          | NM_005512 | GARP     | 7            | 11       | 0.999593931 | Leucine rich repeat containing 32                                                                  |
| 8          | NM_017762 | FLJ20313 | 8            | 11       | 0.999511819 | Myotubularin related protein 10                                                                    |
| 9          | NM_017802 | FLJ20397 | 8            | 10       | 0.999476416 | Hypothetical protein FLJ20397                                                                      |
| 10         | NM_000243 | MEFV     | 8            | 11       | 0.99947301  | Mediterranean fever                                                                                |
| 11         | D90070    | PMAIP1   | 8            | 11       | 0.999468892 | Phorbol-12-myristate-13-acetate-induced protein 1                                                  |
| 12         | NM_003345 | UBE2I    | 8            | 11       | 0.999318589 | Ubiquitin-conjugating enzyme E2I (UBC9 homolog, yeast)                                             |
| 13         | NM_016281 | RPS2     | 8            | 11       | 0.999245045 | Ribosomal protein S2                                                                               |
| 14         | NM_001387 | DPYSL3   | 7            | 11       | 0.999218707 | Dihydropyrimidinase-like 3                                                                         |
| 15         | NM_014426 | SNX5     | 8            | 11       | 0.999214819 | Sorting nexin 5                                                                                    |
| 16         | AK022728  | FLJ12666 | 8            | 11       | 0.999210599 | Chromosome 1 open reading frame 108                                                                |
| 17         | AK022384  | FLJ34870 | 7            | 5        | 0.999203884 | FLJ34870 protein                                                                                   |
| 18         | NM_002589 | PCDH7    | 8            | 11       | 0.998990912 | BH-protocadherin (brain-heart)                                                                     |
| 19         | NM_014909 | KIAA1036 | 7            | 9        | 0.998811479 | KIAA1036                                                                                           |
| 20         | NM_007353 | GNA12    | 8            | 11       | 0.998800479 | Guanine nucleotide binding protein (G protein) alpha 12                                            |
| 21         | NM_012280 | FTSJ1    | 8            | 10       | 0.998714682 | FtsJ homolog 1 (E. coli)                                                                           |
| 22         | AK023071  | SAV1     | 8            | 11       | 0.998702081 | Salvador homolog 1 (Drosophila)                                                                    |
| 23         | L08438    | RANBP17  | 5            | 9        | 0.998700772 | RAN binding protein 17                                                                             |
| 24         | NM_005499 | UBA2     | 8            | 11       | 0.998597031 | SUMO-1 activating enzyme subunit 2                                                                 |
| 25         | M26123    | SERPINA1 | 8            | 11       | 0.998566216 | Serine (or cysteine) proteinase inhibitor, clade A (alpha-1 antiproteinase, antitrypsin), member 1 |
| 26         | NM_001938 | DR1      | 8            | 11       | 0.998526459 | Down-regulator of transcription 1, TBP-binding (negative cofactor 2)                               |
| 27         | NM_001319 | CSNK1G2  | 6            | 9        | 0.998525662 | Casein kinase 1, gamma 2                                                                           |
| 28         | AK025209  | COQ6     | 8            | 11       | 0.998504702 | Coenzyme Q6 homolog (yeast)                                                                        |
| 29         | NM_018022 | FLJ10199 | 8            | 11       | 0.99850251  | Transmembrane protein 51                                                                           |
| 30         | NM_004781 | VAMP3    | 8            | 10       | 0.998492939 | Vesicle-associated membrane protein 3 (cellubrevin)                                                |
| 31         | AF085865  | STYX     | 8            | 10       | 0.998461297 | Serine/threonine/tyrosine interacting protein                                                      |

|    |           |           |   |    |             |                                                                                                     |
|----|-----------|-----------|---|----|-------------|-----------------------------------------------------------------------------------------------------|
| 32 | AK024601  | FAM3A     | 8 | 11 | 0.998451957 | Family with sequence similarity 3, member A                                                         |
| 33 | NM_001259 | CDK6      | 8 | 11 | 0.998376019 | Cyclin-dependent kinase 6                                                                           |
| 34 | NM_014145 | C20orf30  | 8 | 11 | 0.998374637 | Chromosome 20 open reading frame 30                                                                 |
| 35 | NM_005923 | MAP3K5    | 8 | 11 | 0.99836159  | Mitogen-activated protein kinase kinase kinase 5                                                    |
| 36 | NM_017447 | C21orf91  | 8 | 11 | 0.998222471 | Chromosome 21 open reading frame 91                                                                 |
| 37 | NM_012405 | ICMT      | 8 | 11 | 0.998193756 | Isoprenylcysteine carboxyl methyltransferase                                                        |
| 38 | NM_019095 | C20orf155 | 8 | 11 | 0.998192901 | Chromosome 20 open reading frame 155                                                                |
| 39 | AK021674  | NFIA      | 5 | 9  | 0.998134981 | Nuclear factor I/A                                                                                  |
| 40 | NM_006622 | PLK2      | 8 | 11 | 0.998075997 | Polo-like kinase 2 (Drosophila)                                                                     |
| 41 | AJ012499  | MGC40157  | 6 | 7  | 0.998038005 | Hypothetical protein MGC40157                                                                       |
| 42 | NM_014601 | EHD2      | 8 | 11 | 0.998030293 | EH-domain containing 2                                                                              |
| 43 | NM_006195 | PBX3      | 8 | 11 | 0.997943236 | Pre-B-cell leukemia transcription factor 3                                                          |
| 44 | NM_005382 | NEF3      | 8 | 9  | 0.99788957  | Neurofilament 3 (150kDa medium)                                                                     |
| 45 | NM_001414 | EIF2B1    | 8 | 11 | 0.997766113 | Eukaryotic translation initiation factor 2B, subunit 1 alpha, 26kDa                                 |
| 46 | AK023501  |           | 8 | 11 | 0.997649742 | Hypothetical gene supported by AK023501                                                             |
| 47 | AK026403  | TLN2      | 8 | 10 | 0.9976228   | Talin 2                                                                                             |
| 48 | AL137663  | PHLDB2    | 6 | 10 | 0.997564758 | Pleckstrin homology-like domain, family B, member 2                                                 |
| 49 | D26488    | WDR43     | 8 | 11 | 0.997490025 | WD repeat domain 43                                                                                 |
| 50 | AL049988  | ITPR2     | 7 | 9  | 0.997446316 | Inositol 1,4,5-triphosphate receptor, type 2                                                        |
| 51 | NM_017955 | CDCA4     | 8 | 11 | 0.997374257 | Cell division cycle associated 4                                                                    |
| 52 | AF088025  |           | 5 | 9  | 0.9973386   | Similar to RIKEN cDNA 9930021J17                                                                    |
| 53 | NM_004766 | COPB2     | 8 | 10 | 0.997297592 | Coatamer protein complex, subunit beta 2 (beta prime)                                               |
| 54 | NM_000854 | GSTT2     | 8 | 11 | 0.997267685 | Glutathione S-transferase theta 2                                                                   |
| 55 | NM_018279 | TMEM19    | 8 | 8  | 0.997217052 | Transmembrane protein 19                                                                            |
| 56 | NM_002045 | GAP43     | 6 | 10 | 0.997208674 | Growth associated protein 43                                                                        |
| 57 | NM_005207 | CRKL      | 8 | 11 | 0.997204831 | V-crk sarcoma virus CT10 oncogene homolog (avian)-like                                              |
| 58 | AK024567  |           | 7 | 7  | 0.997169277 | CDNA: FLJ20914 fis, clone ADSE00646                                                                 |
| 59 | AK023204  | LAP1B     | 7 | 11 | 0.997022974 | Torsin A interacting protein 1                                                                      |
| 60 | NM_002728 | PRG2      | 8 | 10 | 0.996931247 | Proteoglycan 2, bone marrow (natural killer cell activator, eosinophil granule major basic protein) |
| 61 | AL137356  | NRXN2     | 6 | 5  | 0.996920281 | Neurexin 2                                                                                          |
| 62 | AK024674  |           | 6 | 9  | 0.996907993 | Data not found                                                                                      |
| 63 | NM_002745 | MAPK1     | 8 | 11 | 0.99690712  | Mitogen-activated protein kinase 1                                                                  |
| 64 | NM_001163 | APBA1     | 8 | 11 | 0.996813161 | Amyloid beta (A4) precursor protein-binding, family A, member 1 (X11)                               |

|    |           |          |   |    |             |                                                                        |
|----|-----------|----------|---|----|-------------|------------------------------------------------------------------------|
| 65 | AF283645  | MFTC     | 8 | 11 | 0.996776053 | Mitochondrial folate transporter/carrier                               |
| 66 | NM_003129 | SQLE     | 8 | 11 | 0.996773104 | Squalene epoxidase                                                     |
| 67 | NM_007342 | NUPL2    | 8 | 11 | 0.99675988  | Nucleoporin like 2                                                     |
| 68 | NM_014344 | FJX1     | 8 | 10 | 0.996697171 | Four jointed box 1 (Drosophila)                                        |
| 69 | NM_006350 | FST      | 8 | 11 | 0.996649535 | Follistatin                                                            |
| 70 | NM_013444 | UBQLN2   | 8 | 11 | 0.996645761 | Ubiquilin 2                                                            |
| 71 | NM_005723 | TM4SF9   | 8 | 9  | 0.996593807 | Tetraspanin 5                                                          |
| 72 | NM_018312 | C11orf23 | 7 | 11 | 0.996502316 | Chromosome 11 open reading frame 23                                    |
| 73 | NM_012283 | KCNG2    | 6 | 9  | 0.996461476 | Potassium voltage-gated channel, subfamily G, member 2                 |
| 74 | NM_007031 | HSF2BP   | 6 | 9  | 0.996436748 | Heat shock transcription factor 2 binding protein                      |
| 75 | NM_012307 | EPB41L3  | 8 | 11 | 0.996400886 | Erythrocyte membrane protein band 4.1-like 3                           |
| 76 | NM_004858 | SLC4A8   | 7 | 11 | 0.996321236 | Solute carrier family 4, sodium bicarbonate cotransporter, member 8    |
| 77 | AK025003  | DNAJC7   | 8 | 9  | 0.996319634 | DnaJ (Hsp40) homolog, subfamily C, member 7                            |
| 78 | AK022391  | RNF133   | 6 | 7  | 0.996097923 | Ring finger protein 133                                                |
| 79 | NM_001883 | CRHR2    | 7 | 10 | 0.99607055  | Corticotropin releasing hormone receptor 2                             |
| 80 | AK024174  |          | 8 | 11 | 0.996037977 | Hypothetical LOC388969                                                 |
| 81 | AK026031  | PQLC1    | 8 | 11 | 0.996030706 | PQ loop repeat containing 1                                            |
| 82 | NM_003488 | AKAP1    | 8 | 11 | 0.995981676 | A kinase (PRKA) anchor protein 1                                       |
| 83 | AK024996  | RNF38    | 8 | 11 | 0.995979075 | Ring finger protein 38                                                 |
| 84 | NM_020350 | AGTRAP   | 8 | 11 | 0.995976855 | Angiotensin II receptor-associated protein                             |
| 85 | AF151831  | KBTD2    | 7 | 10 | 0.995976108 | Kelch repeat and BTB (POZ) domain containing 2                         |
| 86 | NM_003289 | TPM2     | 8 | 11 | 0.995864909 | Tropomyosin 2 (beta)                                                   |
| 87 | U57341    |          | 6 | 11 | 0.995765928 | Data not found                                                         |
| 88 | AF069137  | IQSEC2   | 6 | 8  | 0.995710235 | IQ motif and Sec7 domain 2                                             |
| 89 | M62402    | IGFBP6   | 8 | 10 | 0.995706484 | Insulin-like growth factor binding protein 6                           |
| 90 | NM_000277 | PAH      | 8 | 10 | 0.9956429   | Phenylalanine hydroxylase                                              |
| 91 | NM_004648 |          | 7 | 11 | 0.995611944 | Data not found                                                         |
| 92 | L20686    | SOS2     | 7 | 11 | 0.995583056 | Son of sevenless homolog 2 (Drosophila)                                |
| 93 | NM_004855 | PIGB     | 8 | 10 | 0.995529935 | Phosphatidylinositol glycan, class B                                   |
| 94 | AK024848  | GREM2    | 8 | 10 | 0.995501758 | Gremlin 2, cysteine knot superfamily, homolog (Xenopus laevis)         |
| 95 | AF075088  | NEDD4L   | 6 | 8  | 0.995376178 | Neural precursor cell expressed, developmentally down-regulated 4-like |
| 96 | NM_002020 | FLT4     | 8 | 11 | 0.995344303 | Fms-related tyrosine kinase 4                                          |
| 97 | AL079280  |          | 8 | 11 | 0.995318827 | Data not found                                                         |

|     |           |               |   |    |             |                                                                                        |
|-----|-----------|---------------|---|----|-------------|----------------------------------------------------------------------------------------|
| 98  | NM_006379 | SEMA3C        | 8 | 11 | 0.995282845 | Sema domain, immunoglobulin domain (Ig), short basic domain, secreted, (semaphorin) 3C |
| 99  | NM_018010 | ESRRBL1       | 8 | 11 | 0.995195497 | Estrogen-related receptor beta like 1                                                  |
| 100 | AK026325  | PAQR6         | 8 | 11 | 0.995193316 | Progesterin and adipoQ receptor family member VI                                       |
| 101 | NM_014597 | ERBP          | 7 | 11 | 0.995188654 | Estrogen receptor binding protein                                                      |
| 102 | NM_005402 | RALA          | 8 | 11 | 0.995178619 | V-ral simian leukemia viral oncogene homolog A (ras related)                           |
| 103 | AB032991  | NDFIP2        | 8 | 11 | 0.995154176 | Nedd4 family interacting protein 2                                                     |
| 104 | AK023807  | ANAPC1        | 8 | 11 | 0.994851682 | Anaphase promoting complex subunit 1                                                   |
| 105 | NM_005808 | CTDSPL        | 8 | 11 | 0.994596475 | CTD (carboxy-terminal domain, RNA polymerase II, polypeptide A) small phosphatase-like |
| 106 | AK024533  | AVPI1         | 8 | 8  | 0.994595554 | Arginine vasopressin-induced 1                                                         |
| 107 | L09268    | SKIIP         | 7 | 9  | 0.994582056 | SKI interacting protein                                                                |
| 108 | NM_014548 | TMOD2         | 7 | 9  | 0.994577272 | Tropomodulin 2 (neuronal)                                                              |
| 109 | AK024978  | C14orf43      | 8 | 11 | 0.994573414 | Chromosome 14 open reading frame 43                                                    |
| 110 | AF113683  |               | 8 | 11 | 0.994558164 | Data not found                                                                         |
| 111 | NM_015641 | TES           | 8 | 11 | 0.994532244 | Testis derived transcript (3 LIM domains)                                              |
| 112 | AK024228  | FLJ14166      | 6 | 9  | 0.994499153 | Hypothetical protein FLJ14166                                                          |
| 113 | NM_003188 | MAP3K7        | 7 | 11 | 0.994496656 | Mitogen-activated protein kinase kinase kinase 7                                       |
| 114 | AK023058  | PLXNA2        | 8 | 5  | 0.994495993 | Plexin A2                                                                              |
| 115 | AF086059  | LOC283480     | 8 | 7  | 0.9944944   | Hypothetical protein LOC283481                                                         |
| 116 | NM_002744 | PRKCZ         | 8 | 11 | 0.994449199 | Protein kinase C, zeta                                                                 |
| 117 | NM_004556 | NFKBIE        | 8 | 11 | 0.994403929 | Nuclear factor of kappa light polypeptide gene enhancer in B-cells inhibitor, epsilon  |
| 118 | NM_002035 | FVT1          | 8 | 10 | 0.994402647 | Follicular lymphoma variant translocation 1                                            |
| 119 | AL157423  |               | 8 | 6  | 0.994384028 | Data not found                                                                         |
| 120 | NM_014485 | PGDS          | 8 | 11 | 0.994375618 | Prostaglandin D2 synthase, hematopoietic                                               |
| 121 | NM_007188 | ABCB8         | 8 | 11 | 0.994348859 | ATP-binding cassette, sub-family B (MDR/TAP), member 8                                 |
| 122 | AK025943  | KIAA2002      | 8 | 11 | 0.994312226 | KIAA2002 protein                                                                       |
| 123 | AK024511  | NUP98         | 5 | 11 | 0.994298993 | Nucleoporin 98kDa                                                                      |
| 124 | NM_020183 | ARNTL2        | 8 | 11 | 0.994189577 | Aryl hydrocarbon receptor nuclear translocator-like 2                                  |
| 125 | AK023569  | DKFZP564G2022 | 8 | 11 | 0.994071215 | DKFZP564G2022 protein                                                                  |
| 126 | NM_005339 | HIP2          | 7 | 11 | 0.994059465 | Huntingtin interacting protein 2                                                       |
| 127 | AF216381  | CCNB1IP1      | 8 | 11 | 0.994045306 | Cyclin B1 interacting protein 1                                                        |
| 128 | AK026235  | FLJ22582      | 6 | 6  | 0.994043392 | BAI1-associated protein 2-like 2                                                       |
| 129 | NM_005659 | UFD1L         | 8 | 11 | 0.994009414 | Ubiquitin fusion degradation 1-like                                                    |
| 130 | NM_020484 |               | 5 | 8  | 0.9939858   | Data not found                                                                         |

|     |           |              |   |    |             |                                                                                       |
|-----|-----------|--------------|---|----|-------------|---------------------------------------------------------------------------------------|
| 131 | AK025703  | LOC401152    | 8 | 10 | 0.993951277 | HCV F-transactivated protein 1                                                        |
| 132 | AK023472  | DKFZp761B107 | 8 | 11 | 0.993921517 | Hypothetical protein DKFZp761B107                                                     |
| 133 | U84510    | ARVCF        | 5 | 9  | 0.993853444 | Armadillo repeat gene deletes in velocardiofacial syndrome                            |
| 134 | AB033029  | USP31        | 8 | 11 | 0.993798443 | Ubiquitin specific protease 31                                                        |
| 135 | NM_005508 | CCR4         | 8 | 10 | 0.993701621 | Chemokine (C-C motif) receptor 4                                                      |
| 136 | AK024129  | CTBP2        | 6 | 6  | 0.993679932 | C-terminal binding protein 2                                                          |
| 137 | AK024292  | SGOL1        | 5 | 5  | 0.993638651 | Shugoshin-like 1 (S. pombe)                                                           |
| 138 | NM_007061 | CDC42EP1     | 7 | 11 | 0.993636042 | CDC42 effector protein (Rho GTPase binding) 1                                         |
| 139 | AK024513  | CAV2         | 8 | 10 | 0.993622051 | Caveolin 2                                                                            |
| 140 | NM_015949 | C7orf20      | 8 | 10 | 0.993615545 | Chromosome 7 open reading frame 20                                                    |
| 141 | NM_006555 | YKT6         | 8 | 10 | 0.993520547 | SNARE protein Ykt6                                                                    |
| 142 | U53532    | DNAH12       | 8 | 10 | 0.993500793 | Dynein, axonemal, heavy polypeptide 12                                                |
| 143 | NM_000362 | TIMP3        | 8 | 11 | 0.993491166 | Tissue inhibitor of metalloproteinase 3 (Sorsby fundus dystrophy, pseudoinflammatory) |
| 144 | NM_012248 | SEPHS2       | 8 | 11 | 0.993484926 | Selenophosphate synthetase 2                                                          |
| 145 | NM_005638 | SYBL1        | 8 | 11 | 0.993440444 | Synaptobrevin-like 1                                                                  |
| 146 | U18910    |              | 8 | 11 | 0.993434403 | Data not found                                                                        |
| 147 | NM_018348 | FLJ11171     | 8 | 10 | 0.993431819 | Hypothetical protein FLJ11171                                                         |
| 148 | NM_005928 | MFGE8        | 7 | 11 | 0.993413979 | Milk fat globule-EGF factor 8 protein                                                 |
| 149 | NM_002859 | PXN          | 5 | 11 | 0.993388409 | Paxillin                                                                              |
| 150 | NM_000187 | HGD          | 8 | 11 | 0.993370193 | Homogentisate 1,2-dioxygenase (homogentisate oxidase)                                 |
| 151 | AF085948  | TJP2         | 6 | 6  | 0.993365739 | Tight junction protein 2 (zona occludens 2)                                           |
| 152 | AF104914  | NIF3L1BP1    | 8 | 10 | 0.993339933 | Ngg1 interacting factor 3 like 1 binding protein 1                                    |
| 153 | NM_014581 | OBP2B        | 7 | 9  | 0.993237804 | Odorant binding protein 2B                                                            |
| 154 | AK021451  | SLC41A3      | 6 | 9  | 0.993207584 | Solute carrier family 41, member 3                                                    |
| 155 | NM_001204 | BMPR2        | 6 | 10 | 0.993200241 | Bone morphogenetic protein receptor, type II (serine/threonine kinase)                |
| 156 | NM_003909 | CPNE3        | 8 | 11 | 0.993195246 | Copine III                                                                            |
| 157 | NM_016567 | BCCIP        | 7 | 11 | 0.993125455 | BRCA2 and CDKN1A interacting protein                                                  |
| 158 | AK021853  | TRIM2        | 5 | 5  | 0.992935263 | Tripartite motif-containing 2                                                         |
| 159 | NM_003246 | THBS1        | 8 | 11 | 0.992815487 | Thrombospondin 1                                                                      |
| 160 | AJ277441  | XYLT1        | 8 | 11 | 0.992769138 | Xylosyltransferase I                                                                  |
| 161 | NM_000786 | CYP51A1      | 8 | 11 | 0.992767923 | Cytochrome P450, family 51, subfamily A, polypeptide 1                                |
| 162 | AB020705  | TRIM37       | 7 | 11 | 0.992724268 | Tripartite motif-containing 37                                                        |
| 163 | NM_003610 | RAE1         | 8 | 11 | 0.992668805 | RAE1 RNA export 1 homolog (S. pombe)                                                  |

|     |           |          |   |    |             |                                                                            |
|-----|-----------|----------|---|----|-------------|----------------------------------------------------------------------------|
| 164 | L37718    |          | 8 | 11 | 0.99266832  | Data not found                                                             |
| 165 | AF119914  | YES1     | 8 | 11 | 0.992600598 | V-yes-1 Yamaguchi sarcoma viral oncogene homolog 1                         |
| 166 | AB011113  | WDR7     | 5 | 8  | 0.992600294 | WD repeat domain 7                                                         |
| 167 | NM_005155 | PPT2     | 8 | 11 | 0.992450556 | Palmitoyl-protein thioesterase 2                                           |
| 168 | NM_004533 | MYBPC2   | 7 | 10 | 0.99241347  | Myosin binding protein C, fast type                                        |
| 169 | NM_006751 | SSFA2    | 8 | 11 | 0.992327875 | Sperm specific antigen 2                                                   |
| 170 | NM_002093 | GSK3B    | 8 | 11 | 0.992294533 | Glycogen synthase kinase 3 beta                                            |
| 171 | NM_004997 | MYBPH    | 8 | 11 | 0.992277824 | Myosin binding protein H                                                   |
| 172 | NM_014048 | MKL2     | 8 | 11 | 0.99219321  | MKL/myocardin-like 2                                                       |
| 173 | AK024456  | FGD2     | 8 | 11 | 0.992173914 | FYVE, RhoGEF and PH domain containing 2                                    |
| 174 | NM_003344 | UBE2H    | 8 | 11 | 0.992150883 | Ubiquitin-conjugating enzyme E2H (UBC8 homolog, yeast)                     |
| 175 | AK025240  | ZNRF2    | 8 | 11 | 0.992121369 | Zinc and ring finger 2                                                     |
| 176 | NM_020243 | TOMM22   | 7 | 11 | 0.992111896 | Translocase of outer mitochondrial membrane 22 homolog (yeast)             |
| 177 | AL122051  | PDZK8    | 8 | 11 | 0.992079742 | PDZ domain containing 8                                                    |
| 178 | NM_016559 | PEX5L    | 8 | 11 | 0.991971142 | Peroxisomal biogenesis factor 5-like                                       |
| 179 | AF182422  | MRPS35   | 8 | 11 | 0.991959949 | Mitochondrial ribosomal protein S35                                        |
| 180 | NM_017631 | FLJ20035 | 7 | 11 | 0.991942214 | Hypothetical protein FLJ20035                                              |
| 181 | NM_001358 | DHX15    | 8 | 11 | 0.991937084 | DEAH (Asp-Glu-Ala-His) box polypeptide 15                                  |
| 182 | AB002374  | KIAA0376 | 8 | 11 | 0.9918949   | KIAA0376 protein                                                           |
| 183 | NM_003798 | CTNNA1   | 8 | 11 | 0.99184693  | Catenin (cadherin-associated protein), alpha-like 1                        |
| 184 | NM_001993 | F3       | 7 | 11 | 0.991837203 | Coagulation factor III (thromboplastin, tissue factor)                     |
| 185 | AK024355  |          | 8 | 11 | 0.991715177 | Full-length cDNA clone CS0DF022YG06 of Fetal brain of Homo sapiens (human) |
| 186 | AB037784  | KIAA1363 | 8 | 11 | 0.991700559 | Arylacetamide deacetylase-like 1                                           |
| 187 | AK025931  | UBXD3    | 7 | 7  | 0.991692979 | UBX domain containing 3                                                    |
| 188 | NM_003489 | NRIP1    | 8 | 11 | 0.991618698 | Nuclear receptor interacting protein 1                                     |
| 189 | AK024242  |          | 6 | 10 | 0.99159273  | CDNA FLJ14180 fis, clone NT2RP2003799                                      |
| 190 | U50383    | SMYD5    | 8 | 11 | 0.991567821 | SMYD family member 5                                                       |
| 191 | NM_002973 | ATXN2    | 5 | 11 | 0.991524532 | Ataxin 2                                                                   |
| 192 | NM_016435 |          | 7 | 11 | 0.991455061 | Data not found                                                             |
| 193 | NM_003088 | FSCN1    | 8 | 11 | 0.991348698 | Fascin homolog 1, actin-bundling protein (Strongylocentrotus purpuratus)   |
| 194 | D31887    | SLC39A14 | 8 | 11 | 0.991292558 | Solute carrier family 39 (zinc transporter), member 14                     |
| 195 | AF016004  |          | 8 | 11 | 0.991087495 | Data not found                                                             |
| 196 | AL122046  | SESTD1   | 7 | 10 | 0.991076104 | SEC14 and spectrin domains 1                                               |

|     |           |              |   |    |             |                                                                                     |
|-----|-----------|--------------|---|----|-------------|-------------------------------------------------------------------------------------|
| 197 | NM_001496 | GFRA3        | 8 | 11 | 0.991062033 | GDNF family receptor alpha 3                                                        |
| 198 | AK000821  | MOV10        | 8 | 11 | 0.990888524 | Mov10, Moloney leukemia virus 10, homolog (mouse)                                   |
| 199 | NM_001946 | DUSP6        | 8 | 11 | 0.99083764  | Dual specificity phosphatase 6                                                      |
| 200 | NM_014671 | UBE3C        | 8 | 11 | 0.990830089 | Ubiquitin protein ligase E3C                                                        |
| 201 | AF086259  | CDON         | 7 | 11 | 0.99078149  | Cell adhesion molecule-related/down-regulated by oncogenes                          |
| 202 | NM_018685 | ANLN         | 8 | 11 | 0.990776891 | Anillin, actin binding protein (scraps homolog, Drosophila)                         |
| 203 | AJ227881  |              | 6 | 6  | 0.990776451 | Partial mRNA; ID LG141-7C                                                           |
| 204 | AF147433  | NUP153       | 6 | 8  | 0.990757438 | Nucleoporin 153kDa                                                                  |
| 205 | NM_017821 | RHBDL2       | 8 | 11 | 0.990754526 | Rhomboid, veinlet-like 2 (Drosophila)                                               |
| 206 | NM_000164 | GIPR         | 8 | 11 | 0.990752904 | Gastric inhibitory polypeptide receptor                                             |
| 207 | AF052146  |              | 7 | 11 | 0.990689122 | CDNA FLJ43660 fis, clone SYNOV4004823                                               |
| 208 | NM_004711 | SYNGR1       | 8 | 11 | 0.990558224 | Synaptogyrin 1                                                                      |
| 209 | AF229162  | CTDSP1       | 8 | 11 | 0.990495808 | CTD (carboxy-terminal domain, RNA polymerase II, polypeptide A) small phosphatase 1 |
| 210 | NM_005233 | EPHA3        | 8 | 11 | 0.99032936  | EPH receptor A3                                                                     |
| 211 | NM_014211 | GABRP        | 8 | 11 | 0.99028474  | Gamma-aminobutyric acid (GABA) A receptor, pi                                       |
| 212 | AK025947  |              | 8 | 11 | 0.990177566 | Data not found                                                                      |
| 213 | AF147444  | LY6G6C       | 7 | 7  | 0.99017403  | Lymphocyte antigen 6 complex, locus G6C                                             |
| 214 | AK025112  |              | 5 | 7  | 0.990166973 | Data not found                                                                      |
| 215 | AK022065  | RAB5A        | 8 | 11 | 0.990150373 | RAB5A, member RAS oncogene family                                                   |
| 216 | NM_001417 | EIF4B        | 8 | 11 | 0.990101445 | Eukaryotic translation initiation factor 4B                                         |
| 217 | AF116655  |              | 8 | 11 | 0.990098373 | Data not found                                                                      |
| 218 | NM_004374 | COX6C        | 8 | 11 | 0.990041589 | Cytochrome c oxidase subunit VIc                                                    |
| 219 | NM_003518 | HIST1H2BG    | 7 | 10 | 0.990006648 | Histone 1, H2bg                                                                     |
| 220 | AK001064  | DKFZp434P055 | 8 | 11 | 0.989995347 | Hypothetical protein DKFZp434P055                                                   |
| 221 | U94354    | LFNG         | 8 | 11 | 0.989869361 | Lunatic fringe homolog (Drosophila)                                                 |
| 222 | NM_005479 | FRAT1        | 8 | 11 | 0.989759297 | Frequently rearranged in advanced T-cell lymphomas                                  |
| 223 | NM_016434 | TNFRSF6B     | 8 | 11 | 0.989749789 | Tumor necrosis factor receptor superfamily, member 6b, decoy                        |
| 224 | NM_017444 | CHRAC1       | 8 | 11 | 0.989704957 | Chromatin accessibility complex 1                                                   |
| 225 | NM_002988 | CCL18        | 8 | 11 | 0.989695037 | Chemokine (C-C motif) ligand 18 (pulmonary and activation-regulated)                |
| 226 | AK023407  | KIAA1856     | 8 | 11 | 0.989686165 | KIAA1856 protein                                                                    |
| 227 | AF142421  |              | 8 | 11 | 0.989672661 | Data not found                                                                      |
| 228 | AL117415  |              | 8 | 10 | 0.989487683 | Data not found                                                                      |
| 229 | L27642    |              | 7 | 6  | 0.989428274 | Data not found                                                                      |

|     |           |          |   |    |             |                                                                               |
|-----|-----------|----------|---|----|-------------|-------------------------------------------------------------------------------|
| 230 | NM_001949 | EIF3     | 8 | 11 | 0.989363616 | E2F transcription factor 3                                                    |
| 231 | AK023602  | R29124_1 | 6 | 6  | 0.989334157 | Carcinoembryonic antigen-related cell adhesion molecule 21                    |
| 232 | NM_012289 | KEAP1    | 8 | 11 | 0.989289355 | Kelch-like ECH-associated protein 1                                           |
| 233 | NM_014018 | MRPS28   | 8 | 9  | 0.989271724 | Mitochondrial ribosomal protein S28                                           |
| 234 | NM_013256 | ZNF180   | 8 | 11 | 0.989267894 | Zinc finger protein 180 (HHZ168)                                              |
| 235 | AK024165  | CXorf36  | 5 | 8  | 0.989241207 | Chromosome X open reading frame 36                                            |
| 236 | NM_014063 | DBNL     | 8 | 11 | 0.989150906 | Drebrin-like                                                                  |
| 237 | NM_003921 | BCL10    | 8 | 11 | 0.989121034 | B-cell CLL/lymphoma 10                                                        |
| 238 | NM_007315 | STAT1    | 8 | 10 | 0.989112788 | Signal transducer and activator of transcription 1, 91kDa                     |
| 239 | AK000493  |          | 7 | 9  | 0.989111197 | CDNA FLJ20486 fis, clone KAT08039                                             |
| 240 | NM_001839 | CNN3     | 8 | 11 | 0.989076434 | Calponin 3, acidic                                                            |
| 241 | NM_000201 | ICAM1    | 8 | 11 | 0.989075486 | Intercellular adhesion molecule 1 (CD54), human rhinovirus receptor           |
| 242 | NM_015839 |          | 8 | 9  | 0.989072561 | Data not found                                                                |
| 243 | AL050263  | SLC1A3   | 8 | 9  | 0.989028928 | Solute carrier family 1 (glial high affinity glutamate transporter), member 3 |
| 244 | U63541    | TFIP11   | 7 | 11 | 0.989013981 | Similar to SRR1-like protein                                                  |
| 245 | NM_014038 | BZW2     | 8 | 11 | 0.988877504 | Basic leucine zipper and W2 domains 2                                         |
| 246 | NM_014309 | RBM9     | 8 | 11 | 0.988865859 | RNA binding motif protein 9                                                   |
| 247 | NM_004161 | RAB1A    | 8 | 11 | 0.988813938 | RAB1A, member RAS oncogene family                                             |
| 248 | AK021700  |          | 6 | 8  | 0.98876796  | LOC440135                                                                     |
| 249 | AK021625  | C6orf139 | 7 | 7  | 0.988745958 | Chromosome 6 open reading frame 139                                           |
| 250 | NM_019613 | WDR45L   | 8 | 11 | 0.988740822 | WDR45-like                                                                    |
| 251 | AJ227875  | FLJ32001 | 8 | 11 | 0.988712466 | Chromosome 1 open reading frame 71                                            |
| 252 | AL133030  | KIAA1666 | 8 | 11 | 0.98843506  | KIAA1666 protein                                                              |
| 253 | NM_006301 | MAP3K12  | 6 | 9  | 0.988433373 | Mitogen-activated protein kinase kinase kinase 12                             |
| 254 | AK000263  | C19orf22 | 8 | 10 | 0.988421489 | Chromosome 19 open reading frame 22                                           |
| 255 | NM_018960 | GNMT     | 8 | 11 | 0.988417132 | Glycine N-methyltransferase                                                   |
| 256 | AF071569  | CAMK2D   | 8 | 10 | 0.988298916 | Calcium/calmodulin-dependent protein kinase (CaM kinase) II delta             |
| 257 | AK023761  | GBF1     | 5 | 10 | 0.988294507 | Golgi-specific brefeldin A resistance factor 1                                |
| 258 | NM_007260 | LYPLA2   | 7 | 11 | 0.988243648 | Lysophospholipase II                                                          |
| 259 | NM_019056 | NDUFB11  | 7 | 11 | 0.988099464 | NADH dehydrogenase (ubiquinone) 1 beta subcomplex, 11, 17.3kDa                |
| 260 | AF083130  |          | 5 | 10 | 0.988097653 | Data not found                                                                |
| 261 | NM_004312 | ARR3     | 8 | 8  | 0.988047853 | Arrestin 3, retinal (X-arrestin)                                              |
| 262 | NM_013281 | FLRT3    | 7 | 9  | 0.988001398 | Fibronectin leucine rich transmembrane protein 3                              |



|     |           |              |   |    |             |                                                                                                 |
|-----|-----------|--------------|---|----|-------------|-------------------------------------------------------------------------------------------------|
| 263 | AB002330  | SR140        | 8 | 11 | 0.987971269 | U2-associated SR140 protein                                                                     |
| 264 | NM_002718 | PPP2R3A      | 7 | 10 | 0.987875315 | Protein phosphatase 2 (formerly 2A), regulatory subunit B", alpha                               |
| 265 | U17640    |              | 6 | 8  | 0.98774778  | Data not found                                                                                  |
| 266 | AF178930  | CARD15       | 6 | 8  | 0.98768811  | Caspase recruitment domain family, member 15                                                    |
| 267 | NM_000270 | NP           | 8 | 11 | 0.987650255 | Nucleoside phosphorylase                                                                        |
| 268 | NM_000198 | HSD3B2       | 6 | 8  | 0.987620567 | Hydroxy-delta-5-steroid dehydrogenase, 3 beta- and steroid delta-isomerase 2                    |
| 269 | NM_002899 | RBP1         | 8 | 11 | 0.987616851 | Retinol binding protein 1, cellular                                                             |
| 270 | NM_004287 | GOSR2        | 8 | 11 | 0.987610255 | Golgi SNAP receptor complex member 2                                                            |
| 271 | NM_013386 | SLC25A24     | 8 | 11 | 0.987602366 | Solute carrier family 25 (mitochondrial carrier; phosphate carrier), member 24                  |
| 272 | M21499    |              | 7 | 7  | 0.987498901 | Data not found                                                                                  |
| 273 | AF064846  | DISP2        | 7 | 11 | 0.987496524 | Similar to single stranded DNA binding protein 4                                                |
| 274 | AB040915  | STIM2        | 7 | 9  | 0.987484668 | Stromal interaction molecule 2                                                                  |
| 275 | NM_015846 | MBD1         | 8 | 11 | 0.987446159 | Methyl-CpG binding domain protein 1                                                             |
| 276 | D17156    | AFG3L2       | 6 | 11 | 0.987404711 | AFG3 ATPase family gene 3-like 2 (yeast)                                                        |
| 277 | NM_003038 | SLC1A4       | 8 | 11 | 0.987368612 | Solute carrier family 1 (glutamate/neutral amino acid transporter), member 4                    |
| 278 | NM_020140 | EB-1         | 7 | 9  | 0.987282264 | E2a-Pbx1-associated protein                                                                     |
| 279 | AL360204  |              | 6 | 8  | 0.987234473 | MRNA full length insert cDNA clone EUROIMAGE 980547                                             |
| 280 | X51524    | C6orf60      | 7 | 8  | 0.987077663 | Chromosome 6 open reading frame 60                                                              |
| 281 | AK024522  | GPCR5A       | 6 | 11 | 0.987032462 | G protein-coupled receptor, family C, group 5, member A                                         |
| 282 | NM_006316 |              | 5 | 8  | 0.98698656  | Data not found                                                                                  |
| 283 | NM_003040 | SLC4A2       | 8 | 10 | 0.986968698 | Solute carrier family 4, anion exchanger, member 2 (erythrocyte membrane protein band 3-like 1) |
| 284 | NM_018383 | WDR33        | 8 | 11 | 0.986946293 | WD repeat domain 33                                                                             |
| 285 | NM_005845 | ABCC4        | 8 | 11 | 0.98692695  | ATP-binding cassette, sub-family C (CFTR/MRP), member 4                                         |
| 286 | AK027220  | C6orf151     | 6 | 10 | 0.986910148 | Chromosome 6 open reading frame 151                                                             |
| 287 | L29140    | MYO1F        | 8 | 11 | 0.986898982 | Myosin IF                                                                                       |
| 288 | AL117629  | DKFZP434C245 | 8 | 11 | 0.986854565 | WD repeat domain 51A                                                                            |
| 289 | AK022082  | MSRA         | 8 | 11 | 0.986748961 | Methionine sulfoxide reductase A                                                                |
| 290 | M20838    | ECE1         | 6 | 8  | 0.986703763 | Endothelin converting enzyme 1                                                                  |
| 291 | NM_004062 | CDH16        | 8 | 10 | 0.986690672 | Cadherin 16, KSP-cadherin                                                                       |
| 292 | AK024999  |              | 5 | 10 | 0.98668941  | CDNA: FLJ21346 fis, clone COL02705                                                              |
| 293 | AF070564  |              | 8 | 11 | 0.986607171 | Clone 24571 mRNA sequence                                                                       |
| 294 | NM_006174 | NPY5R        | 7 | 11 | 0.9866038   | Neuropeptide Y receptor Y5                                                                      |
| 295 | NM_016031 |              | 8 | 11 | 0.986591357 | Data not found                                                                                  |

|     |           |          |   |    |             |                                                                                                                        |
|-----|-----------|----------|---|----|-------------|------------------------------------------------------------------------------------------------------------------------|
| 296 | AK021505  | GPC6     | 6 | 10 | 0.986402969 | Glypican 6                                                                                                             |
| 297 | NM_005137 | DGCR2    | 8 | 11 | 0.986334907 | DiGeorge syndrome critical region gene 2                                                                               |
| 298 | NM_014907 | FRMPD1   | 7 | 11 | 0.986220412 | FERM and PDZ domain containing 1                                                                                       |
| 299 | AK021904  | RPL7L1   | 8 | 11 | 0.986197574 | Ribosomal protein L7-like 1                                                                                            |
| 300 | NM_006767 | LZTR1    | 8 | 11 | 0.986191116 | Leucine-zipper-like transcription regulator 1                                                                          |
| 301 | S81335    | DCC      | 8 | 10 | 0.986151173 | Deleted in colorectal carcinoma                                                                                        |
| 302 | AK000023  |          | 7 | 11 | 0.986051986 | CDNA FLJ20016 fis, clone ADSE00529                                                                                     |
| 303 | NM_017847 | C1orf27  | 5 | 11 | 0.985932353 | 40S ribosomal protein S3 (RPS3B)                                                                                       |
| 304 | AL049291  | COL4A5   | 6 | 8  | 0.985922256 | Collagen, type IV, alpha 5 (Alport syndrome)                                                                           |
| 305 | NM_014239 | EIF2B2   | 8 | 11 | 0.985836718 | Eukaryotic translation initiation factor 2B, subunit 2 beta, 39kDa                                                     |
| 306 | NM_003256 | TIMP4    | 8 | 11 | 0.985714417 | Tissue inhibitor of metalloproteinase 4                                                                                |
| 307 | NM_005798 | RFP2     | 7 | 11 | 0.985705738 | Ret finger protein 2                                                                                                   |
| 308 | AB023156  | SLC9A8   | 5 | 10 | 0.985677135 | Solute carrier family 9 (sodium/hydrogen exchanger), isoform 8                                                         |
| 309 | AK025985  | FLJ35036 | 8 | 11 | 0.98567009  | Zinc finger and BTB domain containing 38                                                                               |
| 310 | AF251188  |          | 6 | 10 | 0.985659464 | Periodontal ligament cell specific protein 3 mRNA, partial sequence                                                    |
| 311 | NM_016059 | PPIL1    | 8 | 11 | 0.985466454 | Peptidylprolyl isomerase (cyclophilin)-like 1                                                                          |
| 312 | AK000950  |          | 8 | 11 | 0.985426719 | Similar to hypothetical protein (L1H 3 region) - human                                                                 |
| 313 | NM_003318 | TTK      | 8 | 10 | 0.985419342 | TTK protein kinase                                                                                                     |
| 314 | AK022961  | PANK3    | 7 | 11 | 0.985298948 | Solute carrier family 2 (facilitated glucose transporter), member 3 pseudogene 1                                       |
| 315 | NM_007024 | PL6      | 6 | 11 | 0.985193631 | Placental protein 6                                                                                                    |
| 316 | NM_014708 | KNTC1    | 8 | 11 | 0.985175634 | Kinetochore associated 1                                                                                               |
| 317 | NM_017759 | FLJ20309 | 8 | 11 | 0.98517225  | Hypothetical protein FLJ20309                                                                                          |
| 318 | AK022738  |          | 5 | 11 | 0.985163908 | CDNA FLJ12676 fis, clone NT2RM4002383                                                                                  |
| 319 | NM_018684 | KIAA1166 | 8 | 11 | 0.98515364  | KIAA1166                                                                                                               |
| 320 | L13197    | PLAC4    | 8 | 9  | 0.985112018 | Placenta-specific 4                                                                                                    |
| 321 | M30938    | XRCC5    | 8 | 11 | 0.985085202 | X-ray repair complementing defective repair in Chinese hamster cells 5 (double-strand-break rejoining; Ku autoantigen) |
| 322 | NM_001905 | CTPS     | 8 | 10 | 0.985040757 | CTP synthase                                                                                                           |
| 323 | NM_005869 | SDCCAG10 | 8 | 11 | 0.984976945 | Serologically defined colon cancer antigen 10                                                                          |
| 324 | NM_004163 | RAB27B   | 8 | 11 | 0.984958112 | RAB27B, member RAS oncogene family                                                                                     |
| 325 | NM_001906 | CTRB1    | 8 | 11 | 0.984946063 | Similar to Chymotrypsinogen B precursor                                                                                |
| 326 | NM_005506 | SCARB2   | 7 | 11 | 0.984897188 | Scavenger receptor class B, member 2                                                                                   |
| 327 | NM_016129 | COPS4    | 8 | 11 | 0.984893413 | COP9 constitutive photomorphogenic homolog subunit 4 (Arabidopsis)                                                     |
| 328 | AK024820  | C7orf25  | 7 | 11 | 0.984892822 | Chromosome 7 open reading frame 25                                                                                     |

|     |           |           |   |    |             |                                                                                                      |
|-----|-----------|-----------|---|----|-------------|------------------------------------------------------------------------------------------------------|
| 329 | NM_004915 | ABCG1     | 8 | 11 | 0.984777777 | ATP-binding cassette, sub-family G (WHITE), member 1                                                 |
| 330 | M92439    | LRPPRC    | 8 | 11 | 0.984756211 | Leucine-rich PPR-motif containing                                                                    |
| 331 | AF085877  | MTVR1     | 7 | 10 | 0.984752649 | Mouse Mammary Tumour Virus Receptor homolog 1                                                        |
| 332 | X98834    | SALL2     | 8 | 11 | 0.984672666 | Sal-like 2 (Drosophila)                                                                              |
| 333 | AF070637  | EFCBP2    | 6 | 7  | 0.9846256   | EF-hand calcium binding protein 2                                                                    |
| 334 | NM_014141 | CNTNAP2   | 5 | 11 | 0.984618321 | Contactin associated protein-like 2                                                                  |
| 335 | AL050175  |           | 6 | 8  | 0.984576556 | MRNA; cDNA DKFZp586G0822 (from clone DKFZp586G0822)                                                  |
| 336 | NM_007071 | HHLA3     | 8 | 11 | 0.984544212 | HERV-H LTR-associating 3                                                                             |
| 337 | AL117482  | ULK3      | 8 | 10 | 0.984435799 | Unc-51-like kinase 3 (C. elegans)                                                                    |
| 338 | NM_002317 | LOX       | 8 | 11 | 0.984411537 | Lysyl oxidase                                                                                        |
| 339 | NM_006774 |           | 8 | 11 | 0.984406467 | Data not found                                                                                       |
| 340 | Y10483    |           | 8 | 11 | 0.984355418 | Protein kinase, X-linked, pseudogene 1                                                               |
| 341 | U82970    | PHEX      | 8 | 9  | 0.984316201 | Phosphate regulating endopeptidase homolog, X-linked (hypophosphatemia, vitamin D resistant rickets) |
| 342 | NM_003681 | PDXK      | 8 | 11 | 0.984163795 | Pyridoxal (pyridoxine, vitamin B6) kinase                                                            |
| 343 | NM_017811 | UBE2R2    | 7 | 11 | 0.984131046 | Ubiquitin-conjugating enzyme E2R 2                                                                   |
| 344 | NM_001186 | BACH1     | 8 | 9  | 0.984110976 | BTB and CNC homology 1, basic leucine zipper transcription factor 1                                  |
| 345 | NM_000174 | GP9       | 8 | 11 | 0.984061417 | Glycoprotein IX (platelet)                                                                           |
| 346 | D17215    |           | 7 | 11 | 0.984023542 | Data not found                                                                                       |
| 347 | NM_003141 | TRIM21    | 8 | 11 | 0.98401467  | Tripartite motif-containing 21                                                                       |
| 348 | AL137383  | LOC153682 | 8 | 9  | 0.983999809 | Hypothetical protein LOC153682                                                                       |
| 349 | AL109705  | KIAA0256  | 7 | 10 | 0.983907453 | KIAA0256 gene product                                                                                |
| 350 | AL157503  | C2orf3    | 8 | 11 | 0.983877969 | Chromosome 2 open reading frame 3                                                                    |
| 351 | AK022013  | NPAS2     | 5 | 5  | 0.983798142 | Neuronal PAS domain protein 2                                                                        |
| 352 | AK025950  | FHOD3     | 5 | 10 | 0.983746826 | Formin homology 2 domain containing 3                                                                |
| 353 | NM_014941 | ZCWCC1    | 8 | 11 | 0.983699363 | MORC family CW-type zinc finger 2                                                                    |
| 354 | NM_001711 | BGN       | 8 | 11 | 0.983691138 | Biglycan                                                                                             |
| 355 | AK023300  |           | 8 | 10 | 0.9836519   | Data not found                                                                                       |
| 356 | AY008372  | OSBPL3    | 8 | 10 | 0.983623371 | Oxysterol binding protein-like 3                                                                     |
| 357 | D25274    | RAC1      | 8 | 11 | 0.983591597 | Ras-related C3 botulinum toxin substrate 1 (rho family, small GTP binding protein Rac1)              |
| 358 | NM_002078 | GOLGA4    | 8 | 11 | 0.983525269 | Golgi autoantigen, golgin subfamily a, 4                                                             |
| 359 | NM_005096 | ZNF261    | 8 | 11 | 0.983448864 | Zinc finger protein 261                                                                              |
| 360 | NM_001312 | CRIP2     | 8 | 11 | 0.983447692 | Cysteine-rich protein 2                                                                              |
| 361 | NM_005429 | VEGFC     | 8 | 11 | 0.983433239 | Vascular endothelial growth factor C                                                                 |

|     |           |          |   |    |             |                                                                                                |
|-----|-----------|----------|---|----|-------------|------------------------------------------------------------------------------------------------|
| 362 | AF085944  | ADORA2A  | 6 | 7  | 0.983427212 | Adenosine A2a receptor                                                                         |
| 363 | NM_017665 | ZCCHC10  | 8 | 11 | 0.983379336 | Zinc finger, CCHC domain containing 10                                                         |
| 364 | NM_017797 | BTBD2    | 8 | 11 | 0.9833647   | BTB (POZ) domain containing 2                                                                  |
| 365 | AJ001875  | KCNJ6    | 5 | 10 | 0.983114228 | Potassium inwardly-rectifying channel, subfamily J, member 6                                   |
| 366 | AK023107  | C9orf86  | 8 | 11 | 0.982881771 | Chromosome 9 open reading frame 86                                                             |
| 367 | U01147    | ABR      | 5 | 8  | 0.982847082 | Active BCR-related gene                                                                        |
| 368 | AF086261  |          | 7 | 8  | 0.982843695 | Hypothetical LOC339025                                                                         |
| 369 | AK026345  | C15orf20 | 6 | 7  | 0.982825281 | Chromosome 15 open reading frame 20                                                            |
| 370 | Z11852    | MOGAT2   | 6 | 9  | 0.982642799 | Monoacylglycerol O-acyltransferase 2                                                           |
| 371 | NM_016411 |          | 8 | 11 | 0.982542091 | Data not found                                                                                 |
| 372 | NM_005721 | ACTR3    | 8 | 11 | 0.982522994 | ARP3 actin-related protein 3 homolog (yeast)                                                   |
| 373 | NM_003485 | GPR68    | 6 | 8  | 0.982499049 | G protein-coupled receptor 68                                                                  |
| 374 | NM_000314 | PTEN     | 8 | 11 | 0.982475379 | Phosphatase and tensin homolog (mutated in multiple advanced cancers 1)                        |
| 375 | NM_002182 | IL1RAP   | 7 | 11 | 0.982381881 | Interleukin 1 receptor accessory protein                                                       |
| 376 | NM_003560 | PLA2G6   | 8 | 11 | 0.982300399 | Phospholipase A2, group VI (cytosolic, calcium-independent)                                    |
| 377 | AK023386  |          | 8 | 11 | 0.982296123 | Data not found                                                                                 |
| 378 | AF056419  | CTNND2   | 8 | 9  | 0.982219242 | Catenin (cadherin-associated protein), delta 2 (neural plakophilin-related arm-repeat protein) |
| 379 | U61735    | DNAH5    | 7 | 9  | 0.982164806 | Dynein, axonemal, heavy polypeptide 5                                                          |
| 380 | NM_016190 | C1orf10  | 8 | 11 | 0.982150342 | Cornulin                                                                                       |
| 381 | U81557    |          | 8 | 11 | 0.982137925 | Similar to hypothetical protein FLJ32191                                                       |
| 382 | AK000787  | SEMA6A   | 6 | 6  | 0.982047609 | Sema domain, transmembrane domain (TM), and cytoplasmic domain, (semaphorin) 6A                |
| 383 | AK026924  | FLJ21125 | 7 | 8  | 0.981958237 | Guanine nucleotide binding protein (G protein), beta polypeptide 1-like                        |
| 384 | NM_016151 | TAOK2    | 8 | 11 | 0.98191474  | TAO kinase 2                                                                                   |
| 385 | AK026733  | L3MBTL4  | 6 | 10 | 0.981897079 | L(3)mbt-like 4 (Drosophila)                                                                    |
| 386 | AL390184  | WIZ      | 8 | 11 | 0.981837851 | Widely-interspaced zinc finger motifs                                                          |
| 387 | AJ131607  |          | 6 | 9  | 0.981713404 | Trapped putative 3' terminal exon, clone B2D1                                                  |
| 388 | NM_002540 | ODF2     | 8 | 11 | 0.981607373 | Outer dense fiber of sperm tails 2                                                             |
| 389 | NM_000093 | COL5A1   | 7 | 10 | 0.981502859 | Collagen, type V, alpha 1                                                                      |
| 390 | J03048    | HPX      | 8 | 11 | 0.98139577  | Hemopexin                                                                                      |
| 391 | NM_012479 | YWHAG    | 8 | 11 | 0.981341847 | Tyrosine 3-monooxygenase/tryptophan 5-monooxygenase activation protein, gamma polypeptide      |
| 392 | NM_003035 | SIL      | 8 | 11 | 0.981296851 | TAL1 (SCL) interrupting locus                                                                  |
| 393 | NM_000798 | DRD5     | 8 | 10 | 0.981293203 | Dopamine receptor D5                                                                           |
| 394 | K03191    | CYP1A1   | 8 | 11 | 0.981227872 | Cytochrome P450, family 1, subfamily A, polypeptide 1                                          |

|     |           |          |   |    |             |                                                               |
|-----|-----------|----------|---|----|-------------|---------------------------------------------------------------|
| 395 | NM_004623 | TTC4     | 8 | 11 | 0.98118002  | Tetratricopeptide repeat domain 4                             |
| 396 | AK025020  | AP1G1    | 8 | 11 | 0.981132545 | Adaptor-related protein complex 1, gamma 1 subunit            |
| 397 | NM_020359 | PLSCR2   | 8 | 11 | 0.981075839 | Phospholipid scramblase 2                                     |
| 398 | AK025818  | SRGAP2   | 7 | 10 | 0.981050285 | SLIT-ROBO Rho GTPase activating protein 2                     |
| 399 | NM_000048 | ASL      | 8 | 11 | 0.980975325 | Argininosuccinate lyase                                       |
| 400 | AJ000414  | TRIP10   | 8 | 11 | 0.980938098 | Thyroid hormone receptor interactor 10                        |
| 401 | AK001362  | DCBLD2   | 8 | 10 | 0.98091697  | Discoidin, CUB and LCCL domain containing 2                   |
| 402 | AK022810  | FLJ12748 | 8 | 7  | 0.980873639 | Hypothetical protein FLJ12748                                 |
| 403 | NM_005030 | PLK1     | 7 | 9  | 0.980781083 | Polo-like kinase 1 (Drosophila)                               |
| 404 | AK021691  |          | 8 | 10 | 0.98075375  | Data not found                                                |
| 405 | NM_003362 | UNG      | 7 | 11 | 0.980649825 | Uracil-DNA glycosylase                                        |
| 406 | AL137473  |          | 8 | 10 | 0.980452063 | Data not found                                                |
| 407 | AF067777  | POU3F3   | 8 | 11 | 0.980446864 | POU domain, class 3, transcription factor 3                   |
| 408 | NM_001096 | ACLY     | 8 | 11 | 0.980403119 | ATP citrate lyase                                             |
| 409 | NM_017710 |          | 8 | 11 | 0.98030714  | Data not found                                                |
| 410 | NM_004595 | SMS      | 8 | 11 | 0.980285562 | Spermine synthase                                             |
| 411 | NM_002442 | MSH1     | 8 | 11 | 0.980269377 | Musashi homolog 1 (Drosophila)                                |
| 412 | AF245517  | ATP6V0A4 | 7 | 11 | 0.980216816 | ATPase, H+ transporting, lysosomal V0 subunit a isoform 4     |
| 413 | NM_001608 | ACADL    | 8 | 9  | 0.980136648 | Acyl-Coenzyme A dehydrogenase, long chain                     |
| 414 | NM_005165 | ALDOC    | 8 | 11 | 0.980127374 | Aldolase C, fructose-bisphosphate                             |
| 415 | AK026248  | FLJ22595 | 8 | 11 | 0.980059423 | ADP-ribosylation factor 7                                     |
| 416 | NM_014791 | MELK     | 8 | 11 | 0.979989632 | Maternal embryonic leucine zipper kinase                      |
| 417 | NM_013436 | NCKAP1   | 8 | 10 | 0.979972739 | NCK-associated protein 1                                      |
| 418 | NM_020158 | EXOSC5   | 8 | 11 | 0.979897736 | Exosome component 5                                           |
| 419 | AL117499  | C19orf13 | 8 | 11 | 0.979886511 | Family with sequence similarity 61, member A                  |
| 420 | NM_006257 | PRKCQ    | 7 | 11 | 0.979861532 | Protein kinase C, theta                                       |
| 421 | NM_018299 | FLJ11011 | 7 | 11 | 0.97977077  | Hypothetical protein FLJ11011                                 |
| 422 | NM_000218 | KCNQ1OT1 | 8 | 6  | 0.979757814 | Potassium voltage-gated channel, KQT-like subfamily, member 1 |
| 423 | NM_005196 |          | 8 | 10 | 0.979753394 | Data not found                                                |
| 424 | U90653    | ZDHHC1   | 8 | 11 | 0.979741495 | Zinc finger, DHHC-type containing 1                           |
| 425 | AF085866  | C19orf13 | 8 | 11 | 0.979718817 | Family with sequence similarity 61, member A                  |
| 426 | AK026512  |          | 7 | 10 | 0.979717217 | Similar to bA370B6.1 (similar to histone H2B)                 |
| 427 | AK025934  | EVI1     | 8 | 11 | 0.979668411 | Ecotropic viral integration site 1                            |

|     |           |          |   |    |             |                                                                                   |
|-----|-----------|----------|---|----|-------------|-----------------------------------------------------------------------------------|
| 428 | NM_013943 | CLIC4    | 8 | 9  | 0.979634294 | Chloride intracellular channel 4                                                  |
| 429 | D87458    | TRIM9    | 8 | 10 | 0.97958948  | Tripartite motif-containing 9                                                     |
| 430 | AK022953  | FLJ35725 | 8 | 11 | 0.979514751 | Hypothetical protein FLJ35725                                                     |
| 431 | AL137642  |          | 5 | 5  | 0.979475313 | MRNA; cDNA DKFZp434N065 (from clone DKFZp434N065)                                 |
| 432 | NM_018057 | SLC6A15  | 7 | 10 | 0.979427019 | Solute carrier family 6, member 15                                                |
| 433 | AF038554  | DENR     | 8 | 11 | 0.979391664 | Density-regulated protein                                                         |
| 434 | NM_018679 | TCP11    | 5 | 8  | 0.979276814 | T-complex 11 (mouse)                                                              |
| 435 | NM_017812 | EEF1G    | 8 | 11 | 0.979266721 | Eukaryotic translation elongation factor 1 gamma                                  |
| 436 | NM_002367 | MAGEB4   | 8 | 10 | 0.979179462 | Melanoma antigen family B, 4                                                      |
| 437 | NM_014306 | HSPC117  | 8 | 11 | 0.979177705 | Hypothetical protein HSPC117                                                      |
| 438 | U87169    | STYX     | 8 | 10 | 0.979140638 | Serine/threonine/tyrosine interacting protein                                     |
| 439 | NM_006543 |          | 7 | 11 | 0.979132163 | Data not found                                                                    |
| 440 | NM_018101 | CDCA8    | 8 | 11 | 0.979089056 | Cell division cycle associated 8                                                  |
| 441 | NM_006927 | SIAT4B   | 7 | 11 | 0.97897853  | ST3 beta-galactoside alpha-2,3-sialyltransferase 2                                |
| 442 | AK001351  | FLJ10489 | 7 | 8  | 0.978976603 | Hypothetical protein FLJ10489                                                     |
| 443 | NM_018198 | DNAJC11  | 8 | 11 | 0.978930909 | DnaJ (Hsp40) homolog, subfamily C, member 11                                      |
| 444 | AK001948  | MCCC2    | 7 | 9  | 0.978921409 | Methylcrotonoyl-Coenzyme A carboxylase 2 (beta)                                   |
| 445 | AK022241  | FLJ10774 | 8 | 11 | 0.978920434 | N-acetyltransferase-like protein                                                  |
| 446 | X72887    | ETFA     | 8 | 10 | 0.978898053 | TYRO3P protein tyrosine kinase pseudogene                                         |
| 447 | NM_000554 | CRX      | 8 | 11 | 0.978869597 | Cone-rod homeobox                                                                 |
| 448 | U94902    | CD44     | 8 | 9  | 0.978740955 | CD44 antigen (homing function and Indian blood group system)                      |
| 449 | NM_014576 | ACF      | 8 | 10 | 0.97871566  | Apobec-1 complementation factor                                                   |
| 450 | NM_006025 | P11      | 5 | 6  | 0.978661151 | 26 serine protease                                                                |
| 451 | AK024164  | RAFTLIN  | 8 | 11 | 0.978635328 | Raft-linking protein                                                              |
| 452 | NM_004188 | GFI1B    | 8 | 9  | 0.978594262 | Growth factor independent 1B (potential regulator of CDKN1A, translocated in CML) |
| 453 | D87440    | KIAA0252 | 8 | 11 | 0.978473368 | Rtf1, Paf1/RNA polymerase II complex component, homolog (S. cerevisiae)           |
| 454 | U17327    | NOS1     | 8 | 11 | 0.978414331 | Nitric oxide synthase 1 (neuronal)                                                |
| 455 | X71490    |          | 8 | 11 | 0.978398355 | Data not found                                                                    |
| 456 | NM_004724 | ZW10     | 8 | 11 | 0.978318609 | ZW10, kinetochore associated, homolog (Drosophila)                                |
| 457 | M23161    | MCFD2    | 8 | 11 | 0.978156764 | Multiple coagulation factor deficiency 2                                          |
| 458 | NM_003866 | INPP4B   | 7 | 10 | 0.978143881 | Inositol polyphosphate-4-phosphatase, type II, 105kDa                             |
| 459 | J04948    | ALPPL2   | 7 | 11 | 0.978038779 | Alkaline phosphatase, placental-like 2                                            |
| 460 | AJ012496  |          | 6 | 7  | 0.978026923 | Data not found                                                                    |

|     |           |          |   |    |             |                                                                     |
|-----|-----------|----------|---|----|-------------|---------------------------------------------------------------------|
| 461 | AK001731  | MGC17943 | 8 | 11 | 0.978005562 | Hypothetical protein MGC17943                                       |
| 462 | NM_002236 | KCNF1    | 5 | 7  | 0.977948605 | Potassium voltage-gated channel, subfamily F, member 1              |
| 463 | AL137262  | TNIP2    | 8 | 10 | 0.977926058 | TNFAIP3 interacting protein 2                                       |
| 464 | U66621    | RAB1B    | 8 | 11 | 0.977874425 | RAB1B, member RAS oncogene family                                   |
| 465 | AK022434  | MTSS1    | 6 | 10 | 0.977866698 | Metastasis suppressor 1                                             |
| 466 | AK025276  | POLD2    | 5 | 9  | 0.977860929 | Polymerase (DNA directed), delta 2, regulatory subunit 50kDa        |
| 467 | NM_006107 | CROP     | 8 | 11 | 0.977762438 | Cisplatin resistance-associated overexpressed protein               |
| 468 | NM_000127 | EXT1     | 8 | 11 | 0.977724562 | Exostoses (multiple) 1                                              |
| 469 | NM_001355 | DDT      | 8 | 11 | 0.977638673 | D-dopachrome tautomerase                                            |
| 470 | NM_004250 |          | 7 | 10 | 0.977582243 | Data not found                                                      |
| 471 | NM_004447 | EPS8     | 8 | 11 | 0.977558114 | Epidermal growth factor receptor pathway substrate 8                |
| 472 | AF069469  | SC5DL    | 7 | 10 | 0.977544093 | Sterol-C5-desaturase (ERG3 delta-5-desaturase homolog, fungal)-like |
| 473 | NM_005160 | ADRBK2   | 8 | 10 | 0.977490197 | Adrenergic, beta, receptor kinase 2                                 |
| 474 | NM_007354 | GR6      | 8 | 11 | 0.977484985 | Putative GR6 protein                                                |
| 475 | AK001740  | ANKMY2   | 8 | 8  | 0.977475805 | Ankyrin repeat and MYND domain containing 2                         |
| 476 | NM_014773 | KIAA0141 | 7 | 10 | 0.977411705 | KIAA0141                                                            |
| 477 | AK024824  | SIAT4A   | 5 | 9  | 0.97737046  | ST3 beta-galactoside alpha-2,3-sialyltransferase 1                  |
| 478 | AK026498  | CYP2U1   | 6 | 10 | 0.97735808  | Cytochrome P450, family 2, subfamily U, polypeptide 1               |
| 479 | AF070619  | BDH      | 7 | 11 | 0.977292655 | 3-hydroxybutyrate dehydrogenase (heart, mitochondrial)              |
| 480 | NM_014350 | TNFAIP8  | 8 | 11 | 0.977284011 | Tumor necrosis factor, alpha-induced protein 8                      |
| 481 | AK022298  | DHFR     | 8 | 11 | 0.977275465 | Dihydrofolate reductase                                             |
| 482 | AF086180  | PFKL     | 8 | 11 | 0.977244591 | Phosphofructokinase, liver                                          |
| 483 | NM_004321 | KIF1A    | 8 | 8  | 0.977163597 | Kinesin family member 1A                                            |
| 484 | NM_016486 | LOC51249 | 7 | 11 | 0.977089494 | Chromosome 1 open reading frame 154                                 |
| 485 | AL080111  | NEK7     | 8 | 11 | 0.977074812 | NIMA (never in mitosis gene a)-related kinase 7                     |
| 486 | NM_001065 | TNFRSF1A | 8 | 11 | 0.977050285 | Tumor necrosis factor receptor superfamily, member 1A               |
| 487 | AL049310  |          | 5 | 6  | 0.97698707  | MRNA; cDNA DKFZp564B206 (from clone DKFZp564B206)                   |
| 488 | NM_003592 | CUL1     | 8 | 11 | 0.976890913 | Cullin 1                                                            |
| 489 | NM_018323 | PI4K2B   | 8 | 11 | 0.9768171   | Phosphatidylinositol 4-kinase type-II beta                          |
| 490 | NM_001188 | BAK1     | 8 | 11 | 0.976765826 | BCL2-antagonist/killer 1                                            |
| 491 | AL050355  |          | 8 | 11 | 0.976722626 | Data not found                                                      |
| 492 | AK000617  | LOC92912 | 8 | 11 | 0.976718991 | Hypothetical protein LOC92912                                       |
| 493 | NM_001814 | CTSC     | 7 | 11 | 0.976687658 | Cathepsin C                                                         |

|     |           |               |   |    |             |                                                                                         |
|-----|-----------|---------------|---|----|-------------|-----------------------------------------------------------------------------------------|
| 494 | NM_006983 | MMP23B        | 8 | 11 | 0.976685181 | Matrix metalloproteinase 23A                                                            |
| 495 | AB037861  | DKFZP586J0619 | 8 | 11 | 0.976640501 | DKFZP586J0619 protein                                                                   |
| 496 | NM_006624 | ZMYND11       | 8 | 11 | 0.97662371  | Zinc finger, MYND domain containing 11                                                  |
| 497 | AL390181  | C21orf86      | 8 | 10 | 0.976549505 | Chromosome 21 open reading frame 86                                                     |
| 498 | NM_005606 | LGMN          | 8 | 11 | 0.976538551 | Legumain                                                                                |
| 499 | AF147423  | SOX6          | 8 | 9  | 0.976318934 | SRY (sex determining region Y)-box 6                                                    |
| 500 | NM_017624 |               | 8 | 10 | 0.976276824 | Data not found                                                                          |
| 501 | NM_014578 | RHOD          | 8 | 11 | 0.97627667  | Ras homolog gene family, member D                                                       |
| 502 | NM_000302 | PLOD1         | 8 | 11 | 0.976252005 | Procollagen-lysine 1, 2-oxoglutarate 5-dioxygenase 1                                    |
| 503 | AL353933  | SLC22A15      | 6 | 8  | 0.976220095 | Solute carrier family 22 (organic cation transporter), member 15                        |
| 504 | AF089811  | CYP19A1       | 6 | 6  | 0.976197254 | Cytochrome P450, family 19, subfamily A, polypeptide 1                                  |
| 505 | NM_006569 | CGREF1        | 8 | 10 | 0.9761492   | Cell growth regulator with EF-hand domain 1                                             |
| 506 | AF087991  | NTNG1         | 8 | 11 | 0.976099488 | Netrin G1                                                                               |
| 507 | AB002368  | XPO6          | 7 | 10 | 0.976023653 | Exportin 6                                                                              |
| 508 | NM_017586 | C9orf7        | 7 | 11 | 0.976021796 | Chromosome 9 open reading frame 7                                                       |
| 509 | AK027013  | C16orf28      | 8 | 11 | 0.976015779 | Chromosome 16 open reading frame 28                                                     |
| 510 | NM_006118 | HAX1          | 6 | 9  | 0.975914656 | HCLS1 associated protein X-1                                                            |
| 511 | AF039697  | NOXA1         | 8 | 11 | 0.975914183 | NADPH oxidase activator 1                                                               |
| 512 | AK024508  |               | 8 | 11 | 0.975907891 | Data not found                                                                          |
| 513 | NM_005815 | ZNF443        | 8 | 11 | 0.975884933 | Zinc finger protein 443                                                                 |
| 514 | NM_004751 | GCNT3         | 8 | 11 | 0.975775942 | Glucosaminyl (N-acetyl) transferase 3, mucin type                                       |
| 515 | NM_018471 | LEREPO4       | 8 | 11 | 0.97576135  | Likely ortholog of mouse immediate early response, erythropoietin 4                     |
| 516 | AY009402  | WNT8A         | 7 | 9  | 0.975705259 | Wingless-type MMTV integration site family, member 8A                                   |
| 517 | NM_012242 | DKK1          | 8 | 11 | 0.975624848 | Dickkopf homolog 1 (Xenopus laevis)                                                     |
| 518 | AJ012502  | RAC1          | 8 | 11 | 0.975607388 | Ras-related C3 botulinum toxin substrate 1 (rho family, small GTP binding protein Rac1) |
| 519 | L21934    | SOAT1         | 8 | 11 | 0.975577429 | Sterol O-acyltransferase (acyl-Coenzyme A: cholesterol acyltransferase) 1               |
| 520 | NM_003545 | HIST1H4E      | 8 | 10 | 0.975524067 | Histone 1, H4e                                                                          |
| 521 | NM_004518 | KCNQ2         | 7 | 8  | 0.975472438 | Potassium voltage-gated channel, KQT-like subfamily, member 2                           |
| 522 | D17220    |               | 8 | 11 | 0.975419218 | Data not found                                                                          |
| 523 | NM_006904 | PRKDC         | 8 | 11 | 0.975303714 | Protein kinase, DNA-activated, catalytic polypeptide                                    |
| 524 | AK024447  |               | 8 | 11 | 0.975258907 | Data not found                                                                          |
| 525 | NM_002853 | RAD1          | 8 | 10 | 0.975203649 | RAD1 homolog (S. pombe)                                                                 |
| 526 | AL137366  |               | 6 | 9  | 0.975146368 | CDNA FLJ40335 fis, clone TESTI2031935                                                   |



527

AK026129 BICC1

7

6 0.975107032 Bicaudal C homolog 1 (Drosophila)
